# Supplementary material for: Microarray-based target identification using drug hypersensitive fission yeast expressing ORFeome
Source: Royal Society of Chemistry journal article supplement (doi:10.1039/c0mb00326c), 2011-02-22
Supplement: c0mb00326c_s1.csv [file c0mb00326c_s1.csv]

SeqID	GeneID	Lethal (Individually checked)	LOG2 (Induced/Uninduced)	Gene name1	Gene name2	Gene product
TI4896S004905	44/F05	Lethal	-6.35	SPAC14C4.03	mek1	serine/threonine protein kinase; FHA domain (phosphopeptide binding); Cds1/Rad53/Chk2 family; meiosis-specific kinase; involved in meiosis; involved in meiotic recombination (regulation); involved in meiotic recombination checkpoint; phosphorylates Cdc2p (Tyr-15)
TI4896S000997	36/H10		-6.33	SPBC1773.09c		conserved hypothetical; DNAJ domain protein
TI4896S004237	39/F02		-6.27	SPAC17A2.09c	csx1	RNA-binding post-transcriptional regulator RNA-binding protein; involved in post-transcriptional regulation; rrm RNA recognition motif; no apparent Sc ortholog
TI4896S003609	01/A11		-6.27	SPAC25A8.03c	SPAC3C7.15c	hypothetical protein; 1404 bp; sequence orphan
TI4896S003452	37/B12	Lethal	-6.22	SPAC664.11	ssc1; ssp1	mitochondrial chaperonin; heat shock protein 70 family; involved in mitochondrial protein import; nvolved in heat shock response; involved in stress response
TI4896S001783	22/C05	Lethal	-6.13	SPBC14C8.02		mitochondrial import inner membrane translocase subunit
TI4896S001626	37/G12	Lethal	-5.87	SPBC9B6.09c		transport ATP binding protein
TI4896S001959	47/D02		-5.81	SPBC6B1.02		Ark1/Prk1 family protein kinase; serine/threonine protein kinase; similar to Sp SPBC557.04 and SPCP1E11.02; actin cortical patch component; consensus phosphorylation target site [LI]XXQXTG (putative)
TI4896S001909	43/H07		-5.80	SPBC365.02c	cox10	involved in cytochrome c oxidase biogenesis; heme farnesyl transferase; involved in heme A synthesis
TI4896S004160	16/E09		-5.74	SPAC8E11.03c	dmc1; dmp1; spdmc1	involved in meiotic recombination; DNA-binding protein; helix-hairpin-helix; AAA family ATPase; involved in strand exchange
TI4896S000714	37/B05		-5.61	SPCC74.09		RNA-binding protein; rrm RNA recognition motif (4); similar to Sp nrd1 (paralog)
TI4896S004335	47/C06	Lethal	-5.55	SPAC4H3.05	srs2	UVRD helicase; ATP-dependent; DNA helicase activity; involved in DNA damage response; involved in DNA damage resistance; involved in meiotic recombination; involved in suppression of meiotic recombination (required); involved in DNA repair; involved in double-strand break repair
TI4896S002949	17/E11	Lethal	-5.54	SPAC227.03c		mitochondrial carrier; involved in mitochondrial transport; unknown specificity
TI4896S000703	47/E05		-5.48	SPCC297.05		small GTP binding protein; DENN domain; no apparent Sc ortholog
TI4896S004816	21/H06	Lethal	-5.45	SPAC890.02c	alp7; mai1	TACC homolog; coiled-coil predicted; non-essential; deletion mutant results in astral microtubule diminishment; deletion mutant results in short metaphase spindles; no apparent orthologs
TI4896S003434	48/C06	Lethal	-5.44	SPAC824.02		negative regulator of vesicle formation; negative regulator of COPII vesicle formation; involved in intracellular protein transport
TI4896S003610	47/C01	Lethal	-5.42	SPAC25A8.01c		SNF2 family; DNA-dependent ATPase domain; helicase C-terminal domain; involved in chromosome organization and biogenesis (sensu Eukarya); CUE domain protein (inferred from context)
TI4896S003217	36/E12	Lethal	-5.40	SPAC56F8.10	met9; met5	methylenetetrahydrofolate reductase (NADPH) activity; involved in methionine metabolism
TI4896S001548	41/B01	Lethal	-5.38	SPBC28F2.12	rpb1	DNA-directed RNA polymerase II (largest subunit); involved in transcription from Pol II promoter; DNA-directed RNA polymerase activity (function of complex); DNA binding activity; interacts physically with Rpb5p
TI4896S000015	21/G10		-5.30	SPCC757.11c		transporter; unknown specificity; no apparent Sc ortholog
TI4896S001138	23/H09	Lethal	-5.30	SPBC947.12	kms2	predicted coiled-coil; similar to Sp kms1, a protein required for the formation of meiotic prophase-specific nuclear architecture
TI4896S001457	34/A10	Lethal	-5.29	SPBC8D2.20c	sec31	COPII-coated vesicle component; WD repeat protein; involved in intracellular protein transport; involved in secretory pathway (required); involved in cell cycle progression (required)
TI4896S001268	19/A05	Lethal	-5.24	SPBC146.05c	cwf25	eukaryotic conserved protein; complexed with Cdc5p; Sc YNL245C is essential; predicted coiled-coil
TI4896S002652	36/D12	Lethal	-5.23	SPBC16A3.17c		transporter; unknown specificity; similar to Sp SPAC3H1.06C (paralog)
TI4896S001578	39/A05	Lethal	-5.22	SPBC2F12.13	klp5	kinesin-like protein; kinesin family; microtubule-destabilizing Kin I family; KIP3 subfamily; involved in microtubule disassembly; involved in meiosis (required); regulates the establishment of metaphase; regulates the onset of anaphase A; deletion mutant results in resistance to microtubule poison thiabendazole; deletion mutant results in abnormally long cytoplasmic microtubules; involved in chr…
TI4896S000223	31/B04	Lethal	-5.20	SPCC1183.07		RNA-binding protein; S1 RNA binding domain; ribonucleoprotein (RNP) complex; processome component; involved in rRNA processing
TI4896S003830	43/F06		-5.05	SPAC823.10c		mitochondrial carrier
TI4896S003478	07/E07	Lethal	-4.99	SPAC17A5.17	SPAC1610.01	hypothetical protein; sequence orphan
TI4896S003853	30/H04	Lethal	-4.98	SPAC4F8.13c	rng2	IQGAP; RAS GTPase-activating-like; non-essential; target RAS; IQ domains; similar to S. cerevisiae YPL242C; required for cytokinesis; component of the contractile F-actin ring; required for its construction following assembly of F-actin at the division site.
TI4896S000444	19/H11		-4.95	SPCC645.01	cig1; SPCC4E9.02	B-type cyclin; G1/S transition
TI4896S002500	26/D10		-4.95	SPBC1604.20c	tea2; klp4	kinesin-like protein; KIP2 subfamily; involved in cell polarity (required); involved in microtubule based movement (required); involved in the localization of polarity factors; involved in actin cytoskeletal organization
TI4896S003246	48/D08	Lethal	-4.94	SPAC10F6.02c	prp22	ATP-dependent RNA helicase; involved in mRNA splicing; complexed with Cdc5p
TI4896S004853	48/G03	Lethal	-4.94	SPAPJ730.01	win1; SPAC1006.09; SPAC1250.06c	serine/threonine protein kinase; MAP kinase kinase kinase (MAPKKK); involved in mitotic control; Spc1 SAPK cascade; activator of Wis1p by phosphorylation in response to high osmolarity; G2/M phase transition
TI4896S003141	37/B08		-4.93	SPAC222.10c	byr4	involved in spindle assembly checkpoint; involved in cytokinesis; involved in septation (regulation) (negative); two-component GAP for the GTPase spg1 (with cdc16); suppressor of ras1; dosage-dependent inhibitor of cytokinesis
TI4896S002014	47/G12		-4.90	SPBC685.01	pic1; SPBC336.15	inner centromere protein; involved in chromosome segregation; involved in cytokinesis; serine-rich protein; interacts physically with Ark1p
TI4896S000448	30/H12	Lethal	-4.89	SPCC645.05c	myo2	myosin II; IQ domain; essential; involved in contractile ring assembly; involved in cytokinesis; regulated by phosphorylation of a C-terminal coiled-coil domain; requires a functional septation initiation network; interacts physically with Rlc1p
TI4896S004644	49/G11		-4.88	SPAC1093.01	SPAC12B10.18	PPR domains; translational regulator activity
TI4896S004533	19/E01	Lethal	-4.86	SPAC23D3.01		conserved hypothetical; PWWP domain protein; involved in cell growth; similar to Sp SPBC215.07C and SPBC29A3.13C (paralogs)
TI4896S003195	23/E06		-4.86	SPAC1A6.10	SPAC30D11.15c	Moeb/ThiF domain
TI4896S004107	48/F06	Lethal	-4.86	SPAC6G9.04		pleckstrin homology domain
TI4896S003680	26/C03	Lethal	-4.82	SPAC4G9.05		RNA-binding protein; pumilio family
TI4896S001233	34/C09	Lethal	-4.78	SPBC646.01c	tor2; SPBC216.07c	phosphatidylinositol kinase; similar to Sp TOR1 (paralog); involved in starvation response (required); involved in stress response
TI4896S003278	11/H01	Lethal	-4.76	SPAC1565.06c	spg1; sid3	GTPase Spg1; Ras family;�@essential; activated by Byr4p and Cdc16p two-component GAP; similar to S. cerevisiae YML064C; SIN component; involved in regulation of septation; involved in septation (required); involved in cytokinesis (required); involved in mitotic exit; deletion mutant results in absence of division septum resulting in elongated multinucleate cells; overexpression induces septum for…
TI4896S000408	43/B07	Lethal	-4.76	SPCC4B3.16		eukaryotic conserved protein; TOR signaling pathway
TI4896S000117	29/G02	Lethal	-4.72	SPCC736.14	dis1	microtubule-associated protein; involved in sister chromatid separation (required); phosphorylated at the Cdc2p target sites; basic central region is essential for microtubule association; involved in spindle kinetochore attachment; plus end-binding microtubule destabilizer; MAP215/Dis1 family; HEAT repeat
TI4896S002137	37/E09	Lethal	-4.71	SPBC13E7.03c		SAM domain (sterile alpha motif)
TI4896S003726	10/B10		-4.67	SPAC17G8.10c	dma1	spindle assembly checkpoint component; required to prevent septum formation if spindle function is compromised; required to prevent premature exit from mitosis if spindle function is compromised; zinc finger protein; zf-C3HC4 type (RING finger); ubiquitin ligase (E3); FHA domain (phosphopeptide binding); involved in cytokinesis (regulation); involved in septation (regulation); possibly prevents m…
TI4896S001406	37/B09		-4.66	SPBC30B4.06c		GIDA family
TI4896S004196	39/C09	Lethal	-4.65	SPAC3A11.01	SPAC328.01c	hypothetical GTPase activating protein; putative Importin-beta family member; yeast msn5 importin-beta family; exportin 5 family; involved in nuclear export
TI4896S003419	43/H05	Lethal	-4.64	SPAC343.06c		scramblase; possibly palmitoylated; potential protein kinase C phosphorylation site; Ca2+ activated phopholipid scrambling activity in vitro; possible WW domain binding; possiblr SH3 domain binding; involved in lipid metabolism
TI4896S004868	47/D10		-4.63	SPAC29A4.11	rga3	GTPase activator; RhoGAP domain; LIM domain; required for rho-like GTPases
TI4896S004183	49/F02	Lethal	-4.62	SPAC3H5.03c	klp1; pkl1; SPAC3A11.14c	kinesin-like protein; Kar3 subfamily; ATPase; involved in mitotic spindle function; similar to Sp SPAC664.10
TI4896S000338	47/B07	Lethal	-4.61	SPCC24B10.01	cdc21; mcm4; SPCC16A11.17	MCM complex subunit; involved in DNA replication (initiation) (required)
TI4896S000650	39/E01	Lethal	-4.61	SPCC1450.11c	cek1	Ser/Thr protein kinase Cek1 serine/threonine protein kinase; overexpression suppresses anaphase blocking mutation cut8
TI4896S000966	36/F03	Lethal	-4.61	SPBC660.14	mik1	serine/threonine protein kinase; mitosis inhibitor protein kinase; involved in DNA replication checkpoint; involved in DNA damage checkpoint; inhibitory tyrosine phosphorylation of cdc2 on tyrodine 15; expressed at G1-S phase; regulated by DSC1/MBF complex
TI4896S004423	28/E06		-4.58	SPAC19G12.14	its3	1-phosphatidylinositol-4-phosphate 5-kinase activity; involved in cytokinesis (regulation); coordinately regulates cytokinesis with Ppb1p
TI4896S001696	48/E06	Lethal	-4.57	SPBP23A10.07	rpa2	DNA-directed RNA polymerase I (subunit)
TI4896S001421	41/H03		-4.55	SPBC27B12.13	SPBC8D2.22	mitochondrial outer membrane translocase complex; involved in mitochondrial outer membrane protein import; mitochondrial import receptor
TI4896S000835	31/A01	Lethal	-4.53	SPCC1919.10c	myo52	class V myosin; involved in cell polarity and cytokinesis; IQ domains; DIL domain
TI4896S004078	30/H09	Lethal	-4.51	SPAC3G9.12		CLASP family microtubule-associated protein Cls1; HEAT repeat
TI4896S000106	22/D04	Lethal	-4.46	SPCC736.03c		phenylalanyl-tRNA synthetase; involved in phenylalanyl-tRNA aminoacylation; phenylalanine-tRNA ligase activity
TI4896S003027	48/A06		-4.45	SPAC22F3.06c		mitochondrial lon protease homolog Lon protease homolog; ATP-dependent peptidase activity; DNA-binding protein; involved in ATP-dependent proteolysis
TI4896S004920	23/C04	Lethal	-4.41	SPAC2H10.01		involved in transcriptional regulation; zinc finger protein; zf-fungal Zn(2)-Cys(6) binuclear cluster domain
TI4896S001995	21/G03		-4.39	SPBC4F6.16c		oxidase; FAD dependent; involved in protein folding; involved in protein disulfide bond formation
TI4896S002243	29/E07	Lethal	-4.36	SPBC25H2.03		HEAT repeat; involved in phospholipid metabolism; involved in vacuole inheritance; involved in stress-induced increase of phosphatidylinositol 3,5-bisphosphate
TI4896S001389	27/E12		-4.34	SPBC3D6.03c		metallo-beta-lactamase family protein; similar to Sp SPAC1D4.10
TI4896S001927	48/E08		-4.34	SPBC29A10.04	psm1; smc1	cohesin subunit; involved in sister chromatid cohesion (required); essential; interacts physically with Rad21p
TI4896S001600	47/E01	Lethal	-4.33	SPBC18H10.01	SPBC11G11.07	karyopherin-beta; involved in nuclear protein import; involved in mRNA export
TI4896S004446	48/D01		-4.26	SPAC26H5.05		involved in transcriptional regulation; ankyrin repeat protein
TI4896S004597	39/E03	Lethal	-4.26	SPAC17C9.03	tif471	translation initiation factor (eIF4G); interacts physically with 43S ribosomal preinitiation complex; interacts physically with Tif45p; MIF43 domain
TI4896S002638	34/F04		-4.26	SPBC16G5.09		serine carboxypeptidase family; peptidase family S10; predicted N-terminal signal sequence
TI4896S003073	29/B07		-4.25	SPAC2G11.01	SPAC16C9.07	serine/threonine protein kinase; similar to Sp pom1
TI4896S002198	29/D04	Lethal	-4.25	SPBC776.04	sec2302; sec23-b	GTPase activator; involved in intracellular protein transport; COPII-coated vesicle component; similar to Sp SPCC31H12.07 (paralog)
TI4896S004762	48/H06	Lethal	-4.22	SPAC19B12.03	bgs3	1,3-beta-glucan synthase subunit; glycosyl transferase family 48; essential; involved in cell wall biosynthesis (required); involved in cellular elongation; similar to Sp SPCC1840.02c and SPBC19G7.05c and SPAC24C9.07c
TI4896S004538	48/F08	Lethal	-4.18	SPAC23D3.06c		nucleoporin; nuclear pore complex; involved in nuclear export; involved in nuclear import; involved in nuclear export of the small ribosomal subunit
TI4896S001011	36/H03		-4.14	SPBC1271.12	kes1	oxysterol binding protein; involved in ergosterol biosynthesis; similar to Sp SPBC646.08c and SPBC354.07c and SPCC23B6.01; non-essential
TI4896S000658	18/A03		-4.13	SPCC1442.03	SPCC1450.19	mitochondrial carrier
TI4896S004516	09/F08		-4.13	SPAC25G10.02	ydc2	cruciform cutting endonuclease; holliday junction resolvase component; SAP domain; DNA-binding protein; SAP domain (SMART); involved in mitochondrial DNA maintenance
TI4896S000617	37/H01		-4.11	SPCC1902.01	gaf1; SPCC417.01c	ranSpription factor; involved in transcriptional activation; zinc finger protein; zf-GATA type
TI4896S004379	29/F05	Lethal	-4.10	SPAC2F3.06c	kap104	importin beta-2 subunit (transportin); beta-karyopherin; involved in nuclear transport of mRNA-binding proteins; HEAT repeat
TI4896S003795	42/H10		-4.08	SPAC23H3.12c		hypothetical protein
TI4896S003903	30/G03		-4.07	SPAPJ736.01	rif1; tap1; tap11; SPAC6F6.17	involved in telomere maintenance; recruited to the telomeres by Taz1p
TI4896S004546	37/A12	Lethal	-4.06	SPAC23D3.14c		alpha-amylase; GPI anchored protein; glycoprotein; no apparent Sc ortholog
TI4896S002687	46/G12	Lethal	-4.06	SPBC16C6.09		dolichyl-phosphate-mannose-protein mannosyltransferase; PMT family; MIR domains
TI4896S000157	25/E10	Lethal	-4.05	SPCC4G3.14		DNAJ domain protein
TI4896S000844	34/B11	Lethal	-4.03	SPCC1840.02c	bgs4	1,3-beta-glucan synthase subunit; glycosyl transferase family 48; involved in cell wall biosynthesis; similar to Sp SPAC24C9.07c and SPBC19G7.05c and SPAC19B12.03
TI4896S001269	27/H10	Lethal	-4.02	SPBC146.06c		conserved hypothetical protein; similar to O. sativa Q9LWI8 A. thaliana F11A17.9 human KIAA1018 and C. elegans C01G5.8; no Sc ortholog; non-essential
TI4896S004928	52/B03		-3.99	SPAC11E3.06	map1	pheromone receptor transcriptional activator; MADS-box domain; SRF-type transcription factor (DNA-binding and dimerization); involved in mating-type determination; involved in the transcription of mating-type specific genes; involved in P-cell specific gene expression (required)
TI4896S003310	20/F02		-3.94	SPAC57A10.12c	ura3	dihydroorotate dehydrogenase; involved in pyrimidine base biosynthesis; dihydroorotate dehydrogenase activity
TI4896S000437	48/C05	Lethal	-3.93	SPCC550.11		RanBP7/importin-beta/Cse1p family; RanGTP-binding protein; involved in mRNA export; involved in mRNA decay
TI4896S002179	34/B06	Lethal	-3.93	SPBC4C3.05c	nuc1; rpa1; SPBC4C3.05a	DNA-directed RNA polymerase I (large subunit); involved in the formation of the nucleolus (required)
TI4896S002677	33/G06	Lethal	-3.92	SPBC543.09		respiratory chain complex assembly protein; involved in postranslational assembly and turnover of misfolded peptides; peptidase family M41; AAA family ATPase; involved in mitochondrial signal peptide processing
TI4896S003432	42/H04		-3.92	SPAC343.18		zf-C3HC4 type (RING finger); ubiquitin ligase (E3); similar to Sp SPAC19A8.10 (paralog); no apparent Sc ortholog
TI4896S002080	27/F04		-3.90	SPBC1703.06	pof10	F-box protein
TI4896S004377	05/D08	Lethal	-3.86	SPAC2F3.04c		single-stranded DNA-binding protein; involved in mitochondrial DNA replication
TI4896S001849	48/H01	Lethal	-3.85	SPBC19G7.05c	cps1; drc1; bgs1	1,3-beta-D-glucan synthase subunit; glycosyl transferase family 48; involved in septation; involved in cell polarity (maintenance); involved in conjugation; involved in spore wall assembly; involved in spore germination; involved in cell wall biosynthesis; mutation confers hypersensitivity to cyclosporin A and papulacandin B; regulator of DNA replication; phosphorylated by CDK; similar to Sp SPCC…
TI4896S004849	17/C05		-3.85	SPAC1006.05c	och1	alpha-1,6-mannosyltransferase; Transfers an alpha-D-mannosyl residue from GDP-mannose into lipid-linked oligosaccharide, forming an alpha- 1,6-D-mannosyl-D-mannose linkage; involved in the initiation of outer chain elongation of asparagine-linked oligosaccharides of the type Man(9)GlcNAc(2) present in the cell wall; expression induced by salt stress
TI4896S003809	34/C05	Lethal	-3.83	SPAC4A8.05c	myo3	myosin-3 isoform, heavy chain (Type II myosin); involved in cytokinesis; involved in contractile ring assembly; non-essential
TI4896S000133	27/H11	Lethal	-3.81	SPCC1682.08c		RNA-binding protein; pumilio family; similar to Sp SPAC4G9.05; similar to N. crassa B17C10.150; no Sc ortholog
TI4896S001373	33/G04	Lethal	-3.77	SPBC651.01c	SPBC725.18c	GTPase; GTP-binding protein; GTP1/OBG family; NOG subfamily; involved in ribosome biogenesis
TI4896S003546	36/A04	Lethal	-3.77	SPAC3H1.11		transcriptional regulator; involved in transcriptional; regulation; zinc finger protein; zf-C2H2 type
TI4896S004117	27/H03		-3.76	SPAC6G9.14		serine-rich protein; pumilio family; RNA-binding protein; involved in the transport of telomere silencing proteins
TI4896S003937	06/G04	Lethal	-3.74	SPAC3F10.12c		centromere binding protein; basic helix-loop-helix (bHLH); DNA-binding protein
TI4896S002299	35/F05		-3.74	SPBC4B4.02c		involved in control of mitochondrial synthesis of Atp6p and Atp8p
TI4896S004227	38/E07	Lethal	-3.73	SPAC1B1.03c		karyopherin-beta; targets proteins with nuclear localization (NLS) sequences to the nuclear pore complex; armadillo repeat protein; HEAT repeat
TI4896S000288	24/H03	Lethal	-3.72	SPCC1020.05		metallophosphatase
TI4896S004341	28/D12		-3.71	SPAC4H3.11c		spindle pole body protein; coiled-coil region;predicted; essential; no apparent orthologs
TI4896S003364	29/E05		-3.70	SPAC57A7.10c	sec21	adaptin; coatomer (gamma subunit); the coatomer is a cytosolic protein complex that binds to dilysine motifs and reversibly associates with Golgi non- clathrin-coated vesicles, which further mediate biosynthetic protein transport from the ER, via the Golgi up to the trans Golgi network; coatomer complex is required for budding from Golgi membranes, and is essential for the retrograde Golgi-to-ER …
TI4896S003547	48/C03		-3.69	SPAC3H1.12c		hypothetical PHD type zinc finger protein with Lid2 complex; zinc finger protein; zf-PHD finger; BAH domain; involved in transcriptional regulation; interacts physically with SET1 complex; involved in regulation of chromatin remodeling; transcriptional regulator; Myb family (inferred from context)
TI4896S004683	39/E07	Lethal	-3.67	SPAC1834.08	mak1	putative sensory transduction histidine kinase histidine kinase; involved in signal transduction; His-to-Asp phosphorelay; non-essential; functions upstream of Spy1p; function overlapping with Mak2p and Mak3p; implicated in mitotic cell cycle control; implicated in oxidative stress response; required for the regulation of sexual development; PAC domain protein; similar to Sp mak2 and mak3; respon…
TI4896S002886	36/A03		-3.64	SPAC12G12.04	mcp60; hsp60	chaperone; involved in succinate; dehydrogenase assembly; heat shock protein 60; essential
TI4896S000706	46/A04	Lethal	-3.64	SPCC737.03c		hypothetical protein; similar to N. crassa NCU03345.1; no apparent Sc ortholog
TI4896S004604	33/G01		-3.62	SPAC27D7.03c	mei2	meiotic regulator; function facilitated by Mip1p; undergoes nucleocytoplasmic shuttling; required for commitment to meiosis; sufficient for commitment to meiosis (unphosphorylated form); rrm RNA recognition motif (3); putative splicing regulator; phosphorylated by Pat1p; phosphorylation inhibits sexual differentiation via ubiquitin proteolysis and 14-3-3 protein; no apparent Sc ortholog; RNA-bind…
TI4896S003184	47/F06		-3.62	SPAC23C4.19	spt5	involved in transcriptional regulation; involved in chromatin remodeling; nonopeptide repeat TPAWNSGSK -necessary and sufficient for binding to the capping enzymes in vivo (in a 2-hybrid assay) and in vitro; involved in tranS. cerevisiaeription elongation (regulation); involved in RNA polymerase II processivity (regulation) (implicated); chromatin structural protein; essential
TI4896S000983	23/E11	Lethal	-3.62	SPBC800.09		involved in G2/M phase checkpoint control (required)
TI4896S002368	33/H02		-3.61	SPBC887.14c	pif1; rph1	DNA helicase (5'-3'); involved in mitochondrial DNA repair (required); involved in mitochondrial recombination; rrm3-pif1 helicase homolog; essential; suppressor of the temperature-sensitive cdc24-M38; single-stranded DNA-dependent ATPase; mutant cell cycle arrest in late S/G2 at restictive temperature; mutant (pfh1-R20) hyper sensitive to MMS; possibly required for the completion of DNA replicat…
TI4896S002870	20/E04		-3.61	SPAC18B11.05		eukaryotic conserved protein
TI4896S002154	48/H11		-3.59	SPBC30D10.10c	tor1	phosphatidylinositol kinase related kinase; TOR signaling pathway; involved in starvation response (required); involved in stress response; similar to Sp SPBC216.07c
TI4896S002598	37/H08		-3.56	SPBC1861.01c	SPBC56F2.13	AT hook protein; centromeric DNA binding; involved in mitotic spindle integrity (anaphase); involved in spindle elongation
TI4896S000291	23/E03		-3.53	SPCC1020.03		CDF metal cation transporter; involved in mitochondrial iron accumulation
TI4896S003746	51/B07		-3.52	SPAC1B9.01c	SPAC15F9.03c	involved in nuclear export (predicted)
TI4896S004146	39/C11		-3.51	SPAC26A3.09	rga2	putative GTPase activating protein GTPase activator; pleckstrin homology domain; RhoGAP domain
TI4896S003001	48/H10	Lethal	-3.50	SPAC1F3.06c	spo15	involved in sporulation (required); mutant defective in spore formation; predicted coiled-coil protein; colocalizes with sad1 spindle pole body component during meiotic and vegetative growth; no apparent Sc ortholog; required for ascospore formation; essential
TI4896S001530	33/E01		-3.49	SPBC29B5.04c		conserved hypothetical; hypothetical protein
TI4896S002494	40/H11	Lethal	-3.49	SPBC211.04c	mis5; mcm6	MCM complex subunit; involved in DNA replication (initiation) (required); essential; loaded onto origins
TI4896S003948	12/B09	Lethal	-3.49	SPAC8F11.06		conserved hypothetical; hypothetical protein
TI4896S001113	28/G01	Lethal	-3.47	SPBC1706.01		src (SH3) homology domain
TI4896S002316	07/H01		-3.46	SPBC2G2.07c		Sp specific families; hypothetical protein; similar to Sp SPAC23A1.18c (paralog)
TI4896S004071	28/A01		-3.44	SPAC3G9.05		GIT repeat protein (SMART); ADP-ribosylation factor; GTPase-activating protein; involved in cell polarity; involved in conjugation; involved in conjugation with cellular fusion; predicted coided-coil region
TI4896S001559	28/E04		-3.43	SPBC21B10.03c		involved in polyadenylation
TI4896S002914	34/H01	Lethal	-3.41	SPAC31A2.10		RanGTP-binding protein; similar to Sp SPCC584.03C (paralog)
TI4896S001106	38/D05		-3.41	SPBC354.09c		protease peptidase family M28; similar transferrin receptor protein; PA (protease associated) domain; non-essential
TI4896S003371	48/A01		-3.41	SPAC57A7.03c	SPAC167.07c	putative ubiquitin transferase (ligase); ubiquitin-protein ligase (E3); HECT domain; IQ calmodulin binding motif
TI4896S004951	48/H07	Lethal	-3.40	SPAP8A3.15c	sec71; sec7a; SPAC4D7.01c	Sec7 homolog; involved in intracellular protein transport; similar to S. pombe SPAC30.01C
TI4896S003516	49/D11	Lethal	-3.40	SPAPB1A10.09		microtubule-associated protein; involved in spindle elongation (anaphase); similar to human prc1, protein regulating cytokinesis
TI4896S000857	46/G05	Lethal	-3.39	SPCC965.04c		AAA family ATPase; metallopeptidase
TI4896S003567	36/F05		-3.37	SPAC17H9.04c		RNA-binding protein; zinc finger protein; zfranBP; rrm RNA recognition motif
TI4896S000316	29/D03		-3.36	SPCC63.08c		serine/threonine protein kinase; involved in autophagy
TI4896S002523	20/B06		-3.33	SPBC26H8.02c	sec9	SNARE; involved in secretory pathway
TI4896S003848	29/D07		-3.33	SPAC7D4.04		involved in response to nitrogen starvation (required); involved in nitrogen starvation-induced sexual development (required); involved in G0 phase transition (required); interacts physically with Taz1p; predicted coiled-coil region
TI4896S004390	29/D01		-3.32	SPAC11G7.02	pub1	ubiquitin-protein ligase (E3); WW domain; HECT domain; C2 domain; WW domains are predicted to interact directly with the carboxyl-terminal domain of RNA polymerase II; involved in endocytosis; function partially overlapping with Pub2p; negatively regulates leucine uptake in response to NH(4)(+); similar to Sp SPBC16E9.11C and SPAC1805.15C
TI4896S004576	27/A05		-3.32	SPAC9E9.08	rad26	involved in DNA repair, DNA damage checkpoint, DNA replication checkpoint, G2/M transition checkpoint
TI4896S002295	49/E06	Lethal	-3.31	SPBC13A2.02		nuclear pore complex
TI4896S000200	29/H06		-3.28	SPCC962.02c	cut17; pbh1; bir1; SPCP31B10.10c	survivin; inhibitor of apoptosis domain; involved in chromosome segregation (required); involved in chromosome condensation (required); involved in spindle elongation (required)
TI4896S002145	12/C05	Lethal	-3.27	SPBC30D10.19c	SPBC13E7.11	rhomboid family protease; involved in mitochondrial signal peptide processing; similar to Sp SPBP4H10.10
TI4896S003281	35/D09	Lethal	-3.26	SPAC6F12.02	rst2	transcriptional regulator; zinc finger protein; zf-C2H2 type; regulator of sexual development; regulates ste11; regulator of gluconeogenesis; phosphorylated by protein kinase A
TI4896S001418	33/F12		-3.23	SPBC27B12.11c		transcriptional regulator; zinc finger protein; zf-fungal Zn(2)-Cys(6) binuclear cluster domain
TI4896S000773	48/C08		-3.21	SPCC576.05		leucine permease transcriptional regulator; SAC3/GANp family; actin filament-based processes; protein-nucleus export; similar to Sp SPCC70.06
TI4896S002335	49/D12	Lethal	-3.21	SPBP7E8.02	SPBPB7E8.02	putative RNA pol II specific subunit C82/hRPC62
TI4896S000206	09/E02		-3.20	SPCC1672.02c	sap1	switch-activating protein; required for efficient mat1 switching; essential; N-terminal DNA-binding domain; C-terminal dimerization domain; no apparent orthologs
TI4896S001072	38/G01		-3.19	SPBC902.01c	alp6; SPBC428.20c	gamma-tubulin complex; spindle pole body component; involved in spindle assembly checkpoint; essential
TI4896S004252	26/F06		-3.18	SPAC17G6.11c		beta-glucan synthesis-associated protein
TI4896S004032	01/F10	Lethal	-3.15	SPAC24C9.13c		mitochondrial ribosomal protein (small subunit)
TI4896S002877	26/B12	Lethal	-3.13	SPAC12G12.13c	cid14	poly(A) polymerase
TI4896S000399	45/D10	Lethal	-3.13	SPCC1259.09c		pyruvate dehydrogenase protein x component; involved in acetyl-CoA biosynthesis from pyruvate; biotin/lipoyl attachment site; e3 binding domain
TI4896S001401	15/F09		-3.10	SPBC30B4.01c	SPBC3D6.14c	conserved hypothetical; hypothetical serine-rich protein; WSC domain; involved in carbohydrate binding; proteophosphoglycan
TI4896S003253	39/B08	Lethal	-3.10	SPAC10F6.09c	psm3; smc3	putative chromosome-associated protein cohesin subunit; predicted coiled-coil protein; SMC family; involved in sister chromatid cohesion; smc1 dimerization partner; involved in DNA repair
TI4896S001506	13/E04	Lethal	-3.10	SPBC1215.01		SURF-family protein; involved in cytochrome c oxidase biogenesis
TI4896S003024	37/E05		-3.08	SPAC22F3.09c	pct1; res2; mcs1	DSp1/MBF trancription factor complex; involved in start control point of mitotic cell cycle; involved in control of meiotic start; mitotic catastrophe suppressor; APSES domain; DNA-binding protein; ankyrin repeat protein; involved in control of mitosis; partner of Cdc10p transcription factor; ankyrin repeat protein; similar to Sp SPBC336.12c and SPBC725.16
TI4896S003264	34/C12		-3.07	SPAC56E4.04c	cut6	acetyl-CoA carboxylase; carbamoyl-phosphate synthase; biotin dependent carboxylase; involved in chromosome segregation; mutant (t-s) shows defects in nuclear division; essential; involved in fatty acid biosynthesis; involved in cytokinesis; involved in cell separation
TI4896S004734	28/A04	Lethal	-3.07	SPAC20G4.03c	hri1	serine/threonine protein kinase; eIF2 kinase; possibly regulates initiation of translation by phosphorylation of eIF2alpha; similar to Sp hri2 (paralog); no apparent Sc ortholog
TI4896S000342	04/F07		-3.06	SPCC24B10.05		zinc finger protein; zf-Tim10/DDP type; involved in mitochondrial import (predicted); involved in transfer of hydrophobic inner membrane carrier proteins across the intermembrane space (predicted)
TI4896S002121	34/E09	Lethal	-3.06	SPBC15D4.02		zinc finger protein; zf-fungal Zn(2)-Cys(6) binuclear cluster domain; involved in transcriptional regulation; no apparent Sc ortholog
TI4896S003261	20/F08	Lethal	-3.05	SPAC56E4.01c	SPAC10F6.17c	serine-threonine protein phosphatase
TI4896S004639	49/C12	Lethal	-3.05	SPAC12B10.12c	rhp41; rhp4a	involved in DNA repair; involved in nucleotide-excision repair; XP-C family; repairosome; similar to Sp rhp42 (paralog)
TI4896S000845	30/C10	Lethal	-3.04	SPCC1840.03	sal3; pse1	importin beta; armadillo repeat protein; HEAT repeat; Ran binding protein; deletion mutant results in cell cycle delay; deletion mutant results in mislocalization of Cdc25p
TI4896S000881	23/H05		-3.04	SPCC70.03c		proline dehydrogenase; involved in proline catabolism; involved in glutamate biosynthesis; proline dehydrogenase activity
TI4896S000143	38/A10		-3.02	SPCC306.03c	cnd2	condensin subunit; XCAP-H; essential; involved in chromosome condensation (required)
TI4896S004549	21/H12	Lethal	-3.02	SPAC1527.03		RNA-binding protein; LA-related
TI4896S005015	36/A07		-3.01	SPAC869.01		glutamyl tRNA aminotransferase subunit; no apparentSc ortholog
TI4896S001044	23/D02		-3.00	SPBC582.03	cdc13	G2/mitotic-specific cyclin; involved in control of mitosis, regulation of CDK activity, DNA damage checkpoint, DNA replication checkpoint; essential
TI4896S004080	40/H07	Lethal	-3.00	SPAC3G9.14	sak1	RFX DNA-binding protein; positively regulates cyclic AMP-dependent protein kinase -mediated exit from mitotic cell cycle
TI4896S004657	11/B01		-2.99	SPAC1635.01		voltage-dependent anion-selective channel
TI4896S003374	43/C04		-2.98	SPAC167.04		conserved hypothetical; conserved hypothetical protein; possibly fungal specific
TI4896S003521	41/E08		-2.98	SPAPB1A10.14		F-box protein (inferred from context)
TI4896S003921	30/C01	Lethal	-2.98	SPAC1B2.01	crm1; caf2; SPAC1805.17	chromosome region maintenance protein 1; importin-beta family; involved in nuclear export; bridges the interaction between Rev and the nuclear pore complex during nuclear export; cell cycle-dependent expression; Leptomycin B inactivates CRM1/exportin 1 by covalent modification at a cysteine residue in the central conserved region; involved in nuclear export of the small ribosomal subunit; involve…
TI4896S000967	26/F08	Lethal	-2.97	SPBC660.15		RNA-binding protein; rrm RNA recognition motif; mRNA cleavage factor complex; involved in polyadenylation
TI4896S002680	34/D07	Lethal	-2.97	SPBC16C6.02c		involved in intracellular protein transport
TI4896S003455	24/H09		-2.97	SPAC664.14		Amt ammonium transporter
TI4896S002994	28/E01		-2.96	SPAC3H8.09c		RNA-binding protein; rrm RNA recognition motif; involved in packaging pre-mRNAs into ribonucleoprotein structures amenable to efficient nuclear RNA processing (SGD)
TI4896S001102	38/D04	Lethal	-2.95	SPBC354.05c		DNA-binding protein; involved in transcriptional regulation; myc family; basic helix-loop-helix (bHLH); membrane-tethered transcription factor; no apparent Scortholog
TI4896S001263	47/H12		-2.95	SPBP35G2.14		conserved hypothetical; RNA-binding protein; rrm RNA recognition motif; similar to Sp SPBP56F2.08 (paralog)
TI4896S001690	33/H06		-2.95	SPBP23A10.01c	pmc1; SPBC1A4.10c	RNA polymerase II holoenzyme component; mediator complex subunit; involved in regulating RNA polymerase II activity
TI4896S001922	38/C08	Lethal	-2.94	SPBC365.15	alp4	spindle pole body component; gamma tubulin complex; involved in G1 progression (required); involved in spindle assembly checkpoint; involved in cytokinesis
TI4896S002317	47/H11		-2.93	SPBC2G2.08	ade9	C-1-tetrahydrofolate synthase; methylenetetrahydrofolate dehydrogenase; methylenetetrahydrofolate cyclohydrolase; formyltetrahydrofolate synthetase; involved in purine biosynthesis
TI4896S001332	33/D12	Lethal	-2.92	SPBC409.07c	spc2; wis1; smf2	serine/threonine protein kinase; MAP kinase kinase (MAPKK); Spc1 SAPK cascade; involved in cell cycle progression; involved in mitotic control; dosage dependent regulator of mitosis
TI4896S000404	45/G09	Lethal	-2.91	SPCC1259.13	chk1; rad27	serine/threonine protein kinase; involved in DNA repair; involved in DNA damage checkpoint; interacts physically with Ded1p
TI4896S003666	46/D11		-2.91	SPAC18G6.10		hypothetical protein
TI4896S000075	25/B12		-2.89	SPCC548.05c		zinc finger protein; zf-C3HC4 type (RING finger); ubiquitin ligase (E3)
TI4896S001890	48/G08		-2.85	SPBC12C2.10c	pst1; SPBC21D10.01c	involved in chromatin silencing; involved in histone deacetylation; sin3 family corepressor; similar to Sp pst2 (paralog)
TI4896S002541	09/B03		-2.84	SPBC3B9.04		conserved hypothetical; putative methyltransferase
TI4896S000893	44/H08	Lethal	-2.84	SPCC1827.03c		long-chain fatty acid transporter; involved in lipid transport
TI4896S002602	28/A10		-2.84	SPBC1861.05		pfkB family carbohydrate kinase; no apparent Sc ortholog
TI4896S000250	35/C03		-2.84	SPCC16C4.07	scw1	RNA-binding protein; involved in septation and regulation of septum formation; regulates cell wall structure; rrm RNA recognition motif
TI4896S003284	35/E08	Lethal	-2.83	SPAC6F12.05c	tnr3	thiamine pyrophosphokinase (thiamine kinase); regulator of thiamine metabolism; regulator of phosphate metabolism, mating, and growth; Nudix family hydrolase
TI4896S002156	43/C09		-2.83	SPBC30D10.08		involved in mitochondrial genome maintenance; involved in DNA repair
TI4896S002116	33/E04		-2.81	SPBC2D10.18	abc1	involved in assembly of the ubiquinol cytochrome-c reductase complex (cytochrome bc1 complex); functionally complements Sc ABC1
TI4896S001677	23/B07		-2.80	SPBC1E8.03c		hypothetical protein; sequence orphan
TI4896S000249	22/E02		-2.80	SPCC16C4.06c		tRNA pseudouridylate synthase
TI4896S002219	41/A10		-2.77	SPBC21.06c	cdc7	serine/threonine protein kinase; SIN component; involved in septation (required); involved in cytokinesis (required); essential
TI4896S002077	37/C10	Lethal	-2.77	SPBC1703.03c		armadillo repeat protein
TI4896S000573	31/B06		-2.76	SPCC162.08c		nuclear pore complex associated; similar to Sp SPAC1486.04c; predicted coiled-coil protein
TI4896S002481	21/H03	Lethal	-2.76	SPBPJ758.01	SPBC23E6.01c	RNA-binding protein; rrm RNA recognition motif; similar to Sp csx1
TI4896S002281	37/C05		-2.76	SPBC3B8.12	SPBC11C11.11c	DEAD/DEAH box helicase
TI4896S002133	46/C03		-2.75	SPBC15D4.14	taf73	transcription initiation factor TFIID subunit; WD repeat protein; suppresses defects in the anaphase-promoting complex; essential; overexpression suppresses the anaphase blocking mutation cut9; possible role of WD repeat-containing TAFs in the expression of genes involved in progression through the M phase of the cell cycle
TI4896S001178	31/B11		-2.74	SPBC577.06c		phosphatidylinositol 4-kinase
TI4896S003642	47/D11		-2.74	SPAC13F5.01c	msh1; SPAC23C11.18c	MutS family; ATP binding activity; involved in DNA repair; involved in mismatch repair
TI4896S002928	35/C10		-2.74	SPAC23E2.01	fep1; gaf2	iron-sensing transcriptional regulator; zinc finger protein; zf-GATA type; involved in the regulation of the iron transporter gene expression; expression constitutive irrespective of the nitrogen source
TI4896S001971	35/G02		-2.73	SPBC3E7.05c		hypothetical protein
TI4896S004266	38/A12		-2.72	SPAC1142.08	SPAC8C9.01	involved in transcriptional activation; fork head domain; FHA domain (phosphopeptide binding)
TI4896S003544	46/E10	Lethal	-2.71	SPAC3H1.09c		amino acid transporter
TI4896S001128	09/E10		-2.68	SPBC839.14c		methyltransferase
TI4896S003868	20/H07		-2.68	SPAC644.07		AAA family ATPase; involved in the expression of functional Rieske iron-sulfur protein; involved in iron metabolism; chaperone; involved in mitochondrial respiratory chain complex III assembly; human disease GRACILE syndrome ortholog
TI4896S002083	42/G03		-2.67	SPBC1703.09		predicted coiled-coil protein; sequence orphan
TI4896S001660	09/B10		-2.67	SPBC16E9.03c		conserved hypothetical
TI4896S001830	23/A01		-2.66	SPBC12D12.05c		mitochondrial carrier; involved in mitochondrial transport; localization mitochondrial membrane; unknown specificity; Graves disease carrier protein homolog
TI4896S000449	39/C12		-2.66	SPCC645.06c	rgf3	hypothetical Rho1 GDP-GTP exchange protein; non-essential; interacts genetically with septins; rho1 gdp-GTP exchange protein; RhoGEF; pleckstrin homology domain; similar to Sp SPCC645.07 and and SPAC1006.06; divergently orientated to rgf1
TI4896S004313	37/C02		-2.65	SPAC1556.02c	sdh1	succinate dehydrogenase (ubiquinone); FAD binding domain; flavoprotein subunit; involved in tricarboxylic acid cycle; involved in mitochondrial electron transport, succinate to ubiquinone; involved in succinate metabolism; succinate dehydrogenase (ubiquinone) activity
TI4896S004462	36/C03		-2.65	SPAC25B8.08		hypothetical protein
TI4896S003456	37/B02		-2.65	SPACUNK12.01	SPAC664.15	conserved hypothetical; WD repeat protein
TI4896S002521	36/E02		-2.64	SPBC1677.03c		putative threonine dehydratase precursor; threonine ammonia-lyase activity
TI4896S000180	29/G01	Lethal	-2.63	SPCC970.08		inositol polyphosphate kinase
TI4896S003693	10/D07		-2.63	SPAC4G9.19		DNAJ domain protein
TI4896S003927	29/C02		-2.62	SPAC3F10.02c	trk1	potassium transporter; TrkH domain; similar to Sp trk2 (paralog)
TI4896S001628	26/B05	Lethal	-2.61	SPBC9B6.11c		cr4p-like; RNA nuclease; involved in RNA processing; involved in 3' end processing of 5.8S rRNA (final step)
TI4896S003280	29/A12		-2.60	SPAC6F12.01	SPAC1565.08	AAA family ATPase; Cdc48-Ufd1-Npl4 complex component (putative); involved in ubiquitin-dependent proteolysis; involved in proteasomal processing; involved in the recognition of polyubiquitin-tagged proteins; transitional ER ATPase
TI4896S004907	29/C08	Lethal	-2.59	SPAC14C4.05c		conserved hypothetical; hypothetical protein; ATP/GTP-binding site motif
TI4896S004784	27/E11		-2.59	SPAC1B3.04c		GTP binding protein; Elongation factor Tu family
TI4896S002135	29/B01		-2.57	SPBC13E7.01	cwf22; SPBC15D4.16	eukaryotic conserved protein; MIF4G domain; MA3 domain; complexed with Cdc5p; human ortholog fSAPb has been isolated with functional spliceosomes
TI4896S003653	48/G01	Lethal	-2.57	SPAC1783.05	hrp1; chd1	chromatin remodeling ATPase; involved in transcription termination; involved in chromosome segregation; involved in mitosis; DNA-binding domain binds AT-rich stretches; DEAD/DEAH box helicase; SNF2 family; helicase C-terminal domain; similar to Sp hrp3
TI4896S002087	13/B04		-2.56	SPBC1703.13c		mitochondrial carrier; phosphate transporter
TI4896S002071	13/C06		-2.56	SPBP4H10.18c		sequence orphan; hypothetical protein; predicted coiled-coil region
TI4896S001923	10/H01		-2.55	SPBC365.16		hypothetical protein; sequence orphan
TI4896S004022	05/A03		-2.54	SPAC24C9.16c	cox8	putative cytochrome c oxidase VIIC subunit
TI4896S000760	30/B01		-2.53	SPCC1739.11c	cdc11	involved in septation; SIN component; leucine-rich repeat protein; localizes components of the SIN to the SPB; phosphoprotein; essential
TI4896S002151	39/E10		-2.53	SPBC30D10.13c	pdb1	pyruvate dehydrogenase e1 component beta pyruvate dehydrogenase e1 component (beta subunit); involved in acetyl-CoA biosynthesis from pyruvate; pyruvate dehydrogenase (lipoamide) activity
TI4896S003258	45/C11	Lethal	-2.53	SPAC10F6.14c		conserved hypothetical; hypothetical protein
TI4896S000689	26/H12		-2.52	SPCC1223.03c	gut2	glycerol-3-phosphate dehydrogenase
TI4896S001692	04/B12		-2.52	SPBP23A10.03c		possibly related to gluconeogenesis
TI4896S000134	43/G12		-2.50	SPCC1682.09c		mitochondrial carrier; involved in mitochondrial transport; unknown specificity
TI4896S004018	37/A11	Lethal	-2.49	SPAC1786.02		lysophospholipase; similar to Sp SPAC977.09c and SPAC1A6.03c and SPCC1450.09c and SPBC1348.10c and SPAC1A6.04c; GPI anchored protein (pers. comm. Birgit Eisenhaber); glycoprotein
TI4896S004521	30/C06	Lethal	-2.49	SPAC25G10.07c	cut7	kinesin-like protein; kinesin family; BimC subfamily
TI4896S004874	03/E11	Lethal	-2.48	SPAC29A4.05		calmodulin; EF hand motifs; calcium binding protein
TI4896S004278	38/H04		-2.48	SPAC8C9.14	prr1	heat shock transcription factor; involved in oxidative stress response (implicated); essential; involved in expression of oxidative stress genes (ctt1 and trr1) (required); involved in expression of sexual development genes (required); response regulator receiver domain
TI4896S001809	08/G02		-2.48	SPBC21H7.06c		conserved eukaryotic protein
TI4896S001231	41/B03		-2.48	SPBC216.05	rad3	ATR (ATM) checkpoint kinase; involved in DNA repair; involved in DNA damage checkpoint; involved in DNA replication checkpoint; involved in meiotic recombination
TI4896S004190	34/G01	Lethal	-2.48	SPAC3A11.07		NADH-dehydrogenase
TI4896S004389	45/C12		-2.47	SPAC11G7.01		Sp specific families; glycoprotein; serine-rich protein; possibly Sp specific
TI4896S000774	23/B09		-2.47	SPCC576.06c		tyrosine-tRNA ligase; involved intyrosyl-tRNA aminoacylation; tyrosine-tRNA ligase activity
TI4896S004164	45/B02	Lethal	-2.46	SPAC959.03c		ribonucleoprotein (RNP) complex; WD repeat protein; processome component; involved in rRNA processing
TI4896S004225	26/A12	Lethal	-2.46	SPAC1B1.01	rdp1	transcription factor; zinc finger protein; zf-C2H2 type; regulator of rhp51 whose promoter has damage responsive elements (DREs); essential; no apparent orthologs
TI4896S002238	20/C10		-2.44	SPBC25H2.08c		involved in mitochondrial RNA splicing
TI4896S004487	19/A08		-2.42	SPAC1F7.07c	fip1	iron permease
TI4896S004842	37/G06		-2.42	SPAC2E12.02	hsf1; hsft; hsf	heat shock induced tranSpriptional activator; essential; required for growth; stress response activator
TI4896S000876	30/H08		-2.42	SPCC1494.07		conserved hypothetical protein
TI4896S000300	35/A09	Lethal	-2.42	SPCC1393.08		zinc finger protein; zf-GATA type; transcriptional regulator
TI4896S003298	28/H11		-2.41	SPAC19E9.02	fin1	serine/threonine protein kinase; NIMA-related kinase; involved in chromatin condensation (promotion); involved in spindle formation (regulation); involved in cytokinesis (required); involved in septation (required); expression peaks at M-G1 phase; regulated by PBF transcription complex; involved in the asymmetry of SIN inactivation non-essential
TI4896S000018	24/B07		-2.40	SPCC613.01	SPBC757.14; SPCC757.14	transporter; unknown specificity; similar to Sp SPCC613.02 and SPCC330.07c and SPCC757.11c (paralogs); conserved in A. thaliana; no apparent Sc ortholog
TI4896S002224	27/D05	Lethal	-2.40	SPBC19F8.03c		ENTH domain protein; clathrin coat assembly protein; actin cortical patch component
TI4896S000542	51/E08		-2.38	SPCC188.02	par1	protein phosphatase PP2A, subunit B'; involved in cytokinesis; involved in cellular morphogenesis; involved in stress tolerance; implicated in the regulation of the septation initiation network
TI4896S003761	05/E02		-2.37	SPAC6B12.13		hypothetical protein; Sc YFR003C may physically interact with Glc7p and Ppz1p; Sc YFR003C is null lethal
TI4896S002425	33/G03		-2.37	SPBC25D12.03c	mcm7	MCM complex subunit; involved in DNA replication (initiation) (required); essential
TI4896S003140	27/F08	Lethal	-2.37	SPAC222.09		involved in the regulation of transcriptional elongation, 3' end formation; interacts physically with Rpb7p; RNA-binding protein
TI4896S001350	35/E05		-2.35	SPBC4.02c		hypothetical protein
TI4896S004458	17/H07		-2.35	SPAC25B8.04c		involved in mitochondrial mRNA maturation
TI4896S002513	09/F12		-2.34	SPBC1604.07	atp4	F0-ATPase; ATP synthesis coupled proton transport; mammalian subunit b
TI4896S001471	49/A07	Lethal	-2.33	SPBC691.04	pi031; SPACTOKYO_453.03c	DEAD/DEAH box helicase; ATP-dependent; RNA helicase; similar to Sp SPAC1F7.02C (paralog)
TI4896S002129	24/A05	Lethal	-2.33	SPBC15D4.10c		nuclear rim protein; required for the correct termination of microtubule growth at cell ends in interphase; zinc finger protein; zf-CCCH type; similar to A. thaliana f1b16.12; no apparent S. cerevisiae ortholog
TI4896S000421	46/D05		-2.29	SPCC4B3.03c		conserved hypothetical protein; involved in mitochondrial maintenance; CBS domain protein; DUF21
TI4896S002237	04/F05		-2.28	SPBC25H2.09		hypothetical protein; sequence orphan
TI4896S004626	24/C03		-2.28	SPAC637.13c		hypothetical protein; pleckstrin homology domain
TI4896S002512	25/H09		-2.28	SPBC1604.08c	imp1	importin alpha subunit; armadillo repeat protein; similar to Sp cut15 (paralog); overexpression results in cell cycle defects
TI4896S002618	25/A11		-2.28	SPBC14F5.12c		DNA-binding protein; centromere binding protein; involved in chromosome segregation; CENP-B homolog; CENP-B box; C-terminal dimerization domain; disruption of CENP-B homologs causes a decrease in heterochromatin-specific modifications of histone H3; Sp CENP-B homologs are functionally redundant at centromeres; CENP-B homologs act as site-specific nucleation factors for the formation of centromeri…
TI4896S002464	01/G09		-2.27	SPBC21C3.04c		mitochondrial ribosomal protein L34
TI4896S001621	21/C03		-2.27	SPBC9B6.04c		elongation factor Tu; binds GTP and an aminoacyl tRNA
TI4896S000616	26/F02		-2.27	SPCC1902.02	SPCC663.16c	conserved protein; putative ketopantoate reductase
TI4896S002340	33/B10	Lethal	-2.26	SPBC1105.04c	abp1; cbp1	ARS binding protein; binds to centromeric DNA sequences; involved in chromosome segregation (mitotic) (required); involved in chromosome segregation (meiotic); CENP-B homolog; no apparent Sc ortholog; CENP-B box; C-terminal dimerization domain; disruption of CENP-B homologs causes a decrease in heterochromatin-specific modifications of histone H3; Sp CENP-B homologs are functionally redundant at …
TI4896S000757	09/H02		-2.26	SPCC1739.08c		short chain dehydrogenase; involved in sorbitol utilization; similar to Sp SPAC22A12.17C and SPAC8E11.10; no apparent Sc ortholog
TI4896S001904	40/G01	Lethal	-2.25	SPBC557.03c	pim1; dcd1; ptr2	GDP/GTP exchange factor (RanGEF); involved in mitotic checkpoint; involved in metaphase-anaphase transition (required); regulates mitotic checkpoint; regulates chromotin decondensation; involved in nuclear export; regulates mRNA processing and transport; poly(A)+ RNA transport protein; RCC repeats (7)
TI4896S004578	25/A09	Lethal	-2.25	SPAC9E9.10c	cbh1; cbh	centromere k-type repeat binding protein; CENP-B homolog; involved in chromosome segregation; CENP-B box; C-terminal dimerization domain; disruption of CENP-B homologs causes a decrease in heterochromatin-specific modifications of histone H3; Sp CENP-B homologs are functionally redundant at centromeres; CENP-B homologs act as site-specific nucleation factors for the formation of centromeric heter…
TI4896S004950	46/C12		-2.21	SPAP8A3.14c		hypothetical protein; involved in mitochondrial metabolism
TI4896S003961	22/H01		-2.21	SPACUNK4.10		2-hydroxyacid dehydrogenase
TI4896S002583	01/F12		-2.18	SPBC1347.11		hypothetical protein
TI4896S000740	31/A09		-2.18	SPCC290.03c		nucleoporin
TI4896S004982	34/C01		-2.18	SPAC29B12.07	sec16	multidomain vesicle coat component; involved in ER to Golgi transport; involved in vesicle formation
TI4896S003150	45/F11	Lethal	-2.17	SPAC821.04c	cid13	poly(A) polymerase; regulates ribonucleotide reductase mRNA; cid1-related; caffeine induced death protein; nucleotidyltransferase; non-essential; no apparent Sc ortholog
TI4896S000027	20/E06		-2.16	SPCC613.10	qcr2	peptidase family M16; ubiquinol cytochrome c reductase complex; cytochrome bc1 complex; respiratory complex III; core protein II
TI4896S000303	06/E07		-2.16	SPCC1393.11		hypothetical protein; sequence orphan
TI4896S002910	26/A06		-2.15	SPAC31A2.06		sequence orphan; hypothetical protein
TI4896S003210	30/H11	Lethal	-2.14	SPAC56F8.02		AMP binding enzyme; similar to Sp SPAC22F3.04
TI4896S002592	19/A12		-2.14	SPBC56F2.05c		transcriptional regulator; zinc finger protein; zf-fungal Zn(2)-Cys(6) binuclear cluster domain; similar to N. crassa 3H10.90; no apparent Sc ortholog
TI4896S002350	26/F12		-2.14	SPBC1105.14		zinc finger protein; zf-C2H2 type; involved in transcriptional activation
TI4896S000141	06/C02		-2.13	SPCC306.01	rpt4; SPCC1682.16	19S proteasome regulatory subunit; AAA family ATPase
TI4896S002332	33/H10		-2.12	SPBC1718.06	msp1	involved in mitochondrial DNA maintenance (required); human homolog OPA1 is mutated in dominant optic atrophy; dynamin family; GTPase; interacts physically with Nim1p
TI4896S004595	24/D12	Lethal	-2.12	SPAC17C9.06		conserved protein; probably outer membrane by similarity; Sc -null mutant is essential for mitotic growth forming microcolonies of several hundred cells with heterogeneous bud sizes
TI4896S003335	06/A04	Lethal	-2.12	SPAC3A12.16c		mitochondrial inner membrane pre-sequence translocase complex; involved in mitochondrial translocation
TI4896S003480	25/D11		-2.12	SPAC1610.04		sequence orphan; hypothetical protein
TI4896S001527	33/C12		-2.10	SPBC29B5.01	atf1; mts1; sss1; gad7	transcription factor; involved in sexual development (required); involved in entry into stationary phase(required); involved in G1 arrest; involved in gene expression under nitrogen starvation (required); heterodimeric transcriptional activator; involved in meiotic recombination; binds M26 recombination hotspot; involved in oxidative stress response; target for the Sty1p stress-activated MAP kina…
TI4896S000701	27/A11		-2.09	SPCC297.03	ssp1	serine/threonine protein kinase; deletion mutant sensitive to multiple stresses; acts in a different pathway to Spc1p
TI4896S003115	28/A05		-2.08	SPAC1687.05	pli1	septin interacting protein homolog; zinc finger protein; zf-MIZ; SAP domain; DNA-binding protein; septin-sumoylation; possibly interacts with ubiquitin conjugating enzyme
TI4896S000850	35/C04		-2.07	SPCC1840.08c		glycoprotein; thioredoxin related glycoprotein; similar to Sp SPAC959.05C and SPBC3D6.13C
TI4896S004871	27/D01		-2.07	SPAC29A4.08c	prp19; cwf8	ubiquitin-protein ligase (E4); involved in mRNA splicing; WD repeat protein
TI4896S003438	05/C01		-2.06	SPAC824.06		DNAJ domain protein
TI4896S001520	43/E04		-2.05	SPBC83.13		mitochondrial carrier; involved in mitochondrial transport; unknown specificity
TI4896S004627	47/C05		-2.05	SPAC637.14	SPAC31F12.01	zds family; involved in cell cycle
TI4896S004368	36/A06		-2.04	SPAC323.04		non-transporter with ATP binding cassette
TI4896S004976	31/A05		-2.03	SPAC29B12.01	SPAC3G6.12	SNF2 family; helicase C-terminal domain; DEAD/DEAH box helicase
TI4896S001985	33/H07		-2.03	SPBC4F6.06	kin1	serine/threonine protein kinase; involved in cell polarity (implicated); involved in cellular morphogenesis
TI4896S004764	38/D09		-2.02	SPAC19B12.05c	fcp1	serine phosphatase; TFIIF-interacting C-terminal domain phosphatase; BRCT domain; NLI interacting factor family; metal-dependent phosphotransferase; interacts physically with Rpb4p; CTD phoshphatase; essential
TI4896S002427	33/C08		-2.02	SPBC25D12.05	trm1	N2,N2-dimethylguanosine tRNA methyltransferase
TI4896S002006	48/F10		-2.01	SPBC336.07	sfc3	RNA polymerase III transcription factor (TFIIIC subunit); AT hook protein; homology to B box binding subunit
TI4896S001670	21/H09		-2.00	SPBC16E9.13		serine/threonine protein kinase
TI4896S001105	47/A04		-2.00	SPBC354.08c		conserved hypothetical; hypothetical protein; DUF221; involved in sporulation; non-essential
TI4896S000682	38/A06		-1.99	SPCC285.13c		hypothetical protein; sequence orphan
TI4896S003992	50/C09		-1.99	SPAPB1A11.02		esterase/lipase; no apparent Sc ortholog
TI4896S001610	22/E10		-1.98	SPBC18H10.11c		hypothetical protein; PPR domains; no apparent Sc ortholog
TI4896S004985	05/C04	Lethal	-1.98	SPAC29B12.11c		putative orthologue of human WW domain binding protein-2
TI4896S003899	46/G11		-1.98	SPAC6F6.13c		conserved protein; similar to Sp SPAC607.08c
TI4896S001264	30/C02		-1.97	SPBC146.01	SPBP35G2.15	RNA polymerase II holoenzyme component; mediator complex
TI4896S004467	19/A07		-1.97	SPAC25B8.13c	isp7	2 OG-Fe(II) oxygenase superfamily; involved in sexual differentiation; no apparent Sc ortholog
TI4896S002714	38/B02		-1.96	SPBC1289.10c		transcriptional regulator; similar to N. crassa Som1; similar to Sp SPCC70.01; LisH domain (SMART); single-stranded DNA binding protein (SSDP) (inferred from context)
TI4896S002582	33/D07		-1.96	SPBC1347.10	cdc23	MCM-associated protein; involved in DNA replication (initiation) (required); essential; OB-fold nucleic acid binding domain; interacts physically with Mcm4p; interacts physically with Mcm5p; interacts physically with Mcm6p; interacts physically with Orc1p; interacts physically with Orc2p; interacts physically with Orc5p; interacts physically with Orc6p
TI4896S002682	16/B02		-1.96	SPBC16C6.04		sequence orphan; hypothetical protein
TI4896S002973	26/H01		-1.96	SPAC2F7.10		palmitoyltransferase activity; 6 ankyrin repeat protein; zinc finger protein; zf-DHHC type; AKR/ZDHHC17 subfamily; palmitoyltransferase specific for casein kinase 1 (By similarity)
TI4896S002588	19/H10		-1.95	SPBC56F2.09c	arg5	carbamoyl-phosphate synthase; arginine specific; involved in arginine biosynthesis; involved in glutamate catabolism; carbamoyl-phosphate synthase (glutamine-hydrolysing) activity
TI4896S001025	16/E11		-1.95	SPBC106.03		hypothetical protein; sequence orphan; non-essential
TI4896S002453	46/C09		-1.95	SPBC31F10.11c	cwf4; syf3	hypothetical protein; involved in mRNA splicing; complexed with Cdc5p; 40S snRNP-containing complex
TI4896S000252	48/A05		-1.94	SPCC16C4.09	sts5	RNB-like protein; ribonuclease; essential; involved in cell polarity (maintenance) (required); interacts (functionally) with protein kinase C; interacts genetically with osmosensing MAP-kinase pathway; target of the inhibitor staurosporine
TI4896S003019	48/G10		-1.94	SPAC1D4.14	SPAC22F3.14c	THO complex component; involved in mRNA export; involved in transcription by RNA polymerase II
TI4896S001592	39/E12		-1.94	SPBC1D7.02	scr1; SPBC1D7.02c	glucose mediated repressor of Inv1 transcriptional regulator; zinc finger protein; zf-C2H2 type; glucose mediated repressor of inv1 and fbp1
TI4896S003104	34/A03		-1.93	SPAC23G3.12c		PDZ domain protein; trypsin domain; serine protease; similar to Sp SPBC1685.05
TI4896S000803	05/H03		-1.93	SPCC1620.03		hypothetical protein; sequence orphan
TI4896S003641	24/E06	Lethal	-1.92	SPAC23C11.17		conserved eukaryotic protein; predicted CK2 and PKC phosphorylation site (T/S)RRE
TI4896S004916	37/C03		-1.92	SPAC14C4.14	atp1	F1-ATPase (alpha subunit); ATP synthesis coupled proton transport
TI4896S001460	40/C05		-1.92	SPBC17A3.03c	pi043	similar to protein tyrosine phosphatases (PTPs)
TI4896S001354	21/E02		-1.91	SPBC4.06		acid phosphatase; no apparent Sc ortholog
TI4896S001240	45/A06		-1.91	SPBC646.08c		oxysterol binding protein; involved in ergosterol biosynthesis; similar to Sp SPBC354.07 and SPBC1271.12 and SPCC23B6.01
TI4896S003479	38/D02		-1.91	SPAC1610.03c	crp79; meu5	RNA-binding protein; polyadenylate binding; meiotic expression upregulated; involved in mRNA export; rrm RNA recognition motif; non-essential; Crp79p nuclear import depends on the Ran system; similar to Sp SPAC343.07; no apparent Scortholog
TI4896S002826	25/G06	Lethal	-1.91	SPAC13G6.08		conserved hypothetical; WD repeat protein; Cdc20/Fizzy family; similar to Sp SPCC1620.04C; no apparent Sc ortholog
TI4896S003445	42/C08		-1.90	SPAC664.04c	rps1602; rps16; rps16-2	40S ribosomal protein S16
TI4896S001414	32/D05		-1.90	SPBC27B12.07		conserved hypothetical protein
TI4896S000411	25/H10		-1.89	SPCC4B3.13		MatE family transporter; unknown specificity; similar to Sp SPAC323.07c and SPAC11D3.06
TI4896S003533	43/F12		-1.89	SPAP14E8.04		zinc metallopeptidase; peptidase family M48
TI4896S003552	20/C03		-1.87	SPAC9G1.04	oxa101; oxa1; oxa1-1; cox18; oxa1sp1	respiratory complex biogenesis protein; cytochrome c oxidase assembly protein; localization mitochondrial inner membrane; similar to Sp oxa102 (paralog); essential with oxa102
TI4896S004635	50/G03		-1.87	SPAC12B10.08c		hypothetical protein; UPF0021 domain; similar to E. coli cell cycle protein mesJ; no apparent orthologs; related to Sp SPBC2G5.03
TI4896S000724	38/H05		-1.87	SPCC18.04	pof6	F-box protein; essential; involved in cytokinesis; involved in cell separation (required); involved in endocytic membrane traffic and recycling out of an early endosome
TI4896S004391	16/E04		-1.87	SPAC11G7.03	idh1; glu3	isocitrate dehydrogenase (NAD+) subunit 1; involved in tricarboxylic acid cycle; involved in isocitrate metabolism; involved in glutamate biosynthesis; isocitrate dehydrogenase (NAD+) activity
TI4896S003300	28/D01		-1.86	SPAC57A10.02	cdr2	serine/threonine protein kinase; invovled in G2/M progression (regulation); involved in cytokinesis (regulation); involved in mitotic start (regulation); involved in cell separation; nim1 family
TI4896S002063	18/G01		-1.86	SPBP4H10.10		rhomboid family protease; involved in mitochondrial signal peptide processing (putative); similar to Sp SPBC13E7.11
TI4896S001631	30/B03		-1.85	SPBC28E12.03	rga4	GTPase activator; RhoGAP domain
TI4896S002798	22/F10		-1.85	SPAC11D3.10		aminotransferase; similar to Sp SPCC777.03c (paralog); cysteine desulfurase; no apparent Sc ortholog
TI4896S002210	49/B05	Lethal	-1.85	SPBC776.15c		dihydrolipoamide S-succinyltransferase (e2 component of oxoglutarate dehydrogenase complex); involved in 2-oxoglutarate metabolism; involved in tricarboxylic acid cycle; dihydrolipoamide S-succinyltransferase activity
TI4896S003519	50/H08	Lethal	-1.85	SPAPB1A10.12c		D-arabinono-1,4-lactone oxidase
TI4896S002387	17/F05		-1.84	SPBC317.01		MADS-box transcription factor; SRF-type transcription factor; involved in cell wall biosynthesis; deletion mutant galactomannans deficient for pyruvylated galactose-beta-1, 3-galactose-alpha-1,2-pyruvate (Pv) (pers. comm. Robert Trimble)
TI4896S004074	11/B09		-1.84	SPAC3G9.08	png1	zinc finger protein; zf-PHD finger; involved in transcriptional regulation; histone acetyltransferase complex; shares significant sequence identity with the human candidate tumour suppressor p33 (ING1) in their C-terminal regions; involved in chromatin mediated transcriptional regulation; divergent orientation to hda1-may share regulatory region
TI4896S000148	15/E01		-1.84	SPCC306.08c		malate dehydrogenase; involved in malate metabolism; involved in tricarboxylic acid cycle; L-malate dehydrogenase activity
TI4896S003769	29/E08		-1.83	SPAC32A11.03c		homeobox protein; putative transcription factor
TI4896S003286	11/F06	Lethal	-1.83	SPAC6F12.07		mitochondrial outer membrane translocase complex; involved in mitochondrial outer membrane protein import; mitochondrial import receptor; involved in the organization of Tom40p dimers into TOM structures
TI4896S000319	06/H06		-1.83	SPCC63.12c		20S proteasome component (beta 3)
TI4896S000524	29/E12		-1.83	SPCC622.16c		zinc finger protein; zf-PHD finger (inferred from context); jmjC domain; involved in establishment and/or maintenance of chromatin architecture; involved in transcriptional regulation
TI4896S000500	48/H12		-1.83	SPCC338.01c	ags1; mok1; SPCC17A7.01; SPCC1281.01	a-1,3-glucan synthase; alpha glucan synthase; glycosyl transferase family 1; essential; involved in cell wall biosynthesis (required); similar to Sp MOK11 and MOK12 and MOK13 and MOK14
TI4896S001343	12/D02		-1.83	SPBC409.18		phosphatidic acid phosphatase
TI4896S000359	49/F06	Lethal	-1.83	SPCPB16A4.01	mip1; SPCC24B10.22	mitochondrial DNA polymerase gamma, mitochondrial
TI4896S000267	47/A06		-1.83	SPCC18B5.03	wee1	serine/threonine protein kinase; dual specificity protein kinase; mitotic inhibitor; CDK tyrosine kinase; negatively regulates G2/M transition; phosphorylates Cdc2p; overexpression results in cell cycle defects; involved in control of mitosis; involved in DNA damage checkpoint; involved in DNA replication checkpoint
TI4896S002088	33/H03		-1.82	SPBC1703.14c	top1	DNA topoisomerase activity; non-essential; involved in establishment and/or maintenance of chromatin architecture
TI4896S003875	17/B11	Lethal	-1.82	SPAC644.14c	rad51; rhp51	RecA-like protein; involved in DNA repair; interacts physically with Rad22p; involved in meiotic recombination; involved in meiotic gene conversion (required); AAA family ATPase; helix-hairpin-helix; DNA-binding protein; telomere binding; involved telomere maintenance (in the absence of Ku) (required); AAA family ATPase
TI4896S003816	49/H08		-1.82	SPAC4A8.11c	fas2; lsd1	alpha fatty acid synthase (subunit alpha)
TI4896S000879	47/D07		-1.82	SPCC70.01	SPCC1494.10	transcriptional regulator; similar to N. crassa Som1; similar to Sp SPBC1289.10c; LisH domain (SMART); single-stranded DNA binding protein (SSDP) (inferred from context)
TI4896S001073	47/G03		-1.81	SPBC902.02c	ctf18; chl12	AAA family ATPase; DNA replication factor C complex; involved in chromosome segregation; non-essential; involved in meiotic recombination; involved in telomere maintenance; involved in sister chromatid cohesion
TI4896S001458	32/H07		-1.81	SPBC17A3.01c	SPBC8D2.21c; pi044	mitochondrial inner membrane translocase complex; NLI interacting factor family
TI4896S004935	52/B02		-1.81	SPAC11E3.13c		GPI anchored protein (pers. comm. Birgit Eisenhaber); GAS family; involved in cell wall organization and biogenesis (maintenance); glycoprotein; similar to Sp SPBC342.03
TI4896S004447	45/H02		-1.80	SPAC26H5.06	pot1	telomere end-binding protein; single-stranded telomeric DNA-binding protein; involved in telomere maintenance; involved in telomerase-dependent telomere maintenance; involved in protection of chromosome ends; involved in chromosome stability (required); no apparent Sc ortholog
TI4896S002438	51/G09		-1.80	SPBC13G1.15c		very hypothetical protein
TI4896S002487	29/G10		-1.79	SPBC23E6.07c	rfc1	replication factor C (activator 1) subunit; activator of DNA polymerases; BRCT domain; AAA family ATPase
TI4896S003630	25/G08		-1.79	SPAC23C11.06c		conserved hypothetical; hypothetical protein
TI4896S003234	45/G01		-1.79	SPAC22A12.11	dak1	dihydroxyacetone kinase; isoenzyme I
TI4896S002184	20/G08		-1.79	SPBC405.02c	SPBC4C3.01	hypothetical protein; serine/proline rich protein; sequence orphan
TI4896S003427	35/F01		-1.78	SPAC343.13		glutamyl-tRNA amidotransferase; PET112 family
TI4896S000623	30/D06		-1.78	SPCC417.07c		MT organizer; non-essential; coiled-coil predicted; no apparent orthologs cannot be distinguished; related to spindle components S. pombe Pcp1p and S. cerevisiae Spc110p; involved in the localization of gamma tubulin complex to non SPB MTOCs
TI4896S004086	34/B07		-1.78	SPAC1486.04c	alm1	coiled-coil protein; medial region associated during mitosis; deletion mutant results in elongated cells; involved in cytokinesis; non-essential; deletion mutant results in sporulation defects (non-germinating spores); heterozygous mutant spores germinated but produced smaller colonies
TI4896S004723	18/B11		-1.78	SPAC22F8.04		phosphate/phosphoenolpyruvate translocator; no apparent Sc ortholog
TI4896S001782	40/B04	Lethal	-1.78	SPBC1815.02c	cut2; SPBC14C8.01c	securin; involved in mitotic regulation; involved in spindle pole body checkpoint; involved in sister chromatid separation (required); essential
TI4896S002242	05/C11		-1.78	SPBC25H2.04c		mitochondrial import inner membrane translocase subunit; voltage-activated and signal gated channel
TI4896S003370	27/B02		-1.77	SPAC57A7.04c	pab1; pabp	poly(A) binding protein; involved in polyadenylation; non-essential; shuttling factor; involved in rRNA export, mRNA stability
TI4896S001730	26/B10		-1.77	SPBC18E5.07		hypothetical proline-serine rich protein; low similarity to glucoamylase; sequence orphan
TI4896S004593	44/A10		-1.76	SPAC17C9.08	pnu1; nuc1	endonuclease; involved in RNA degradation; involved in the decrease in cellular RNA during nitrogen starvation (implicated)
TI4896S002599	33/C03		-1.76	SPBC1861.02	abp2	ARS binding protein; AT hook protein; non-essential; deletion mutant results in nuclear morphology defects; deletion mutant sensitive to UV; deletion results in aberrant septa; no apparent orthologs
TI4896S000578	11/H08		-1.76	SPCC162.03		short chain dehydrogenase
TI4896S000796	07/E12	Lethal	-1.76	SPCC126.11c		conserved hypothetical; RNA-binding protein; no apparent Sc ortholog; RRM RNA recognition motif
TI4896S000470	27/B03		-1.76	SPCC1322.08	srk1	MAPK-activated protein kinase; involved in osmotic stress; meiotic regulator; interacts physically with Sty1p
TI4896S004908	15/A09	Lethal	-1.76	SPAC14C4.06c		zinc finger protein (inferred); involved in nuclear export; involved in poly(A)+ mRNA-nucleus export; RNA-binding protein; poly(A) binding
TI4896S003835	13/A05		-1.76	SPAC823.15	ppa1	minor serine/threonine protein phosphatase pp2a-1 catalytic subunit; essential; required for cell cycle control
TI4896S001920	32/F04		-1.75	SPBC365.13c	hba1; caf1	Ran-GTPase-binding protein; involved in brefeldin A resistance; involved in nuclear export, oxidative stress response; interacts genetically with crm1; deletion induces nucler accumulation of pap1p and Sty1p
TI4896S000311	27/H05		-1.75	SPCC63.03		DNAJ domain protein; no Sc ortholog
TI4896S004233	36/H05		-1.75	SPAC17A2.05		fumerate reductase; SDH-like flavoprotein subunit
TI4896S002049	50/A11		-1.75	SPBP19A11.02c		hypothetical protein; possibly Sp specific; GPI anchored protein (pers. comm. Birgit Eisenhaber); glycoprotein; no apparent Sc ortholog
TI4896S004173	49/B02		-1.74	SPAP32A8.03c		zinc finger protein; zf-C3HC4 type (RING finger); ubiquitin ligase (E3); no apparent Sc ortholog
TI4896S003650	18/E02		-1.74	SPAC1783.02c		phosphate acyltransferase; involved in phospholipid metabolism
TI4896S003591	18/H12		-1.73	SPAC607.09c		battenin family protein; involved in cellular pH homeostasis; involved in vacuolar pH control; similar to human CLN3 (mutated in Batten's disease)
TI4896S002404	24/F08		-1.73	SPBP8B7.17c		TENA/THI domain; similar to Sp SPBP8B7.18C and SPCC18B5.05C (paralogs); tandem duplication in pB8B7
TI4896S001545	19/B02		-1.73	SPBC28F2.09		transcription initiation factor TFIIA (large subunit)
TI4896S001673	52/C11		-1.73	SPBC16E9.16c		hypothetical protein; sequence orphan; has protein product on MS analysis
TI4896S000322	14/C12		-1.72	SPCC16A11.01	SPCC63.15	conserved hypothetical protein
TI4896S001107	29/F11		-1.72	SPBC354.10		hypothetical protein; sequence orphan; non-essential
TI4896S003045	48/D12		-1.72	SPAC22G7.04	ubp13	WD repeat protein (SMART); ubiquitin C-terminal hydrolase activity; involved in polyadenylation; exonuclease domain
TI4896S003997	41/C03		-1.72	SPAC31G5.03	rps1101; rps11-1	40S ribosomal protein S11
TI4896S001381	30/G05		-1.72	SPBC651.08c	rpc1	DNA-directed RNA polymerase III
TI4896S003998	17/A03		-1.72	SPAC31G5.04		homoisocitrate dehydrogenase; involved in lysine biosynthesis
TI4896S004382	35/B01		-1.72	SPAC2F3.09		5-aminolevulinate synthase activity; involved in glycine metabolism and heme biosynthesis
TI4896S004271	29/D10		-1.71	SPAC8C9.06c		conserved hypothetical; hypothetical protein; PPR domains; no apparent Sc ortholog
TI4896S003524	24/D02	Lethal	-1.71	SPAC140.02	gar2	Gar2 protein; rrm RNA recognition motif; RNA-binding protein
TI4896S000055	38/E12		-1.71	SPCC320.03		transcriptional regulator; zinc finger protein; zf-fungal Zn(2)-Cys(6) binuclear cluster domain; regulator of glucose transporters
TI4896S002589	37/B07	Lethal	-1.70	SPBC56F2.08c		RNA-binding protein; pumilio family; possibly associated with cell structure (microtubules); rrm RNA recognition motif
TI4896S003554	47/B08		-1.70	SPAC9G1.06c	cyk3	src (SH3) homology domain; involved in cytokinesis; non-essential
TI4896S004936	52/B06		-1.70	SPAC11E3.14		conserved protein
TI4896S003114	45/A03	Lethal	-1.69	SPAC1687.04		conserved hypothetical; conserved eukaryotic protein; no apparent Sc ortholog
TI4896S003657	47/E07		-1.69	SPAC1327.01c	SPAC18G6.16c; SPAC1783.09c	transcriptional regulator; zinc finger protein; zf-fungal Zn(2)-Cys(6) binuclear cluster domain
TI4896S002887	45/F08		-1.69	SPAC12G12.03		conserved hypothetical; RNA-binding protein; rrm RNA recognition motif
TI4896S002292	40/D11		-1.68	SPBC3B8.02	php5	CCAAT-box binding factor subunit; involved in growth on non-fermentable carbon sources (required); DNA-binding activity (required); histone fold; involved in the transcriptional activation (of cyc1) (required); histone-like transcription factor family
TI4896S002609	48/A08		-1.68	SPBC14F5.03c	kap123	importin beta subunit; karyopherin-beta; involved in nuclear import; HEAT repeat
TI4896S001591	21/D11		-1.68	SPBC1D7.03c	SPBC1D7.03	cyclin-like protein
TI4896S003872	24/C08		-1.68	SPAC644.11c		pyruvate dehydrogenase (lipoamide) kinase; ATPase; involved in acetyl-CoA biosynthesis from pyruvate; pyruvate dehydrogenase (lipoamide) kinase activity
TI4896S004553	30/H01		-1.68	SPAC30.04c		ABC transporter family; similar to Sp SPAC9E9.12C
TI4896S001182	09/H09		-1.67	SPBC577.10		20S proteasome component (beta 7)
TI4896S004730	47/B02		-1.67	SPAC22F8.11	plc1	1-phosphatidylinositol-4,5-bisphosphate phosphodiesterase 1; phosphoinositide-specific phospholipase C; EF hand motifs; calcium binding protein; C2 domain; pleckstrin homology domain; complexed with 14-3-3 proteins; involved in UV protection
TI4896S000864	25/H04		-1.67	SPCC965.11c		amino acid transporter
TI4896S002267	17/D10		-1.67	SPBC17D1.05		sequence orphan; hypothetical protein; serine-rich protein
TI4896S004041	27/C12		-1.66	SPAC16A10.07c	taz1; myb1; myb	involved in telomere maintenance, telomerase-dependent telomere maintenance, DNA repair; Myb family; DNA binding protein; similar to human TRF2
TI4896S001668	39/A04		-1.66	SPBC16E9.11c	pub3	ubiquitin--protein ligase ubiquitin-protein ligase (E3); HECT domain; WW domain; C2 domain; similar to Sp SPAC11G7.02 and SPAC1805.15C
TI4896S002157	46/A11		-1.65	SPBC30D10.07c		putative biotin-protein ligase; biotin-protein ligase activity
TI4896S000215	39/D07		-1.65	SPCC1672.11c		membrane ATPase; P-type ATPase; P5 type; unknown specificity
TI4896S003752	20/C04		-1.65	SPAC6B12.04c		aminotransferase
TI4896S000700	18/H11		-1.65	SPCC297.01	SPCC1223.14	chorismate synthase; involved in aromatic amino acid biosynthesis
TI4896S001639	10/E08		-1.65	SPBC3H7.11		methyltransferase; Sc ABP140 is actin-binding protein; similar to Sp SPBC21C3.07C
TI4896S002430	15/G02		-1.65	SPBC13G1.01c		mitochondrial ribosomal protein S4
TI4896S000272	47/E04		-1.64	SPCC18B5.08c		isoleucine-tRNA ligase; involved in isoleucyl-tRNA aminoacylation; isoleucine-tRNA ligase activity
TI4896S002651	23/G04		-1.64	SPBC16A3.18		hypothetical protein; rrm RNA recognition motif; RNA-binding protein; similar to Sp SPAC12G12.03c
TI4896S003713	39/B06		-1.64	SPAC6C3.06c		putative cation-transporting ATPase P-type ATPase; P4 type; aminophospholipid translocase
TI4896S004476	48/G12		-1.64	SPAC694.02		DEAD/DEAH box helicase; helicase C-terminal domain; no apparent Sc ortholog
TI4896S001065	16/A11		-1.64	SPBC428.14		acetyltransferase; 1-acylglycerol-3-phosphate acyltransferase; non-essential
TI4896S003976	25/B09		-1.64	SPAC2E1P3.02c		ammonium transporter
TI4896S003293	27/E10		-1.64	SPAC6F12.14	cut23; apc8	anaphase-promoting complex (APC); cyclosome; TPR repeat protein
TI4896S000562	46/E02		-1.63	SPCC584.04	sup35	omnipotent nonsense suppressor; EF1 alpha factor-like GTP-binding protein translation release factor; GTP-binding protein; GTP/GDP-dependent (class-II) release factor; omnipotent nonsense suppressor; interacts physically with Sup45p; complexed with Sup45p; altered form creates prions
TI4896S003143	25/D07		-1.63	SPAC222.12c	atp2	F1-ATPase (beta subunit); ATP synthesis coupled proton transport; functionally complemented by Sc ATP2
TI4896S001936	51/B05		-1.63	SPBC29A10.13	atp7	F0-ATPase (subunit D); ATP synthesis coupled proton transport
TI4896S000746	17/B05		-1.63	SPCC1906.01		mannose-1-phosphate guanyltransferase
TI4896S002850	36/H04		-1.63	SPAC806.08c		hypothetical protein; sequence orphan
TI4896S003297	22/F07		-1.63	SPAC19E9.01c		nucleoporin; non-essential; Functions as a component of the nuclear pore complex (NPC); NPC components, collectively referred to as nucleoporins (NUPs), can play the role of both NPC structural components and of docking or interaction partners for transiently associated nuclear transport factors. Active directional transport is assured by both, a Phe-Gly (FG) repeat affinity gradient for these tr…
TI4896S000899	37/D07		-1.62	SPCP1E11.02		Ark1/Prk1 family protein kinase; serine/threonine protein kinase; similar to Sp SPBC6B1.02 and SPBC557.04; actin cortical patch component; consensus phosphorylation target site [LI]XXQXTG (putative)
TI4896S000991	44/D03		-1.62	SPBC1773.03c		aminotransferase; no apparent Sc ortholog
TI4896S000057	17/B04		-1.61	SPCC320.01c	bio2; SPCC1235.02	biotin synthase activity; involved in biotin biosynthesis; functionally complements S. cerevisiae BIO2
TI4896S003812	47/H03		-1.61	SPAC4A8.08c		putative valyl tRNA synthetase
TI4896S003687	06/C09		-1.60	SPAC4G9.12		glucokinase
TI4896S002259	34/A01		-1.60	SPBC17D11.05	tif32	translation initiation factor (eiF3 p110 subunit); PCI domain
TI4896S003273	08/F08		-1.60	SPAC1565.01		hypothetical protein
TI4896S000455	06/F01		-1.60	SPCC645.12c		hypothetical protein; sequence orphan; GARP complex (possible not reciprocal best hits, but blast candidate check)
TI4896S000461	29/H01		-1.60	SPCC23B6.04c		conserved CRAL/TRIO domain protein; sec14 cytosolic factor family; involved in lipid movement between membranes
TI4896S004236	10/D09		-1.60	SPAC17A2.08c		hypothetical protein; sequence orphan
TI4896S002684	48/G06		-1.60	SPBC16C6.06	pep1; vps10	putative membrane glycoprotein; possibly vacuolar sorting receptor; involved in intracellular protein transport; 11 BNR repeats
TI4896S003451	29/A08		-1.60	SPAC664.10		kinesin-like protein
TI4896S001828	34/A04		-1.59	SPBC12D12.04c	sts6; pkc1; pck2	serine/threonine protein kinase; protein kinase C-like 2; non-essential; function overlapping with pck1; involved in cellular morphogenesis; involved in cell wall biosynthesis (required); involved in cell polarity (regulation) target of Rho1p; target of Rho2p; involved in cell wall alpha-glucan biosynthesis (requlation); C2 domain; similar to Sp pck1 (paralog)
TI4896S000271	45/G06	Lethal	-1.59	SPCC18B5.07c		RanBp binding domain
TI4896S001051	29/C11		-1.59	SPBC582.10c		DEAD/DEAH box helicase; involved in nucleotide-excision repair; involved in DNA repair; SNF2 familyhelicase; C-terminal domain; non-essential
TI4896S000033	16/F01		-1.59	SPCC330.04c	B13958-3	Sp specific families; B13958-domain; predicted coiled-coil; repeat containing
TI4896S000347	16/D08		-1.58	SPCC24B10.10c		AAA family ATPase; involved in intra-mitochondrial sorting
TI4896S004832	26/E08		-1.58	SPAC22E12.10c	etp1; cox15	electron transfer protein; ferredoxin; involved in cytochrome c oxidase biognesis; overexpression enhances steroid hydroxylase activity of human CYP11B2 expressing Sp cells; includes 2Fe-2S iron-sulfur cluster binding domain absent from Sc COX15
TI4896S004686	28/E07		-1.58	SPAC1834.11c	sec18	required for vesicle-mediated transport; catalyzes the fusion of transport vesicles within the Golgi cisternae; is also required for transport from the endoplasmic reticlum to the Golgi stack; seem to function as a fusion protein required for the delivery of cargo proteins to all compartments of the Golgi stack independent of vesicle origin (By similarity); the AAA ATPase family
TI4896S004741	44/G12		-1.57	SPAC4F10.02		aspartyl aminopeptidase; metallopeptidase; peptidase family M18
TI4896S001234	48/F03		-1.57	SPBC646.02	cwf11	complexed with Cdc5p; involved in mRNA splicing; no apparent Sc ortholog
TI4896S003598	28/D11		-1.57	SPAC3C7.04		transcriptional regulator; zinc finger protein; zf-fungal Zn(2)-Cys(6) binuclear cluster domain; putative metabolic control; similar to Sp thi1
TI4896S000492	12/F06		-1.57	SPCC338.11c	uvi22; rrg1	experimentally characterised; UV-induced protein; transcriptionally regulated by glucose; regulated post transcriptionally by control of mRNA stability; deletion mutant results in reduced size; non-essential; overexpression results in elongated cells of G2 delay; involved in G2/M phase progression; regulated by the SAPK pathway
TI4896S001135	34/G02		-1.57	SPBC947.15c		NADH dehydrogenase
TI4896S000572	30/B08		-1.56	SPCC162.09c	hmg1	3-hydroxy-3-methylglutaryl-coA reductase
TI4896S003117	42/A08		-1.56	SPAC1687.07		very hypothetical protein; has transcript profile on microarray
TI4896S001159	42/B03		-1.56	SPBC119.04	mei3	21 kD protein inducing meiosis and sporulationinduces meiosis and sporulation; phosphorylated by Pka1p; no apparent orthologs
TI4896S001272	47/G02		-1.55	SPBC146.09c		L-amino acid oxidase; SWIRM domain; no apparent Sc ortholog
TI4896S001616	05/C10		-1.55	SPBC18H10.17c		hypothetical protein; sequence orphan
TI4896S002816	43/F10		-1.55	SPAC5H10.11	gmh1	alpha-1,2-galactosyltransferase Gmh1; GMA12/MNN10 family; Belongs to the glycosyltransferase 34 family; predicted N-terminal signal sequence; similar to S. pombe gmh3 and gmh2 and gma12 and SPBC1289.13C and SPAC5H10.13C and SPAC637.06 and SPBC8D2.17
TI4896S002686	11/G12		-1.55	SPBC16C6.08c	qcr6	ubiquinol cytochrome c reductase complex subunit (cytochrome bc1 complex); respiratory complex III
TI4896S002019	13/A11		-1.55	SPBC685.06	rps001; rps0-1; rpsa-1	40S ribosomal protein S0 (p40)
TI4896S000565	21/F11		-1.54	SPCC1753.02c	git3	glucose-triggered adenylate cyclase activation protein; glucose receptor
TI4896S000808	44/C01		-1.54	SPCC1620.08		succinate-CoA ligase (beta subunit); involved in succinyl-CoA metabolism; involved in tricarboxylic acid cycle; succinate-CoA ligase activity
TI4896S002903	37/G01		-1.54	SPAC1751.01c	gti1	experimentally characterised; DeSpription required for gluconate-H+ symport; anion transport; similar to Sp pac2
TI4896S003606	44/D06		-1.54	SPAC3C7.12	noc1; tip1	microtubule-associated protein; involved in microtubule based movement; similar to eukaryotic intermediate filament proteins; involved in actin cytoskeletal organization; involved in cell polarity; CLIP170 like protein; CAP-Gly domain
TI4896S001785	23/E09		-1.54	SPBC14C8.04		acetolactate synthase (small subunit)
TI4896S004532	48/E04		-1.53	SPAC27F1.09c	prp10; sap155	U2 snRNP component; involved in mRNA splicing (IGI); essential; complexed with Cdc5p
TI4896S004006	40/A10		-1.53	SPAC31G5.12c	n150	negative regulator of RNA polymerase
TI4896S003873	38/E01		-1.53	SPAC644.12	cdc5	transcriptional regulator; Myb family; DNA binding protein; essential; involved in mRNA splicing (required); 40S snRNP-containing complex; involved in G2/M phase progression (required); depletion causes accumulation of unspliced mRNAs; involved in nuclear division (required); nineteen complex (Ntc); interacts physically with Cwf8p (residues 443-515); interacts physically with Cwf1p
TI4896S004580	48/G02		-1.53	SPAC9E9.12c	abc1	Abc1 transporter; ABC transporter family; MDR subfamily; similar to mammalian bile acid transporter
TI4896S003435	09/A06		-1.53	SPAC824.03c		conserved hypothetical protein
TI4896S002726	45/F05		-1.53	SPBP4G3.01	SPBC8E4.01c	inorganic phosphate transporter; MFS inorganic phosphate transporter
TI4896S002708	33/H12		-1.53	SPBC1289.04c	pob1	involved in cell polarity (maintenance) (required); involved in cellular elongation (required); involved in cytokinesis; involved in cell separation (required); essential; pleckstrin homology domain; SAM domain (sterile alpha motif); src (SH3) homology domain
TI4896S004494	05/A11	Lethal	-1.53	SPAC21E11.03c	mts2; pcr1	bZIP (basic leucine zipper) transcription factor family; no apparent Sc ortholog; involved in the regulation of gene expression for sexual development; overexpression suppresses calcium activity of ATF1; involved in stress response; activator of meiotic recombination hotspot; similar to Sp atf21 and atf1 (paralogs); involved in meiosis
TI4896S004647	45/G10		-1.53	SPAC1093.04c		tRNA nucleotidyltransferase
TI4896S002319	43/C03		-1.53	SPBC2G2.10c		sequence orphan; hypothetical protein
TI4896S003670	06/D07		-1.53	SPAC18G6.14c	rps7	40S ribosomal protein S7
TI4896S002274	11/C08		-1.53	SPBC11C11.05		involved in cell wall biosynthesis
TI4896S002508	38/E04		-1.52	SPBC1604.12		hypothetical protein; sequence orphan
TI4896S003744	17/E10		-1.52	SPAC15F9.02		WD repeat protein; nuclear pore complex; involved in nuclear transport
TI4896S001856	04/B09		-1.52	SPBC19G7.12c		hypothetical protein; sequence orphan; overlaps with SPBC19G7.18c, one isn't real
TI4896S004402	18/E06		-1.52	SPAC27E2.07		glycosyltransferase; involved in cell wall biosynthesis; deletion mutant galactomannans deficient for pyruvylated galactose-beta-1,3-galactose-alpha-1,2-pyruvylgalactose (PvGal) (pers. comm. Robert Trimble); no apparent orthologs
TI4896S002664	33/B04		-1.52	SPBC16A3.05c	rae1	WD repeat protein; poly(A)+ RNA export protein; nuclear pore complex; involved in nuclear import; involved in nuclear export; involved in nuclear export of the small ribosomal subunit; interacts physically with Mex67p (in RNA export); involved in mitotic progression (required)
TI4896S004381	35/F11		-1.52	SPAC2F3.08	sut1	alpha-glucoside transporter; function overlapping with?; glycoside-pentoside-hexuronide cation symporter family; major facilitator superfamily; involved in maltose uptake; no apparent Sc ortholog
TI4896S004818	35/B12		-1.51	SPAC890.04c		WD repeat protein; Sc YTM1 is a microtubule-associated protein
TI4896S000227	29/H05		-1.51	SPCC1183.11	SPCC31H12.01	MS ion channel; EF hand motif; no apparent Sc ortholog; similar to Sp SPAC2C4.17C (paralog)
TI4896S003078	24/H04		-1.51	SPAC2G11.06	vps4	AAA family ATPase; involved in intracellular protein transport; involved in endosomal maturation; class E vps; bam1/bed5 suppressor; MIT domain
TI4896S004295	46/E12		-1.51	SPAC15A10.15		hypothetical protein; sequence orphan
TI4896S004087	48/H04		-1.51	SPAC1486.05	nup189	nucleoporin; nuclear pore complex; involved in nuclear import; involved in nuclear export; involved in nuclear export of the small ribosomal subunit; interacts physically with Ned1p (2-hybrid); essential
TI4896S000720	34/C10		-1.51	SPCC74.06	mak3; SPCC74.06	histidine kinase; involved in signal transduction; His-to-Asp phosphorelay; non-essential; functions upstream of Spy1p; function overlapping with Mak2p and Mak1p; involved in mitotic cell cycle control (implicated); involved in oxidative stress response (implicated); involved in the regulation of sexual development (required); PAC domain protein; similar to Sp mak2 and mak1; response regulator re…
TI4896S002575	32/D04	Lethal	-1.51	SPBC1347.03	meu14	involved in meiosis, spore wall assembly, nuclear division (meiosis II); predicted coiled-coil region; meiotic expression upregulated; Mei4p dependent transcription
TI4896S000552	30/F09		-1.50	SPCC584.10c	SPCC188.13c	2 RNase III signature motifs; involved in RNA interference, PTGS. the regulation of chromatin silencing at the centromere, the regulation of histone L9 methylation; possibly degrades double-stranded RNA; similar to C. elegans mut-7; no apparent Sc ortholog
TI4896S004177	51/F02		-1.50	SPAC3H5.09c		hypothetical protein
TI4896S002383	47/B05		-1.50	SPBC16D10.08c		AAA family ATPase; chaperonin ATPase activity; involved in protein folding
TI4896S003854	34/C11		-1.50	SPAC4F8.12c	spp42; cwf6	Status U5 snRNA-associated splicing factor; involved in mRNA splicing; complexed with Cdc5p
TI4896S001352	33/H09		-1.50	SPBC4.04c	mcm2; nda1; cdc19	MCM complex subunit; involved in DNA replication (initiation) (required); involved in cytokinesis (required); involved in septation (required); expression peaks at M-G1 phase; regulated by PBF transcription complex
TI4896S001116	35/F06		-1.49	SPBC839.02		hypothetical protein; possibly fungal specific; similar to Sp SPBC2D10.04 (paralog)
TI4896S001110	37/H09		-1.49	SPBC354.13	rga6	GTPase activator; RhoGAP domain
TI4896S004289	46/D09		-1.49	SPAC15A10.08	ain1	alpha-actinin; calponin homology (CH) domain; involved in cytokinesis; involved in actin cytoskeletal organization; involved in contractile ring assembly; no apparent Sc ortholog
TI4896S001095	11/G03		-1.49	SPBC649.03	rhp14	XP-A family; involved in DNA repair; involved in nucleotide-excision repair; non-essential
TI4896S000640	13/C04		-1.49	SPCC191.12c	SPCC1450.01c	putative pseudogene
TI4896S004563	30/C07		-1.49	SPAC29E6.10c	SPAC30.14c	predicted coiled-coil; troponin domain
TI4896S002031	31/G12		-1.49	SPBC32F12.09	rum1	CDK inhibitor; regulator of G1 phase progression; involved in pheromone induced G1 arrest; functional ortholog of Sc SIC1; 2 transcripts; expression cell cycle dependent; phosphorylated by MAPK
TI4896S002738	50/C08		-1.49	SPBPB2B2.10c		galactose-1-phosphate uridylyltransferase
TI4896S002565	30/E04		-1.49	SPBC215.08c	arg4	carbamoyl-phosphate synthase; involved in arginine biosynthesis, glutamate catabolism; ATP binding domain
TI4896S001968	31/B10		-1.49	SPBC3E7.01	fab1; SPBC6B1.11c	1-phosphatidylinositol-4-phosphate 5-kinase activity; involved in signal transductionand conjugation; zinc finger protein; zf-FYVE type; induced by nitrogen starvation; non-essential
TI4896S001925	45/H09		-1.49	SPBC29A10.02	SPBC365.18	single-strand polynucleotide binding protein; rrm RNA recognition motif (2); RNA-binding protein; no apparent Sc ortholog
TI4896S002052	41/C04		-1.49	SPBP19A11.05c		60S ribosomal protein L2, mitochondria
TI4896S003406	14/B02		-1.48	SPAP27G11.09c		GTP cyclohydrolase; involved in riboflavin biosynthesis
TI4896S000545	51/E05		-1.48	SPCC188.06c	srp54	signal sequence binding activity; GTPase; essential; involved in intracellular protein transport; involved in protein-ER targeting (required); involved in SRP-dependent cotranslational membrane targeting
TI4896S001402	37/C11		-1.48	SPBC30B4.02c		R3H domain; G-patch domain
TI4896S002038	41/A12		-1.48	SPBC19C7.03	cyr1; git2	adenylate cyclase
TI4896S000140	28/B01		-1.48	SPCC1682.15		PXA domain; PX domain; involved in intracellular signaling cascade; no apparent orthologs
TI4896S002796	34/F10		-1.48	SPAC11D3.08c		amino acid permease familysimilar to Sp SPBC15C4.04C and SPAPB24D3.02C and SPCC74.04 and SPAC1039.01 and SPCC584.13 and SPAC9.10 and SPCC794.03
TI4896S000330	42/F01		-1.48	SPCC16A11.09c		mitochondrial import inner membrane translocase subunit
TI4896S001956	12/H04		-1.48	SPBC25B2.10		hypothetical protein; binds ATP; ScYOR019W
TI4896S004188	29/A05		-1.48	SPAC3A11.09		sodium/hydrogen exchanger family
TI4896S000045	18/C05		-1.48	SPCC320.13c	ark1; SPCC330.16	serine/threonine protein kinase; aurora homolog; involved in spindle assembly checkpoint; involved in spindle formation (required); involved in sister chromatid separation (required); involved in microtubule attachment (required); interacts physically and/or genetically with the inner centromere protein Pic1p; interacts physically and/or genetically with the inner centromere protein Bir1p; intera…
TI4896S001478	50/C07		-1.48	SPBP22H7.06	pi025; SPACTOKYO_453.09c	hypothetical protein; low similarity to uridine kinase
TI4896S002056	32/F10		-1.47	SPBP4H10.03	oxa102; oxa1; oxa1-2; oxa1sp2; SPBC1346.02c	involved in respiratory complex biogenesis; cytochrome c oxidase assembly protein; similar to Sp oxa101 (paralog); essential with oxa101
TI4896S001353	32/C04		-1.47	SPBC4.05	mlo2	zinc finger protein; zf-PHD finger; involved in transcriptional regulation; no apparent Sc ortholog; similar to D. melanogaster CG15141; non-essential
TI4896S001647	29/H02		-1.47	SPBC3H7.03c		2-oxoglutarate dehydrogenase (lipoamide) (e1 component of oxoglutarate dehydrogenase complex); involved in 2-oxoglutarate metabolism; involved in tricarboxylic acid cycle; oxoglutarate dehydrogenase (lipoamide) activity
TI4896S002694	37/H11		-1.47	SPBC244.01c	sid4	SIN component scaffold protein; involved in cytokinesis; localizes components of the SIN to the SPB; septation initiation pathway; mutant septum initiation defective; interacts physically with Cdc11p (IAP); coiled-coil region; no apparent orthologs
TI4896S002564	35/E04		-1.47	SPBC215.07c		PWWP domain protein; similar to Sp SPAC23D3.01 and SPBC29A3.13C (paralogs); involved in cell growth
TI4896S001244	39/F10		-1.47	SPBC646.12c	src1; sar1; gap1	GTPase-activating protein; GTPase-activating protein; no apparent Sc ortholog
TI4896S001905	39/A10		-1.47	SPBC557.04		probable serine/threonine-protein kinase Ark1/Prk1 family protein kinase; serine/threonine protein kinase; similar to Sp SPBC6B1.02 and SPCP1E11.02; actin cortical patch component; consensus phosphorylation target site [LI]XXQXTG (putative)
TI4896S003803	22/B11		-1.46	SPAC25H1.06		WD repeat protein; involved in chromatin assembly/disassembly; no apparent Sc ortholog
TI4896S004296	30/F12		-1.46	SPAC15E1.01	fat1; SPAC15A10.16	actin binding protein; involved in actin cytoskeletal organization
TI4896S001405	47/E12		-1.46	SPBC30B4.05		karyopherin-beta; involved in nuclear export; interacts with centromeric element CDEII; involved in chromosome segregation
TI4896S002644	46/G03		-1.46	SPBC16G5.15c		transcription factor; fork head domain; FHA domain (phosphopeptide binding)
TI4896S001824	29/E09		-1.46	SPBC16H5.02	pfk1	6-phosphofructokinase; overexpression results in cell cycle defects; involved in glycolysis; 6-phosphofructokinase activity; Sp appears to only have one isoform, most other yeasts have 2, is this in one of the gaps?
TI4896S003686	42/H05		-1.46	SPAC4G9.11c	cmb1	HMG box mismatch binding protein vHMG box; involved in DNA repair; involved in mismatch repair; binds to cytosines in base mismatches and opposite chemically altered guanines
TI4896S004661	44/B11		-1.46	SPAC144.04c	spe1	ornithine decarboxylase
TI4896S000937	35/A06		-1.45	SPBC1683.08	ght4	hexose transporter; similar to Sp GHT1 and GHT2 and GHT3 and GHT5 and GHT6 and SPCC548.06C and SPBC1348.14C
TI4896S002214	50/F10		-1.45	SPBC21.01	SPBC776.19	hypothetical protein hypothetical protein; serine-rich protein; sequence orphan
TI4896S001276	39/C03		-1.45	SPBC146.13c	myo1	putative myosin I protein myosin I; actin cortical patch component; involved in F-actin assembly; involved in cytokinesis; involved in actin cortical patch distribution; type I myosin; involved in cell cycle dependent actin filament organization; src (SH3) homology domain; IQ domains
TI4896S001892	28/H09		-1.45	SPBC12C2.08		dynamin family; dynamin GTPase effector domain; involved in mitochondrial morphology; involved in mitochondrial localization; involved in mitochondrial fission
TI4896S004903	08/H02		-1.45	SPAC14C4.01c	SPAC19D5.08c	hypothetical protein; sequence orphan
TI4896S001891	14/A02		-1.45	SPBC12C2.09c		UPF0073; involved in lipid homeostasis; involved in phosphate homeostasis
TI4896S001972	35/G09		-1.45	SPBC3E7.06c		transporter; unknown specificity
TI4896S002623	48/C12		-1.44	SPBC3F6.05	rga1	GTPase activator; RhoGAP domain; LIM domain; involved in actin cytoskeletal organization; involved in actin cortical patch distribution; involved in cellular morphogenesis; involved in cell wall biosynthesis; involved in septum formation; involved in septation; putative GAP for Rho1p
TI4896S001141	43/C01		-1.44	SPBC947.09		conserved hypothetical; hypothetical protein; possibly fungal specific
TI4896S000315	14/E11		-1.44	SPCC63.07		conserved hypothetical; conserved protein
TI4896S002739	50/C06		-1.44	SPBPB2B2.11		putative dTDP-glucose 4,6-dehydratase; no apparent Sc ortholog
TI4896S004291	28/D04		-1.44	SPAC15A10.10	mde6	involved in sporulation; involved in mitosis; Mei4p-dependent expression; Muskelin homolog; kelch repeat protein; non-essential; no apparent Sc ortholog
TI4896S003722	36/D06		-1.44	SPAC17G8.06c	ilv3	dihydroxy-acid dehydratase; involved in branched chain amino acid biosynthesis
TI4896S003260	05/D01		-1.44	SPAC10F6.16		cAMP-regulated phosphoprotein/endosulfine conserved region; eukaryotic conserved protein
TI4896S000928	39/E06		-1.44	SPBC359.05		probable ATP-dependent permease ABC transporter family; transporter activity; similar to Sp SPAC3F10.11c
TI4896S003694	14/H11		-1.44	SPAC4G9.20c		mitochondrial carrier; involved in mitochondrial transport; unknown specificity
TI4896S002974	25/F01		-1.44	SPAC2F7.11	nrd1	negative regulator of differentiation; rrm RNA recognition motif; RNA-binding protein; block the onset of sexual development by repressing the Ste11p
TI4896S002961	38/F09		-1.44	SPAC227.15		protein phosphatase regulatory subunit
TI4896S000699	47/D06		-1.44	SPCC1223.13		sequence orphan; hypothetical protein
TI4896S003359	12/D09		-1.43	SPAC5D6.02c		hypothetical protein; sequence orphan
TI4896S003206	48/D05		-1.43	SPAC30D11.04c	nup124	nuclear pore complex
TI4896S001804	35/A04		-1.43	SPBC15C4.06c	SPBC21H7.01c	zinc finger protein; zf-C3HC4 type (RING finger); ubiquitin ligase (E3); no apparent orthologs
TI4896S003485	37/E11	Lethal	-1.43	SPAC1002.05c		zinc finger protein; zf-C5HC2 type; jmjC domain; jmjN domain; DNA-binding protein; ARID DNA domain; similar to retinoblastoma binding proteins; involved in transcriptional regulation
TI4896S003543	42/H06		-1.43	SPAC3H1.08c		hypothetical protein; with coiled-coil region hypothetical protein; predicted coiled-coil region
TI4896S001779	10/F09		-1.43	SPBC17G9.12c		hypothetical protein
TI4896S001854	29/B10		-1.43	SPBC19G7.10c		topoisomerase associated protein
TI4896S000312	48/F12		-1.43	SPCC63.04	mok14	a-1,3-glucan synthase; alpha glucan synthase; glycosyl transferase family 1; similar to Sp MOK1 and MOK11 and MOK13 and MOK12; involved in cell wall biosynthesis; no apparent Sc ortholog
TI4896S002717	17/G01		-1.43	SPBC1289.13c		alpha-1,2-galactosyltransferase; GMA12/MNN10 family; predicted N-terminal signal sequence; similar to S. pombe gmh1 and gmh3 and gmh2 and gma12 and SPAC5H10.13C and SPAC637.06 and SPBC8D2.17 paralogs; similar to S. cerevisiae YDR245W and YJL183W
TI4896S002012	07/H09		-1.42	SPBC336.13c		mitochondrial inner membrane peptidase complex; signal peptidase activity; involved in mitochondrial processing
TI4896S004608	04/A04		-1.42	SPAC27D7.07c	smd1	small nuclear ribonucleoprotein Smd1; pre-mRNA splicing factor; complexed with Cdc5p
TI4896S003964	48/E05		-1.42	SPACUNK4.07c	cta4; sev4; SPAPYUK71.01	P-type ATPase; P4 type; involved in regulation of calcium homeostasis; involved in cytokinesis; involved in cellular morphogenesis; involved in microtubule based movement
TI4896S000522	44/F04		-1.42	SPCC622.14		zinc finger protein; zf-GCS type; putative ADP-ribosylation factor; GTPase-activating protein
TI4896S001161	10/A06		-1.42	SPBC119.06	sco1	involved in cytochrome c oxidase biogenesis
TI4896S001680	40/A07		-1.42	SPBC1A4.01	apc10; SPBC1E8.06	anaphase-promoting complex (APC); regulators of the APC-cyclosome; involved in cyclin degradation (required); involved in metaphase-anaphase transition (required)
TI4896S003797	25/E03		-1.41	SPAC23H3.14		conserved hypothetical; hypothetical protein
TI4896S002621	15/D02		-1.41	SPBC3F6.02c		3 beta-hydroxysteroid dehydrogenase/delta 5-->4-isomerase
TI4896S002646	45/E09		-1.41	SPBC16G5.17		transcriptional regulator; zinc finger protein; zf-fungal Zn(2)-Cys(6) binuclear cluster domain; similar to Sp SPAC3H8.08C
TI4896S000694	25/E11		-1.41	SPCC1223.08c	dfr1	dihydrofolate reductase
TI4896S003127	12/D08		-1.41	SPAC1687.16c		C-5 sterol desaturase; involved in ergosterol biosynthesis
TI4896S004092	28/D02		-1.41	SPAC6G10.01	thi1; ntf1; SPAC1486.10	zinc finger protein; zf-fungal Zn(2)-Cys(6) binuclear cluster domain; thiamine repressible genes regulatory protein; transcriptional regulator of nmt1
TI4896S002011	33/G05		-1.41	SPBC336.12c	cdc10	DSC1/MBF trancription factor complex; involved in start control point of mitotic cell cycle; involved in transcriptional activation; ankyrin repeat protein; yeast DNA-binding domain; APSES domain; DNA-binding protein; involved in the regulation of CDK activity; involved in control of mitosis; similar to Sp SPBC725.16 and SPAC22F3.09c
TI4896S000452	03/D04		-1.40	SPCC645.09		mitochondrial ribosomal protein L37
TI4896S003692	22/D05		-1.40	SPAC4G9.17c		mitochondrial ribosomal protein S5
TI4896S001961	20/C06		-1.40	SPBC6B1.04	mde4	no apparent orthologs; involved in meiosis (implicated); involved in sporulation (implicated); Mei4p-dependent expression
TI4896S002514	44/G02		-1.40	SPBC1604.06c		conserved protein
TI4896S004142	31/B05		-1.39	SPAC26A3.05	chc1	clathrin heavy chain
TI4896S000894	36/E03		-1.39	SPCC1827.04		eukaryotic conserved protein; ankyrin repeat protein; zinc finger (inferred)
TI4896S000254	12/G05		-1.39	SPCC16C4.11	pef1	Pho85/PhoA-like cyclin-dependent kinase; serine/threonine protein kinase
TI4896S000711	50/A03		-1.39	SPCC737.08		midasin; predicted coiled-coil protein; involved in nuclear export; AAA family ATPase; EF hand motif; calcium binding protein; Sc MDN1 is null lethal
TI4896S003363	39/D06		-1.39	SPAC57A7.11	mip1	putative guanine nucleotide binding protein WD repeat protein; facilitates function of the meiotic regulator Mei2p
TI4896S001420	33/G12		-1.39	SPBC27B12.12c		metal ion transporter; MIT family; inorganic cation transporter
TI4896S001791	05/D04		-1.39	SPBC14C8.10		mitochondrial ribosomal protein L28 (L24)
TI4896S000099	14/H01		-1.38	SPCC553.06		sequence orphan; hypothetical protein
TI4896S004055	11/A09		-1.38	SPAC688.02c		spindle pole body component; involved in chromosome segregation
TI4896S002059	34/A08		-1.38	SPBP4H10.06c	cut14	condensin subunit; SMC2 subunit; essential; involved in chromosome condensation (mitosis) (required); involved in chromosome segregation (mitosis) (required)
TI4896S001634	34/D02		-1.38	SPBC3H7.16	SPBC28E12.06c	lysosomal trafficking regulator; WD repeat protein; Beach domain; zinc finger protein; zf-FYVE type; beige protein homolog
TI4896S002345	10/D02		-1.38	SPBC1105.09	ubc15	ubiquitin conjugating enzyme; involved in the regulation of transcriptional silencing of heterochromatin; no apparent Sc ortholog; involved in transcriptional silencing of the mating-type region; overexpression derepressed transcriptional silencing of the mating-type region
TI4896S000041	05/E06		-1.37	SPCC330.12c	sdh3	putative succinate dehydrogenase cytochrome
TI4896S000450	30/E12		-1.37	SPCC645.07	rgf1	non-essential; RhoGEF; pleckstrin homology domain; similar to Sp SPCC645.06c and SPAC1006.06
TI4896S002666	27/C02		-1.37	SPBC16A3.03c		sequence orphan; hypothetical protein
TI4896S001325	26/C12		-1.37	SPBC1709.17		folypolyglutamate synthase
TI4896S000842	13/C09		-1.37	SPCC790.03		rhomboid family protease; peptidase S54 family; 6 predicted transmembrane helices; predicted N-terminal signal sequence; probable serine protease (By similarity)
TI4896S000472	09/H11		-1.37	SPCC1322.10		Sp specific families; hypothetical protein; possibly Sp specific; serine-rich protein; GPI anchored protein (pers. comm. Birgit Eisenhaber); no apparent Sc ortholog; glycoprotein
TI4896S001510	34/F08		-1.37	SPBC83.03c		sequence orphan; hypothetical protein; serine-rich protein
TI4896S002934	17/D05		-1.37	SPAC24H6.10c		phospho-2-dehydro-3-deoxyheptonate aldolase; shikimate pathway (1st step)
TI4896S001252	15/C08		-1.37	SPBP35G2.03c		sequence orphan; hypothetical protein
TI4896S002235	30/D05		-1.37	SPBC25H2.11c		bromodomain protein; involved in transcriptional activation; SAGA complex
TI4896S003013	15/F08		-1.37	SPAC1D4.08		CDP-diacylglycerol-inositol 3-phosphatidyltransferase
TI4896S002511	11/D02		-1.37	SPBC1604.09c		exonuclease
TI4896S003498	06/A05		-1.36	SPAC1002.17c		uracil phosphoribosyltransferase activity
TI4896S002358	28/B06		-1.36	SPBC887.04c		WD repeat protein; PLAP family; involved in ubiquitin-dependent proteolysis; interacts physically with SPAC1565.08; involved in DNA repair; RAD6 epistasis group; similar to mammalian phospholipase a-2-activating protein
TI4896S003623	49/F10		-1.36	SPAC20H4.10	ufd2; SPAC145.04	ubiquitin-protein ligase (E4); U-box domain; ubiquitin fusion degradation protein-2
TI4896S003336	18/H08		-1.36	SPAC3A12.17c		cysteine synthase
TI4896S000090	22/A05		-1.36	SPCC794.11c		actin cortical patch component; ENTH domain protein; involved in endocytosis; involved in actin cytoskeletal organization
TI4896S004565	33/D01		-1.36	SPAC16.02c	srp2	RNA-binding protein; involved in mRNA splicing; no apparent Sc ortholog; rrm RNA recognition motif
TI4896S004821	36/B04		-1.36	SPAC890.07c		arginine N-methyltransferase activity; involved in regulation of RNA-nucleus export; involved in nuclear export
TI4896S004282	27/G04		-1.35	SPAC15A10.01	SPAC8C9.18	ABC family; membrane transporter
TI4896S001061	38/B03		-1.35	SPBC428.10		hypothetical protein; sequence orphan; non-essential
TI4896S004287	26/E07		-1.35	SPAC15A10.06		CPA1 sodium ion/proton antiporter
TI4896S000561	34/G05		-1.35	SPCC584.03c		RanGTP-binding protein; similar to Sp SPCC584.03C (paralog)
TI4896S004152	26/C06		-1.35	SPAC26A3.15c		nucleoporin; nuclear pore complex; involved in nuclear export; involved in nuclear import
TI4896S004414	11/H03		-1.34	SPAC19G12.05		tricarboxylate carrier activity
TI4896S002257	10/E07		-1.34	SPBC17D11.03c		hypothetical protein
TI4896S004439	06/E06		-1.34	SPAC23A1.16c		conserved eukaryotic protein; DUF408; Sc YER139C is required for growth at high temperatures
TI4896S004891	29/D09		-1.34	SPAC26F1.01	sec74; SPAPJ691.01c	Sec7 domain; pleckstrin homology domain; domain combination also occurs in human and C. elegans cytohesins; homologs appear to be guanine nucleotide exchange factor for ADP-ribosylation factors; binds phosphoinositides and/or involved in vesicular transport
TI4896S002489	30/D01		-1.34	SPBC23E6.09	ssn6	TPR repeat protein; general repressor of RNA polymerase II transcription
TI4896S001462	32/H03		-1.34	SPBC17A3.05c	pi041	DNAJ domain protein; no apparent Sc ortholog
TI4896S004460	44/F01		-1.34	SPAC25B8.06c		probable seryl-tRNA synthetase; serine-tRNA ligase; involved in seryl-tRNA aminoacylation; serine-tRNA ligase activity; cellular component unknown
TI4896S003100	33/H05		-1.33	SPAC23G3.08c	ubp7	ubiquitin C-terminal hydrolase activity
TI4896S002501	27/C01		-1.33	SPBC1604.19c		TRAPP; involved in intracellular protein transport; similar to Sp SPBC1734.07C (paralog)
TI4896S000129	08/B10		-1.33	SPCC1682.04		EF hand motifs; involved in spindle pole body duplication (IMP); calcium binding protein; Caltractin-cdc31 subfamily; involved in Sad1p localization (required); essential
TI4896S003334	28/B07		-1.33	SPAC3A12.15	vps53	involved in intracellular protein transport; involved in vacuolar sorting; GARP complex; involved in protein sorting in the late Golgi; involved in retrograde transport from the prevacuole; involved in docking at the trans-Golgi network; similar to S. cerevisiae YJL029C
TI4896S003424	31/A04		-1.32	SPAC343.11c		zinc finger protein; zf-C5HC2 type; jmjC domain; jmjN domain; similar to retinoblastoma binding proteins; involved in transcriptional regulation; overexpression supresseses chk1 mutant; non-essential; no apparent Sc ortholog
TI4896S002972	23/G10		-1.32	SPAC2F7.09c		conserved hypothetical protein; ATP/GTP binding protein; no apparent Sc ortholog; conserved in bacteria
TI4896S001514	28/C08		-1.32	SPBC83.07		Lid2 complex; involved in transcriptional regulation; interacts physically with SET1 complex; involved in chromatin remodeling (regulation); zinc finger protein; jmjC domain
TI4896S004562	15/C02		-1.32	SPAC30.13	SPAC29E6.09	sequence orphan; hypothetical protein
TI4896S000570	21/B07		-1.32	SPCC162.11c		uridine kinase; uracil phosphoribosyltransferase; involved in pyrimidine metabolism; pyrimidine salvage pathway
TI4896S004673	05/E03		-1.32	SPAC144.16		conserved protein; Sc YHR122W is null lethal; DUF59
TI4896S004807	25/C06		-1.32	SPAC1952.09c		acetyl-CoA hydrolase
TI4896S004765	13/H12		-1.31	SPAC19B12.06c		conserved hypothetical; rhomboid family protease; 5 predicted transmembrane helices; predicted N-terminal signal sequence; peptidase S54 family; similar to Sp SPCC790.03; similar to S. cerevisiae YPL246C
TI4896S001192	38/B01		-1.31	SPBC530.05		transcriptional regulator; zinc finger protein; zf-fungal Zn(2)-Cys(6) binuclear cluster domain; similar to A. nidulans transcriptional activator required for growth on acetate
TI4896S003112	11/F05	Lethal	-1.31	SPAC1687.02		CAAX prenyl protease; involved in the proteolytic maturation of farnesylated proteins; peptidase family U48
TI4896S003823	34/F09		-1.31	SPAC823.03	SPAC1E11.03	serine/threonine protein kinase
TI4896S000518	29/B08		-1.31	SPCC622.10c		sequence orphan; hypothetical protein
TI4896S004175	50/F03		-1.31	SPAC3H5.11		NAD/NADH kinase; ATP dependent; involved in nicotinamide metabolism; similar to Sp SPAC1B1.02C and SPCC24B10.02C
TI4896S001236	45/H12		-1.31	SPBC646.04	pla1	poly(A) polymerase; nucleotidyltransferase; involved in polyadenylation
TI4896S002627	14/B10		-1.31	SPBC342.04		conserved hypothetical protein; membrane glycoprotein; no apparent Sc ortholog; non-essential
TI4896S001021	49/E02		-1.31	SPBC1271.02	stt3	oligosaccharyltransferase subunit; functional homolog of Sc YGL022W; involved in glycosylation; involved in the regulation of oligosaccharyltransferase activity; essential
TI4896S002648	51/G02		-1.31	SPBC16G5.19		very hypothetical protein
TI4896S002927	40/H02		-1.30	SPAC13C5.07	rad32	exonuclease; involved in DNA repair; involved in double-strand break repair (required); involved in meiotic recombination (required); involved in meiotic gene conversion (required); involved in end joining; involved in telomere maintenance; involved in telomerase-dependent telomere maintenance; involved in DNA damage sensitivity; involved in DNA replication; Mre11 complex (multisubunit endonuclea…
TI4896S002535	17/H01		-1.30	SPBC26H8.12		cytochrome c heme lyase
TI4896S002915	19/G01		-1.30	SPAC31A2.11c	cuf1	Cu metalloregulatory transcription factor; involved in iron homeostasis; copper fist; DNA-binding domain; regulates copper transporter gene expression through an Ace1/Amt1-like recognition sequence; similar to Sp SPCC584.02; functionally complements Sc MAC1
TI4896S004163	17/A01		-1.30	SPAC959.02	sec17	alpha SNAP; involved in intracellular protein transport; involved in ER to golgi transport; NSF attachment protein; involved in secretory pathway; involved in vacuole fusion; similar to S. cerevisiae YBL050W
TI4896S004587	11/A05		-1.30	SPAC17C9.14		involved in peroxisome biogenesis; farnesylated protein
TI4896S001323	28/G11		-1.30	SPBC1709.15c		CFII component; involved in polyadenylation
TI4896S004847	38/H01		-1.30	SPAC1006.03c		hypothetical protein; sequence orphan; predicted coiled-coil
TI4896S000677	12/C03		-1.30	SPCC285.08	ret2	coatomer (delta subunit) (putative); Sp gene appears to be truncated ***possible deletion check***
TI4896S003038	46/C01		-1.30	SPAC1296.06		NADPH cytochrome reductase
TI4896S000468	48/B01		-1.30	SPCC1322.06		karyopherin; importin-beta family; similar to human RAN binding protein 11; structural constituent of nuclear pore
TI4896S003739	26/H05		-1.29	SPAC22H10.09		sequence orphan; hypothetical protein
TI4896S004665	07/G12		-1.29	SPAC144.08		chaperone; DNAJ domain protein; similar to E. coli Hsc20 co-chaperonin
TI4896S003122	15/F07		-1.29	SPAC1687.12c	coq4	involved in ubiquinone biosynthesis
TI4896S000739	16/G10		-1.29	SPCC290.02	rpc34	DNA-directed RNA polymerase III (subunit)
TI4896S000104	25/C07		-1.29	SPCC553.01c	SPCC736.01c	conserved hypothetical; hypothetical protein; possibly involved in signal transduction, as the only detectable defect of the null mutant of the S. cerevisiae homolog YGR042w is in heterologous signal transduction
TI4896S000409	47/B12	Lethal	-1.29	SPCC4B3.15	dmf1; mid1	involved in cytokinesis (required); involved in septation (required); expression peaks at M-G1 phase; regulated by PBF transcription complex; involved in contractile ring positioning; non-essential; pleckstrin homology domain; no apparent orthologs
TI4896S003522	50/C04		-1.28	SPAPB1A10.15		Arv1-like family protein; similar to S. cerevisiae YLR242C; 4 predicted transmembrane helices; involved in sterol uptake; involved in sterol distribution; involved in G1/S and G2/M phase transition (Q9H2C2); involved in sphingolipid metabolism
TI4896S003131	27/E07		-1.28	SPAC1687.20c	mis6	inner centromere protein; involved in chromosome segregation, sister chromatid segregation (G1/S phase)
TI4896S002351	12/D11		-1.28	SPBC1105.15c		conserved hypothetical; hypothetical protein
TI4896S003059	27/E04		-1.28	SPAC4G8.07c		uridine methyltransferase; catalyzes the formation of ribothymidine in tRNAs
TI4896S000244	01/H06		-1.28	SPCC16C4.20c		hypothetical protein; sequence orphan
TI4896S000653	36/G03		-1.28	SPCC1450.14c		involved in protein disulfide bond formation
TI4896S002832	07/C02		-1.28	SPAC24B11.03	aps1; SPAC13G6.14	diadenosine 5',5'''-p1,p6-hexaphosphate hydrolase; dual function MutT hydrolase; involved in inositol polyphosphate hydrolysis; non-essential; deletion mutant results in decreased in vitro Ap6A hydrolase activity; degrades PP-InsP5; degrades [PP]x-InsPx
TI4896S003828	21/F05		-1.28	SPAC823.08c		ATP-dependent RNA helicase; DEAD/DEAH box helicase; involved in rRNA processing
TI4896S003016	27/G02		-1.28	SPAC1D4.11c	lkh1	dual specificity protein kinase; regulates the cell surface formation, septum formation
TI4896S000641	35/H03	Lethal	-1.28	SPCC1450.02	SPCC191.13	bromodomain protein; involved in transcriptional regulation; RNA polymerase II accessory protein
TI4896S004761	45/D12		-1.28	SPAC19B12.02c		GPI anchored protein (pers. comm. Birgit Eisenhaber); glycosidase; involved in the regulation of the crosslinking of beta-1,6-glucans in the cell wall; glycoprotein; similar to Sp SPBC29A10.08
TI4896S002227	35/F07		-1.27	SPBC19F8.06c	meu22	meiotic expression upregulated; amino acid permease family; similar to Sp SPAP7G5.06 and SPAC869.11 and SPBC359.01 and SPBC359.01 and SPBPB2B2.01 and isp5
TI4896S001599	07/C01		-1.27	SPBC11G11.06c	sme1	small nuclear ribonucleoprotein E; involved in mRNA splicing
TI4896S002149	25/B07		-1.27	SPBC30D10.15		nuclear assembly factor; involved in snoRNP biogenesis; complexed with Shq1p
TI4896S005019	05/C09		-1.27	SPAC186.04c		putative pseudogene; similar to N-terminal of transmembrane channel
TI4896S000521	48/B09	Lethal	-1.27	SPCC622.13c		hypothetical protein
TI4896S001718	16/G08		-1.26	SPBC29A3.13		conserved hypothetical; PWWP domain protein; involved in cell growth; similar to Sp SPBC215.07C and SPAC23D3.01
TI4896S004717	16/D11		-1.26	SPAC11H11.03c		conserved hypothetical; conserved protein; small mutS related proteins domain; involved in DNA repair
TI4896S000233	28/G09		-1.26	SPCC31H12.07	sec231; sec23a; SPCC5E4.01	GTPase activator; zinc-binding protein; involved in intracellular protein transport; COPII-coated vesicle component; involved in ER to Golgi transport; similar to Sp SPBC776.04
TI4896S003842	10/F07		-1.26	SPAC7D4.09c		involved in cell polarity
TI4896S000655	25/A07		-1.26	SPCC1450.16c		phospholipase; triacylglycerol lipase; patatin domain
TI4896S000788	35/E07		-1.26	SPCC126.03	lps1	pseudouridylate synthase; suppressor of a thermosensitive Sc los1 pus1 double mutant; pseudouridine formation in tRNA (Trp) at position 27
TI4896S004615	39/B05		-1.26	SPAC637.02c	tpr1; SPAC27D7.14c	tetratricopeptide repeat protein TPR repeat protein; involved in regulation of transcription elongation; RNA polymerase II associated Paf1 complex; involved in potassium transport
TI4896S004029	10/A05		-1.26	SPAC24C9.10c		mitochondrial ribosomal protein S2
TI4896S004904	30/C03		-1.25	SPAC14C4.02c	spr18	SMC family protein; possibly dimerizes with rad18
TI4896S003407	41/A11		-1.25	SPAP27G11.10c	nup184	nuclear pore complex; involved in mRNA export
TI4896S000847	28/B04		-1.25	SPCC1840.05c		phosphomannomutase
TI4896S001582	32/D09		-1.25	SPBC2F12.09c	atf21	atf creb-family transcription factor; bZIP (basic leucine zipper) transcription factor family; involved in regulation of conjugation (regulation), regulation of meiosis; similar to Sp atf1 and pcr1 (paralogs); no apparent Sc ortholog
TI4896S004756	02/F02		-1.25	SPAC4F10.17		hypothetical protein
TI4896S004195	36/E10		-1.25	SPAC3A11.02	scp3	zinc finger protein; zf-CCCH type; spindle poison (isopropyl N-3-chlorophenyl carbamate) sensitivity protein
TI4896S004887	02/B07		-1.25	SPAC26F1.05		sequence orphan; has transcript profile on microarray
TI4896S000970	31/A11		-1.24	SPBC31E1.01c	SPBC660.18c	zinc finger protein; zf-fungal Zn(2)-Cys(6) binuclear cluster domain; involved in autophagy, sporulation, and protein-vacuolar targeting
TI4896S002953	25/B10		-1.24	SPAC227.07c	pab1	protein phosphatase pp2a regulatory subunit b; involved in cellular morphogenesis; involved in cell wall biosynthesis; involved in cytokinesis; WD repeat protein
TI4896S004246	28/D03		-1.24	SPAC17G6.05c		endosome associated protein; involved in intracellular protein transport; involved in signal transduction; BRO1-like domain
TI4896S003518	50/H06		-1.24	SPAPB1A10.11c		glutamyl-tRNA synthetase; involved in glutamyl-tRNA aminoacylation; glutamate-tRNA ligase activity
TI4896S003662	34/D03		-1.24	SPAC18G6.05c		HEAT repeat; involved in translational activation
TI4896S001630	27/D02		-1.24	SPBC28E12.02	SPBC9B6.13	conserved hypothetical protein
TI4896S002112	30/H10		-1.24	SPBC2D10.14c	myo51	class V myosin; involved in septation, cytokinesis, contractile ring assembly; IQ domains; DIL domain
TI4896S002417	38/D11		-1.24	SPBP8B7.30c		transcriptional regulator; zinc finger protein; zf-fungal Zn(2)-Cys(6) binuclear cluster domain; predicted membrane-tethered transcription factor; NLS (bipartite)
TI4896S004820	30/F01		-1.24	SPAC890.06		nucleoporin; nuclear pore complex
TI4896S002830	38/F11		-1.24	SPAC13G6.12c	chs1; SPAC24B11.01c	chitin synthase 1; chitin synthase activity; essential; involved in sporulation (required)
TI4896S002861	31/B07		-1.23	SPAC1F5.04c	cdc12	formin; actin-binding protein; essential; profilin-binding protein; interacts physically with Cdc3p; involved in contractile ring assembly, cytokinesis, cell polarity, F-actin capping, and actin nucleation; ts mutant has defective septum pattern; similar to Sp fus1 and for1; possibly travels on both microtubule and actin networks to the future site of cell division
TI4896S002534	05/C12		-1.23	SPBC26H8.11c		hypothetical protein; similar to Sp SPAPB2B4.06
TI4896S002062	32/G06	Lethal	-1.23	SPBP4H10.09	rsv1	transcription factor; zinc finger protein; zf-C2H2 type; stationary phase viability protein; required for cell viability in glucose starved environment; similar to Sp src1 (paralog)
TI4896S003137	13/F05		-1.23	SPAC222.06		nuclear HMG-like acidic protein; involved in ribosome biogenesis and assembly
TI4896S001823	39/F05		-1.23	SPBC16H5.03c	uba2	ubiquitin-activating enzyme E1-like ubiquitin activating enzyme; e1-like
TI4896S003247	37/B11		-1.23	SPAC10F6.03c		CTP synthase
TI4896S004812	03/H02		-1.23	SPAC1952.14c		mitochondrial ribosomal protein L25
TI4896S000228	12/H01		-1.23	SPCC31H12.02c		putative ion channel; conserved protein; similar to heat shock protein
TI4896S003585	05/C08		-1.22	SPAC607.03c	snu13; rph1?	putative pre-mRNA splicing factor
TI4896S001827	27/D06		-1.22	SPBC12D12.03	cct1	chaperonin-containing T-complex; chaperone; involved in protein folding
TI4896S002932	20/F06		-1.22	SPAC24H6.12c	uba3	ubiquitin activating enzyme
TI4896S001320	22/G09		-1.22	SPBC1709.12		hypothetical protein; sequence orphan
TI4896S000483	30/D03		-1.22	SPCC132.04c		glutamate dehydrogenase; involved in glutamate metabolism
TI4896S003377	48/B07		-1.22	SPAC167.01		serine/threonine protein kinase; involved in unfolded protein response
TI4896S003108	31/H09		-1.22	SPAC22H12.04c	rps102; rps3a-2; rps1-2	40S ribosomal protein S3a.2/S1B
TI4896S004036	04/B05		-1.22	SPAC16A10.02		transcriptional activator p15(PC4); has a bipartite structure composed of an amino-terminal regulatory domain and a carboxyl; terminal cryptic DNA-binding domain (Pfam); regulated by protein kinases (Pfam); involved in transcription initiation; involved in the release of TFIIB; binds to TFIIB (SWISSPROT)
TI4896S003667	36/D11		-1.21	SPAC18G6.11c	rrn3	RNA polymerase I specific transcription initiation factor
TI4896S005036	52/D12		-1.21	SPAC212.04c		S. pombe specific families
TI4896S003586	43/C10		-1.21	SPAC607.04		inositol polyphosphate kinase; involved in arginine metabolism regulation
TI4896S003054	28/D08		-1.21	SPAC4G8.03c		RNA-binding protein; pumilio family; similar to Sp SPAC6G9.14
TI4896S003231	46/B08		-1.21	SPAC22A12.08c		CDP-alcohol phosphatidyltransferase
TI4896S004093	30/D12		-1.21	SPAC6G10.02c	tea3	predicted coiled-coil; similar to Sp tea1; involved in NETO; predicted cell end marker required to activate polarized cell growth at the second end during NETO
TI4896S001062	22/D02		-1.21	SPBC428.11		homocysteine synthase; non-essential; involved in sulfur metabolism (regulation)
TI4896S001850	34/H04		-1.20	SPBC19G7.06		MAD box transcription factor; no apparent Sc ortholog
TI4896S000886	09/F11		-1.20	SPCC70.07c	tmp1; tmp	thymidylate kinase; functionally complements Sc CDC8
TI4896S000161	37/C07		-1.20	SPCC4G3.10c	rhp42; rhp4b	involved in DNA repair; involved in nucleotide-excision repair; involved in mismatch repair; XP-C family; similar to Sc YER162C; similar to Sp rhp41 (paralog)
TI4896S002190	48/E03		-1.20	SPBC609.01		hypothetical protein; ribonuclease II (RNB ribonuclease II (RNB) family; similar to Sp SPAC2C4.07c; similar to C. elegans f48e8.6; no apparent Sc ortholog
TI4896S003387	16/C09		-1.20	SPAC23H4.12	alp13	chromodomain protein; MRG family; involved in cell polarity (required); histone acetyltransferase complex; involved in histone deacetylation; involved in chromatin silencing; involved in chromatin assembly/disassembly
TI4896S003408	01/E02		-1.20	SPAP27G11.11c		very hypothetical protein
TI4896S003760	36/H11		-1.20	SPAC6B12.12		mitochondrial outer membrane translocase complex; involved in mitochondrial outer membrane protein import; TPR repeat protein; mitochondrial import receptor
TI4896S003420	27/B10		-1.20	SPAC343.07		RNA-binding protein; similar to Sp crp79
TI4896S002990	48/B10		-1.19	SPAC3H8.05c		hypothetical protein; sequence orphan
TI4896S003461	29/F12		-1.19	SPAC17A5.01		peroxin-6; AAA family ATPase; involved in peroxisome biogenesis
TI4896S000961	02/B08		-1.19	SPBC660.09		hypothetical protein; sequence orphan; has transcript profile on microarray
TI4896S003695	38/C04		-1.19	SPAC13G7.01c	erg7; SPAC4G9.21c	lanosterol synthase activity; involved in ergosterol biosynthesis
TI4896S003913	15/C11		-1.19	SPAC1805.09c		methionyl-tRNA formyltransferase
TI4896S003048	19/G12		-1.19	SPAC22G7.07c		conserved hypothetical; conserved protein; no apparent Sc ortholog
TI4896S003790	03/B08		-1.19	SPAC23H3.07c		mitochondrial ribosomal protein S14
TI4896S001523	35/C08		-1.19	SPBC83.16c		conserved protein
TI4896S001834	46/B11		-1.19	SPBC24C6.02		putative ATP dependent RNA helicase DEAD/DEAH box helicase; ATP-dependent; RNA helicase; helicase C-terminal domain; involved in 35S transcript processing; involved in ribosome biogenesis and assembly
TI4896S003833	13/D09		-1.19	SPAC823.13c		predicted coiled-coil protein; involved in inner mitochondrial membrane organization and biogenesis
TI4896S002352	01/G04		-1.18	SPBC1105.16c		RNase P subunit; possibly involved in tRNA processing
TI4896S003882	50/E05	Lethal	-1.18	SPAPB2B4.03	cig2; cyc17	Cig2/Cyc17 B-type cyclin; G2/mitotic-specific cyclin; G1/S promoting complex; regulated by DSC1/MBF complex; expressed at G1-S phase; involved in conjugation (regulation); involved in start control point of mitotic cell cycle
TI4896S000220	45/D07		-1.18	SPCC1183.04c		involved in mitochondrial translation; involved in mitochondrial RNA processing
TI4896S003600	27/A01		-1.18	SPAC3C7.06c	pit1	serine/threonine protein kinase; involved in sporulation; putative MAK; similar to Sp mde3
TI4896S003188	51/G05		-1.18	SPAC1A6.11		very hypothetical protein
TI4896S004846	17/D08		-1.18	SPAC1006.02		WD repeat protein; no apparent Sc ortholog
TI4896S003149	23/E05		-1.17	SPAC821.03c		hypothetical serine-rich protein; sequence orphan
TI4896S004425	27/E01		-1.17	SPAC23A1.01c	SPAC19G12.16c	Sp specific; serine/threonine-rich protein; glycoprotein; similar to alpha agglutinins; localization cell surface; GPI anchored protein
TI4896S002226	42/G04		-1.17	SPBC19F8.05		hypothetical protein; sequence orphan
TI4896S000874	47/E09		-1.17	SPCC1494.05c	ubp12	ubiquitin C-terminal hydrolase activity; involved in protein deubiquitination; involved in proteolysis (regulation) (supression); similar to Sp SPCC16A11.12c
TI4896S002115	48/E09		-1.17	SPBC2D10.17		protein with possible zinc finger protein; zf-C2H2 type; predicted coiled-coil region
TI4896S001266	34/A12		-1.17	SPBC146.03c	cut3	condensin subunit; SMC4 subunit; essential; involved in chromosome segregation (required) (mitosis); involved in chromosome condensation (required) (mitosis); NTP binding motif; phosphorylated by Cdc2p
TI4896S002396	47/E08		-1.17	SPBP8B7.09c		exportin t; pre-tRNA nucleus export receptor; involved in tRNA-nucleus export; involved in tRNA splicing
TI4896S000751	43/B02		-1.16	SPCC1739.02c		mitochondrial ribosomal protein
TI4896S002710	24/A11		-1.16	SPBC1289.06c		hypothetical protein
TI4896S003094	50/A04		-1.16	SPAC23G3.02c		peptide synthetase; phosphopantetheine attachment site (3); no apparent Sc ortholog
TI4896S002528	04/B01	Lethal	-1.16	SPBC26H8.13c		very hypothetical protein; sequence orphan
TI4896S002339	07/D11		-1.16	SPBC1105.03c		mitochondrial ribosomal protein L16
TI4896S001235	24/E01		-1.16	SPBC646.03		glutamyl-tRNA amidotransferase complex
TI4896S002333	32/F07		-1.16	SPBC1718.07c	zfs1	zinc finger protein; zf-CCCH type; mating pheromone recognition pathway; non-essential; required to prevent septation if mitotic progression is inhibited
TI4896S002010	44/H03		-1.16	SPBC336.11		GARP complex; involved in protein sorting in the late Golgi; possibly interacts with actin; similar to S. cerevisiae YDR484W
TI4896S000218	13/C03		-1.15	SPCC1183.02		glutathione S-transferase (putative); similar to the N-terminal of translation elongation factors
TI4896S004889	22/C01		-1.15	SPAC26F1.03	pda1	pyruvate dehydrogenase e1 component (alpha subunit); involved in acetyl-CoA biosynthesis from pyruvate; pyruvate dehydrogenase (lipoamide) activity
TI4896S002306	37/G08		-1.15	SPBC4B4.09	prp39	U1 snRNA-associated protein; involved in mRNA splicing
TI4896S004255	22/G01	Lethal	-1.14	SPAC17G6.14c	uap56	DEAD/DEAH box helicase; ATP dependent; RNA helicase; involved in mRNA splicing; involved in mRNA export; TREX complex; involved in coupling transcription to mRNA export; THO complex associated
TI4896S003093	39/B12		-1.14	SPAC23G3.01	rpb2; SPAC521.06	DNA-directed RNA polymerase II 138 k DNA-directed RNA polymerase II (subunit); involved in transcription from Pol II promoter; DNA-directed RNA polymerase activity (function of complex); DNA-binding activity (function of complex); RNA binding activity; interacts physically with Rpb3p; interacts physically with Rpb11p
TI4896S000317	25/C01		-1.14	SPCC63.10c		dolichol kinase; involved in N-linked glycosylation
TI4896S003727	16/E03		-1.14	SPAC17G8.11c		mannosyltransferase; involved in the mannosylation of sphingolipids; similar to Sp SPCC4F11.04c (paralog)
TI4896S000076	34/E10		-1.14	SPCC548.06c		hexose transporter; similar to Sp GHT1 and GHT2 and GHT4 and GHT5 and GHT6 and GHT3 and SPBC1348.14C; tandem duplication
TI4896S002168	46/C02		-1.14	SPBC1778.06c	fim1	fimbrin; calponin homology (CH) domain; EF hand motifs; calcium binding protein; involved in actin cytoskeletal organization; involved in cell polarity; involved in cytokinesis; involved in contractile ring assembly; actin cortical patch component
TI4896S000957	03/E12		-1.13	SPBC660.05		glycine rich protein; WW domain; paralog?
TI4896S003126	40/F09		-1.13	SPAC1687.15	gsk3; skp1	serine/threonine protein kinase; glycogen synthase kinase 3 (GSK-3) family; involved in cytokinesis; interacts physically with Cdc14p; involved in mitosis (progression); phosphorylated at S-335; non-essential; deletion mutant sensitive to heat shock; deletion mutant results in sporulation defects; overexpression suppresses cdc14-118 cytokinesis defect; similar to Sp gsk31
TI4896S004556	48/D02		-1.13	SPAC30.07c	uso1; SPAC29E6.03c	involved in intracellular protein transport; involved in ER to Golgi transport; armadillo repeat protein (inferred from context); predicted coiled-coil region
TI4896S000371	42/C03		-1.13	SPCC1795.07		mitochondrial ribosomal protein S13
TI4896S002636	22/A12		-1.13	SPBC16G5.07c		prohibitin; involved in cell aging; involved in proteolysis; no apparent Sc ortholog; non-essential
TI4896S002085	11/A04		-1.12	SPBC1703.11		conserved hypothetical protein; similar to A. thaliana F9D24.60 and F3M18.5, H. sapiens HRC01029, D. melanogaster CG13601; conserved KL..L.{ILV}{KR}{TQH}{LIV}{KR}..{SC}KP{IL}{AG}{NS}.{IL}K.. AK.*F{RK}; predicted coiled-coil protein; no apparent Sc ortholog
TI4896S002233	41/B02		-1.12	SPBC25H2.13c	cdc20; pol2	DNA polymerase epsilon (catalytic subunit a); involved in telomere maintenance
TI4896S000401	37/G02		-1.12	SPCC1259.11c		TBC domain protein; GTPase activating protein of Rab-like GTPase; EF hand motif (context dependent)
TI4896S001391	37/D06		-1.12	SPBC3D6.04c		predicted coiled-coil protein; involved in spindle assembly checkpoint
TI4896S002571	07/H06		-1.11	SPBC215.14c		involved in intracellular protein transport; SNF7 family; class E vps; predicted coiled-coil
TI4896S003862	13/B01		-1.11	SPAC4F8.03	SPAC644.01c	conserved hypothetical; hypothetical protein; UPF0023 family
TI4896S001411	33/H01		-1.11	SPBC27B12.04c		conserved hypothetical; hypothetical protein
TI4896S004662	30/G08		-1.11	SPAC144.05		zf-C3HC4 type; ubiquitin ligase; SNF2 family; DEAD/DEAH box helicase; involved in DNA repair; similar to Sp rad8
TI4896S002271	46/G01		-1.11	SPBC11C11.02	imp2	involved in contractile ring assembly; non-essential; involved in cytokinesis; FCH domain; src (SH3) homology domain; similar to Sp SPAC20G8.05C; involved in septation (required)
TI4896S003517	41/H12		-1.10	SPAPB1A10.10c	ypt71	GTP-binding protein; involved in endocytosis; small GTPase; Rab subfamily
TI4896S002606	45/C02		-1.10	SPBC1861.09		ole inferred from homology; serine/threonine protein kinase
TI4896S003613	39/F08		-1.10	SPAC631.02		protein with 2 bromodomains; putative bromodomain protein
TI4896S001288	21/E08		-1.09	SPBC337.12		zinc finger protein; zf-CCCH type (4); involved in polyadenylation
TI4896S002051	49/H10		-1.09	SPBP19A11.04c	mor2; cps12	involved in transcriptional regulation; involved in cellular morphogenesis (required); mutation induces Wee1-dependent G2 delay; complexed with Orb6p (ISS); similar to D. melanogaster Furry
TI4896S000258	15/E12		-1.09	SPCC16C4.15		mitochondrial ribosomal protein L2
TI4896S004798	45/D05		-1.08	SPAC1B3.17		sequence orphan; hypothetical protein
TI4896S004850	30/E10		-1.08	SPAC1006.06	rgf2	GDP-GTP exchange protein for Rho1p; pleckstrin homology domain; CNH domain; non-essential; overexpression causes defects in cell separation
TI4896S004585	34/F06		-1.08	SPAC17C9.16c	SPAC9E9.16	membrane transporter; unknown specificity; similar to Sp SPBC609.04 (paralog)
TI4896S003477	48/B06		-1.08	SPAC17A5.16		conserved eukaryotic protein; no apparent Sc ortholog
TI4896S001212	05/G01		-1.08	SPBC36.10		phenylalanyl-tRNA synthetase (alpha subunit); phenylalanine-tRNA ligase activity; involved in protein biosynthesis
TI4896S000036	24/D04		-1.08	SPCC330.07c		transporter; unknown specificity; no apparent Sc ortholog; (old-> MFS efflux transporter of unknown specificity)
TI4896S002833	04/F09		-1.07	SPAC24B11.04c	SPAC13G6.15c	calcipressin; calcineurin-binding protein; involved in calcium-mediated signalling; calcineurin complex
TI4896S003730	30/B06		-1.07	SPAC22H10.01c	pck1; SPAC17G8.14c	protein kinase C-like; Phorbol esters/diacylglercerol binding domain
TI4896S002004	17/H10		-1.07	SPBC336.05c		hypothetical protein; Pfam-B PB009048 domain; no apparent Sc ortholog
TI4896S003659	47/D04		-1.07	SPAC18G6.02c	chp1	chromodomain protein; involved in centromeric silencing (required); involved in chromosome segregation (required); interacts genetically with alpha-tubulin; binds centromeric flanking sequence
TI4896S002397	19/A11		-1.07	SPBP8B7.10c		conserved hypothetical protein; possibly involved in protein synthesis ?????; coiled-coil?
TI4896S003196	25/G04		-1.07	SPAC30D11.14c		conserved hypothetical; KH domain; no apparent Sc ortholog
TI4896S001743	13/D01		-1.07	SPBC23G7.07c		conserved hypothetical protein
TI4896S004440	48/G09		-1.06	SPAC23A1.17		hypothetical protein; extensin-like; with SH adaptor protein; homolog of Wiskott-Aldrich syndrome protein-interacting protein (WIP); src (SH3) homology domain; actin cortical patch component; possibly antagonistically regulate the type I myosins
TI4896S003061	38/F10		-1.06	SPAC4G8.09		leucine-tRNA ligase; involved in leucyl-tRNA aminoacylation; leucine-tRNA ligase activity
TI4896S001802	26/A08		-1.06	SPBC15C4.04c		amino acid permease family; similar to Sp SPAPB24D3.02C and SPCC74.04 and SPAC1039.01 and SPAC11D3.08C and SPCC584.13 and SPAC9.10 and SPCC794.03
TI4896S004790	37/F03		-1.06	SPAC1B3.10c		SEL1 repeat protein; possibly extracellular by similarity to C. elegans sel-1; no apparent Sc ortholog
TI4896S004948	48/E12		-1.06	SPAP8A3.12c		tripeptidylpeptidase; peptidase family S8; non-essential; no apparent Sc ortholog
TI4896S004728	22/H08		-1.06	SPAC22F8.09		conserved protein; similar to human GLTSCR2 glioma tumor suppressor candidate region protein2
TI4896S001818	32/G03		-1.05	SPBC16H5.07c	ppa2	serine/threonine protein phosphatase; catalytic subunit
TI4896S000434	09/A09		-1.05	SPCC550.08		N-acetyltransferase; no apparent Sc ortholog
TI4896S003655	40/F06		-1.05	SPAC1783.07c	pap1	ap-1-like transcription factor; bZIP (basic leucine zipper) transcription factor family; stress induced transcription factor; involved in oxidative stress response (required)
TI4896S003720	08/E06		-1.05	SPAC17G8.04c		ARP2/3 actin-organizing complex; involved in actin cortical patch assembly; involved in actin assembly and function
TI4896S001439	33/D04		-1.05	SPBC8D2.01	gsk31; pi064	serine/threonine protein kinase; glycogen synthase kinase 3 (GSK-3) family; similar to Sp gsk3
TI4896S003315	30/A01		-1.05	SPAC20G8.05c	cdc15	phosphoprotein; essential; involved in cytokinesis, septation,reorganization of F-actin at mitosis; similar to Sp SPBC11C11.02
TI4896S003308	13/H03		-1.05	SPAC57A10.10c	sla1	La protein homolog; RNA-binding protein; phosphoprotein; non-essential; involved in tRNA maturation; rrm RNA recognition motif
TI4896S000160	13/D04		-1.04	SPCC4G3.11		conserved hypothetical protein
TI4896S002655	15/F01		-1.04	SPBC16A3.14		superoxide dismutase; similar to Sp SPBC3H7.04 (paralog)
TI4896S003945	47/G08		-1.04	SPAC8F11.03	swi4	MutS family; involved in mating-type determination
TI4896S004481	30/F06		-1.04	SPAC1F7.01c	SPAC694.07c	involved in establishment and/or maintenance of chromatin architecture; SH2 domain; S1 domain; CSZ domain (SMART)
TI4896S002440	48/H09		-1.04	SPBC13G1.10c		DEAD/DEAH box helicase; helicase C-terminal domain; Sec63 domain; involved in mRNA stability; involved in mRNA processing
TI4896S002349	03/E06		-1.04	SPBC1105.13c		hypothetical protein; sequence orphan; low correlation score; has transcript profile on microarray
TI4896S000806	18/H04		-1.04	SPCC1620.06c		ribose-phosphate pyrophosphokinase
TI4896S002801	39/C08		-1.04	SPAC11D3.14c		putative oxoprolinase oxoprolinase; similar to Sp SPAC11D3.15 (paralog)
TI4896S003070	25/G07		-1.03	SPAC16C9.04c		basal transcriptional regulator; zinc finger protein; zf-CCCH type; CCR4-Not complex; rrm RNA recognition motif; RNA-binding protein
TI4896S004555	26/B11		-1.03	SPAC30.06	prp3; SPAC29E6.02	U4/U6 small nuclear ribonucleoprotein; involved in mRNA splicing
TI4896S000189	29/H07		-1.02	SPCC10H11.01	prp11	DEAD/DEAH box helicase; RNA helicase; involved in mRNA splicing (IGI)
TI4896S004097	20/B12		-1.02	SPAC6G10.06		amino acid oxidase; similar to Sp SPAC1F5.03C
TI4896S002862	20/H05		-1.02	SPAC1F5.03c		oxidoreductase; similar to D-amino-acid oxidases
TI4896S004760	38/D07		-1.02	SPAC19B12.01	SPAC4F10.21	hypothetical protein; TPR repeat protein
TI4896S002323	25/F12		-1.02	SPBC2G2.14		sequence orphan; hypothetical protein
TI4896S001900	13/E09		-1.02	SPBC17F3.03c	SPBC12C2.01c	hypothetical protein; sequence orphan
TI4896S005005	35/H10		-1.02	SPAC922.08c	SPAC869.11	APC amino acid transporter (putative); similar to Sp SPBC359.01C and SPBC359.03C and SPAP7G5.06 and SPBPB2B2.01 and ISP5(paralog); closely related paralogous family; amino acid permease family; similar to Sp SPAP7G5.06 and SPBC359.01 and meu22 and SPBPB2B2.01 and isp5
TI4896S001917	46/G02		-1.02	SPBC365.10		actin-like protein; involved in intracellular protein transport; involved in protein-vacuolar targeting
TI4896S003232	35/C02		-1.01	SPAC22A12.09c	sap114	involved in mRNA splicing; Surp domains; complexed with Cdc5p
TI4896S003564	48/E01		-1.01	SPAC17H9.01	cid16	nucleotidyltransferase; caffeine induced death protein; cid1-related; non-essential; no apparent Sc ortholog
TI4896S001635	40/D07		-1.01	SPBC3H7.15	hhp1	serine/threonine protein kinase; casein kinase I; involved in DNA repair (regulation) (required)
TI4896S001958	39/E09		-1.01	SPBC6B1.01c	SPBC1826.01c; SPBC25B2.12c	probable helicase
TI4896S003222	05/D02		-1.01	SPAC56F8.15		very hypothetical protein
TI4896S001857	23/E08		-1.01	SPBC19G7.13		Myb family; DNA binding protein; involved in telomere maintenance; involved in telomerase-dependent telomere maintenance
TI4896S003936	48/G05		-1.01	SPAC3F10.11c		ABC transporter family; transporter activity; similar to Sp SPBC359.05
TI4896S001835	20/D12		-1.00	SPBC24C6.03		proline-tRNA ligase; involved in prolyl-tRNA aminoacylation; proline-tRNA ligase activity
TI4896S001255	48/D11		-1.00	SPBP35G2.06c		nucleoporin; nuclear pore complex (putative)
TI4896S004346	30/C05		-1.00	SPAC1071.02		involved in DNA repair; nucleotide-excision repair; interacts with transcription factor TFIIH
TI4896S001256	33/F03		-1.00	SPBP35G2.07	ilv1	acetolactate synthase subunit; valine and isoleucine biosynthesis pathway (1st step); functionally complements Sc ILV2
TI4896S003941	27/B01		-1.00	SPAC3F10.16c		GTPase; involved in ribosome biogenesis
TI4896S004624	26/H08		-0.99	SPAC637.11		RNA helicase; ATP-dependent
TI4896S002892	38/A11		-0.99	SPAC630.05		TBC domain protein; GTPase activating protein of Rab-like GTPase
TI4896S004899	34/D06		-0.99	SPAC19D5.04		HECT domain; ubiquitin-protein ligase (E3)
TI4896S000719	04/D12		-0.99	SPCC74.05	rpl2702; rpl27b; rpl27-2	60S ribosomal protein L27
TI4896S004059	30/A10		-0.99	SPAC688.07c		serine-rich protein
TI4896S002780	02/C06		-0.99	SPAPJ695.01c	SPAP695.01c	33896 domain; possibly Sp specific; telomeric duplication
TI4896S004416	46/F08		-0.98	SPAC19G12.07c		involved in mRNA splicing (implicated); no apparent Sc ortholog; rrm RNA recognition motif; RNA-binding protein
TI4896S004799	07/G01		-0.98	SPAC1B3.18c		mitochondrial ribosomal protein S11
TI4896S003049	34/G08		-0.98	SPAC22G7.08		serine/threonine protein kinase; similar to Sp SPAC1020.10
TI4896S000713	47/A02		-0.98	SPCC74.08c	hmt1; SPCC737.09c	ABC transporter family; heavy metal ion transporter; ATP-binding cassette-type vacuolar membrane transporter; involved in heavy metal tolerance (required)
TI4896S003314	46/B01		-0.98	SPAC20G8.04c		electron transfer flavoprotein-ubiquinone oxidoreductase
TI4896S004079	23/E04		-0.98	SPAC3G9.13c		tryptophan-tRNA ligase; involved in tryptophanyl-tRNA aminoacylation; tryptophan-tRNA ligase activity
TI4896S001216	49/A09		-0.97	SPBC713.03		mitochondrial D-lactate dehydrogenase (cytochrome)
TI4896S004689	39/F03		-0.97	SPAC17D4.02	sna41; goa1	Cdc45 related protein pre-replicative complex; involved in DNA replication (initiation); involved in loading of DNA polymerase alpha onto MRC complex (required); essential; chromatin binding during S phase
TI4896S001088	17/B02		-0.97	SPBC1685.11		involved in DNA repair; shares conserved SGKTE[LM]LYHL (possibly ATP/GTP binding motif) with human and mouse XRCC2 protein; non-essential; no apparent Sc ortholog
TI4896S001281	33/F06		-0.97	SPBC337.05c	cct8	chaperonin-containing T-complex; T-complex protein 1 (theta subunit); involved in protein folding; involved in actin folding; involved in tubulin folding
TI4896S000965	46/B02		-0.97	SPBC660.13c	rpa1; rad11; ssb1	replication factor-A protein 1; DNA replication factor A complex
TI4896S001197	32/B08		-0.97	SPBC530.10c	anc1	adenine nucleotide carrier; mitochondrial carrier
TI4896S001987	01/C07		-0.97	SPBC4F6.08c		mitochondrial ribosomal protein (subunit L33)
TI4896S001986	27/G01		-0.97	SPBC4F6.07c		DEAD/DEAH box helicase; ATP-dependent
TI4896S003539	37/A01		-0.97	SPAC3H1.04c		conserved fungal protein
TI4896S001008	46/D10		-0.97	SPBC1271.15c		translation initiation factor if-2; non-essential
TI4896S002002	47/F03		-0.97	SPBC336.03	efc25	exchange factor Cdc25p-like; guanine nucleotide exchange factor; GEF for Ras1-Scd1 pathway; deletion can worsen the growth defect of moe1; deletion synthetically lethal with tea1 deletion
TI4896S000038	46/B05		-0.96	SPCC330.09		WD repeat protein; essential in Sc; predicted ortholog in D. melanogaster and C. elegans
TI4896S002482	47/H05		-0.96	SPBC23E6.02		zinc finger protein; zf-C3HC4 type (RING finger); ubiquitin ligase (E3); SNF2 family; DEAD/DEAH box helicase; helicase C-terminal domain; involved in DNA repair; similar to Sp SPAC17A2.12
TI4896S004181	41/B08		-0.96	SPAC3H5.05c	rps1401; rps14-1; rps14	40S ribosomal protein S14
TI4896S001328	42/B08		-0.96	SPBC409.03		involved in mating-type determination (AB089498)
TI4896S003890	23/F08		-0.96	SPAC6F6.04c		membrane transporter; no apparent Sc ortholog
TI4896S000231	23/C11		-0.96	SPCC31H12.05c	sds21	serine/threonine protein phosphatase pp1-2; similar to Sp dis2 (paralog)
TI4896S001886	37/B10		-0.96	SPBC21D10.05c		GTPase activating protein; UBA domain; involved in protein deubiquitination (implicated); ubiquitin-binding protein; overexpression supresses cdc2 mutant (pers. comm. Nancy Walworth)
TI4896S002406	29/H10		-0.95	SPBP8B7.19		FACT complex component; chromatin binding activity; involved in chromatin mediated transcriptional regulation; involved in DNA replication; involved in chromatin remodeling; chromatin assembly/disassembly; alpha DNA polymerase primase complex; involved in RNA elongation from Pol II promoter; transcription elongation factor complex
TI4896S000152	28/B12		-0.95	SPCC4G3.19	alp19	gamma tubulin complex; overexpression suppresses an alp6 ts mutant; overexpression lethal; deletion mutant sensitive to microtubule depolymerizing drugs; deletion mutant results in abnormally long cytoplasmic microtubules; similar to H. sapiens hGPC6; no apparent S. cerevisiae ortholog
TI4896S004983	34/F07		-0.95	SPAC29B12.08		sequence orphan; hypothetical serine-proline rich protein
TI4896S003502	49/B03		-0.95	SPAC1399.05c		putative involvement in maltose fermentation zinc finger protein; zf-fungal Zn(2)-Cys(6) binuclear cluster domain; involved in transcriptional regulation
TI4896S000383	23/G05		-0.95	SPCC895.08c		hypothetical protein; sequence orphan
TI4896S004748	38/E03		-0.94	SPAC4F10.09c		involved in ribosome biogenesis and assembly; CAATT-binding factor homolog
TI4896S002762	50/H01		-0.94	SPBC1348.14c	SPAC1348.14c; SPAPB8B6.01c; SPAC1348.14; SPAP8B6.01c	hexose transporter; ght7?; similar to Sp GHT1 and GHT2 and GHT4 and GHT5 and GHT6 and SPCC548.06C and GHT3
TI4896S002272	27/B05		-0.94	SPBC11C11.03	ndc10; tid3	involved in chromosome segregation; predicted coiled-coil regions; spindle pole body protein
TI4896S000296	09/F06		-0.94	SPCC1393.04		hypothetical protein; sequence orphan
TI4896S004542	46/E09		-0.93	SPAC23D3.10c	eng2	glycosyl hydrolase family 81; endo-1,3-beta-glucanase; similar to Sp eng1
TI4896S003716	20/B04		-0.93	SPAC6C3.09		hypothetical protein; low similarity to ribonuclease P protein subunit p40; no apparent Sc ortholog
TI4896S003971	01/D10		-0.93	SPAC513.04		hypothetical protein
TI4896S000310	45/E11		-0.93	SPCC63.02c		glycosyl hydrolase family 13; alpha-amylase; GPI anchored protein; glycoprotein; no apparent Sc ortholog
TI4896S001547	17/F10		-0.93	SPBC28F2.11		transcription factor; HMG box
TI4896S000162	26/F05		-0.92	SPCC4G3.09c		TBC domain protein; GTPase activating protein of Rab-like GTPase
TI4896S001045	46/F04		-0.92	SPBC582.04c		hypothetical protein; sequence orphan; non-essential
TI4896S000368	07/H11		-0.92	SPCC1795.10c		conserved hypothetical protein
TI4896S001111	37/D03		-0.92	SPBC354.14c		armadillo repeat protein; non-essential; involved in protein-vacuolar targeting
TI4896S001115	28/B10		-0.92	SPBC1706.03	SPBC839.01	putative GTPase; GTP-binding protein; possibly involved in mitochondrial fusion; involved in mitochondrial DNA (maintenance)
TI4896S000269	14/C05		-0.92	SPCC18B5.05c		involved in thiamine biosynthesis
TI4896S002882	42/F03		-0.92	SPAC12G12.08		mitochondrial ribosomal protein L6
TI4896S001751	39/G08		-0.92	SPBC23G7.15c	rpp202; rpp2-2; rpa4	60S acidic ribosomal protein p2-beta (P2B subunit); similar to Sp SPBP8B7.06 and SPAC1071.08
TI4896S001682	34/B05		-0.92	SPBC1A4.03c	top2	DNA topoisomerase II; DNA gyrase B domain
TI4896S002997	30/D07		-0.92	SPAC1F3.02c	mkh1; pmk1	serine/threonine protein kinase; involved in cell wall organization and biogenesis, osmotic stress response, heat shock respone, chloride homeostasis; sterile alpha motif (SAM)
TI4896S004217	25/D09		-0.91	SPAC16E8.11c		transcription factor TFIIH complex; general RNA polymerase II transcription factor activity; BSD domain (2)
TI4896S001759	21/D12		-0.91	SPBC1711.08		stress-regulated co-chaperone; activator of Hsp90p; interacts physically with Swo1p; conserved eukaryotic protein
TI4896S002670	33/A05		-0.91	SPBC543.02c		DNAJ domain protein; TPR repeat protein; similar to protein kinase inhibitors
TI4896S003431	45/H03		-0.91	SPAC343.17c		WD repeat protein; no apparent Sc ortholog
TI4896S004984	46/H11		-0.91	SPAC29B12.10c		OPT family oligopeptide transporter; involved in pheromone response; involved in mating-type determination
TI4896S000420	30/F02		-0.91	SPCC4B3.04c		hypothetical protein; cyclic nucleic acid binding family protein; patatin-like phospholipase
TI4896S000995	12/G04	Lethal	-0.91	SPBC1773.07c	sbp1; yrb1	spi1p GTP-binding protein; RanBP1 domain; involved in mitosis to interphase transition
TI4896S000111	26/G06		-0.91	SPCC736.08		DNA-binding protein; recombination signal specific; involved in meiotic recombination; no apparent Sc ortholog; non-essential
TI4896S001321	34/E07		-0.91	SPBC1709.13c		histone lysine methyltransferase; SET domain; similar to Sp SPAC3C7.09
TI4896S001704	21/C09		-0.90	SPBP23A10.15c	qcr1; mas1	ubiquinol cytochrome c reductase complex; cytochrome bc1 complex; respiratory complex III; putative mitochondrial processing peptidase beta (enhancing) subunit
TI4896S001812	48/A07		-0.90	SPBC16H5.13		hypothetical protein; WD repeat protein
TI4896S002613	39/D05		-0.90	SPBC14F5.07		putative mRNA stability protein zinc finger protein; zf-C3HC4 type (RING finger); ubiquitin ligase (E3); involved in mRNA stability; involved in polyadenylation
TI4896S004114	03/E08		-0.90	SPAC6G9.11	snc1	synaptobrevin; essential; involved in membrane trafficking; involved in vesicular transport (required); involved in cytokinesis; involved in cellular elongation; deletion mutant results in round cells (frequent); deletion mutant results in short cylindrical cells (frequent)
TI4896S002530	33/C09		-0.90	SPBC26H8.07c	nda3; ben1; alp12	beta tubulin; involved in control of microtubular organization; involved in sensitivity to anti-mitotic benzimidazole compounds
TI4896S002377	23/H07		-0.90	SPBC16D10.02		DNA methylase
TI4896S002858	44/G07		-0.90	SPAC1F5.07c		protoporphyrinogen oxidase
TI4896S001303	19/E03		-0.89	SPBC1734.11		mitochondrial chaperone regulator; DNAJ domain protein; DnaJ C terminal region; DnaJ central domain
TI4896S001928	51/E02		-0.89	SPBC29A10.05	exo1	exonuclease I; XP-G family; involved in DNA repair; involved in mismatch repair; 5'-3' exonuclease; functions in the same pathway as msh2 and pms1
TI4896S000901	24/G04		-0.89	SPCP1E11.04c		hypothetical protein
TI4896S002026	40/F08		-0.89	SPBC32F12.04	tug1; gtb1	tubulin gamma chain; gamma tubulin complex; involved in G1 progression (required); spindle assembly checkpoint component; involved in chromosome segregation; involved in cytokinesis; essential
TI4896S004709	11/B03		-0.89	SPAC1782.06c		prohibitin; involved in cell aging and proteolysis
TI4896S001185	29/E03		-0.89	SPBC577.13		inositol polyphosphate phosphatase family
TI4896S000299	38/E08		-0.89	SPCC1393.07c		hypothetical protein; sequence orphan
TI4896S004744	07/F03		-0.89	SPAC4F10.05c		lipoate-protein ligase B
TI4896S000830	30/G01		-0.89	SPCC1919.05		TPR repeat protein; involved in mRNA catabolism
TI4896S000463	47/D03		-0.88	SPCC1322.01	SPCC23B6.06	3'-5' exonuclease for RNA 3' ss-tail; involved in mitochondrial biogenesis
TI4896S000883	28/D09		-0.88	SPCC70.05c		serine/threonine protein kinase
TI4896S004419	29/G12		-0.88	SPAC19G12.10c	cpy1; pcy1	carboxypeptidase Y; involved in vacuolar protein sorting
TI4896S000630	27/C09		-0.88	SPCC191.02c	SPCC417.14c	acetyl-coenzyme A synthetase; AMP binding domain
TI4896S003362	46/A01		-0.88	SPAC57A7.12		heat shock protein 70 family
TI4896S003017	38/C06		-0.88	SPAC1D4.12	rhp3; rad15	transcription initiation factor TFIIH subunit; involved in DNA repair (required); involved in nucleotide-excision repair; DEAD/DEAH box helicaseXP-D family; functionally complements Sc RAD3; functionally complemented by Sc RAD3
TI4896S004836	26/H06		-0.88	SPAC22E12.14c		serine/threonine protein kinase; similar to Sp sck1 (paralog)
TI4896S000013	19/B07		-0.88	SPCC757.09c		RNA-binding protein; KH domain; involved in polyadenylation
TI4896S004675	15/G03		-0.87	SPAC144.18		nucleotide sugar transporter; involved in glycosylation
TI4896S003728	36/F09		-0.87	SPAC17G8.12		hypothetical protein; sequence orphan
TI4896S004738	44/C10		-0.87	SPAC20G4.07c	sts1	c-24(28) sterol reductase; involved in ergosterol biosynthesis; implicated in pleiotropic drug-sensitivity; implicated in divalent cation-sensitivity; implicated in osmoregulation
TI4896S002975	18/H07		-0.87	SPAC2F7.13c		tryptophan-tRNA ligase; involved in tryptophanyl-tRNA aminoacylation; tryptophan-tRNA ligase activity
TI4896S004649	50/A02		-0.87	SPAC30C2.01c	dhc1; SPAC1093.06c	dynein heavy chain, cytosolic; involved in chromosome alignment in meiotic prophase (required); involved in nuclear migration (sensu Fungi) (required)
TI4896S003211	48/B03		-0.87	SPAC56F8.03		translation initiation factor if-2
TI4896S003457	20/A06		-0.87	SPACUNK12.02c	cmk1	serine/threonine protein kinase; calmodulin kinase I homolog; CaM-dependent protein kinase; cell cycle-dependent expression; predicted regulatory site (Thr-192)
TI4896S000213	25/G03		-0.87	SPCC1672.09		triglyceride lipase-cholesterol esterase; similar to Sp SPBC16A3.12C
TI4896S001181	24/C11		-0.86	SPBC577.09		WD repeat protein; highly similar to human cockayne syndrome WD repeat protein; no apparent Sc ortholog
TI4896S003032	27/B08		-0.86	SPAC22F3.01	SPAC1296.01c	phosphoacetylglucosamine mutase; involved in N-acetylglucosamine biosynthesis, UDP-GLCNAC biosynthesis (3rd step)
TI4896S002225	08/A12		-0.86	SPBC19F8.04c		nuclease
TI4896S004084	44/C03		-0.86	SPAC1486.02c		UBA domain; possibly fungal specific
TI4896S000460	34/D04		-0.86	SPCC23B6.03c	tel1	phosphotidylinositol kinase; involved in telomere maintenance; involved in telomerase-dependent telomere maintenance
TI4896S000615	27/B12		-0.86	SPCC663.15c		sequence orphan; hypothetical protein
TI4896S001146	47/E03		-0.86	SPBC947.04		Sp specific families; glycoprotein; serine/threonine repeat; similar to Sp SPBC1289.15 and SPBC21D10.06 and SPCC188.09C and SPAP11E10.02C and SPBC21D10.06C and SPBC1348.08C and SPAC977.07C; possibly Sp specific
TI4896S001148	27/F07		-0.86	SPBC947.02	apl2	AP-1 adaptor complex subunit; adaptin family; involved in vesicle-mediated transport
TI4896S001209	48/E10		-0.86	SPBC36.07		human ikappab kinase complex associated protein; RNA polymerase II (elongator subunit); Pol II transcription elongation factor activity; transcription elongation factor complex
TI4896S004401	25/H08		-0.86	SPAC27E2.06c		methionine-tRNA ligase; involved in methionyl-tRNA aminoacylation; methionine-tRNA ligase activity
TI4896S001223	41/B12		-0.86	SPBC713.10		conserved hypothetical; conserved protein
TI4896S004229	45/C01		-0.86	SPAC17A2.01	car1; sod1; SPAC1B1.05	MFS efflux transporter; repressed by thiamine; deletion mutant resistant to amiloride; similar to Sp SPCC576.17C and SPCC965.13
TI4896S003322	13/A03	Lethal	-0.86	SPAC3A12.03c		conserved hypothetical; zinc finger protein; zf-C3HC4 type (RING finger); ubiquitin ligase (E3)
TI4896S003155	29/H08		-0.85	SPAC821.09	eng1	glycosyl hydrolase family 81; endo-1,3-beta-glucanase; involved in septation; involved in cytokinesis; involved in cell separation; non-essential; GPI anchored protein; glycoprotein; regulated by Ace2p; similar to Sp eng2
TI4896S000930	45/F07		-0.85	SPBC1683.01		inorganic phosphate transporter
TI4896S003596	18/B09		-0.85	SPAC3C7.02c		conserved hypothetical; hypothetical protein; similar to Sp meu14 and SPCC736.02c
TI4896S004321	19/D12		-0.85	SPAC1F12.01c	SPAC1556.08c	involved in glucose derepression; 5'-AMP-activated (gamma subunit) (#needs check); CBS domain protein
TI4896S003366	25/B01	Lethal	-0.85	SPAC57A7.08	phz1; pzh1	serine/threonine protein phosphatase pp-z; involved in salt tolerance; involved in the regulation of the plasma membrane H+-ATPase; regulates Na+ ion influx independently of Trk1p
TI4896S002042	11/C07		-0.85	SPBC19C7.07c		tRNA-splicing endonuclease subunit
TI4896S000196	29/C06		-0.84	SPCP31B10.07	eft202	experimentally characterised; elongation factor 2; identical to Sp eft201 (paralog)
TI4896S001832	42/B04		-0.84	SPBC12D12.07c	trx2	putative thioredoxinputative thioredoxin; similar to Sc TRX1 and TRX2
TI4896S001593	42/D01		-0.84	SPBC1D7.01		prefoldin (subunit 1)
TI4896S001844	38/A03		-0.84	SPBC19G7.01c	msh2; SPBC24C6.12c	mismatch-binding protein; involved in DNA repair; involved in mismatch repair; MMR pathway; interacts physically with Msh1p; interacts physically with Msh6; involved in mating-type switching; involved in chromosome organization (meiotic)
TI4896S001059	23/G02		-0.84	SPBC428.08c	clr4	histone H3 methyltransferase; involved in chromatin silencing; involved in chromatin silencing at silent mating type cassettes (sensu Fungi) (required); involved in chromatin silencing at centromere; SET domain; chromodomain protein; methylates histone H3 LYS9 to create a binding site for Swi6p; non-essential; no apparent Sc ortholog
TI4896S000728	25/F05		-0.84	SPCC18.08		lysyl-tRNA synthetase; involved in lysyl-tRNA aminoacylation; lysine-tRNA ligase activity
TI4896S003571	14/B03	Lethal	-0.84	SPAC17H9.08		mitochondrial carrier; involved in mitochondrial transport; unknown specificity
TI4896S003942	22/E07		-0.84	SPAC3F10.17		conserved hypothetical; involved in stress response
TI4896S002201	13/A02		-0.84	SPBC776.07		glycoprotein; involved in respiration
TI4896S000778	18/E08		-0.84	SPCC576.10c	rpt3	19S proteasome regulatory subunit; AAA family ATPase
TI4896S003082	23/G06		-0.84	SPAC2G11.10c		molybdopterin synthase sulfurylase
TI4896S001419	31/E01		-0.83	SPBC27B12.14		hypothetical protein; sequence orphan
TI4896S004848	29/F06		-0.83	SPAC1006.04c		hypothetical protein; sequence orphan; predicted coiled-coil
TI4896S000762	26/H10		-0.83	SPCC1739.13	hsp70	heat shock protein 70 family; similar to Sp SPAC13G7.02 (paralog)
TI4896S001130	30/B02		-0.83	SPBC839.16		c-1-tetrahydrofolate synthase
TI4896S004061	17/G11		-0.83	SPAC688.09		mitochondrial carrier
TI4896S002834	07/H03		-0.83	SPAC24B11.05		pyrimidine 5'-nucleotidase
TI4896S000718	35/A11		-0.83	SPCC74.04		amino acid permease family; similar to Sp SPBC15C4.04C and SPAPB24D3.02C and SPAC1039.01 and SPAC11D3.08C and SPCC584.13 and SPAC9.10 and SPCC794.03
TI4896S000435	25/G10		-0.83	SPCC550.09		conserved hypothetical; hypothetical protein; dysferlin domain-domain of unknown function present in yeast peroxisomal proteins (SMART)
TI4896S000737	23/F04		-0.83	SPCC18.17c		hypothetical protein; sequence orphan
TI4896S003151	22/D08		-0.83	SPAC821.05		eIF3 p40 eIF/signalosome component; MOV34 domain; no apparent Sc ortholog
TI4896S004999	29/G11		-0.83	SPAC922.02c	SPAC1039.11c	alpha-glucosidase; glycosyl hydrolase family 3; GPI anchored protein 1; similar to Sp agl1 and SPAC30D11.01c
TI4896S004974	38/G11		-0.83	SPAC3G6.11		DEAD box helicase
TI4896S002537	20/D05		-0.83	SPBC32C12.03c		serine/threonine protein kinase; kin1-like; no apparent orthologs
TI4896S004607	15/D08		-0.83	SPAC27D7.06		electron transfer flavoprotein (alpha subunit)
TI4896S000814	31/B02		-0.83	SPCC830.01c	SPCC1620.14c	SNF2 family; helicase C-terminal domain; AT hook protein; bromodomain protein; similar to Sp SPAC1250.01 (paralog)
TI4896S000086	25/E12		-0.82	SPCC794.07		dihydrolipoamide S-acetyltransferase activity; involved in acetyl-CoA biosynthesis from pyruvate; localization pyruvate dehydrogenase complex (sensu Eukarya)
TI4896S000026	22/F01		-0.82	SPCC613.09		tRNA-splicing endonuclease subunit
TI4896S002196	40/E03		-0.82	SPBC776.02c	bws1; dis2; sds1	serine/threonine protein phosphatase pp1-1; involved in sister chromatid separation (implicated) (mitosis); required for chromosome disjoining
TI4896S003515	50/E10		-0.82	SPAPB1A10.08		hypothetical protein; sequence orphan
TI4896S001963	38/D06		-0.82	SPBC6B1.06c	ubp14	ubiquitin C-terminal hydrolase activity; UBA domain; ubiquitin-binding protein (implicated); involved in protein deubiquitination; zinc finger protein; zf-UBP type
TI4896S000234	46/E03		-0.82	SPCC5E4.02c	ccr4; SPCC31H12.08c	similar to yeast glucose-repressible alcohol; CCR4-Not complex
TI4896S003639	48/C01		-0.82	SPAC23C11.15	pst2	transcriptional regulator; sin3 family corepressor; similar to Sp pst1 (paralog); essential; involved in retroelement propagation (required); involved in transcriptional regulation; involved in chromatin silencing; involved in chromatin assembly/disassembly; acetyltransferase complex; involved in histone deacetylation
TI4896S001565	40/E07		-0.82	SPBC19C2.05	ran1; pat1	serine/threonine protein kinase; involved in conjugation (regulation) (negative); involved in meiosis (regulation) (negative); involved in protein amino acid phosphorylation (of Mei2p)
TI4896S004245	18/B06		-0.82	SPAC17G6.04c	cpp1	protein farnesyltransferase (beta subunit); involved in protein prenylation; non-essential; mutant is hypersensitive to canavanine
TI4896S002902	28/H10		-0.82	SPAC630.14c	tup1; tup12	eneral transcriptional repressor; transcriptional repressor functioning redundantly with Tup11p; WD repeat protein; histone binding
TI4896S004171	49/F01		-0.81	SPAP32A8.01c	apc5; SPAC959.09c	anaphase-promoting complex (APC); involved in cyclin degradation (required); involved in metaphase-anaphase transition
TI4896S002854	34/D08		-0.81	SPAC1F5.11c		phosphatidylinositol kinase; TPR repeat protein
TI4896S003473	27/G12		-0.81	SPAC17A5.12		DNAJ domain protein; involved in protein deubiquitination (implicated); ubiquitin-binding protein
TI4896S002641	40/H04		-0.81	SPBC16G5.12c	top3	DNA topoisomerase III; involved in nuclear division (required); involved in DNA replication; involved in chromosome segregation; possibly functions downstream of Rqh1p
TI4896S000021	28/A06		-0.81	SPCC613.04c	rng3	UCS-domain protein; involved in cytokinesis; involved in contractile ring assembly (required); involved in assembly of myosin II containing proteins at the division site; armadillo repeat protein (inferred from conntext)
TI4896S003504	49/B11		-0.81	SPAC1399.03	fur4	uracil permease; similar to Sp SPAC29B12.14C
TI4896S004893	05/D05		-0.81	SPAP691.03	SPAPJ691.03	conserved protein
TI4896S002506	39/F04		-0.81	SPBC1604.14c	shk1; pak1	serine-threonine protein kinase Pak1-Shk1; serine/threonine protein kinase; Ras1p-Scd1p-Scd2p-Cdc42p-Shk1p complex; p21-activated kinase; effector for Cdc42p; interacts physically with Cdc42p; interacts physically with Scd2p; required for Ras and Cdc42p-dependent signaling cascades; involved in Ras/Cdc42 signaling module; Cdc42p/Rac interactive binding (CRIB) motif; involved in actin cytoskeletal…
TI4896S004915	26/G07		-0.81	SPAC14C4.13	rad17	involved in DNA damage checkpoint; involved in DNA replication checkpoint; RFC related; involved in DNA repair; involved in double-strand break repair
TI4896S003368	47/C08		-0.81	SPAC57A7.06		ribonucleoprotein (RNP) complex; small subunit (SSU) processome component; involved in rRNA processing; predicted coiled-coil protein; predicted ATP/GTP binding (prosite)
TI4896S004383	47/C10		-0.81	SPAC2F3.10		GARP complex; involved in protein sorting in the late Golgi; involved in retrograde transport from the prevacuole; involved in docking at the trans-Golgi network; zf-C2H2 type; zinc finger protein (inferred from context); involved in actin cytoskeletal organization; similar to S. cerevisiae YDR027C
TI4896S002586	33/A09		-0.80	SPBC56F2.11	met6	homoserine o-acetyltransferase
TI4896S001243	36/F12		-0.80	SPBC646.11	cct6	chaperonin-containing T-complex; T-complex protein 1 (zeta subunit); chaperone; involved in protein folding; involved in actin folding; involved in tubulin folding
TI4896S000457	36/C06		-0.80	SPCC645.14c	sti1	TPR repeat protein; activator of Hsp70 and Hsp90 chaperones
TI4896S003794	26/E03		-0.80	SPAC23H3.11c		glucosidase activity; involved in beta-1,6 glucan biosynthesis; involved in cell wall organization and biogenesis
TI4896S000717	27/F02		-0.80	SPCC74.03c		serine/threonine protein kinase; involved in the regulation of carbohydrate metabolism; similar to Sp SPAC23H4.02
TI4896S003697	40/G05		-0.80	SPAC13G7.02c	hsp70	heat shock protein 70 family; similar to Sp SPCC1739.13 (paralog)
TI4896S002853	30/D11		-0.80	SPAC1F5.12	trk2; SPAC1639.02c	similar to Sp trk1; TrkH domain
TI4896S003412	46/D12		-0.80	SPAP27G11.14c		hypothetical protein; sequence orphan
TI4896S000151	11/C01		-0.80	SPCC306.11		sequence orphan; hypothetical protein
TI4896S000115	44/H11		-0.80	SPCC736.12c		hypothetical protein; sequence orphan; serine-rich protein
TI4896S001228	47/D08		-0.80	SPBC216.02		predicted coiled-coil protein; involved in nuclear migration (sensu Fungi); pleckstrin homology domain
TI4896S003819	50/E09		-0.80	SPAC4A8.14	prs1	ribose-phosphate pyrophosphokinase
TI4896S003784	30/C04		-0.80	SPAC19A8.01c	sec73; sec7c; SPAC23H3.01	Sec7 domain; cytohesin-like protein; similar to Sp sec71 and sec72 and sec74
TI4896S002480	30/C11		-0.80	SPBC21C3.20c		C2 domain; similar to Sp SPAC11E3.02C
TI4896S000333	47/C02		-0.80	SPCC16A11.12c	ubp1	ubiquitin C-terminal hydrolase activity
TI4896S004638	49/B07		-0.79	SPAC12B10.11	exg2	glycosyl hydrolase family 5; exo-1,3-beta-d-glucanohydrolase
TI4896S002269	48/A02		-0.79	SPBC17D1.07c		hypothetical protein calcium binding protein; calponin homology (CH) domain; IQ domain
TI4896S002443	44/D10		-0.79	SPBC13G1.13	SPBC31F10.01	transcription factor TFIIH
TI4896S001245	32/F09		-0.79	SPBC646.13	moc1; sds23; psp1	CBS domain protein; involved in destruction box mediated ubiquitinylation; phosphatase and 20S cyclosome/APC for the onset of anaphase
TI4896S003120	46/D03		-0.79	SPAC1687.10		hypothetical protein; sequence orphan; predicted coiled-coil
TI4896S004687	32/H11		-0.79	SPAC17D4.01	pex7; SPAC1834.12	peroxisomal targeting signal receptor; WD repeat protein
TI4896S004260	15/G10		-0.79	SPAC1142.02c	SPAC17G6.19c	conserved hypothetical; conserved protein; TPR repeat protein
TI4896S001226	49/E10		-0.79	SPBC216.01c	SPBC713.13c	eukaryotic conserved protein
TI4896S003043	48/B08		-0.78	SPAC22G7.02		karyopherin-beta; involved in nuclear transport
TI4896S001515	24/C09		-0.78	SPBC83.08		AAA family ATPase; chromatin remodeling complex; involved in chromatin remodeling; (old->putative tata binding protein-interacting)
TI4896S000236	31/B09		-0.78	SPCC5E4.04	cut1	separin; separase; involved in mitotic regulation and sister chromatid separation; promotes anaphase; loaded onto the metaphase spindle by Cut2p; peptidase family C50; shows proteolytic activity toward Rad21/Scc1
TI4896S003163	27/A07		-0.78	SPAC139.03		transcriptional regulator; zinc finger protein; similar to Sp SPAC3C7.04 (paralog)
TI4896S000933	29/A09		-0.78	SPBC1683.04		beta-glucosidase activity; glycosyl hydrolase family 3; no apparent Sc ortholog
TI4896S001183	15/E11		-0.78	SPBC577.11		sequence orphan; hypothetical protein
TI4896S000328	04/G07		-0.77	SPCC16A11.07		hypothetical protein UPF0083
TI4896S001656	33/B01		-0.77	SPBP16F5.07	apm1	adaptor complexes medium subunit family; component of the adaptor complexes which link clathrin to receptors in coated vesicles. Clathrin-associated protein complexes are believed to interact with the cytoplasmic tails of membrane proteins, leading to their selection and concentration; belongs to the adaptor complexes medium subunit family; contains 1 MHD (mu homology) domain; interacts with sad1
TI4896S003065	27/F05		-0.77	SPAC4G8.13c		transcriptional regulator; zinc finger protein
TI4896S003437	39/A06		-0.77	SPAC824.05	vps16	vacuolar protein sorting-associated protein involved in intracellular protein transport; involved in vacuole fusion
TI4896S002547	44/E03		-0.77	SPBC3B9.09	vps36	zinc finger protein; zf-RBZ; involved in intracellular protein transport
TI4896S003121	38/G06		-0.77	SPAC1687.11	pmt2	RNA methyltransferase; potential SAM-dependent enzyme; involved in rRNA processing
TI4896S004554	34/F01		-0.77	SPAC30.05	pof1; SPAC29E6.01	F-box protein; WD repeat protein; no apparent Sc ortholog
TI4896S004207	30/G12		-0.77	SPAC16E8.01		actin cortical patch component; involved actin cytoskeletal organization; src (SH3) homology domain
TI4896S000934	35/B06		-0.77	SPBC1683.05		thiamine transporter
TI4896S004977	28/F02		-0.77	SPAC29B12.02c		histone lysine methyltransferase; SET domain; WW domain (inferred from context)
TI4896S000793	43/F04		-0.77	SPCC126.08c		lectin predicted; no apparent S. cerevisiae ortholog; predicted N-terminal signal sequence; 1 predicted transmembrane helix; cargo receptor for glycoproteins
TI4896S000019	24/B08		-0.77	SPCC613.02		transporter; unknown specificity; similar to SpSPCC613.01 and SPCC330.07c and SPCC757.11c (paralogs); conserved in A. thaliana; no apparent Sc ortholog
TI4896S002183	33/G10		-0.77	SPBC4C3.02c	ade1; SPBC405.01	phosphoribosylamine-glycine ligase; phosphoribosylformylglycinamidine cyclo-ligase; involved in purine biosynthesis; bifunctional enzyme; de novo purine biosynthesis pathway (2nd step); de novo purine biosynthesis pathway (5th step)
TI4896S003245	30/H02		-0.77	SPAC4C5.05c	SPAC10F6.01c	sulfite reductase; involved in sulfate assimilation
TI4896S002003	34/A06		-0.77	SPBC336.04	cdc6; mis10; polD; pol3	DNA polymerase delta (catalytic subunit)
TI4896S004457	25/B04		-0.77	SPAC25B8.03		phosphatidylserine decarboxylase; involved in phosphatidylcholine biosynthesis; phosphatidylserine decarboxylase activity; similar to Sp SPBC16E9.18
TI4896S000079	22/A02		-0.77	SPCC794.01c		glucose-6-phosphate 1-dehydrogenase; involved in pentose-phosphate shunt, oxidative branch (1st step); involved in glutathione metabolism; involved in glucose 6-phosphate utilization; glucose-6-phosphate 1-dehydrogenase activity; similar to Sp SPAC3C7.13C and SPCC794.01C
TI4896S000996	18/F07		-0.76	SPBC1773.08c		mannosyltransferase complex subunit predicted; glycosyl transferase family; conserved fungal protein; similar to S. pombe SPBC32H8.08c; similar to S. cerevisiae YNL029C and YIL085C
TI4896S003192	46/B06		-0.76	SPAC1A6.07		hypothetical proline-rich protein; sequence orphan
TI4896S000962	29/C01		-0.76	SPBC660.10		involved in translation elongation (factor g)
TI4896S001308	30/E08		-0.76	SPBC1734.16c	pst3	paired amphipathic helix; histone deacetylase pathway
TI4896S002499	48/A09		-0.76	SPBC211.09	ptr3; uba1; SPBC1604.21c	ubiquitin-activating enzyme e1; involved in mRNA transport; poly(a)+ RNA transport protein
TI4896S004754	26/G03		-0.76	SPAC4F10.15c	wsp1	Wiskott-Aldrich homolog; involved in stress response; involved in cytokinesis; involved in actin cytoskeletal organization; involved in control of the actin cytoskeleton; actin cortical patch component; involved in actin cortical patch assembly; involved in actin cortical patch distribution; promoter homolD box; involved in endocytosis
TI4896S002617	26/D06		-0.75	SPBC14F5.11c		PX domain; phosphoinositide binding; involved in intracellular protein transport
TI4896S002502	23/D10		-0.75	SPBC1604.18c		SNF7 family; involved in intracellular protein transport; class E vps
TI4896S002165	22/G10		-0.75	SPBC1778.03c		NADH pyrophosphatase; Nudix family hydrolase; involved in NADH metabolism
TI4896S004283	20/H11		-0.75	SPAC15A10.02		putative transcription initiation factor TFIID subunit; putative SAGA complex, possibly involved in chromatin architecture
TI4896S004752	30/A04		-0.75	SPAC4F10.13c		GYF domain
TI4896S001695	14/H07		-0.75	SPBP23A10.06		mitochondrial carrier; involved in mitochondrial transport; unknown specificity; involved in manganese transport
TI4896S004535	44/E08		-0.75	SPAC23D3.03c		GTPase activating protein of Rab-like GTPase; TBC domain protein; no apparent Sc ortholog; similar to D. dictyostelium drainin
TI4896S003855	29/C10		-0.75	SPAC4F8.11		conserved hypothetical; WD repeat protein; similar to human peroxisomal targeting signal receptor; no apparent Sc ortholog
TI4896S004655	46/H10		-0.75	SPAC30C2.07		Sp specific families; glycoprotein serine-rich; possibly Sp specific
TI4896S003978	37/E06		-0.75	SPAC2E1P3.04		copper amine oxidase; no apparent Sc ortholog
TI4896S002064	46/E01		-0.75	SPBP4H10.11c		fatty acyl coA ligase; similar to Sp SPBC18H10.02 (paralog)
TI4896S002169	19/G08		-0.75	SPBC1778.07		conserved hypothetical; methyltransferase
TI4896S001470	49/E12		-0.74	SPBC691.03c	apl3; pi033; SPACTOKYO_453.02c	adaptin; AP-2 adaptor complex; involved in vesicule-mediated transport; Adaptins are components of the adaptor complexes which link clathrin to receptors in coated vesicles. Clathrin-associated protein complexes are believed to interact with the cytoplasmic tails of membrane proteins, leading to their selection and concentration; Alpha adaptin is a subunit of the plasma membrane adaptor
TI4896S004149	29/G08		-0.74	SPAC26A3.12c	dhp1	5'-3' exoribonuclease; involved in chromosome segregation; involved in RNA processing; essential; functionally complements S. cerevisiae RAT1; involved in meiotic recombination (implicated)
TI4896S000600	38/D12		-0.74	SPCC663.01c	SPCC777.16c	sap2 family; cell cycle dependent phosphatase-associated protein; involved in chromosome segregation
TI4896S003136	45/A04		-0.74	SPAC222.05c		era/thdf family GTP-binding protein
TI4896S004361	36/H08		-0.74	SPAC926.06c		leucine-rich repeat protein
TI4896S003475	30/F03		-0.74	SPAC17A5.14	exo2	exonuclease II; zf-C2H2 type; mutants are caffeine sensitive
TI4896S000659	05/D06		-0.74	SPCC1442.05c		hypothetical protein
TI4896S001612	03/D02	Lethal	-0.74	SPBC18H10.13	rps1402; rps14-2	40S ribosomal protein S14
TI4896S000245	34/F05		-0.74	SPCC16C4.02c		sequence orphan; hypothetical protein
TI4896S004096	39/C05		-0.74	SPAC6G10.05c		hypothetical protein TRAPP; involved in intracellular protein transport
TI4896S001206	19/C02		-0.74	SPBC36.04		cysteine synthase
TI4896S001948	34/B02		-0.74	SPBC25B2.02c	mam1; SPBC2G5.09c	ABC transporter family; MDR subfamily; mating factor; M-factor transporter
TI4896S002966	30/C08		-0.74	SPAC2F7.03c	pom1	DYRK family; dual specificity protein kinase; involved in cell polarity, cytokinesis, contractile ring positioning; similar to Sp SPAC16C9.07
TI4896S001277	29/E06		-0.74	SPBC146.14c	sec26; SPBC337.01c	adaptin; coatomer (beta subunit); the coatomer is a cytosolic protein complex that binds to dilysine motifs and reversibly associates with Golgi non- clathrin-coated vesicles, which further mediate biosynthetic protein transport from the ER, via the Golgi up to the trans Golgi network; Coatomer complex is required for budding from Golgi membranes, and is essential for the retrograde Golgi-to-ER t…
TI4896S002856	36/B11		-0.74	SPAC1F5.09c	shk2; pak2	serine/threonine protein kinase; pleckstrin homology domain; p21 activated kinase (PAK); effector for Cdc42p; non-essential; activator of Mkh1p-Pek1p-Spm1p cascade; Cdc42p/Rac interactive binding (CRIB) motif
TI4896S002171	19/H05		-0.74	SPBC1778.09		TBC domain protein; GTPase activating protein of Rab-like GTPase
TI4896S000763	29/G07		-0.73	SPCC1739.14	npp106; SPCC1739.14	nuclear pore complex; involved in nuclear import; involved in nuclear export; involved in nuclear export of the small ribosomal subunit; interacts physically with Rae1p (in mRNA export); similar to Sp SPCC1739.14 (1others)
TI4896S001363	27/D09		-0.73	SPBC725.08		zinc finger protein
TI4896S005024	45/F03		-0.73	SPAC186.09		pyruvate decarboxylase; similar to Sp SPAC1F8.07C; no apparent Sc ortholog
TI4896S004450	17/D12		-0.73	SPAC26H5.09c		oxidoreductase; GFO_IDH_MocA family; similar to Sp SPBC115.03 (paralog)
TI4896S001361	30/A06		-0.73	SPBC725.06c		serine/threonine protein kinase; similar to Sp cek1 (paralog)
TI4896S001533	26/C10		-0.73	SPBC27.03	meu25	meiotic expression upregulated; no apparent orthologs
TI4896S004234	39/C10		-0.73	SPAC17A2.06c		hyptohetical protein; WD repeat protein; clathrin domain; zinc finger protein; zf-C3HC4 type (RING finger); ubiquitin ligase (E3)
TI4896S004453	30/D10		-0.73	SPAC26H5.12		DNA-directed RNA polymerase
TI4896S003832	39/A09		-0.73	SPAC823.12		involved in intracellular protein transport; 7 fold repeat domain; zinc finger protein; zf-C3HC4 type (RING finger); ubiqitin ligase (E3)
TI4896S004859	35/G01		-0.73	SPAC29A4.20		RNA polymerase II holoenzyme component; histone acetyltransferase
TI4896S003789	28/C01		-0.73	SPAC23H3.06	apl6	AP-3 complex; adaptin; involved in vesicle-mediated transport
TI4896S000375	19/G06		-0.72	SPCC1795.03	gms1	UDP-galactose transporter; essential; involved in protein galactosylation (required); essential for the transport of UDP-galactose into the lumen of Golgi apparatus; belongs to the nucleotide-sugar transporter family. SLC35A subfamily; no apparent Sc ortholog
TI4896S002890	33/C01		-0.72	SPAC630.03	act2	ARP2/3 actin-organizing complex; involved in actin cortical patch assembly; actin-like protein; essential; involved in cell polarity; involved in endocytosis; actin cortical patch component; interacts genetically with Cdc3p; essential
TI4896S000116	15/C04		-0.72	SPCC736.13		conserved hypothetical; short chain dehydrogenase
TI4896S000171	43/H11		-0.72	SPCC364.06		involved in nucleosome assembly; similar to Sp SPBC2D10.11C (paralog)
TI4896S001124	37/H02		-0.72	SPBC839.10		hypothetical protein; RNA recognition motif; PWI domain
TI4896S003138	37/D05		-0.72	SPAC222.07c	hri2	serine/threonine protein kinase; eIF2 kinase; possibly regulates initiation of translation by phosphorylation of eIF2alpha; similar to Sp hri1 (paralog); no apparent Sc ortholog
TI4896S000384	30/G02		-0.72	SPCC895.09c		RNA helicase; similar to pre-mRNA splicing factors at the C terminus; UBA domain
TI4896S002234	33/E10		-0.72	SPBC25H2.12c	cct7	chaperonin-containing T-complex; T-complex protein 1 (eta subunit); involved in protein folding; involved in actin folding; involved in tubulin folding
TI4896S004371	34/H03		-0.72	SPAC323.07c		MatE family transporter; unknown specificity; similar to Sp SPCC4B3.13 and SPAC11D3.06
TI4896S001447	33/F05		-0.72	SPBC8D2.10c		zinc finger protein (inferred from context); zf-C2H2 type; arginine N-methyltransferase; no apparent Sc ortholog (has homologs)
TI4896S002874	24/A09		-0.72	SPAC18B11.01c	SPAC12G12.16c	XP-G family; involved in nucleotide-excision repair; involved in DNA repair; exonuclease; no apparent Sc ortholog; Sp specific duplication
TI4896S004677	31/A02		-0.72	SPAC1834.02	aro1	pentafunctional aromatic polypeptide; involved in aromatic amino acid biosynthesis; 3-dehydroquinate synthase; 3-phosphoshikimate 1-carboxyvinyltransferase; shikimate kinase
TI4896S000555	26/B04		-0.71	SPCC584.13		amino acid permease family; similar to Sp SPBC15C4.04C and SPAPB24D3.02C and SPCC74.04 and SPAC1039.01 and SPAC11D3.08C and SPAC9.10 and SPCC794.03
TI4896S001924	40/G09		-0.71	SPBC365.17	ccr1; SPBC29A10.01	NADPH-cytochrome p450 reductase; involved in ergosterol biosynthesis
TI4896S004113	31/B03		-0.71	SPAC6G9.10c	sen1	DNA2/NAM7 family; DEAD/DEAH box helicase; RNA helicase; tRNA-splicing endonuclease positive effector; involved in tRNA splicing & snRNA and snoRNA maturation; similar to Sp SPBC29A10.10c
TI4896S002980	28/E05		-0.71	SPAC13A11.01c	SPAC2F7.18c	GTPase activator; Rho specific; RhoGAP domain; DEP domain; FCH domain; predicted coiled-coil region; phosphorylated by Shk1p;
TI4896S000029	26/G02		-0.71	SPCC613.12c		WD repeat protein; similar to N.crassa B13I18.130; no apparent Sc ortholog
TI4896S004014	48/D10		-0.71	SPAC31G5.19		TAT-binding protein homolog; AAA family ATPase; bromodomain protein; similar to Sp SPBP22H7.05C (paralog)
TI4896S003994	49/D05		-0.71	SPAPB1A11.04c		transcriptional regulator; zinc finger protein; zf-fungal Zn(2)-Cys(6) binuclear cluster domain; similar to Sp SPAC1327.01C
TI4896S001461	40/H09		-0.71	SPBC17A3.04c	pi043; SPBC17A3.04c	methionine-tRNA ligase; involved in methionyl-tRNA aminoacylation; methionine-tRNA ligase activity
TI4896S001658	32/A08	Lethal	-0.70	SPBC16E9.01c	SPBP16F5.09c	hypothetical protein; sequence orphan
TI4896S002428	35/D04		-0.70	SPBC25D12.06		RNA helicase; similar to A. thaliana RH22; no apparent Sc ortholog
TI4896S004571	40/H05		-0.70	SPAC9E9.03	leu2	3-isopropylmalate dehydratase
TI4896S003430	37/G03		-0.70	SPAC343.16		homoaconitate hydratase; involved in lysine biosynthesis; functionally complements lys2-97 (pers. comm. Richard Hoffman)
TI4896S003277	28/C09		-0.70	SPAC1565.05		hypothetical protein; sequence orphan; predicted coiled-coil region
TI4896S000596	04/E04		-0.70	SPCC777.17c		hypothetical protein; ribosomal protein L9 N-terminal domain; no apparent Sc ortholog
TI4896S000207	25/E07		-0.70	SPCC1672.03c		guanine deaminase
TI4896S000998	35/E02		-0.70	SPBC1773.10c		asparagine-tRNA ligase; involved in asparaginyl-tRNA aminoacylation; asparagine-tRNA ligase activity
TI4896S003382	16/C01		-0.70	SPAC23H4.17c		serine/threonine protein kinase; cyclin C-dependent kinase; RNA polymerase II holoenzyme component
TI4896S001351	38/H07		-0.70	SPBC4.03c		SEC23/SEC24 family; SEC24 subfamily; COPII-coated vesicle component (putative); involved in intracellular protein transport
TI4896S000164	44/D07		-0.70	SPCC4G3.07c		zinc finger protein; transcriptional regulator; zf-PHD finger; similar to human retinoblastoma binding protein 2; similar toSp SPAC30D11.08c (paralog); no apparentSc ortholog; involved in transcriptional regulation
TI4896S003341	38/F02		-0.70	SPAC9.05		DEAD/DEAH box helicase; ATP-dependent; RNA helicase; similar to Sp SPAC20H4.04 (paralog)
TI4896S003471	07/G08		-0.70	SPAC17A5.10		conserved hypothetical protein
TI4896S004809	29/B03		-0.70	SPAC1952.11c	ure2	experimentally characterised; urease; no apparent Sc ortholog
TI4896S001508	29/F01		-0.70	SPBC83.01		actin cortical patch component; predicted coiled-coil region (600-700 AA); involved in endocytosis; EH domains; UBA domain; EF hand motifs; calcium binding protein; similar to Sp SPBC800.10C and SPAC25G10.09C; involved in protein deubiquitination (implicated); ubiquitin-binding protein
TI4896S000181	26/F09		-0.70	SPCC970.07c		sequence orphan; hypothetical protein
TI4896S002958	23/D05		-0.70	SPAC227.12		WD repeat protein; involved in mRNA splicing
TI4896S001997	39/H12		-0.70	SPBC4F6.18c	arf1	GTP-binding protein that functions as an allosteric activator of the cholera toxin catalytic subunit, an ADP- ribosyltransferase; Involved in protein trafficking; may modulate vesicle budding and uncoating within the Golgi apparatus; Belongs to the small GTPase superfamily; Arf family
TI4896S002876	24/G11		-0.70	SPAC12G12.14c		polyadenylation factor I subunit; essential (pers. comm. Chris Norbury); mRNA 3'-end processing; WD repeat protein; human ortholog fSAP57 has been isolated with functional spliceosomes; (old-> hypothetical Trp-Asp repeats containing protein)
TI4896S004063	30/C09		-0.70	SPAC688.11		actin cortical patch component; ENTH domain protein; actin-binding protein; involved in actin cytoskeletal organization, cell polarity, endocytosis
TI4896S001899	34/A11		-0.69	SPBC12C2.02c	ste16	WD repeat protein; involved in conjugation (required); involved in meiosis (required); regulates cell cycle progression under starvation through Rum1p
TI4896S001334	14/D06		-0.69	SPBC409.09c		conserved hypothetical; hypothetical protein; conserved in N. crassa; no apparent Sc ortholog
TI4896S001977	22/C03		-0.69	SPBC3E7.11c		DNAJ domain protein; similar to Sp SPAC4H3.01 (paralog)
TI4896S002256	46/E04		-0.69	SPBC17D11.02c		C3H4 type zinc finger protein; zf-C3HC4 type (RING finger); ubiquitin ligase (E3)
TI4896S003699	28/B08		-0.69	SPAC13G7.04c	mac1	membrane anchored protein; similar to Sp SPCC1739.10; involved in cell separation (required at high temperatures); possibly fungal specific
TI4896S000651	47/E02		-0.69	SPCC1450.12		sorting nexin; involved in intracellular protein transport; PX domain; phosphoinositide binding
TI4896S000585	34/H10		-0.69	SPCC777.02		involved in transcriptional regulation; zinc finger protein; zf-fungal Zn(2)-Cys(6) binuclear cluster domain; similar to Sp SPCC757.04 (paralog)
TI4896S004262	37/D08		-0.69	SPAC1142.04		involved in ribosome biogenesis and assembly; similar to Sp SPAC1B3.09c; predicted coiled-coil region
TI4896S001954	02/G05		-0.69	SPBC25B2.08		hypothetical protein; sequence orphan
TI4896S003029	30/H07		-0.69	SPAC22F3.04		AMP binding enzyme; similar to Sp SPAC56F8.02
TI4896S003908	48/D07		-0.69	SPAC1805.04		nuclear pore complex; involved in nuclear import; involved in nuclear export; involved in nuclear export of the small ribosomal subunit
TI4896S002467	16/H01		-0.69	SPBC21C3.07c		methyltransferase
TI4896S004577	24/E04		-0.68	SPAC9E9.09c		aldehyde dehydrogenase
TI4896S001369	24/D03		-0.68	SPBC725.14		acetylglutamate synthase; involved in ornithine biosynthesis; involved in arginine biosynthesis; amino-acid N-acetyltransferase activity
TI4896S000025	18/C01		-0.68	SPCC613.08		cdk inhibitor; similar to human tok1 a p21Cip1-binding protein that cooperatively enhances p21-dependent; inhibitory activity toward CDK2 kinase
TI4896S004558	06/A03		-0.68	SPAC30.09c	SPAC29E6.05c	peptide methionine sulfoxide reductase
TI4896S003373	36/E04		-0.68	SPAC167.05	SPAC57A7.01	Usp (universal stress protein) domain; no apparentSc ortholog
TI4896S002939	40/F12		-0.68	SPAC24H6.05	cdc25; sal2	M-phase inducer phosphatase; involved in G2/M phase transition; involved in cell cycle checkpoint; involved in DNA damage checkpoint; involved in DNA repair checkpoint; involved in the regulation of CDK activity; involved in control of mitosis
TI4896S004268	24/D06		-0.68	SPAC8C9.03	cgs1; rak1	cAMP-dependent protein kinase; negative regulator of meiosis; mutant (cgs1-1) displays cAPK activity unregulated by cyclic AMP (cAMP); (old-> cAMP-dependent protein kinase regulatory chain)
TI4896S001163	33/D02		-0.68	SPBC119.08	pmk1; spm1	serine/threonine protein kinase; MAP kinase (MAPK); regulates cell integrity; functions coordinately with the protein kinase C pathway; stress-activated; regulates morphogenesis; involved in cell wall biosynthesis
TI4896S002348	39/G04		-0.68	SPBC1105.12	hhf3; h4.3	histone H4 histone h4; similar to Sp hhf1
TI4896S000048	26/G04		-0.68	SPCC320.10	srp72	TPR repeat protein; protein signal sequence binding activity; involved in intracellular protein transport; involved in protein-ER targeting; involved in SRP-dependent cotranslational membrane targeting
TI4896S004670	33/C11		-0.68	SPAC144.13c	srw1; ste9	WD repeat protein; involved in conjugation (required); involved in regulation of anaphase promoting complex
TI4896S004253	47/B10		-0.68	SPAC17G6.12	pcu1	cullin family; SCF ubiquitin ligase complex; covalent modification of cullin-1 by the NEDD8 system plays an essential role in the function of SCF
TI4896S002092	38/A09		-0.68	SPBC2A9.04c		zinc finger protein; zf-C3HC4 type (RING finger); ubiquitin ligase (E3)
TI4896S001304	35/G08		-0.68	SPBC1734.12c		involved in cell wall biosynthesis
TI4896S001585	30/G09		-0.68	SPBC2F12.05c		involved in ergosterol biosynthesis; oxysterol binding protein; ankyrin repeat protein; pleckstrin homology domain; similar to Sp SPAC23H4.01
TI4896S004618	33/D05		-0.67	SPAC637.05c	vma2	V-type ATPase; ATP synthase (catalytic subunit B); localization vacuole
TI4896S003799	21/F01		-0.67	SPAC25H1.02		JOR domain; chromatin associated (predicted); no apparent Sc ortholog
TI4896S002147	24/E11		-0.67	SPBC30D10.17c		glucan synthase regulator; involved in beta-1,3 glucan biosynthesis; involved in cell wall organization and biogenesis; similar to N. crassa GS-1
TI4896S000370	47/H07		-0.67	SPCC1795.08c		Myb family; DNA binding protein; SANT subfamily; involved in chromatin remodeling
TI4896S004345	27/D12		-0.67	SPAC1071.01c	SPAC4H3.15c	involved in cleavage and polyadenylation
TI4896S003442	14/C10		-0.67	SPAC664.01c	swi6; SPAC824.10c	involved in mating-type switching (required); silent heterochromatin component; involved in chromosome segregation (required); involved in chromosome cohesion (required); involved in centromere function; involved in the association of Rad26p with centromeres (required); deletion mutant results in lagging chromosomes at mitosis at reduced temperature (frequent); chromodomain protein; binds centrom…
TI4896S002814	10/B09		-0.67	SPAC5H10.09c		3-methyl-2-oxobutanoate hydroxymethyltransferase; involved in pantothenate biosynthesis (first step); possibly coexpressed with SPAC5H10.08c which is also involved in pantothenate biosynthesis
TI4896S002204	37/E04		-0.67	SPBC776.10c		golgi transport complex (peripheral subunit); involved in intracellular protein transport; involved in secretory pathway; involved in ER to golgi transport
TI4896S002713	07/G04		-0.67	SPBC1289.09		sequence orphan; hypothetical protein
TI4896S000217	38/E05		-0.67	SPCC1183.01	sec15; SPCC1672.13	involved in secretory pathway; involved in exocytosis
TI4896S003279	48/E07		-0.67	SPAC1565.07c		TATA binding protein interacting protein; involved in transcriptional regulation; no apparent Sc ortholog
TI4896S004997	35/H09		-0.67	SPAC1039.09	isp5	involved in sexual differentiation; amino acid permease family; similar to Sp SPAP7G5.06 and SPAC869.11 and SPBC359.01 and SPBC359.01 and meu22 and SPBPB2B2.01
TI4896S001093	28/E12		-0.67	SPBC649.01c	klp6; SPBC1685.15c	kinesin-like protein; microtubule-destabilizing Kin I family; KIP3 subfamily; non essential; involved in microtubule disassembly; involved in meiosis (required); regulates the establishment of metaphase; regulates the onset of anaphase A; deletion mutant results in resistance to microtubule poison thiabendazole; deletion mutant results in abnormally long cytoplasmic microtubules; involved in chro…
TI4896S002194	25/F06		-0.67	SPBC609.05		FACT complex component; chromatin binding activity; involved in chromatin mediated transcriptional regulation; involved in DNA replication; involved in chromatin remodeling; chromatin assembly/disassembly; localization nucleus; involved in RNA elongation from Pol II promoter; alpha DNA polymerase primase complex; transcription elongation factor complex
TI4896S003849	38/G12		-0.66	SPAC7D4.03c		hypothetical protein; sequence orphan
TI4896S002536	33/A02		-0.66	SPBC32C12.02	ste11; aff1; steX	transcription factor; HMG box; NLS; involved in conjugation (regulation); involved in pheromone response
TI4896S000614	37/F04		-0.66	SPCC663.14c		hypothetical protein; similar to Sp SPAC1F7.03
TI4896S002300	29/B09		-0.66	SPBC4B4.03	rsc1	involved in chromatin remodeling; bromodomain protein; BAH domain
TI4896S004073	22/F12		-0.66	SPAC3G9.07c	phd1; hda1	transcriptional regulator; histone deacetylase; NAD-independent histone deacetylase activity; RPD3-like (class I); involved in transcriptional regulation; involved in chromatin silencing; involved in chromatin assembly/disassembly
TI4896S000938	35/C11		-0.66	SPBC1683.09c	frp1	ferric reductase transmembrane component; similar to Sp SPBC947.05C
TI4896S000426	28/E03		-0.66	SPCP25A2.03		vertebrate p84 (retinoblastoma binding) orthologue; involved in RNA processing; no apparent Sc ortholog
TI4896S001491	49/D01		-0.66	SPBC32H8.10	pi014; SPACTOKYO_453.22	Cdc2 kinase homologue; cyclin-dependent protein kinase; P-TEFb factor; serine/threonine protein kinase; involved in transcription from RNA polymerase II; complexed with Pch1p; interacts physically with Pch1p (Cdk domain); interacts physically with Pct1p; interacts physically with Spt5p; phosphorylates Spt5p (CTD)interacts physically with Rpb1p; phosphorylates Rpb1p
TI4896S000896	21/C12		-0.66	SPCC1827.06c		aspartate semialdehyde dehydrogenase; involved in threonine biosynthesis; involved in methionine metabolism; aspartate-semialdehyde dehydrogenase activity
TI4896S003815	49/D09		-0.66	SPAC4A8.10		hypothetical protein
TI4896S001371	40/G10		-0.66	SPBC725.16	sct1; res1	DSC1/MBF trancription factor complex; partner of Cdc10p transcription factor; ankyrin repeat protein; APSES domain; DNA-binding protein; regulator of mitotic cell cycle (positive); Mlu1-box binding factor (MBF); involved in transcriptional activation; involved in control of start (required); involved in control of mitosis; similar to Sp SPBC336.12c and SPAC22F3.09c
TI4896S004646	47/B03		-0.66	SPAC1093.03		polyphosphoinositide phosphatase activity
TI4896S003934	18/F10		-0.66	SPAC3F10.09		1-(5-phosphoribosyl)-5-[(5-phosphoribosylamino)methylideneamino]imidazole-4-carboxamide isomerase activity; involved in histidine biosynthesis (4th step)
TI4896S002462	23/G11		-0.66	SPBC21C3.02c		hypothetical protein
TI4896S003512	41/F12		-0.66	SPAPB1A10.05		sequence orphan; hypothetical protein
TI4896S003199	20/E09		-0.65	SPAC30D11.11		widely conserved protein; UPF0073; involved in the regulation of lipid and phosphate metabolism; PAC domain (SMART) which is implicated signal transduction and transcriptional regulation (inferred from context)
TI4896S001456	33/E07		-0.65	SPBC8D2.19	mde3	serine/threonine protein kinase; positive regulator of meiotic genes; meiosis specific transcription
TI4896S003085	25/F02		-0.65	SPAC2G11.13		membrane transporter; unknown specificity
TI4896S000985	30/D08		-0.65	SPBC800.10c		actin cortical patch component; involved in endocytosis; predicted coiled-coil region; EF hand motifs; similar to Sp SPBC83.01 and SPAC25G10.09C
TI4896S001735	21/H10		-0.65	SPBC18E5.10		putative respiratory chain NADH dehydrogenase complex subunit F; no apparent Sc ortholog
TI4896S001241	40/F02		-0.65	SPBC646.09c	int6; yin6	eIF3 p48 subunit eIF3/signalosome component; PCI domain; potential regulator for microtubule function; involved in chromosome segregation; chromosome segregation; interacts physically with Moe1p; froms a complex with Moe1p; interacts physically with Scd1p; interacts physically with Rpn5p; regulates the proteasome by affecting its localization/assembly; cooperates with Ras1p to mediate chromosome …
TI4896S001211	25/E08		-0.65	SPBC36.09	sap61	zinc finger protein; zf-C2H2 type; RNA-binding protein; complexed with Cdc5p
TI4896S003450	26/E05		-0.65	SPAC664.09		gamma-glutamyltranspeptidase
TI4896S003294	37/D09		-0.65	SPAC6F12.15c	cut9	anaphase-promoting complex (APC); cyclosome; involved in cyclin degradation (required); involved in mitotic metaphase/anaphase transition (required); TPR repeat protein; involved in metaphase-anaphase transition (required)
TI4896S004330	07/F02		-0.65	SPAC1F12.10	SPAC1F12.10c	heme binding protein; flavoprotein; cytochrome b5 family; similar to Sp SPCC330.03C
TI4896S001219	49/E03		-0.65	SPBC713.06		DNA ligase; similar to Sp CDC17
TI4896S000553	25/H03		-0.65	SPCC584.11c		conserved hypothetical; hypothetical protein; similar to Sp SPBC36B7.02; low similarity to NIFD/NIFK/NIFE/NIFN family
TI4896S004880	18/D03		-0.65	SPAC26F1.12c		eukaryotic conserved protein; similar to human HMG1 and HMG2 proteins
TI4896S001964	47/B06		-0.65	SPBC6B1.07	zer1; prp1	TPR repeat protein; involved in mRNA splicing (IGI); involved in G0 transition; involved in cell cycle progression (implicated); involved in poly(A)+ RNA nuclear export (implicated); does not functionally complement Sc PRP6
TI4896S002328	26/C01		-0.65	SPBC1718.02		zinc finger protein; zf-PHD finger; involved in transcriptional regulation; no apparent orthologs
TI4896S000265	49/H06		-0.65	SPCC18B5.01c	bfr1;hba2; SPCPJ732.04c	brefeldin A efflux transporter; ABC transporter family; PDR subfamily; similar to Sp SPAPB24D3.09c
TI4896S004733	30/F08		-0.65	SPAC20G4.02c	fus1	formin; involved in conjugation with cellular fusion, actin cytoskeletal organization; actin-binding protein; similar to Sp cdc12 and for3
TI4896S002424	46/A05		-0.64	SPBC25D12.02c		hypothetical protein; sequence orphan; serine-rich protein
TI4896S003465	25/G12		-0.64	SPAC17A5.04c		zinc metallopeptidase; disintegrin/ADAM protease; GPI anchored protein (pers. comm. Birgit Eisenhaber); glycoprotein; non-essential; no apparent Sc ortholog
TI4896S000239	48/D06		-0.64	SPCC5E4.06	rad18	involved in DNA repair; involved in DNA damage response (required); SMC6 complex
TI4896S001953	24/D10		-0.64	SPBC25B2.07c		sequence orphan; proline-serine rich protein; domain conserved in D. melanogaster MAP205 microtubule associated protein-check
TI4896S004099	20/A10		-0.64	SPAC6G10.08	idp1	isocitrate dehydrogenase (NADP+); involved in isocitrate metabolism; involved in glutamate metabolism; isocitrate dehydrogenase (NADP+) activity; involved in tricarboxylic acid cycle
TI4896S002192	38/F06		-0.64	SPBC609.03		WD repeat protein
TI4896S003805	19/B10		-0.64	SPAC25H1.08c		conserved hypothetical; WD repeat protein; similar to Sp pop3 (paralog)
TI4896S004933	52/B08		-0.64	SPAC11E3.11c		guanine nucleotide exchange factor; Sec7 domain; pleckstrin homology domain
TI4896S004515	12/B10		-0.64	SPAC25G10.01	SPAC2C4.18	RNA-binding protein; putative ribonucleoprotein; rrm RNA recognition motif; no apparent orthologs (conserved rrm only)
TI4896S000779	41/D07		-0.64	SPCC576.11	rpl15	60S ribosomal protein L15
TI4896S001028	25/E06		-0.64	SPBC106.06	cct4	chaperonin-containing T-complex; T-complex protein 1 (delta subunit); molecular chaperone; involved in protein folding; involved in actin folding; involved in tubulin folding; essential
TI4896S002458	37/H07		-0.64	SPBC31F10.16		ChAPs family protein; conserved fungal protein; involved in cell wall organization and biogenesis (maintenance)
TI4896S001632	16/E06		-0.64	SPBC28E12.04		sequence orphan; hypothetical protein
TI4896S002287	17/A06		-0.64	SPBC3B8.07c	dsd1	dihydrosphingosine delta 4 desaturase (pers. comm. Jonathan Napier); sphingolipid delta-4-desaturase (dihydroceramide desaturase) (pers. comm. Jonathan Napier); possible early signal for meiotic differentiation; fatty acid desaturase; no apparent Sc ortholog
TI4896S003644	20/H10		-0.63	SPAC13F5.03c		glycerol dehydrogenase; bacterial-like; no apparent Sc ortholog
TI4896S004797	35/E01		-0.63	SPAC1B3.16c		vitamin H transporter; MFS transporter; biotin transporter; plasma membrane; tandem duplication; similar to Sp SPAC1B3.16c; functionally complements Sc VHT1; allantoate permease family
TI4896S003448	23/C09		-0.63	SPAC664.07c	rad9	involved in DNA repair; involved in DNA damage checkpoint, DNA replication checkpoint; 3' to 5' exonuclease
TI4896S001310	30/B09		-0.63	SPBC1709.02c	SPBC1734.18c	valine-tRNA ligase; involved in valyl-tRNA aminoacylation
TI4896S000686	16/F11		-0.63	SPCC285.17		upstream activation factor complex; involved in the activation of RNA polymerase I; SWIB domain
TI4896S002880	20/B09		-0.63	SPAC12G12.10		hypothetical protein; WD repeat protein
TI4896S000224	42/F10		-0.63	SPCC1183.08c	rpl101; rpl1-1; rpl10a-2	60S ribosomal protein L10A
TI4896S003023	28/B03		-0.63	SPAC22F3.10c	gcs1	glutamate--cysteine ligase; involved in glutathione biosynthesis (1st step); involved in response to cadmium ion; glutamate-cysteine ligase activity
TI4896S003708	25/F08		-0.63	SPAC6C3.01c	SPAC13G7.13c	involved in sporulation; involved in spindle formation (meiotic); rrm RNA recognition motif (2); RNA-binding protein
TI4896S003928	27/A09		-0.63	SPAC3F10.03		glycine tRNA-ligase; functionally complements Sc GRS1
TI4896S000908	26/H03		-0.63	SPCP1E11.11		conserved hypothetical; RNA-binding protein; pumilio family
TI4896S002251	38/B08		-0.63	SPBC20F10.07		hypothetical protein
TI4896S001982	36/B01		-0.63	SPBC4F6.03c	leu3; SPBC3E7.16c	2-isopropylmalate synthase
TI4896S003950	43/H12		-0.63	SPAC8F11.08c		involved in lipase/lipid metabolism; conserved residues by multilple alignment
TI4896S003162	13/F07		-0.63	SPAC139.02c		MC oxaloacetate transporter (putative)
TI4896S002301	36/B10		-0.63	SPBC4B4.04		translation initiation factor eIF2A
TI4896S001137	21/A12		-0.63	SPBC947.13		hypothetical protein
TI4896S003339	34/C06		-0.63	SPAC9.03c	brr2	U5 snRNP-specific protein; DEAD/DEAH box helicase; RNA helicase; helicase C-terminal domain; AAA family ATPase; Sec63 domain; involved in mRNA splicing; complexed with Cdc5p
TI4896S004794	29/D06		-0.63	SPAC1B3.13		WD repeat protein; involved in the regulation of nucleolar silencing; involved in the regulation of the telophase exist (RENT) complex; ribonucleoprotein (RNP) complex; small subunit (SSU) processome component; involved in rRNA processing
TI4896S001076	24/B05		-0.63	SPBC902.05c	idh2; glu2	isocitrate dehydrogenase (NAD+); non-essential; involved in tricarboxylic acid cycle; involved in isocitrate metabolism; involved in glutamate biosynthesis; isocitrate dehydrogenase (NAD+) activity
TI4896S001479	50/F11		-0.63	SPBP22H7.07	prp5; cwf1; pi024; SPACTOKYO_453.10	WD repeat protein; prl1/prl2 phosphatases pleiotrophic regulator-like; involved in mRNA splicing (IGI); interacts physically with Cdc5p; nineteen complex (Ntc)(putative); essential
TI4896S000323	28/E02		-0.63	SPCC16A11.02	SPCC63.16	WD repeat protein; ribonucleoprotein (RNP) complex; processome component; involved in rRNA processing
TI4896S000569	21/G09		-0.63	SPCC1753.06c	SPCC162.12	hypothetical protein; serine-rich protein; sequence orphan
TI4896S000149	35/G03		-0.63	SPCC306.09c	cap1; cap	actin cortical patch component; adenylyl cyclase-associated protein
TI4896S004431	09/C06		-0.62	SPAC23A1.07		zinc finger protein; zf-C3HC4 type (RING finger); ubiquitin ligase (E3)
TI4896S000839	34/G06		-0.62	SPCC1919.14c		transcription factor TFIIIB complex; involved in transcription from Pol III promoter; Myb family; DNA binding protein
TI4896S002379	34/B04		-0.62	SPBC16D10.04c	dna2	DNA helicase; involved in DNA repair; involved in DNA replication; essential; involved in Okazaki fragment processing
TI4896S000428	18/F08		-0.62	SPCC550.02c	cwf5; ecm2	RNA-binding protein; involved in mRNA splicing; complexed with Cdc5p; 40S snRNP-containing complex; rrm RNA recognition motif
TI4896S002178	29/A07		-0.62	SPBC4C3.06		conserved hypothetical; hypothetical protein; FCH domain
TI4896S001199	36/F01		-0.62	SPBC530.12c	yhc1	N-terminal palmitoyl-protein thioesterase domain; C-terminal phoshphatidic acid phosphatase domain (PAP2); domain combination not observed in other organisms; related toSc YGR036C; no apparent orthologs
TI4896S003550	39/E02		-0.62	SPAC9G1.02	wak1; wis4; wik1	mitogen-activated protein kinase Wis4; MA serine/threonine protein kinase; mitogen-activated protein kinase; MAP kinase kinase kinase (MAPKKK); involved in the regulation of mitosis; Spc1 SAPK cascade
TI4896S000649	35/D02		-0.62	SPCC1450.10c		iron only hydrogenase large subunit; similar to human nuclear prelamin A recognition factor
TI4896S002558	29/B02		-0.62	SPBC215.01	SPBC3B9.20	TBC domain protein; EF hand motifs; calcium binding protein; GTPase activating protein of Rab-like GTPase
TI4896S003077	46/E08		-0.62	SPAC2G11.05c		hypothetical coiled-coil protein; BRO1-like domain; involved in signal transduction; similar to A. nidulans pala; MAP kinase pathway
TI4896S001313	33/E06		-0.62	SPBC1709.05	sks2; hsc1	heat shock protein 70 family; confers K-252a resistance
TI4896S001795	47/E11		-0.62	SPBC14C8.14c	pol5	DNA polymerase V
TI4896S003418	27/A06		-0.62	SPAC343.05	vma1	H(+)-ATPase; vacuolar ATP synthase (catalytic subunit A)
TI4896S002285	36/D04		-0.62	SPBC3B8.09		ribonucleoprotein (RNP) complex; small subunit (SSU) processome component; involved in rRNA processing; involved in establishment and/or maintenance of chromatin architecture; involved in telomere repression
TI4896S000476	37/G05		-0.62	SPCC1322.14c		polyphosphate synthetase; 3 predicted transmembrane helices; involved in vacuole fusion (non-autophagic)
TI4896S003506	49/C09		-0.62	SPAC1399.01c		purine permease; no apparent Sc ortholog
TI4896S001775	38/A02		-0.62	SPBC17G9.08c	csx2	ADP-ribosylation factor (ARF); GTPase activating protein; ArfGap domain; pleckstrin homology domain; similar to Sp SPAC26A3.10; no apparent Sc ortholog
TI4896S002671	39/F09		-0.62	SPBC543.03c		putative DNA helicase DNA helicase; Ku domain protein; involved in DNA repair; involved in double-strand break repair; involved in telomere maintenance (required); involved in double-strand break repair via nonhomologous end-joining; involved in control of replication timing in telomeric regions; interacts physically with pku70p; forms a heterodimer with pku70p; DNA-binding protein; telomere bind…
TI4896S002552	22/D06		-0.62	SPBC3B9.14c		mitochondrial ribosomal protein L3; RNAse3 domain; ds-RNA binding motif
TI4896S002008	35/B03		-0.62	SPBC336.09c	rrn7	RNA polymerase I transcription factor (subunit); interacts physically with Rrn11p
TI4896S004941	38/B06		-0.62	SPAP8A3.05		translation release factor
TI4896S001799	17/E07		-0.61	SPBC15C4.01c	oca3; SPBC14C8.18c	eukaryotic conserved protein; TPR repeat protein; overexpression results in cell cycle defects
TI4896S002456	31/A06		-0.61	SPBC31F10.14c		TPR repeat protein; histone transcriptional regulator
TI4896S001945	40/E02		-0.61	SPBC2G5.06c	cad1; hmt2	sulphide-quinone oxidoreductase; involved in sulphide metabolism; involved in heavy metal resistance; no apparent Sc ortholog
TI4896S001714	38/A04		-0.61	SPBC29A3.09c		non-transporter with ATP binding cassette; involved in amino acid starvation response; protein kinase activator
TI4896S003187	26/D01		-0.61	SPAC1A6.03c		lysophospholipase; similar to Sp SPAC1A6.04C and SPBC1348.10C SPAC977.09C and SPCC1450.09C and SPAC1786.02; tandem duplication; GPI anchored protein (pers. comm. Birgit Eisenhaber)
TI4896S004329	36/A11		-0.61	SPAC1F12.09		hypothetical protein; Sc YDR434W is null lethal
TI4896S004698	24/F02		-0.61	SPAPYUG7.01	tfa1; SPAC458.07	transcription initiation factor TFIIE (alpha subunit)
TI4896S004241	24/G12		-0.61	SPAC17A2.13c	rad25; cps6	DNA damage checkpoint protein Rad25
TI4896S002401	36/H09		-0.61	SPBP8B7.14c	dpb2	DNA polymerase epsilon (subunit b); essential; involved in DNA replication (initiation); assembly of the replicative complex; origin binding
TI4896S001874	33/D08		-0.61	SPBC1921.03c	mex67	involved in mRNA export; interacts physically with Rae1p
TI4896S000284	44/A05		-0.61	SPCC1020.09		similar to guanine nucleotide-binding protein; WD repeat protein; no apparent Sc ortholog; non-essential
TI4896S001477	49/G05		-0.61	SPBP22H7.05c	pi026; SPACTOKYO_453.08	possibly I TAT-binding protein homolog; AAA family ATPase; bromodomain protein; similar to Sp SPAC31G5.19 (paralog)
TI4896S003706	13/C08		-0.61	SPAC13G7.11		hypothetical protein; sequence orphan; confirmed introns (2)
TI4896S004707	06/A06		-0.61	SPAC1782.04		hypothetical protein; sequence orphan
TI4896S004004	35/E09		-0.61	SPAC31G5.10		Myb family; DNA-binding protein; enhanced transcript after nitrogen starvation; transcription factor for RNA polymerase II
TI4896S000567	16/C08		-0.61	SPCC1753.04		3'(2'),5'-bisphosphate nucleotidase; phosphomonoesterase; target of lithium; inositol monophosphatase family; deletion mutant results in sulfite auxotrophy
TI4896S001032	24/H10		-0.61	SPBC106.10	pka1; tpk; git6	cAMP-dependent protein kinase (catalytic subunit); serine/threonine protein kinase; involved in conjugation (regulation) (negative); involved in the regulation of meiosis (negative); involved in protein amino acid phosphorylation (of Mei3p); overexpression results in cell cycle defects; non-essential
TI4896S003311	28/F07		-0.61	SPAC20G8.01	cdc17; SPAC57A10.13c	DNA ligase; ATP-dependent; involved in DNA replication; functionally complemented by Sc CDC9; does not functionally complement Sc CDC9; induced by UV-irradiation; involved in telomere maintenance
TI4896S001938	51/E07		-0.61	SPBC29A10.15	orc1; orp1	origin recognition complex (subunit 1); involved in S phase checkpoint (required); AT hook protein; AAA family ATPase; BAH domain; Cdc18/Cdc6 family of S-phase regulators
TI4896S001921	22/F08		-0.61	SPBC365.14c		UDP glucose NAD dependant epimerase/dehydratase
TI4896S003214	44/D02		-0.61	SPAC56F8.06c		dolichyl-phosphate-glucose-glycolipid alpha-glucosyltransferase activity; involved in N-linked glycosylation
TI4896S001808	33/E09		-0.61	SPBC21H7.05	sfc6	RNA polymerase III transcription factor (TFIIIC subunit) (putative); WD repeat protein; AT hook (inferred)
TI4896S002660	40/D12		-0.60	SPBC16A3.09c	ufd1	ubiquitin fusion degradation protein (putative); Cdc48-Ufd1-Npl4 complex component (putative); involved in proteasomal processing; involved in the recognition of polyubiquitin-tagged proteins
TI4896S000054	29/A01		-0.60	SPCC320.04c		eukaryotic conserved protein; Rho GTPase; involved in apoptosis; ATP/GTP binding; EF hand motifs; calcium binding protein
TI4896S001314	45/F04		-0.60	SPBC1709.06		dihydrouridine synthase; involved in tRNA modification
TI4896S002746	50/E03		-0.60	SPBPB2B2.18		very hypothetical protein
TI4896S004909	26/H04		-0.60	SPAC14C4.07		transporter; unknown specificity
TI4896S001033	22/H09		-0.60	SPBC106.11c		phospholipase A2; 1-alkyl-2-acetylglycerophosphocholine esterase; involved in glycerolipid metabolism; involved in lipid catabolism; no apparent Sc ortholog
TI4896S000840	37/C09		-0.60	SPCC1919.15	SPCC790.01	zinc finger protein; zf-C3HC4 type (RING finger); ubiquitin ligase (E3); involved in ubiquitination; involved in histone H2B monoubiquitination; similar to Sp SPCC970.10C
TI4896S002984	34/H11		-0.60	SPAC13A11.04c	ubp8	ubiquitin C-terminal hydrolase activity; zinc finger protein; zf-UBP type
TI4896S004185	24/D01		-0.60	SPAC3A11.12c	rpt5; pam2; tbp1; SPAC3H5.01	19S proteasome regulatory subunit; AAA family ATPase; switch from mitotic to meiotic cell cycle is disturbed by strong activation of Ras-MAP kinase cascade in the fission yeast 26S proteasome-related mutants; (old-> probable 26S protease regulatory subunit 6A.)
TI4896S000030	47/D05		-0.60	SPCC613.13c	rhp16; rad16; SPCC330.01c	involved in DNA repair; involved in nucleotide-excision repair; zinc finger protein; zf-C3HC4 type (RING finger); ubiquitin ligase (E3); SNF2 familyj; DEAD/DEAH box helicase; helicase C-terminal domain
TI4896S000425	29/G03		-0.60	SPCP25A2.02c	rhp26	involved in nucleotide-excision repair; involved in DNA repair; involved in meiotic recombination; SNF2 family; DEAD/DEAH box helicase; helicase C-terminal domain; human Cockayne syndrome B homolog
TI4896S003640	27/F06		-0.60	SPAC23C11.16	plo1	Polo kinase Plo1; essential; serine/threonine protein kinase; involved in spindle formation, contractile ring assembly, contractile ring positioning, septation; functional homolog of Sc CDC5; interacts physically with Cut12p; stress response pathway signalling (SRP), mediated phosphorylation of Ser402 regulates the timing of commitment to mitosis; stress response pathway signalling (SRP), mediate…
TI4896S004254	22/F04		-0.60	SPAC17G6.13	slt1	involved in caffeine resisitance; no apparent orthologs
TI4896S001861	33/D11		-0.60	SPBC36B7.01	SPBC19G7.17	translocon; involved in protein-ER targeting; similar to Sp sec61 (paralog)
TI4896S004831	33/F09		-0.60	SPAC22E12.09c	krp1; krp	kexin; peptidase activity; serine protease; serine-type endopeptidase activity; peptidase family S8; specificity dibasic amino acids; calcium dependent; peptide pheromone maturation; mutant rescued by the overexpression of yps1; mutant rescued by the overexpression of pgp1
TI4896S001942	14/H09		-0.60	SPBC2G5.03		conserved hypothetical; hypothetical protein; UPF0021 family
TI4896S002207	40/F05		-0.60	SPBC776.12c	hsk1	serine/threonine protein kinase; Hsk1-Him1p/Dfp1p complex; involved in DNA replication (initiation) (required); activated by Dfp1p; required for genome integrity; involved in DNA replication (required); minichromosome maintenance protein kinase
TI4896S004695	28/F06		-0.60	SPAC458.05	vps34	phosphatidylinositol 3-kinase; involved in stress response (implicated); class D vps; essential; involved in cell growth (required); involved in vacuole organization and biogenesis; involved in sporulation; involved in conjugation; involved in prospore membrane formation
TI4896S000438	20/H04		-0.59	SPCC550.12		actin-like protein
TI4896S004437	19/B05		-0.59	SPAC23A1.14c		cystathionine gamma-synthase activity; involved in cysteine metabolism; involved in methionine biosynthesis from homoserine via O-succinyl-L-homoserine and cystathione; cystathionine gamma-synthase activity
TI4896S000624	30/B04		-0.59	SPCC417.08		translation elongation factor 3
TI4896S004306	26/C07		-0.59	SPAP7G5.02c		GMP synthase [glutamine-hydrolyzing]; involved in purine biosynthesis; involved in guanine biosynthesis
TI4896S003576	21/G06		-0.59	SPAC17H9.13c		glutamate 5-kinase; PUA domain
TI4896S004567	26/F01		-0.59	SPAC16.04		dihydrouridine synthase; involved in tRNA modification
TI4896S001091	29/C04		-0.59	SPBC1685.14c		conserved hypothetical; hypothetical protein; non-essential
TI4896S002525	30/H06		-0.59	SPBC26H8.04c		conserved hypothetical; DEP domain
TI4896S003675	35/C06		-0.59	SPAC13D6.04c		hypothetical protein; ankyrin repeat protein; BTB domain
TI4896S003897	17/H04		-0.59	SPAC6F6.11c		pyridoxal kinase
TI4896S001749	27/D03		-0.59	SPBC23G7.13c		urea transporter
TI4896S003389	45/A09		-0.59	SPAC23H4.10c	thi4	bifunctional enzyme; involved in thiamine biosynthesis; hydroxyethylthiazole kinase; thiamine-phosphate dipyrophosphorylase
TI4896S004947	23/A02		-0.59	SPAP8A3.11c		GTP1/OBG family; GTP-binding protein
TI4896S001307	33/D03		-0.59	SPBC1734.15	brd1	involved in transcriptional regulation; involved in chromatin remodeling; bromodomain protein; BHA domain
TI4896S002526	22/B06		-0.59	SPBC26H8.05c		serine/threonine protein phosphatase
TI4896S002518	27/H02		-0.59	SPBC1604.02c		conserved hypothetical; PPR domains
TI4896S003852	24/F06		-0.59	SPAC4F8.14c	hcs1; hcs	3-hydroxy-3-methylglutaryl coenzyme A synthase; hydroxymethylglutaryl-coa synthase; involved in mevalonate synthesis; IQ calmodulin binding motifs; involved in ergosterol biosynthesis; (old-> hydroxymethylglutaryl-CoA synthase (EC 4.1.3.5))
TI4896S003602	47/H10		-0.59	SPAC3C7.08c	elf1	AAA family ATPase; involved in mRNA export; non-essential; interacts genetically with rae1; interacts genetically with mex67; non-transporter with ATP binding cassette
TI4896S000854	29/A02		-0.59	SPCC965.02	SPCC1840.12	similar to oligopeptide transporter (OPT) family; similar to Sp isp4 and SPAC29B12.10C
TI4896S004603	28/B02		-0.59	SPAC27D7.02c		eukaryotic conserved protein; involved in intracellular protein transport; predicted coiled-coil protein; GRIP domain; possibly targetted to golgi
TI4896S004307	37/F02		-0.59	SPAP7G5.03		conserved fungal protein; transmembrane helices
TI4896S001748	32/G02		-0.58	SPBC23G7.12c	let1; rpt6	19S proteasome regulatory subunit; AAA family ATPase
TI4896S002185	15/D11		-0.58	SPBC405.03c		conserved hypothetical protein
TI4896S004139	24/G10		-0.58	SPAC26A3.02	myh1; myh	MutY homolog; involved in mismatch repair; interacts physically with Pcn1p; adenine DNA glycosylase; A/8-oxoG glycosylase; deletion mutant has mutator phenotype; oxidative DNA damage protection; no apparent Sc ortholog (old-> A/G-specific adenine DNA glycosylase)
TI4896S000656	39/A11		-0.58	SPCC1450.17	ste6; SPCC1442.01	guanine-nucleotide releasing factor, Ste6p guanine-nucleotide releasing factor; involved in conjugation; src (SH3) homology domain
TI4896S004480	47/G10		-0.58	SPAC694.06c	mrc1	involved in DNA replication checkpoint; involved in the activation of Cds1p during replication stress (required); involved in chromatin silencing; predicted coiled-coil; DEK-rich protein; similar to human Claspin
TI4896S002288	44/H05		-0.58	SPBC3B8.06		hypothetical protein
TI4896S002432	12/G11		-0.58	SPBC13G1.03c		involved in protein-peroxisome targeting
TI4896S004540	19/H07		-0.58	SPAC23D3.08		sequence orphan; hypothetical protein
TI4896S003671	14/C11		-0.58	SPAC18G6.15	mal3	EB1 domain; calponin homology domain; involved in microtubule cytoskeleton organization and biogenesis; involved in spindle formation; microtubule-associated protein; involved in cell shape and size control; interacts physically with Moe1p; involved in microtubule based movement; involved in microtubule loading and/or processivity (required); functionally complemented by human EB1
TI4896S003230	47/B01		-0.58	SPAC22A12.07c		dolichyl-phosphate-mannose-protein mannosyltransferase; MIR domains
TI4896S001768	48/D04		-0.58	SPBC17G9.01	prp16; SPBC1711.17	ATP-dependent RNA helicase; involved in mRNA splicing; involved in RNA silencing
TI4896S004750	33/A11		-0.58	SPAC4F10.11	spn1	septin; non-essential; involved in cytokinesis; involved in septation; involved in cell separation
TI4896S000167	15/H12		-0.58	SPCC4G3.04c	coq5	C-methyltransferase; involved in ubiquinone biosynthesis
TI4896S003850	45/B09		-0.58	SPAC7D4.02c		conserved hypothetical; hypothetical proteinsrc (SH3) homology domain; no apparent orthologs
TI4896S004473	33/B12		-0.58	SPAC683.01c	SPAC25B8.19c	conserved hypothetical; zinc finger protein; zf-C2H2 type; zinc finger protein; zf-C2H2 type; similar to Sp SPAC3H1.11
TI4896S001556	24/G08		-0.58	SPBC21B10.06c		hypothetical protein; sequence orphan
TI4896S002654	33/A08		-0.58	SPBC16A3.15c	nda2	tubulin alpha-1 chain
TI4896S003649	45/G07		-0.58	SPAC1783.01		oxidoreductase; similar to Sp SPAC12C2.03; no apparent Sc ortholog
TI4896S004863	26/F07		-0.58	SPAC29A4.16		serine/threonine protein kinase
TI4896S003959	47/D09		-0.58	SPACUNK4.12c		peptidase family M16; involved in pheromone response
TI4896S002986	35/E10		-0.58	SPAC3H8.01	SPAC13A11.06	pyruvate decarboxylase; similar to Sp SPAC3G9.11
TI4896S001399	39/B03		-0.58	SPBC3D6.12		Trp Asp repeat protein WD repeat protein; Sc DIP2 is dom34 interacting protein; ribonucleoprotein (RNP) complex; processome component; involved in rRNA processing
TI4896S000329	36/C11		-0.58	SPCC16A11.08		sorting nexin; PX domain; involved in intracellular protein transport; phosphoinositide binding
TI4896S000467	36/G11		-0.58	SPCC1322.05c		leukotriene A-4 hydrolase
TI4896S002844	46/A10		-0.58	SPAC806.02c		WD repeat protein; N terminal is similar to Par A family ATPase; C terminal is similar to Cia1 family WD repeat domains, this domain combination does not usually co-occur; gene structure confirmed; essential
TI4896S003109	46/F07		-0.58	SPAC22H12.05c		fasciclin domain protein (3); cell-adhesion molecule in higher eukaryotes
TI4896S000475	34/G10		-0.58	SPCC1322.13	ade6; min1	phosphoribosylaminoimidazole carboxylase; AIR carboxylase; involved in purine biosynthesis
TI4896S004796	26/D09		-0.58	SPAC1B3.15c		transporter; localization membrane; unknown specificity; allantoate permease family; tandem duplication; similar to Sp SPAC1B3.16c (paralog)
TI4896S004671	45/C05		-0.57	SPAC144.14	klp8	kinesin-like protein
TI4896S003955	29/E10		-0.57	SPACUNK4.16c		glycosyl transferase family 20; alpha,alpha-trehalose-phosphate synthase; involved in the de-phosphoryulation of trehalose-6-phosphate to trehalose and orthophosphate; similar to Sp SPAC22F8.05
TI4896S004704	48/G11		-0.57	SPAC1782.01	SPAPYUG7.07	conserved eukaryotic protein; HEAT repeat (inferred from context); involved in cell wall organization and biogenesis
TI4896S004103	25/F09		-0.57	SPAC6G10.12c		zinc finger protein; zf-C2H2 type (3); regulator of eng1; possibly involved in metallothionein expression; deletion mutant displays severe cell separation defects; involved in cytokinesis; involved in septation; involved in cell separation (regulation)
TI4896S001170	24/F11		-0.57	SPBC119.14	rti1	involved in DNA repair; involved in double-strand break repair; essential; involved in S phase completion (required); similar to Sp rad22
TI4896S002431	21/G05		-0.57	SPBC13G1.02		mannose-1-phosphate guanyltransferase
TI4896S004808	19/C01		-0.57	SPAC1952.10c		Sp specific families; hypothetical protein; similar to Sp SPAC23H3.04
TI4896S003909	33/B03		-0.57	SPAC1805.05	cki3	serine/threonine protein kinase; casein kinase; similar to Sp SPBC1347.06c and SPBP35G2.05c (paralogs)
TI4896S004530	21/A01		-0.57	SPAC27F1.07		dolichyl-diphospho-oligosaccharide-protein glycosyltransferase activity; oligosaccharyl transferase complex; involved in N-linked glycosylation; GPI anchored protein; glycoprotein
TI4896S001778	41/A07		-0.57	SPBC17G9.11c	pyr1	pyruvate carboxylase
TI4896S002334	49/B04		-0.57	SPBP7E8.01	SPBPB7E8.01	hypothetical protein; sequence orphan
TI4896S000283	27/A04		-0.57	SPCC1020.10	oca2	serine/threonine protein kinase; overexpression results in cell cycle defects
TI4896S000128	46/B07		-0.57	SPCC1682.03c		hypothetical ser-rich protein hypothetical protein; sequence orphan
TI4896S001817	27/B09		-0.57	SPBC16H5.08c		non-transporter with ATP binding cassette
TI4896S001254	33/A10		-0.57	SPBP35G2.05c	cki2	serine/threonine protein kinase; casein kinase; similar to Sp SPBC1347.06c and SPAC1805.05 (paralogs)
TI4896S001919	27/F09		-0.57	SPBC365.12c	ish1; isp1	involved in stress response; similar to Sp SPAC23C4.05c (C-terminal); non-essential; overexpression lethal
TI4896S000715	46/F05		-0.57	SPCC74.01	sly1	sec1 family; SNARE binding activity; SNARE docking complex (TRAPP?); involved in non-selective vesicle docking; syntaxin binding protein; involved in intracellular protein transport; involved in secretory pathway; involved in exocytosis; involved in non-selective vesicle docking; involved in ER to golgi transport; interacts physically with Sed5p
TI4896S003224	35/B10		-0.57	SPAC22A12.01c	SPAC56F8.17c	damaged DNA binding activity; involved in DNA repair and double-strand break repair
TI4896S003892	30/E03		-0.57	SPAC6F6.06c		involved in cell polarity
TI4896S001031	48/G04		-0.57	SPBC106.09	cut4; apc1	Cut4 anaphase-promoting complex (APC); involved in cyclin degradation (required); involved in metaphase-anaphase transition (required); putative target for the spindle checkpoint pathway; essential
TI4896S000419	44/B02		-0.57	SPCC4B3.05c		uroporphyrinogen decarboxylase
TI4896S001200	21/C08		-0.57	SPBC530.13		cyclin homolog
TI4896S001944	27/F10		-0.56	SPBC2G5.05		transketolase; involved in pentose -phosphate shunt, non-oxidative branch
TI4896S002920	48/C09		-0.56	SPAC31A2.16		RhoGEF; guanine nucleotide exchange factor; no apparent Sc ortholog
TI4896S002778	49/C03		-0.56	SPAC977.16c	dak2	dihydroxyacetone kinase; induced by glycerol (WB); repressed by glucose (WB)
TI4896S000520	21/A10		-0.56	SPCC622.12c		NADP-specific glutamate dehydrogenase; involved in glutamate biosynthesis, using glutamate dehydrogenase (NAD(P)+); involved in nitrogen metabolism; glutamate dehydrogenase (NADP+) activity
TI4896S001873	20/D02		-0.56	SPBC1921.02	rad60	involved in DNA repair; involved in double-strand break repair (required); predicted coiled-coil region; no apparent orthologs
TI4896S004958	25/F11		-0.56	SPAC4D7.08c	ade4; min13; aza1	amidophosphoribosyltransferase; glutamine phosphoribosylpyrophosphate amidotransferase; involved in purine biosynthesis; purine nucleotide de-novo biosynthetic pathway; involved in glutamate metabolism; expression not repressed by ade4
TI4896S000040	30/E11		-0.56	SPCC330.11		BTB domain; ankyrin repeat protein; regulator of condensation
TI4896S000163	50/A06		-0.56	SPCC4G3.08	psk1	serine/threonine protein kinase; similar to Sp SPAC22E12.14C (paralog)
TI4896S003153	24/B03		-0.56	SPAC821.07c		zf-fungal Zn(2)-Cys(6) binuclear cluster domain; transcriptional regulator
TI4896S002649	40/F11		-0.56	SPBC1652.02	aap1; SPBC16A3.20c	APC amino acid transporter
TI4896S002408	25/D05		-0.56	SPBP8B7.21	ubp3	ubiquitin C-terminal hydrolase activity
TI4896S001637	12/E02		-0.56	SPBC3H7.13		FHA domain (phosphopeptide binding)
TI4896S003617	49/E05		-0.56	SPAC20H4.04		DEAD/DEAH box helicase; ATP-dependent; RNA helicase; similar to Sp SPAC9.05
TI4896S002572	13/G12		-0.56	SPBC215.15	sec13	WD repeat protein; COPII-coated vesicle component; DMSO-sensitive conditional mutant is defective for septation; involved in septation (inferred); nuclear pore complex; involved in intracellular protein transport
TI4896S001996	28/F09		-0.56	SPBC4F6.17c		AAA family ATPase; chaperone activit; involved in protein folding; involved in response to stress
TI4896S004118	24/C02		-0.56	SPAC6G9.15c		agglutinin-like; sequence orphan
TI4896S000959	50/A10		-0.56	SPBC660.07	ntp1	O-glycosyl hydrolase; neutral trehalase; alpha,alpha-trehalose glucohydrolase; glycosyl hydrolase family 37; involved in trehalose metabolism; involved in stress response (required); involved in sporulation (implicated); complexed with Tps1p; calcium binding protein
TI4896S002985	25/A01		-0.56	SPAC13A11.05		cytosol aminopeptidase; peptidase family M17; no apparent Sc ortholog
TI4896S002032	34/H06		-0.56	SPBC32F12.10		phosphoglucomutase; involved in glucose 1-phosphate utilization; involved in glucose 6-phosphate utilization; phosphoglucomutase activity
TI4896S000285	27/F11		-0.56	SPCC1020.08		putative respiratory chain, has low similarity to NADPH; cytochrome p450 reductase; flavodoxin
TI4896S002824	29/H09		-0.56	SPAC13G6.06c		glycine dehydrogenase (decarboxylating); involved in glycine metabolism; glycine dehydrogenase (decarboxylating) activity
TI4896S000685	48/F04		-0.56	SPCC285.16c	msh6	MutS family; involved in DNA repair; involved in mismatch repair; interacts physically with Msh2p
TI4896S001962	38/A01		-0.56	SPBC6B1.05c		involved in autophagy; involved in vacuole targeting; involved in peroxisome degradation
TI4896S002247	20/G05		-0.56	SPBC20F10.03		conserved eukaryotic protein; developmental regulator-like; involved in signal transduction; no apparent Sc ortholog; non-essential
TI4896S004072	36/B07		-0.56	SPAC3G9.06		phenylalanine-tRNA ligase (alpha subunit); involved in phenylalanyl-tRNA aminoacylation; phenylalanine-tRNA ligase activity
TI4896S002153	40/G07		-0.56	SPBC30D10.11	gpi1	N-acetylglucosaminyl transferase component; involved in GPI anchor biosynthesis (1st step); involved in cytokinesis; involved in cell separation; essential
TI4896S002741	50/H02		-0.56	SPBPB2B2.13		galactokinase
TI4896S003783	39/C06		-0.56	SPAC19A8.02		hypothetical protein involved in transcriptional activation; pleckstrin homology domain; possibly protein kinase interacting
TI4896S004430	26/G08		-0.55	SPAC23A1.06c	cmk2	MAPK-activated protein kinase; serine/threonine protein kinase; calmodulin dependent; involved in oxidative stress response (required); overexpression suppresses DNA replication checkpoint defects; involved in G2/M phase progression; non-essential; similar to Sp SPCC1322.08 (paralog); interacts physically with Sty1p; phosphorylated by Sty1p; overexpression blocks the cell cycle at G2 phase
TI4896S003312	46/G07		-0.55	SPAC20G8.02		phospholipase; DDHD domain (putative metal binding site)
TI4896S001965	45/A01		-0.55	SPBC6B1.08c		histone acetyltransferase complex; 2 OG-Fe(II) oxygenase superfamily
TI4896S000626	24/G09		-0.55	SPCC417.10		membrane transporter; unknown specificity; allantoate permease family; similar to Sp SPCC757.13 and SPBC1773.15
TI4896S003684	47/A09		-0.55	SPAC4G9.09c	arg11	N-acetyl-gamma-glutamyl-phosphate reductase; acetylglutamate kinase; involved in arginine biosynthesis; involved in ornithine biosynthesis; N-acetyl-gamma-glutamyl-phosphate reductase activity; acetylglutamate kinase activity
TI4896S001674	32/G07		-0.55	SPBC16E9.17c	rem1	B-type cyclin; essential for meiotic progression; overexpression results in cut phenotype
TI4896S001287	14/A08	Lethal	-0.55	SPBC337.11		zinc binding dehydrogenase; no apparent Sc ortholog
TI4896S004035	29/A03		-0.55	SPAC16A10.01		conserved hypothetical; hypothetical protein; Sc YJL108C is regulated by pheromone
TI4896S001242	24/B06		-0.55	SPBC646.10c		ribonucleoprotein (RNP) complex; processome component; involved in rRNA processing; snoRNA binding domain; U3 snoRNP component; C/D box snoRNP component; involved in 2'-O-methylation of rRNAs
TI4896S000060	39/D02		-0.55	SPCC1235.05c		helicase with SNF2 domain DEAD/DEAH box helicase; SNF2 family; helicase C-terminal domain; involved in UV protection; paralog?
TI4896S002493	30/G11		-0.55	SPBC211.03c		guanyl-nucleotide exchange factor activity; Sec7 domain; similar to S. cerevisiae YJR031C and YEL022W
TI4896S003914	25/E04		-0.55	SPAC1805.10		sequence orphan; hypothetical protein
TI4896S004700	28/A03		-0.55	SPAPYUG7.03c	mid2	pleckstrin homology domain; involved in cytokinesis; involved in septation; involved in cytokinesis, formation of actomyosin apparatus; involved in cell separation; GTP-binding protein (ISS)
TI4896S001652	50/A01		-0.55	SPBP16F5.03c		putative phosphatidylinositol kinase; similarity phosphatidylinositol kinase; SAGA complex; FAT domain; FATC domain; similar to Sp SPAC1F5.11c (paralog)
TI4896S001686	21/B08		-0.55	SPBC1A4.07c		WD repeat protein; U3 snoRNP complex associated; ribonucleoprotein (RNP) complex; processome component; involved in rRNA processing
TI4896S001118	09/D05		-0.55	SPBC839.04	rpl803; rpk5-b; rpkD4; rpl8-3	60S ribosomal protein L8
TI4896S000053	27/D07		-0.55	SPCC320.05		sulfate transporter
TI4896S003318	47/F12		-0.55	SPAC20G8.08c		SNF2 family; helicase C-terminal domain; DEAD/DEAH box helicase; similar to Sp SPCC1235.05C and SPAC25A8.01C
TI4896S001376	17/F07		-0.55	SPBC651.03c		TBC domain protein; GTPase activating protein of Rab-like GTPase; non-essential (pers. comm. Kathy Gould); involved in secretory pathway (IGI) (pers. comm. Kathy Gould); no apparent Sc ortholog
TI4896S002252	28/A09		-0.55	SPBC20F10.08c		hypothetical protein
TI4896S000537	35/F03		-0.55	SPCC11E10.05c		nucleoside diphosphatase; similar to S. cerevisiae YER005W; 1 predicted transmembrane helix; predicted N-terminal signal sequence; non-essential; double mutant gda1delta/ynd1delta lethal
TI4896S003041	27/D04		-0.55	SPAC22G7.01c	SPAPJ696.03c	aminopeptidase; peptidase family M24
TI4896S004284	39/G01		-0.55	SPAC15A10.03c	rhp54; rad54	DNA repair protein Rhp54 DEAD/DEAH box helicase; SNF2 family; helicase C-terminal domain; DNA dependent ATPase activity; DNA supercoiling activity; involved in DNA repair; deletion mutant sensitive to UV; deletion mutant sensitive to ionizing radiation); deletion mutant results in elongated cells (frequent); deletion mutant results in aberrant nuclei (occasional); deletion mutant results in a hig…
TI4896S003444	21/G04		-0.55	SPAC664.03		involved in the regulation of transcription elongation; RNA polymerase II associated Paf1 complex
TI4896S001400	37/G11		-0.55	SPBC3D6.13c		glycoprotein; thioredoxin related glycoprotein; thioredoxin domain; similar to Sp SPAC959.05C and SPCC1840.08C (paralogs)
TI4896S001528	33/G09		-0.55	SPBC29B5.02c	isp4	involved in sexual differentiation; OPT oligopeptide transporter family
TI4896S003325	46/G06		-0.55	SPAC3A12.06c		putative membrane transport protein; CaCA sodium/calcium exchanger
TI4896S000386	26/D11		-0.54	SPCC825.02		similar to human alpha glucosidase II beta subunit; putative protein kinase C substrate; EF hand (inferred from context); putative LDL receptor
TI4896S003072	47/C03		-0.54	SPAC16C9.06c		involved in mRNA catabolism, nonsense-mediated; regulator of nonsense transcript stability; involved in mRNA decapping (regulation); RNA dependent ATP helicase; DNA2/NAM7 family
TI4896S003489	24/H06		-0.54	SPAC1002.09c	dld1; dldh	dihydrolipoamide dehydrogenase (pyruvate dehydrogenase complex e3 component) (oxoglutarate dehydrogenase complex e3 component); involved in glycine catabolism; involved in isoleucine catabolism; involved in leucine catabolism; involved in serine biosynthesis; involved in valine catabolism; involved in acetyl-CoA biosynthesis from pyruvate; involved in G1/S transition of mitotic cell cycle; involv…
TI4896S003474	43/E03		-0.54	SPAC17A5.13		GTP cyclohydrolase
TI4896S000466	24/F10		-0.54	SPCC1322.04		UTP-glucose-1-phosphate uridylyltransferase activity; involved in protein amino acid glycosylation; similar to Sp SPCC794.10
TI4896S004206	12/C11		-0.54	SPAC328.10c	rps502; rps5-2	experimentally characterised; 40S ribosomal protein (S5)
TI4896S002053	49/H05		-0.54	SPBP19A11.06	lid2; SPBP4H10.01	Lid family protein; DNA-binding protein; zinc finger protein; zf-PHD finger; zf-C5HC2 type; jmjC domain; Arid/BRIGHT domain; similar domain organization to human retinoblastoma binding protein 2; involved in transcriptional regulation (implicated); interacts physically with SET1 complex; involved in regulation of chromatin remodeling (implicated); similar to Sp SPAC343.11c (paralog)
TI4896S004930	52/B04		-0.54	SPAC11E3.08c	cor1	no apparent orthologs; involved in cell polarity
TI4896S005011	29/B12		-0.54	SPAC869.05c		sulfate transporter; similar to Sp SPBC3H7.02 (paralog)
TI4896S000103	29/A04		-0.54	SPCC553.02		glutamine-dependent NAD(+) synthetase; conserved eukaryotic protein; involved in nicotinamide adenine dinucleotide biosynthesis
TI4896S004025	38/C07		-0.54	SPAC24C9.06c		aconitate hydratase; involved in citrate metabolism; involved in glutamate metabolism; involved in propionate metabolism; involved in tricarboxylic acid cycle; aconitate hydratase activity
TI4896S001581	17/E06		-0.54	SPBC2F12.10		mitochondrial ribosomal protein; phosphatidylethanolamine-binding family; involved in peptidase inhibition
TI4896S001120	47/H02		-0.54	SPBC839.06	cta3	Ca2(+)-ATPase; P-type ATPase
TI4896S004599	33/F10		-0.54	SPAC17C9.01c	nuc2; SPAC1851.01c	anaphase-promoting complex (APC); involved in G1 arrest after nitrogen starvation (required); involved in cyclin degradation; involved in metaphase-anaphase transition; involved in cytokinesis (regulation); involved in septation (regulation) (negative)
TI4896S002873	18/G09		-0.54	SPAC18B11.02c		DRAP deaminase activity; pseudouridylate synthase activity; involved in riboflavin biosynthesis
TI4896S002258	38/B12		-0.54	SPBC17D11.04c		zinc finger protein; zf-PHD finger; transcriptional regulator; involved in transcriptional regulation
TI4896S002804	36/B03		-0.54	SPAC11D3.17		involved in transcriptional regulation; zinc finger protein; zf-C2H2 type; no apparent orthologs
TI4896S004568	20/E11		-0.54	SPAC16.05c		zinc finger protein; zf-C2H2 type (2)
TI4896S002933	29/F09		-0.54	SPAC24H6.11c		putative SulP sulfate transporter; STAS domain; cyclic nucleotide-binding domain
TI4896S002569	30/A03		-0.54	SPBC215.12	cwf10; spef2; snu114	involved in mRNA splicing; similar to human U5 snRNP GTPase-U5 snRNP-specific ribosomal translocase EF-2
TI4896S003918	21/A11		-0.54	SPAC1805.14		hypothetical protein; sequence orphan
TI4896S004691	33/F04		-0.54	SPAC458.01	SPAC17D4.04	methyltransferase; possibly methylates cytidine and tRNAs
TI4896S000440	39/D01		-0.54	SPCC550.14		hypothetical KH domain RNA-binding protein RNA-binding protein; KH domain; involved in control of mitotic chromosome transmission
TI4896S002403	40/H08		-0.54	SPBP8B7.16c	dbp2	DEAD/DEAH box helicase; involved in RNA processing; p68 family helicase; overexpression results in cell cycle defects; large 3' intron like Sc DBP2
TI4896S004544	35/B05		-0.54	SPAC23D3.12		inorganic phosphate transporter; similar to Sp SPBC8E4.01c (paralog)
TI4896S000170	21/F10		-0.54	SPCC4G3.01	SPCC364.07	D-3 phosphoglycerate dehydrogenase; involved in serine biosynthesis; phosphoglycerate dehydrogenase activity
TI4896S002478	40/F07		-0.54	SPBC21C3.18	spo4	serine/threonine protein kinase; involved in sporulation (required); involved in spindle formation (meiotic); involved in ascospore formation (required); essential
TI4896S000166	35/F02		-0.54	SPCC4G3.05c	mus81	endodeoxyribonuclease RUS activity; Holliday junction resolvase; involved in DNA repair, nucleotide-excision repair, and nucleotide-excision repair, DNA damage recognition; interacts physically with Cds1p; XP-F family?; involved in meiotic recombination (required) (late step) and the processing of stalled and collapsed replication forks
TI4896S002410	46/C07		-0.54	SPBP8B7.23		zinc finger protein; zf-C3HC4 type (RING finger); ubiquitin ligase (E3)
TI4896S003337	25/H07		-0.53	SPAC9.01	zwf1; SPAC3A12.18	glucose-6-phosphate 1-dehydrogenase; involved in pentose-phosphate shunt, oxidative branch (1st step); involved in glutathione metabolism; involved in glucose 6-phosphate utilization; glucose-6-phosphate 1-dehydrogenase activity; similar to Sp SPAC3C7.13C and SPCC794.01C
TI4896S000209	34/E02		-0.53	SPCC1672.05c		tyrosine-tRNA ligase; involved intyrosyl-tRNA aminoacylation; tyrosine-tRNA ligase activity
TI4896S002041	37/F01		-0.53	SPBC19C7.06		proline-tRNA ligase; involved in prolyl-tRNA aminoacylation; proline-tRNA ligase activity
TI4896S002054	28/F11		-0.53	SPBP4H10.02c	SPBC1346.03; SPBP19A11.07c	hypothetical protein; no apparent Sc ortholog; similar to Sp SPAP27G11.12 (paralog)
TI4896S003152	20/D09		-0.53	SPAC821.06	spn2	septin; involved in cytokinesis; GTP-binding protein
TI4896S000664	14/B12		-0.53	SPCC1442.10c	rpb3	DNA-directed RNA polymerase II (subunit 3); involved in transcription from Pol II promoter; DNA-directed RNA polymerase activity (function of complex); DNA-binding activity (function of complex); interacts physically with Rpb2p; interacts physically with Rpb11p; interacts physically with Rpb10p
TI4896S000601	09/H12		-0.53	SPCC663.02	wtf14; wtf15	wtf element
TI4896S004918	47/A08		-0.53	SPAPJ760.02c	app1	actin-binding protein; actin cortical patch component; involved in endocytosis; cofilin/tropomyosin N-terminal domain; src (SH3) homology domain; divergent repeat containing consensus PVVPE[VA]PSVPQPP[AV][AV] (10)
TI4896S000979	32/H06		-0.53	SPBC800.05c	atb2; alp2; tub1; ban5	tubulin (alpha-2 chain); involved in microtubule cytoskeleton organization and biogenesis (maintenance); non-essential
TI4896S004966	18/G08		-0.53	SPAC3G6.03c		Maf-like protein; involved in cytokinesis; involved in septum formation (regulation) (negative); involved in septation
TI4896S002905	23/C02		-0.53	SPAC31A2.01	csn71; csn7b; csn7; csn7-2; SPAC1751.03	COP9/signalosome complex (subunit 7b); PCI domain; no apparent Sc ortholog
TI4896S001068	26/E06		-0.53	SPBC428.17c		hypothetical serine-rich protein; sequence orphan; non-essential
TI4896S002400	10/G03		-0.53	SPBP8B7.13		hypothetical protein; sequence orphan
TI4896S000137	21/C10		-0.53	SPCC1682.12c	ubp16	ubiquitin C-terminal hydrolase activity
TI4896S000692	48/C11		-0.53	SPCC1223.06	tea1	tip elongation aberrant microtubule-associated protein; involved in cell polarity; involved in cellular elongation; kelch repeat protein; target of Shk1p; phosphorylated by Shk1p; involved in cytokinesis; involved in microtubule based movement; involved in cell-end anchoring (required); similar to Sp tea3
TI4896S001083	23/H08		-0.53	SPBC1685.06	cid11	cid1-related; nucleotidyltransferase; DNA polymerase kappa; caffeine induced death protein; similar to Sp SPAC821.04c and cid1 (paralogs); no apparent Sc ortholog; deletion mutant sensitive to caffeine; deletion mutant sensitive to HU
TI4896S000414	27/C04		-0.53	SPCC4B3.10c	ipk1	inositol 1,3,4,5,6-pentakisphosphate (IP5) kinase
TI4896S001188	25/A10		-0.53	SPBC530.01		TBC domain protein; GTPase activating protein of Rab-like GTPase
TI4896S002779	49/C06		-0.53	SPAC977.17		putative transmembrane channel protein; MIP water channel
TI4896S001685	44/B06		-0.53	SPBC1A4.06c		conserved eukaryotic protein; similar to proline transport helper protein
TI4896S004527	23/E01		-0.53	SPAC27F1.05c		aminotransferase; no apparent Sc ortholog
TI4896S002422	37/A08		-0.53	SPBC19F5.04		aspartate kinase; involved in threonine biosynthesis; involved in methionine metabolism; aspartate kinase activity
TI4896S000690	19/F12		-0.53	SPCC1223.04c		SET domain; histone lysine methyltransferase
TI4896S000697	17/E08		-0.53	SPCC1223.11	ptc2	serine/threonine protein phosphatase; involved in regulation of osmolarity; protein phosphatase 2C family involved in mRNA splicing (implicated); similar to Sp ptc3 (paralog)
TI4896S002515	33/C10		-0.53	SPBC1604.05	pgi1	glucose-6-phosphate isomerase; involved in gluconeogenesis; involved in glycolysis; involved in pentose-phosphate shunt; glucose-6-phosphate isomerase activity
TI4896S000949	25/D12		-0.53	SPBC1198.07c		glycosylhydrolase; involved in cellular elongation; tandem duplication
TI4896S001989	25/H02		-0.52	SPBC4F6.10	vps901; vps9a	guanyl-nucleotide exchange factor activity; involved in intracellular protein transport; CUE domain protein (inferred from context); involved in endocytosis; involved in protein-vacuolar targeting
TI4896S001487	50/F04		-0.52	SPBC32H8.06	pi018; SPACTOKYO_453.18	TPR repeat protein
TI4896S001002	40/E04		-0.52	SPBC1773.14	arg7	argininosuccinate lyase; similar to Sp SPBC1539.03C (paralog)
TI4896S000592	45/B10		-0.52	SPCC777.09c	arg1	acetylornithine aminotransferase; involved in ornithine biosynthesis; involved in arginine biosynthesis via ornithine; involved in glutamate catabolism; acetylornithine aminotransferase activity; functionally complements arg1-230
TI4896S001145	35/C12		-0.52	SPBC947.05c		ferric reductase transmembrane component; similar to Sp frp1 (paralog)
TI4896S003423	26/G12		-0.52	SPAC343.10	met11; mthfr2	methylenetetrahydrofolate reductase; involved in methionine metabolism
TI4896S000458	27/E09		-0.52	SPCC23B6.01c		oxysterol binding protein; involved in ergosterol biosynthesis; similar to Sp SPBC646.08c and SPBC354.07c and SPBC1271.12
TI4896S003527	49/F07		-0.52	SPAC110.01	SPAC140.05	putative 5'-AMP-activated protein kinase; serine/threonine protein kinase
TI4896S004524	05/E09		-0.52	SPAC27F1.02c	cdc8; fus4	tropomyosin; actin-binding protein; F-actin contractile ring component; essential; involved in contractile ring assembly (required); involved in cytokinesis (required); involved in actin assembly and function; involved in conjugation; involved conjugation with cellular fusion (required)
TI4896S001821	25/C03		-0.52	SPBC16H5.05c	cyp7; cwf27	cyclophilin; peptidyl-prolyl cis-trans isomerase; complexed with Cdc5p; involved in mRNA splicing; no apparent Sc ortholog
TI4896S003839	38/B05		-0.52	SPAC7D4.12c		hypothetical protein; Sc YJL108C is regulated by pheromone; similar to Sp SPAC7D4.12c
TI4896S004992	24/G02		-0.52	SPAC1039.04		membrane transporter; unknown specificity; similar to Sp SPAC11D3.18C and SPAC1683.12 and SPAC1002.16C
TI4896S000943	20/D04		-0.52	SPBC1198.01		glutathione-dependent formaldehyde dehydrogenase; no apparent Sc ortholog; conserved in microbes
TI4896S004051	50/D05		-0.52	SPAC589.09		involved in phosphatidylinositol metablolism; CAL TRIO domain
TI4896S003717	52/B07		-0.52	SPAC17G8.01c	SPAC6C3.10c	tRNA ligase
TI4896S001975	27/C05		-0.52	SPBC3E7.09		conserved hypothetical protein
TI4896S003154	23/F01		-0.52	SPAC821.08c	slp1	WD repeat protein; Cdc20/Fizzy family; spindle assembly checkpoint component; interacts physically with Mad2p; effector of the Mad2-dependent spindle checkpoint; involved in DNA; damage recovery (required); APC activator; interacts genetically with p34cdc2; synthetically lethal with cdc25; synthetically lethal with cdr1; synthetically lethal with cdr2
TI4896S004522	37/G10		-0.52	SPAC25G10.08		eukaryotic translation initiation factor 3 (beta subunit); rrm RNA recognition motif; RNA-binding protein; involved in ribosome dissociation
TI4896S002625	28/G04		-0.52	SPBC342.02		glutaminyl-tRNA synthetase; involved in glutaminyl-tRNA aminoacylation; glutamine-tRNA ligase activity
TI4896S002711	32/D03		-0.52	SPBC1289.07c	rpc40; rpa42	DNA-directed RNA polymerases (I and III subunit)
TI4896S004292	34/C02		-0.52	SPAC15A10.11	ubr11	ubiquitin ligase (E3); N-end-recognizing protein; zinc finger protein; zf-C3HC4 type (RING finger); zf-UBR1 type; similar to Sp ubr1
TI4896S003588	37/A10		-0.52	SPAC607.06c		zinc metallopeptidase
TI4896S001870	49/A11		-0.52	SPBP18G5.02		cardiolipin biosynthesis pathway (1st step); involved in phosphatidylglycerol biosynthesis; involved in glycerol-3-phosphate catabolism; CDP-diacylglycerol-glycerol-3-phosphate 3-phosphatidyltransferase activity
TI4896S004815	27/A02		-0.52	SPAC890.01c	SPAC1952.17c	GTPase activating protein of Rab-like GTPase; possible Sp specific; closest to Sp SPBC530.01
TI4896S004220	34/E05		-0.52	SPAC16E8.13		conserved hypothetical; zinc finger protein; zf-C3HC4 type (RING finger); ubiquitin ligase (E3); zf-UBP type; human breast cancer-associated protein BRAP2 protein human
TI4896S001280	22/G08		-0.52	SPBC337.04		serine/threonine protein kinase
TI4896S004839	45/B05		-0.52	SPAC22E12.17c		GCS1/GLO3/SPS18 family; zinc finger protein; ArfGap domain; GTP-ase activating protein; involved in retrograde transport between Golgi and ER
TI4896S002230	27/F01		-0.51	SPBC25H2.16c		VHS domain; GAT domain; involved in intracellular protein transport; adaptin C-terminal domain; similar to S. pombe SPAC1F3.05
TI4896S002022	33/C05		-0.51	SPBC685.09	orp2; orc2	origin recognition complex
TI4896S004333	26/H11		-0.51	SPAC4H3.03c		conserved hypothetical; conserved protein (mainly bacterial); no apparent Sc ortholog
TI4896S000654	45/B01		-0.51	SPCC1450.15		phosphoethanolamine N-methyltransferase activity; involved in GPI anchor biosynthesis; similar to human PIG-F
TI4896S004736	35/D12		-0.51	SPAC20G4.05c		hypothetical protein; UPF0061 family
TI4896S002298	20/F11		-0.51	SPBC4B4.01c		pantothenate kinase; fumble domain; implicated in membrane synthesis
TI4896S004395	26/A07		-0.51	SPAC27E2.01		alpha-amylase; no apparent Sc ortholog
TI4896S004111	21/G02		-0.51	SPAC6G9.08	ubp6	ubiquitin family protein; ubiquitin C-terminal hydrolase activity
TI4896S003168	46/C04		-0.51	SPAC23C4.02	crn1	yeast coronin CRN1 homolog; WD repeat protein; coronin family; involved in actin cytoskeletal organization; actin-binding protein; actin cortical patch component
TI4896S003773	46/G04		-0.51	SPAC19A8.12		hypothetical PSU1-like protein; pyrophosphatase; involved in deadenylation-dependent decapping; Nudix family hydrolase
TI4896S004202	30/E06		-0.51	SPAC328.06	ubp2	ubiquitin C-terminal hydrolase activity
TI4896S001619	16/H08		-0.51	SPBC18H10.20c		conserved hypothetical protein
TI4896S001469	49/D03		-0.51	SPBC691.02c	pi034; SPACTOKYO_453.01	Rad50p interacting protein; similar to human RINT-1 (a Rad50 interacting protein which participates in radiation induced checkpoint control); no apparent Sc ortholog
TI4896S004664	13/C11		-0.51	SPAC144.07c		conserved eukaryotic protein; ATP-binding protein
TI4896S001607	44/C04		-0.51	SPBC18H10.08c	ubp4	ubiquitin C-terminal hydrolase activity
TI4896S001489	49/B08		-0.51	SPBC32H8.08c	pi016; SPACTOKYO_453.20	mannosyltransferase complex subunit predicted; glycosyl transferase family 15; conserved fungal protein; similar to S. cerevisiae YNL029C and YIL085C; similar to S. pombe SPBC1773.08C
TI4896S003836	19/G02		-0.51	SPAC823.16c		conserved hypothetical; WD repeat protein
TI4896S002060	36/A08		-0.51	SPBP4H10.07		zinc finger protein; zf-C3HC4 type (RING finger); ubiquitin ligase (E3); similar to Sp SPCC4G3.12C (paralog); no apparentSc ortholog
TI4896S004789	25/E09		-0.51	SPAC1B3.09c		involved in ribosome biogenesis and assembly; involved in ribosome nucleus export; similar to Sp SPAC1142.04; predicted coiled-coil region
TI4896S001322	19/C09		-0.51	SPBC1709.14		peptide N-glycanase; involved in deglycosylation; involved in proteasome-dependent pathway
TI4896S003786	22/H04		-0.51	SPAC23H3.03c		similar to nitrogen permease regulator; human ortholog is a candidate tumour suppressor; involved in cysplatin resistance
TI4896S004878	35/F12		-0.51	SPAC29A4.01c	SPAC26F1.14c	flavoprotein; similar to human mitochondrial apoptosis-inducing factor; flavoprotein inducing chromatin condensation and DNA fragmentation
TI4896S001459	08/F12	Lethal	-0.51	SPBC17A3.02		hypothetical protein
TI4896S001716	12/C01		-0.50	SPBC29A3.11c		conserved hypothetical; hypothetical protein; similar to Sp SPCC1682.13
TI4896S000150	51/D12		-0.50	SPCC306.10	wtf8; wtf3-pseudo	wtf element Wtf8
TI4896S000178	37/D01		-0.50	SPCC970.10c		zinc finger protein; zf-C3HC4 type (RING finger); E3 ubiquitin ligase; similar to Sp SPCC1919.15; involved in ubiquitination; involved in histone H2B monoubiquitination
TI4896S001507	47/F05		-0.50	SPBC1215.02c		N-acetyltransferase complex (non catalytic subunit); interacts physically with SPCC16C4.12; actin-binding protein; involved in mitochondrial inheritance; involved in mitochondrial biogenesis; involved in actin cytoskeletal organization; involved in excluding cofilin from cytoplasmic actin cables; TPR repeat protein (inferred from context); involved in cell polarity
TI4896S001207	40/G04		-0.50	SPBC36.05c	clr6	transcriptional regulator; cryptic loci regulator; histone deacetylase activityj; NAD-independent histone deacetylase activity; RPD3-like (class I); involved in transcriptional regulation; involved in chromatin silencing; involved in chromatin assembly/disassembly; essential
TI4896S000750	36/A10		-0.50	SPCC1739.01	SPCC1906.05	zinc finger protein; zf-CCCH type; similar to Sp scp3 (paralog)
TI4896S004294	46/F11		-0.50	SPAC15A10.13		serine/threonine protein kinase; POLO family protein kinase
TI4896S004228	26/H02		-0.50	SPAC1B1.04c		polyA specific ribonuclease subunit
TI4896S001723	14/H08		-0.50	SPBC29A3.18	cyt1	cytochrome c1; heme protein; respiratory complex III
TI4896S001009	20/F12		-0.50	SPBC1271.14		amino-acid N-acetyltransferase; glutamate N-acetyltransferase; involved in ornithine biosynthesis; involved in arginine biosynthesis; amino acid N-acetyltransferase activity; glutamate N-acetyltransferase activity; non-essential
TI4896S002626	21/C05		-0.50	SPBC342.03		GAS family; glucanosyltransferase; GPI anchored protein (pers. comm. Birgit Eisenhaber); glycoprotein; similar to Sp SPAC11E3.13C (paralog)
TI4896S001066	19/F01		-0.50	SPBC428.15		conserved hypothetical; GTP-binding protein; OBG family
TI4896S000791	20/F05		-0.50	SPCC126.06	twf1	twinfilin; actin cortical patch component; actin-binding protein; ADF family; cofilin/tropomyosin-type; putative actin monomer sequestering protein involved in regulation of the cortical actin cytoskeleton; possibly prevents actin filament assembly; involved in actin cortical patch distribution (pers. comm. David R. Kovar and Thomas D. Pollard); non-essential (pers. comm. David R. Kovar and Thoma…
TI4896S000279	27/A03		-0.50	SPCC14G10.04		hypothetical proline-rich protein
TI4896S000078	25/B08		-0.50	SPCC1529.01	SPCC794.14	MFS multidrug efflux transporter
TI4896S003931	26/B09		-0.50	SPAC3F10.06c		initiator tRNA phosphoribosyl transferase
TI4896S000433	25/G01		-0.50	SPCC550.07		acetamidase
TI4896S001814	33/F07		-0.50	SPBC16H5.11c	skb1	protein methyltransferase; interacts physically with Shk1p; interacts physically with Orb6p; involved in the regulation of cell morphogenesis; involved in the regulation of mitosis (negative); involved in osmotic stress
TI4896S002122	39/F12		-0.50	SPBC15D4.03	slm9	WD repeat protein; involved in mitotic control WD repeat protein; involved in mitotic control; pleiotrophic signal transducer for cell growth; similar to Sp SPBC15D4.03
TI4896S003740	35/D11		-0.50	SPAC22H10.10	sto1; alp21	LRR domain; involved in microtubule assembly (required); tubulin-specific chaperone and formation of alpha-beta-tubulin heterodimer; essential
TI4896S004314	40/B08		-0.50	SPAC1556.03	azr1	serine/threonine phosphatase family 2C (SMART); overexpression confers resistance to 5-azacytidine (nucleoside analogue)
TI4896S004883	30/A05		-0.50	SPAC26F1.09		GTPase activating protein predicted; target Rab-like GTPase predicted; TBC domain protein; similar to S. pombe SPCC1620.12
TI4896S000519	26/D08		-0.50	SPCC622.11		conserved hypothetical; hypothetical protein; conserved in C. elegans, D. melanogaster CG8135 and A. thaliana; no apparent Sc ortholog
TI4896S002488	40/G06		-0.50	SPBC23E6.08	sat1	involved in starvation-mediated G1 phase arrest; no apparent orthologs
TI4896S000077	35/A08		-0.50	SPCC548.07c	ght1	hexose transporter; similar to Sp GHT3, GHT2, GHT4, GHT5, GHT6, SPCC548.06C and SPBC1348.14C
TI4896S003590	35/H05		-0.50	SPAC607.08c		eukaryotic conserved protein
TI4896S001949	26/H09		-0.50	SPBC25B2.03		zinc finger protein; zf-C2H2 type
TI4896S004261	46/F03		-0.50	SPAC1142.03c	swi2; SPAC17G6.20c	involved in mating-type determination (required); no apparent orthologs
TI4896S001659	27/E03		-0.50	SPBC16E9.02c		CUE domain protein; involved in binding ubiquitin-conjugating enzymes (UBCs)
TI4896S003441	22/C07		-0.49	SPAC824.09c		GTPase activating protein; ArfGap domain
TI4896S000274	19/G10		-0.49	SPCC18B5.10c		conserved hypothetical; WD repeat protein; no apparent Sc ortholog
TI4896S002865	27/G06		-0.49	SPAC18B11.10	tup11	transcriptional repressor; histone binding; glucose repression regulatory protein; WD repeat protein
TI4896S004969	25/F04		-0.49	SPAC3G6.06c	rad2; fen1	FEN-1 endonuclease; involved in Okazaki fragment processing; involved in DNA replication; involved in DNA repair; Uve1p dependent repair; XP-G family; deletion mutant hypersensitive to MMS; involved in telomere maintenance
TI4896S001604	36/B06		-0.49	SPBC18H10.05		WD repeat protein; similar to Sp SPAC3H5.08C
TI4896S002734	49/C08		-0.49	SPBPB2B2.06c		putative 5' nucleotidase family protein; calcineurin-like phosphodiesterase; similar to Sp SPAC1039.02 and SPAC17G6.03
TI4896S004352	03/E03		-0.49	SPAC1071.08	rpp203; rpp2-3; rla6; ysprla6	ubiquinol cytochrome c reductase complex subunit (cytochrome bc1 complex); respiratory complex III
TI4896S000743	14/H10		-0.49	SPCC4F11.03c		sequence orphan; hypothetical protein
TI4896S004519	17/B01		-0.49	SPAC25G10.05c	his1	ATP phosphoribosyltransferase; histidine biosynthesis pathway (1st step)
TI4896S002398	24/A07		-0.49	SPBP8B7.11		RNA-binding protein; NTF2 domain; involved in nuclear cytoplasmic transport; rrm RNA recognition motif; Ras GTPase activating protein
TI4896S003707	21/C01		-0.49	SPAC13G7.12c		choline kinase
TI4896S005002	24/E10		-0.49	SPAC922.05c		similar to A. thaliana T10F20.2; no apparent Sc ortholog
TI4896S001449	32/G10		-0.49	SPBC8D2.12c	pi053	conserved protein; involved in mitochondrial protein synthesis
TI4896S004564	18/F05		-0.49	SPAC16.01	rho2	Rho family; small GTPase; involved in cellular morphogenesis; involved in septation; non-essential; overexpression results in loss of cell polarity and is lethal
TI4896S003885	41/F10		-0.49	SPAPB2B4.06		conserved hypothetical; hypothetical protein; possibly fungal specific
TI4896S002405	34/G04		-0.49	SPBP8B7.18c		conserved hypothetical; TENA/THI domain; similar to Sp SPBP8B7.17C and SPCC18B5.05C (paralogs); tandem duplication in pB8B7
TI4896S003008	45/D11		-0.49	SPAC1D4.03c		involved in intracellular protein transport; involved in protein-vacuolar targeting; Sc deletion hypersensitive to brefeldin A or monensin, two drugs that affect intracellular transport; SAND family protein
TI4896S002693	23/F03		-0.49	SPBC244.02c		HAT repeat protein
TI4896S002455	47/F10		-0.49	SPBC31F10.13c		WD repeat protein; hira protein; histone transcription regulator; similar to Sp slm9
TI4896S002193	45/C07		-0.49	SPBC609.04		MFS multidrug efflux transporter; similar to Sp SPAC17C9.16c
TI4896S002078	28/C06		-0.49	SPBC1703.04	mlh1	mutL homolog; involved in DNA repair; involved in mismatch repair
TI4896S000802	24/C07		-0.49	SPCC1620.02	wtf23; wtf10	wtf element
TI4896S003241	16/D10		-0.49	SPAC4C5.01		haloacid dehalogenase; similar to Sp SPCC1020.07 (paralog)
TI4896S004400	23/B11		-0.49	SPAC27E2.05	cdc1; mis1	DNA polymerase delta (small subunit); interacts physically with Cdc27p; interacts physically with Pol3p; involved in DNA replication (required); involved in cell cycle progression (required); involved in telomere maintenance
TI4896S003520	50/H09		-0.49	SPAPB1A10.13		hypothetical protein; glycoprotein
TI4896S003021	23/C06		-0.49	SPAC22F3.12c	rgs1	regulator of G-protein signalling; regulates pheromone response; involved in mating (required)
TI4896S003581	23/G01		-0.49	SPAC17H9.19c	cdt2	WD repeat protein; regulated by DSC1/MBF complex; involved in vegetative growth; involved in sporulation; non-essential; involved in DNA replication; functionally complemented by overexpression of suc22; deletion sensitive to HU; no apparent Sc ortholog
TI4896S004949	34/E06		-0.49	SPAP8A3.13c		sequence orphan; hypothetical protein
TI4896S001966	45/A11		-0.49	SPBC6B1.09c		FHA domain (phosphopeptide binding); low complexity region (C-terminal); similar to human NBS1; involved in DNA repair; involved in cell cycle checkpoint; BRCT domain
TI4896S003658	09/G02		-0.49	SPAC18G6.01c		hypothetical protein
TI4896S003287	46/A12		-0.49	SPAC6F12.08c		hypothetical protein; predicted coiled-coil regions; sequence orphan
TI4896S001553	36/B02		-0.49	SPBC21B10.09		acetyl-coenzyme A transporter
TI4896S002484	31/A08		-0.49	SPBC23E6.04c		ubiquitin-protein ligase (E3); associates with the 26S proteasome; HECT domain; ankyrin or armadillo repeats
TI4896S003081	28/H07		-0.49	SPAC2G11.09		conserved eukaryotic protein; Sc RSN1 is involved in tunicamycin sensitivity; DUF221
TI4896S003919	50/A09		-0.49	SPAC1805.15c	pub2	ubiquitin-protein ligase (E2); HECT domain; WW domain; C2 domain; constitutively expressed; function overlapping with Pub1p; post-translational modification, Cys639 can be thiol-ubiquitinated; similar to Sp SPBC16E9.11C and SPAC11G7.02
TI4896S002533	34/A05		-0.49	SPBC26H8.10	dis3	involved in the regulation of mitosis; involved in anaphase (required); exosome (RNase complex); 3'-5' exoribonuclease; involved in rRNA processing; essential; RNB domain; ribonuclease family signature; possibly binds directly to Ran and enhances the GEF activity of SPAC10F6.04 (check)
TI4896S004045	41/D06		-0.49	SPAC589.03c		sequence orphan; hypothetical protein
TI4896S003254	35/B09		-0.49	SPAC10F6.10		protein kinase (RIO family); RIO1 domain; similar to A. nidulans; SUDD suppressor of bimD6; chromosome-spindle attachment defect
TI4896S004168	09/H06		-0.49	SPAC959.07	rps403; rps4-3; rps4	40S ribosomal protein S4
TI4896S002875	45/E01		-0.49	SPAC12G12.15		Sad1-interacting factor 3; 1 predicted transmembrane helix; similar to S. cerevisiae YFR048W
TI4896S001500	50/G05		-0.49	SPBC11B10.05c	pi006; SPACTOKYO_453.30c	random septum position protein Rsp1; DNAJ domain protein; similar to S. pombe SPBC1773.09C; no apparent orthologs; non-essential
TI4896S004161	40/D06		-0.49	SPAC8E11.02c	rad24	involved in DNA repair; involved in DNA damage checkpoint; involved in G2/M phase transition; 14-3-3 protein; negatively regulates Byr2p by affecting its localization; overexpression results in cell cycle defects; similar to Sp rad25
TI4896S003458	47/E10		-0.48	SPAC105.01c		CPA2 potassium ion/proton antiporter
TI4896S004198	24/E09		-0.48	SPAC328.02		zinc finger protein; zf-C3HC4 type (RING finger); ubiquitin ligase (E3); TRIAD composite zinc finger domain; Ariadne-2-like (which is a ubiquitin conjugating enzyme e2-binding protein); IBR domain
TI4896S002941	40/H10		-0.48	SPAC24H6.03	pcu3	cullin family
TI4896S001914	34/E08		-0.48	SPBC365.07c		involved in transcriptional regulation; tata element modulatory factor tmf; predicted coiled-coil protein
TI4896S003788	19/B03		-0.48	SPAC23H3.05c		SET1 complex (TAP); WD repeat protein; involved in transcriptional silencing; involved in regulation of chromatin remodelling; similar to retinoblastoma binding proteins; non-essential; involved in H3 K4 methylation (required)
TI4896S003443	27/H07		-0.48	SPAC664.02c		actin-like protein
TI4896S003098	33/C07		-0.48	SPAC23G3.06		ribonucleoprotein complex; processome component; involved in rRNA processing; involved in ribosome biogenesis and assembly; snoRNA-binding protein
TI4896S003652	21/C06		-0.48	SPAC1783.04c	hst4	Sir2p family; transcriptional regulator; histone deacetylase activity; NAD-dependent histone deacetylase activity; involved in chromatin silencing; involved in centromere function; involved in chromatin assembly/disassembly; involved in transcriptional regulation
TI4896S003605	35/B11		-0.48	SPAC3C7.11c	cnx1; cal1	calnexin homolog
TI4896S002015	25/C04		-0.48	SPBC685.02	SPBC685.02	conserved hypothetical; conserved protein; no apparent Sc ortholog
TI4896S002634	21/H04		-0.48	SPBC16G5.05c		MSP domain protein; involved in sterol metabolism; involved in signal transduction; similar to Sp SPAC17C9.12
TI4896S004482	35/H01		-0.48	SPAC1F7.02c		DEAD/DEAH box helicase; ATP-dependent; RNA helicase
TI4896S003289	39/D08		-0.48	SPAC6F12.10c	ade3; min11	phosphoribosylformylglycinamidine synthase phosphoribosylformylglycinamidine synthase; involved in purine biosynthesis
TI4896S003545	19/H04		-0.48	SPAC3H1.10		phytochelatin synthetase; involved in cadmium resistance; no apparent Sc ortholog
TI4896S000725	34/H09		-0.48	SPCC18.05c		conserved hypothetical; WD repeat protein; notchless-like
TI4896S003066	22/C06		-0.48	SPAC16C9.01c	SPAC4G8.14c	pfkB family carbohydrate kinase; involved in RNA processing; involved in structural stability of L-A double-stranded RNA-(dsRNA-) containing particles
TI4896S003558	48/E02		-0.48	SPAC9G1.10c		inositol polyphosphate phosphatase
TI4896S003398	29/E11		-0.48	SPAC23H4.01c	SPAP27G11.01	involved in ergosterol biosynthesis; oxysterol binding protein; ankyrin repeat protein; pleckstrin homology domain; similar to Sp SPBC2F12.05c
TI4896S000900	23/B05		-0.48	SPCP1E11.03		hypothetical protein; arrestin family
TI4896S000504	18/F02		-0.48	SPCC1281.05		involved in protein targeting; involved in protein-nucleus import
TI4896S002889	47/B04		-0.48	SPAC630.02	SPAC12G12.01c	WD repeat protein (4)
TI4896S004534	16/F02		-0.48	SPAC23D3.02	rfc2	AAA family ATPase; replication factor C (activator 1 subunit); involved in DNA replication; activator of DNA polymerases
TI4896S004162	24/G07		-0.48	SPAC8E11.01c	SPAC959.01	glycosyl hydrolase family 32; invertase
TI4896S003383	19/E05		-0.48	SPAC23H4.16c		sequence orphan; hypothetical protein
TI4896S000039	43/H08		-0.48	SPCC330.10	pcm1	mRNA capping methyltransferase; methylates the terminal guanine residue of the mRNA cap
TI4896S003705	22/H12		-0.48	SPAC13G7.10		Myb family; DNA binding protein
TI4896S004989	45/F01		-0.48	SPAC1039.01		amino acid permease family; similar to Sp SPBC15C4.04C and SPAPB24D3.02C and SPCC74.04 and SPAC11D3.08C and SPCC584.13 and SPAC9.10 and SPCC794.03
TI4896S002460	34/D05		-0.48	SPBC21C3.01c	vps13a; SPBC31F10.18c	involved in intracellular protein transport
TI4896S002284	22/A04		-0.48	SPBC3B8.10c		protein phosphatase; involved in stress response; NLI interacting factor family
TI4896S001202	25/B05		-0.48	SPBC661.01	SPBC530.15c	phosphatidylserine decarboxylase; involved in phosphatidylcholine biosynthesis; phosphatidylserine decarboxylase activity; localization mitochondrial inner membrane; similar to Sp SPBC16E9.18
TI4896S002548	16/E08		-0.48	SPBC3B9.10	vti1	SNARE; involved in secretory pathway; involved in vacuole fusion
TI4896S001615	48/A04		-0.48	SPBC18H10.16		putative membrane transporter; CCC Na-K-Cl transporter
TI4896S000863	25/D08		-0.48	SPCC965.10		transcriptional regulator; zinc finger protein; zf-fungal Zn(2)-Cys(6) binuclear cluster domain
TI4896S001784	20/E05		-0.48	SPBC14C8.03		methionine metallopeptidase
TI4896S000214	23/D08		-0.48	SPCC1672.10		WD repeat protein; involved in chromosome assembly; no apparent Sc ortholog
TI4896S003926	28/A08		-0.48	SPAC3F10.01	nda4; mcm5; SPAC1B2.05	MCM complex subunit; AAA family ATPase; involved in DNA replication (initiation) (required); ATP dependent; DNA helicase activity
TI4896S001013	35/H12		-0.48	SPBC1271.10c		membrane transporter; unknown specificity; non-essential
TI4896S004223	18/D10		-0.48	SPAC16E8.16		transcription initiation factor TFIIB
TI4896S000318	27/C08		-0.48	SPCC63.11	prp28	DEAD/DEAH box helicase; U5 snrnp-like RNA helicase; involved in mRNA splicing
TI4896S000958	10/F02		-0.48	SPBC660.06		hypothetical glycine rich protein; WW domain
TI4896S000479	47/H01		-0.47	SPCC132.01c	SPCC1322.17c	conserved hypothetical; conserved eukaryotic protein
TI4896S003535	37/D04		-0.47	SPAP14E8.06c	orp3; orc3; SPAC3H1.01c	origin recognition complex (subunit 3)
TI4896S004601	14/B01		-0.47	SPAC1851.03	ckb1	casein kinase II (beta subunit)
TI4896S004693	38/F04		-0.47	SPAC458.03		leucine-rich repeat protein; involved in telomere maintenance; involved in telomerase-dependent telomere maintenance
TI4896S000687	46/G09		-0.47	SPCC1223.01	SPCC285.18	zinc finger protein; zf-C2H2 type; zf-C3HC4 type (RING finger); ubiquitin ligase (E3)
TI4896S002270	45/E08		-0.47	SPBC17D1.08	SPBC11C11.01	conserved hypothetical; hypothetical protein; rrm RNA recognition motif; no apparent Sc ortholog
TI4896S000089	24/C12		-0.47	SPCC794.10		UTP-glucose-1-phosphate uridylyltransferase activity; involved in protein amino acid glycosylation; similar to Sp�@SPCC1322.04 (paralog); (old-> putative UTP-glucose-1-phosphate)
TI4896S002784	21/E05		-0.47	SPAC1F8.04c		chlorohydrolase/deaminase; guanine deaminase; no apparent Sc ortholog
TI4896S002023	20/D07		-0.47	SPBC32F12.01c	SPBC685.10c	sphingomyelinase family; involved in lipid metabolism
TI4896S003207	38/C09		-0.47	SPAC30D11.03		DEAD/DEAH box helicase; helicase C-terminal domain; involved in 35S transcript processing; ATP-dependent; RNA helicase
TI4896S001007	33/D06		-0.47	SPBP26C9.03c		metal permease
TI4896S003929	24/C01		-0.47	SPAC3F10.04	gsa1; gsh2	glutathione synthetase; involved in glutamate metabolism; involved in glutathione biosynthesis; involved in cadmium resistance; involved in phytochelatin synthesis; functionally complemeted by A. thaliana gsh2; subunit data; expression regulated by the Atf1-Spc1-Wis1 signaling pathway
TI4896S004902	21/H08		-0.47	SPAC19D5.07		4-aminobutyrate aminotransferase (GABA transaminase)
TI4896S004058	20/G07		-0.47	SPAC688.06c		hypothetical protein; sequence orphan
TI4896S004194	15/F03		-0.47	SPAC3A11.03		eukaryotic conserved protein
TI4896S001191	36/D07		-0.47	SPBC530.04		non-essential; serine-rich protein; involved in cell polarity; no apparent orthologs; carboxy-terminal prenylation signal
TI4896S001853	35/E03		-0.47	SPBC19G7.09	ulp1	Ulp1 protease family; peptidase family C48; cysteine protease; Pmt3 (SUMO)-specific protease; involved in protein deubiquitination and protein desumoylation; non-essential; involved in nuclear morphology maintenance
TI4896S003958	21/D04		-0.47	SPACUNK4.13c		GTP-binding protein; GTP1/OBG family
TI4896S000188	47/F11		-0.47	SPCC970.01	rad16; rad10; rad20; swi9	ss DNA endonuclease; involved in DNA repair; involved in mating-type determination; involved in nucleotide-excision repair; involved in meiotic recombination; involved in meiotic gene conversion (required); ERCC4 domain
TI4896S004877	24/F12		-0.47	SPAC29A4.02c	tef3	elongation factor 1 (gamma subunit)
TI4896S002978	30/F07		-0.47	SPAC2F7.16c		phospholipase D; phosphoinositide binding
TI4896S002802	48/F05		-0.47	SPAC11D3.15		oxoprolinase; similar to Sp SPAC11D3.14c (paralog)
TI4896S004404	34/C08		-0.47	SPAC27E2.09	mak2	histidine kinase; involved in signal transduction; His-to-Asp phosphorelay; non-essential; functions upstream of Spy1p; function overlapping with Mak1p and Mak3p; implicated in mitotic cell cycle control; implicated in oxidative stress response; required for the regulation of sexual development; PAC domain protein; similar to Sp mak1 and mak3; response regulator receiver domain
TI4896S002402	23/D03		-0.47	SPBP8B7.15c		zinc finger protein; zf-CCHC type (zinc knuckle)
TI4896S001052	38/H03		-0.47	SPBC582.11c	nup107; SPBC428.01c	nucleoporin; nuclear pore complex (putative); essential
TI4896S002050	49/F03		-0.47	SPBP19A11.03c	mts4	19S proteasome (regulatory subunit); interacts physically with Mts2p; PC repeats; essential
TI4896S001640	10/G07		-0.46	SPBC3H7.10		hypothetical protein; conserved in human, D. melanogaster, mouse; no apparent Sc ortholog
TI4896S002437	27/A10		-0.46	SPBC13G1.08c		SET1 complex (TAP); SPRY domain; zf-PHD finger; involved in transcriptional regulation, transcriptional silencing, regulation of chromatin remodeling; non-essential; histone H3 K4 methylation
TI4896S002672	33/E02		-0.46	SPBC543.04		conserved hypothetical; hypothetical protein; UPF0171
TI4896S004625	21/E06		-0.46	SPAC637.12c	mst1	MYST-family HAT (pers. comm. S. Forsburg); histone acetyltransferase; MOZ/SAS domain; chromodomain protein; involved in transcriptional silencing
TI4896S002562	32/E11		-0.46	SPBC215.05	gpd1	glycerol-3-phosphate dehydrogenase; induced by osmotic stress; similar to Sp gpd2 (paralog)
TI4896S001327	09/G07		-0.46	SPBC409.02c	SPBC1709.19c	conserved NifU-like protein; involved in ion homeostasis
TI4896S003050	24/H07		-0.46	SPAC22G7.09c		nucleoporin; nuclear pore complex; involved in nuclear export of the small ribosomal subunit
TI4896S004755	30/F11		-0.46	SPAC4F10.16c		P-type ATPase; P4 type; aminophospholipid translocase
TI4896S001706	39/A07		-0.46	SPBC29A3.01		heavy metal ATPase; P1 type; similar to S. cerevisiae YDR270W; disease associated Menkes/Wilson disease; 8 predicted transmembrane helices
TI4896S000263	49/C07		-0.46	SPCPJ732.02c		xylulose kinase; FGGY family
TI4896S003113	22/B10		-0.46	SPAC1687.03c	rfc4	replication factor C (activator 1 subunit); activator of DNA polymerases
TI4896S001934	51/D03		-0.46	SPBC29A10.11c	vps902; vps9b	guanyl-nucleotide exchange factor activity; involved in intracellular protein transport; involved in protein-vacuolar targeting; CUE domain protein (inferred from context); involved in endocytosis; similar to Ras inhibitors
TI4896S000344	45/G11		-0.46	SPCC24B10.07		serine/threonine protein kinase; AGC family; TOR signaling pathway; non-essential; involved in conjugation (required); involved in the regulation of G1 progression; phosphorylated by Tor1p; C2 domain (SMART)
TI4896S000308	11/F02		-0.46	SPCC2H8.04		sequence orphan; hypothetical protein
TI4896S002363	38/H02		-0.46	SPBC887.09c		leucine-rich repeat protein
TI4896S001722	26/B01		-0.46	SPBC29A3.17		RhoGEF; guanine nucleotide exchange factor; similar to Sp gef1; no apparent Sc ortholog
TI4896S003119	30/F10		-0.46	SPAC1687.09		conserved hypothetical protein; predicted EF hand; serine-rich protein; no apparent orthologs
TI4896S004833	38/E02		-0.46	SPAC22E12.11c		involved in transcriptional regulation; zinc finger protein; zf-PHD finger; SET domain; histone lysine methyltransferase
TI4896S000120	23/F10		-0.46	SPCC594.02c		hypothetical protein
TI4896S003295	30/D09		-0.46	SPAC6F12.16c		DEAD/DEAH box helicase; ATP-dependent RNA helicase; involved in mRNA export
TI4896S003428	44/B07		-0.46	SPAC343.14c		translation initiation factor eif-2b (beta subunit)
TI4896S003756	20/D10		-0.46	SPAC6B12.08		zinc finger protein; zf-C2H2 type; DNAJ domain protein
TI4896S000257	47/G04		-0.46	SPCC16C4.14c	sfc4	RNA polymerase III transcription factor (TFIIIC subunit); Brf-associated binding subunit; predicted to bind SPBC13E7.10c (brf); TPR repeat protein
TI4896S003765	15/H05		-0.46	SPAC32A11.04c	tif212; tif22; SPAC6B12.17c	eukaryotic translation initiation factor 2 beta subunit
TI4896S001912	18/A01		-0.46	SPBC365.05c	slu7	zinc finger protein; zf-CCHC type (zinc knuckle); complexed with Cdc5p; involved in mRNA splicing (2nd step)
TI4896S003018	15/C10		-0.46	SPAC1D4.13	ste1; byr1; ste3	serine/threonine protein kinase; MAP kinase kinase (MAPKK); involved in conjugation; involved in sporulation; pheromone signalling pathway
TI4896S003034	43/D11		-0.46	SPAC1296.02	cox4	cytochrome c oxidase
TI4896S002657	26/A11		-0.46	SPBC16A3.12c		triglyceride lipase-cholesterol esterase; similar to Sp SPCC1672.09
TI4896S000451	38/G02		-0.46	SPCC645.08c		RNA-binding protein; tudor domain; p100 co-activator ortholog; TFIIE-interacting; no apparent Sc ortholog
TI4896S002095	10/F10		-0.46	SPBC2A9.07c		hypothetical protein; sequence orphan
TI4896S000543	51/E11		-0.46	SPCC188.03	cnd3	condensin subunit; non-SMC subunit; XCAP-G; essential; involved in chromosome condensation (required)
TI4896S001650	33/A12		-0.46	SPBC3H7.01	stl1; spo14; SPBP16F5.01c	WD repeat protein; 1 predicted transmembrane helix; required for the formation of transport vesicles from the ER; This function involves the cytoplasmic domain of the protein, which is thought to interact with the small GTP-binding protein sar1; involved in sporulation (required); involved in spore wall assembly (required); essential
TI4896S000792	35/E12		-0.46	SPCC126.07c		zinc finger protein; zf-PHD finger; zf-C3HC4 type (RING finger); ubiquitin ligase (E3); involved in transcriptional regulation
TI4896S000540	47/H06		-0.46	SPCC11E10.08	rik1	involved in chromatin silencing; involved in chromatin silencing at silent mating type cassettes (sensu Fungi) (required); similar to Sp SPAC17H9.10C (paralog)
TI4896S001171	19/F09		-0.46	SPBC119.15		conserved hypothetical; ATP-binding protein
TI4896S003628	21/C11		-0.46	SPAC23C11.04c	pnk1	DNA kinase/phosphatase; DNA repair protein
TI4896S001293	37/C04		-0.46	SPBC337.17c	SPBC1734.01c	hypothetical protein; Sc YDR365C is null-letha
TI4896S004497	23/B01		-0.45	SPAC21E11.06	tif224	translation initiation factor eIF-2B delta
TI4896S002111	24/E07		-0.45	SPBC2D10.13	est1	TPR repeat protein; EST1 domain; involved in telomere maintenance; involved in telomerase-dependent telomere maintenance; involved in telomerase regulation; involved in transcriptional silencing; similar to Sp SPBC2F12.03c
TI4896S004652	21/A02		-0.45	SPAC30C2.04		cofactor for methionyl-and glutamyl-tRNA synthetases; G4 quadruplex nucleic acid binding protein
TI4896S001140	27/H06		-0.45	SPBC947.10		zf-C3HC4 type (RING finger); ubiquitin ligase (E3)
TI4896S000320	07/B08		-0.45	SPCC63.13		conserved hypothetical; DnaJ domain protein
TI4896S000313	13/H06		-0.45	SPCC63.05		phosphatase component
TI4896S001709	32/A03		-0.45	SPBC29A3.04	rpl7a; rpl8-1	60S ribosomal protein L7a (L8)
TI4896S004062	30/H03		-0.45	SPAC688.10	rev1	DNA polymerase zeta (catalytic subunit); involved in DNA repair, error-prone translesion synthesis
TI4896S000856	18/C08		-0.45	SPCC965.03		vacuolar ATP synthase subunit; V-type ATPase (D subunit); vacuolar proton pump component; V1 sector
TI4896S003165	23/H06		-0.45	SPAC139.05		succinate semialdehyde dehydrogenase; involved in glutamate metabolism, tyrosine metabolism; similar to Sp SPAC1002.12C (paralog)
TI4896S001053	18/A10		-0.45	SPBC428.02c	eca39; SPBC582.12c	branched chain amino acid aminotransferase; phosphate dependent; involved in leucine biosynthesis; involved in valine biosynthesis; involved in isoleucine biosynthesis; non-essential
TI4896S003492	24/B12		-0.45	SPAC1002.12c		succinate-semialdehyde dehydrogenase; involved in glutamate metabolism; involved in tyrosine metabolism
TI4896S001336	34/G12		-0.45	SPBC409.11	meu18	predicted coiled-coil; NLS; meiotic expression upregulated; no apparent orthologs
TI4896S003422	19/F04		-0.45	SPAC343.09		involved in glycogen metabolism; UBX domain (4others)
TI4896S000999	19/A01		-0.45	SPBC1773.11c		conserved hypothetical; CDC50 domain protein; similar to Sp SPBC11B10.07C
TI4896S004221	14/C09		-0.45	SPAC16E8.14c		conserved hypothetical; conserved protein; methyltransferase
TI4896S003181	20/D06		-0.45	SPAC23C4.16c		lipase; lipase 3 domain
TI4896S000698	20/A01		-0.45	SPCC1223.12c	meu10	involved in cell wall biosynthesis; meiotic expression upregulated; involved in spore wall assembly (required); similar to Sp SPAC1705.03c; GPI anchored protein (pers. comm. Birgit Eisenhaber)
TI4896S001776	40/D10		-0.45	SPBC17G9.09	tif213	translation initiation factor 2 (gamma subunit)
TI4896S003661	21/G12		-0.45	SPAC18G6.04c	shm2	serine hydroxymethyltransferase; involved in glycine metabolism; involved in serine metabolism; involved in one-carbon compound metabolism; glycine hydroxymethyltransferase activity
TI4896S001468	50/E06		-0.45	SPBC691.01	pi035; SPBC17A3.11	hypothetical protein; human reduced expression conserved protein; human reduced expression in cancer protein homolog; zinc finger protein; zf-DHHC type; palmitoyltransferase activity; involved in palmitoylation
TI4896S004882	34/F11		-0.45	SPAC26F1.10c	pyp1	protein-tyrosine phosphatase; negative regulator of mitosis; negative regulator of nutrient monitoring pathways; dephosphorylate an osmosensing MAP kinase controlling cell size at division; similar to Sp pyp2
TI4896S003147	21/D10		-0.45	SPAC821.02c	csn3; SPAC222.16c	COP9/signalosome complex (subunit 3); no apparent Sc ortholog
TI4896S003780	36/G01		-0.45	SPAC19A8.05c	vps27	zinc finger protein; zf-FYVE type; involved in Golgi-vacuole transport; complexed with SPBC1734.08; sorting receptor for ubiquitinated membrane proteins (ISS); involved in protyolysis
TI4896S004077	45/F02		-0.45	SPAC3G9.11c		pyruvate decarboxylase; similar to Sp SPAC13A11.06
TI4896S002740	49/D07		-0.45	SPBPB2B2.12c		bifunctional enzyme; UDP-glucose 4-epimerase; aldose 1-epimerase
TI4896S002840	45/H10		-0.45	SPAC24B11.11c	sid2	Sid2p-Mob1p kinase complex; serine/threonine protein kinase; SIN component; protein kinase C terminal domain; involved in cytokinesis (required); involved in septation (required); spindle pole body kinase; expression peaks at M-G1 phase; regulated by PBF transcription complex; protein kinase activity Mob1p dependent; phosphoprotein; similar to S. cerevisiae YGR092W and YPR111W; essential
TI4896S001144	24/C04		-0.45	SPBC947.06c		unknown specificity; transporter; similar to SpSPAC11D3.05 and SPCC794.04C and SPCC569.05C and SPBC36.03C and SPBC36.01C and SPBC36.02C and SPBC530.02 and SPBC530.15c; involved in amine/polyamine transport; (old->MSF membrane transporter)
TI4896S004308	34/B03		-0.45	SPAP7G5.04c	lys1	aminoadipate-semialdehyde dehydrogenase
TI4896S003870	44/B10		-0.45	SPAC644.09		UPF0001 family; proline synthase; pyridoxal phosphate cofactor
TI4896S003239	24/H08		-0.45	SPAC22A12.16		ATP-citrate synthase (subunit 2) (similar to ATP-citrate synthase N-terminal domain); involved in tricarboxylic acid cycle; involved in citrate metabolism; involved in ATP catabolism; involved in acetyl CoA biosynthesis; involved in fatty acid biosynthesis; ATP citrate synthase activity; no apparent Sc ortholog
TI4896S003303	36/F07		-0.45	SPAC57A10.05c	pof1	F-box protein; involved in sulfur metabolism; involved in protein ubiquitination
TI4896S004031	21/G01		-0.45	SPAC24C9.12c		serine hydroxymethyltransferase; involved in glycine metabolism; involved in serine metabolism; glycine hydroxymethyltransferase activity
TI4896S003565	30/A02		-0.45	SPAC17H9.02		DEAD/DEAH box helicase; involved in mRNA export
TI4896S000327	24/F09		-0.45	SPCC16A11.06c		alpha-1,2 mannosyltransferase; involved in GPI anchor biosynthesis
TI4896S003763	21/E12		-0.45	SPAC6B12.15	cpc2; rkp1	guanine nucleotide regulatory protein; WD repeat protein; mammalian RACK1 homolog; phosphorylated by Ran1p; involved in conjugation; involved in sporulation; involved in actin cytoskeletal organization; protein kinase C-Pck2-signaling pathway; interacts with pleckstrin homology domain to modulate Pck2-mediated signaling process
TI4896S001863	33/E11		-0.45	SPBC36B7.03		localization SRP receptor complex; SRP receptor activity; involved in intracellular protein transport; involved in protein-ER targeting; involved in SRP-dependent cotranslational membrane targeting; DNAJ domain protein
TI4896S000657	36/A01		-0.45	SPCC1442.02	SPCC1450.18	hypothetical protein; sequence orphan
TI4896S002173	26/G10		-0.45	SPBC1778.10c	SPBC4C3.11	phosphoinositide-dependent protein kinase 1; serine/threonine protein kinase; PKC subfamily; similar to Sp ksg1 (paralog)
TI4896S003046	26/G11		-0.45	SPAC22G7.05		involved in ribosome biogenesis and assembly; predicted coiled-coil protein; interacts physically with Mis3p
TI4896S002119	40/G11		-0.45	SPBC15D4.01c	klp1; SPBC2D10.21c	kinesin-like protein
TI4896S001769	44/B04		-0.44	SPBC17G9.02c		RNA polymerase II accessory protein; Cdc73 family
TI4896S004153	16/C12		-0.44	SPAC26A3.16		ubiquitin family protein; UBA domain; ubiquitin-binding protein; involved in protein deubiquitination; central region has repeat containing domain, possibly related to TPR repeats
TI4896S004251	25/E05		-0.44	SPAC17G6.10		Myb family; DNA binding protein; involved in transcriptional regulation; involved in chromatin remodeling
TI4896S003561	44/G09		-0.44	SPAC9G1.13c		Myb family; DNA binding protein
TI4896S000436	24/D05		-0.44	SPCC550.10	meu8	betaine aldehyde dehydrogenase; involved in betaine biosynthesis from choline; involved in meiosis; betaine-aldehyde dehydrogenase activity; meiotic expression upregulated; no apparent Sc ortholog
TI4896S002346	48/F07		-0.44	SPBC1105.10		involved in regulation of (H+)-ATPase in vacuolar membrane
TI4896S002320	25/D04		-0.44	SPBC2G2.11		glycylpeptide N-tetradecanoyltransferase; involved in N-terminal protein myristoylation
TI4896S002374	45/F09		-0.44	SPBC418.01c	his4; SPBC887.20c	bifunctional enzyme; 1-(5-phosphoribosyl)-5-[(5-phosphoribosylamino) methylideneamino]imidazole-4-carboxamide isomerase; involved in histidine biosynthesis (4th step); glutamine amidotransferase
TI4896S003346	36/C04		-0.44	SPAC9.10		amino acid permease family; similar to Sp SPBC15C4.04C and SPAPB24D3.02C and SPCC74.04 and SPAC1039.01 and SPAC11D3.08C and SPCC584.13 and SPCC794.03
TI4896S002821	28/B09		-0.44	SPAC13G6.03		involved in glycosylphospatidylinositol modification; phosphoethanolamine N-methyltransferase activity
TI4896S000557	28/E08		-0.44	SPCC584.15c		conserved protein; calcium binding protein
TI4896S001077	19/A09		-0.44	SPBC902.06		MT organizer; coiled-coil region; non-essential; no apparent orthologs; Mto2 and the EMTOC are critical for anchoring the cytokinetic actin ring to the medial region of the cell, and for the proper coordination of mitosis with cytokinesis; Mto2 promotes the ability of Mto1 to recruit the gamma tubunlin complex to a subset of MTOCs away from the spindle pole body
TI4896S000069	34/E03		-0.44	SPCC1235.14	ght5	hexose transporter; similar to Sp GHT1 and GHT2 and GHT4 and GHT3 and GHT6 and SPCC548.06C and SPBC1348.14C; tandem duplication
TI4896S002057	33/E08		-0.44	SPBP4H10.04	ppb1; SPBC1346.01c	serine/threonine protein phosphatase (2b catalytic subunit); calcineurin-like protein; involved in cytokinesis (required); involved in cell separation; involved in cell polarity; involved in conjugation; involved in spindle pole body positioning; coordinately regulates cytokinesis with Its3p; involved in septation (required); expression peaks at M-G1 phase; regulated by PBF transcription complex
TI4896S000297	30/C12		-0.44	SPCC1393.05		hypothetical protein; sequence orphan
TI4896S000110	37/G09		-0.44	SPCC736.07c		hypothetical protein; sequence orphan
TI4896S004622	26/C11		-0.44	SPAC637.09		ribonuclease H
TI4896S003995	50/C03		-0.44	SPAC31G5.01	sap49; SPAPB1A11.05	RNA-binding protein; rrm RNA recognition motif; involved in mRNA splicing
TI4896S002659	24/H02		-0.44	SPBC16A3.10		membrane bound O-acyltransferase (MBOAT)
TI4896S004620	35/D10		-0.44	SPAC637.07	moe1	eIF3 translation initiation factor 3; involved in microtubule cytoskeleton organization and biogenesis; involved in microtubule disassembly, chromosome segregation, and spindle formation; required for stable association of eIF3 subunits; no apparent Sc ortholog
TI4896S001172	44/C08		-0.44	SPBC119.16c		hypothetical protein
TI4896S002690	21/G08		-0.44	SPBC16C6.12c		involved in cellular morphogenesis; involved in actin cytoskeletal organization (regulation); involved in cell polarity
TI4896S003703	24/D08		-0.44	SPAC13G7.08c	crb3	WD repeat protein; DNA damage and replication checkpoint control protein; essential
TI4896S004614	27/E02		-0.44	SPAC27D7.13c	ssm4; SPAC637.01c	p150-Glued; microtubule-associated protein; expressed during meiosis; CAP-Gly domain; similar to S. cerevisiae YPL174C
TI4896S000465	38/E06		-0.44	SPCC1322.03		hypothetical protein
TI4896S001498	50/F05		-0.44	SPBC11B10.03	pi008; SPACTOKYO_453.28c	Golgi transport complex subunit; conserved eukaryotic protein
TI4896S004888	17/F03		-0.44	SPAC26F1.04c		zinc binding dehydrogenase
TI4896S001754	17/E09		-0.44	SPBC1711.03		eukaryotic conserved protein
TI4896S001069	20/F09		-0.44	SPBC428.18	cdt1	involved in DNA replication (initiation) (required); regulated by DSC1/MBF complex; essential; involved in DNA replication (required); involved in mitosis (inhibition) (required); no apparent Sc ortholog; expressed at G1-S phase; regulated by DSC1/MBF complex
TI4896S001998	21/A09		-0.44	SPBC18A7.01	SPBC4F6.19c	aminopeptidase; dipeptidase; metallopeptidase; peptidase family M24; no apparent Sc ortholog
TI4896S004650	13/E08		-0.44	SPAC30C2.02		HEAT repeat
TI4896S003074	39/D12		-0.44	SPAC2G11.02		hypothetical protein hypothetical protein; similar to Sp cut1
TI4896S000211	39/B02		-0.44	SPCC1672.07		beta transducin WD repeat protein; U3 snoRNP protein
TI4896S003476	37/E12		-0.44	SPAC17A5.15c		glutamate-tRNA ligase; involved in glutamyl-tRNA aminoacylation; glutamate-tRNA ligase
TI4896S001655	33/A06		-0.44	SPBP16F5.06		involved in ribosome biogenesis and assembly; rrm RNA recognition motif; RNA-binding protein
TI4896S004280	06/A01		-0.44	SPAC8C9.16c		hypothetical protein; TLDc domain
TI4896S001937	51/E03		-0.44	SPBC29A10.14	rec8	involved in meiotic recombination (required); cohesin complex (meiotic); centromeric cohesin complex (meiotic); armassociated cohesin complex (meiotic)
TI4896S000980	12/A08		-0.44	SPBC800.06		eukaryotic conserved protein; Brix domain; involved in RNA processing; RNA-binding protein; involved in ribosome biogenesis and assembly
TI4896S002199	24/F03		-0.44	SPBC776.05		transporter; unknown specificity
TI4896S001697	22/F05		-0.44	SPBP23A10.08		actin-related protein
TI4896S001494	49/H11		-0.44	SPBC32H8.13c	mok12; SPACTOKYO_453.25c	a-1,3-glucan synthase; alpha glucan synthase; glycosyl transferase family 1; similar to Sp MOK1 and MOK11 and MOK13 and MOK14; no apparent Sc ortholog; involved in cell wall biosynthesis
TI4896S002607	10/H10		-0.44	SPBC14F5.01	SPBC1861.10	hypothetical protein; sequence orphan
TI4896S002715	20/B01		-0.43	SPBC1289.11	spf38; cwf17	small nuclear ribonucleoprotein (snRNP) U5 particle component; WD repeat protein; complexed with Cdc5p; involved in mRNA splicing; no apparent Sc ortholog
TI4896S000977	37/C08		-0.43	SPBC800.03	clr3	histone deacetylase; NAD-independent histone deacetylase activity; histone deacetylase (H3 K14 specific); HDA1-like (class II); cryptic loci regulator; involved in chromatin silencing; involved in chromatin silencing of rDNA (required); involved in chromatin silencing at silent mating type cassettes (sensu Fungi) (required)
TI4896S000580	08/H08		-0.43	SPCC162.01c		nucleic acid binding protein; similar to human RY-1; no apparent Sc ortholog
TI4896S002818	15/G07		-0.43	SPAC5H10.13c	gmh2	alpha-1,2-galactosyltransferase Gmh2; GMA12/MNN10 family; belongs to the glycosyltransferase 34 family; predicted N-terminal signal sequence; similar to S. pombe gmh3 and gmh1 and gma12 and SPBC1289.13C and SPAC5H10.13C and SPAC637.06 and SPBC8D2.17
TI4896S002000	38/H09		-0.43	SPBC336.01	fdh1; fdh	DNA helicase; F-box; stimulated by single-stranded DNA-binding protein at low ATP concentration; similar to Sp srs2 (paralog); no apparent Sc ortholog
TI4896S000865	20/A02		-0.43	SPCC965.12		dipeptidase; no apparent Sc ortholog; non-essential
TI4896S003540	24/B09		-0.43	SPAC3H1.05		CAAX prenyl protease; peptidase family M48
TI4896S000109	46/A03		-0.43	SPCC736.06		aspartyl-tRNA synthetaseaspartate-tRNA ligase; involved in aspartyl-tRNA aminoacylation; aspartate-tRNA ligase activity
TI4896S002805	24/B10		-0.43	SPAC11D3.18c		membrane transporter; unknown specificity; similar to Sp SPAC1039.04 and SPAC1683.12 and SPAC1002.16C
TI4896S000471	25/D10		-0.43	SPCC1322.09		conserved hypothetical; hypothetical protein; similar to N. crassa NCU02899.1; no apparent Sc ortholog
TI4896S004085	28/E11		-0.43	SPAC1486.03c		G-patch domain; putative septin interacting by similar to D. melanogaster SIP1; no apparent Sc ortholog
TI4896S000523	35/A10		-0.43	SPCC622.15c		hypothetical protein; sequence orphan
TI4896S003777	30/B05		-0.43	SPAC19A8.08	upf2	involved in the regulation of translation
TI4896S004205	18/E03		-0.43	SPAC328.09		mitochondrial carrier
TI4896S004349	15/C01		-0.43	SPAC1071.05		conserved hypothetical protein
TI4896S004030	28/H02		-0.43	SPAC24C9.11		MIF4G domain; MA3 domain; involved in signal transduction
TI4896S001800	46/D01		-0.43	SPBC15C4.02		ABC1 domain protein; involved in electron transfer; E. coli homolog is required for ubiquinone producution
TI4896S002549	18/E09		-0.43	SPBC3B9.11c	ctf1	involved in transcription termination; involved in polyadenylation; rrm RNA recognition motif; RNA-binding protein
TI4896S003397	36/B12		-0.43	SPAC23H4.02		serine/threonine protein kinase; similar to Sp SPCC74.03C (paralog)
TI4896S001165	35/A07		-0.43	SPBC119.10		asparagine synthetase
TI4896S001587	38/H08		-0.43	SPBC2F12.03c		TPR repeat protein; EST1 domain; similar to Sp SPBC2D10.13
TI4896S000503	14/G03		-0.43	SPCC1281.04		aldo/keto reductase; pyridoxal reductase homolog
TI4896S002391	29/A10		-0.43	SPBP8B7.04		sequence orphan; hypothetical protei
TI4896S001815	46/F10		-0.43	SPBC16H5.10c	prp43	RNA helicase; involved in mRNA splicing
TI4896S002446	36/A12		-0.43	SPBC31F10.04c	srb4	RNA polymerase II holoenzyme component; mediator complex subunit; essential
TI4896S002311	30/B10		-0.43	SPBC2G2.02		phosphatidylinositol phosphate phosphatase; synaptojanin-like
TI4896S003627	36/D05		-0.43	SPAC23C11.03		U3 snoRNP component; ribonucleoprotein (RNP) complex; processome component; involved in rRNA processing
TI4896S000050	24/F05		-0.43	SPCC320.08		DUF6; no apparent Sc ortholog
TI4896S002788	51/H03		-0.43	SPAC1F8.08		hypothetical protein; sequence orphan
TI4896S004817	38/B10		-0.43	SPAC890.03		serine/threonine protein kinase
TI4896S004445	38/C12		-0.43	SPAC26H5.04		involved in vacuolar import and degradation; armadillo repeat protein
TI4896S002685	45/B07		-0.43	SPBC16C6.07c	rpt1	19S proteasome regulatory subunit; AAA family ATPase
TI4896S000379	19/H06		-0.43	SPCC895.04c	ufe1	SNARE; involved in secretory pathway; involved in retrograde transport from the golgi
TI4896S003993	50/E01		-0.43	SPAPB1A11.03		putative FMN dependent dehydrogenase; similar to FMN dependent dehydrogenase; cytochrome b2 (l-lactate dehydrogenase); SPAPB1A11.03 lacks Sc CYB2 the N-terminal heme binding domain
TI4896S002982	24/A02		-0.43	SPAC13A11.02c	cyp51	probable cytochrome P450 51
TI4896S000198	30/H05		-0.43	SPCP31B10.09	SPCC962.01	conserved hypothetical; C2 domain; similar to Sp SPCP31B10.06
TI4896S001894	24/E05		-0.43	SPBC12C2.06		DEAD/DEAH box helicase; ATP-dependent; RNA helicase; involved in mRNA expor
TI4896S004994	19/H08		-0.43	SPAC1039.06		metal activated pyridoxal enzyme; involved in amino acid metabolism
TI4896S001050	17/C06		-0.43	SPBC582.09		involved in peroxisome biogenesis; involved in medium-chain fatty acid beta-oxidation
TI4896S003615	41/F01		-0.43	SPAC20H4.02		guanine nucleotide binding protein
TI4896S000547	41/A06		-0.43	SPCC188.08c	ubp5; ubp22	ubiquitin C-terminal hydrolase activity; peptidase family C19; similar to Sp ubp21 (paralog); double mutant ubp21 delta/ubp22 delta lethal; MATH domain (SMART)
TI4896S000950	45/A05		-0.42	SPBC1198.08		peptidase family M20
TI4896S003299	19/D07		-0.42	SPAC57A10.01	pas1; SPAC19E9.03	Pcl-like cyclin; involved in start control point of mitotic cell cycle; activator of the Res2p-Cdc10p transcriptional factor complex
TI4896S001474	49/E07		-0.42	SPBP22H7.02c	pi029; SPACTOKYO_453.05c	RNA-binding protein; rrm RNA recognition motif; involved in ribosome biogenesis and assembly
TI4896S001561	41/A05		-0.42	SPBC21B10.01c	cdc28; prp8; SPBC19C2.01; SPBC874.01	RNA helicase; ATP-dependent; involved in mRNA splicing
TI4896S004541	22/D12		-0.42	SPAC23D3.09		actin-related protein
TI4896S002343	44/H07		-0.42	SPBC1105.07c		conserved eukaryotic protein; PINT/PCI domain
TI4896S001967	36/G09		-0.42	SPBC6B1.10		WD repeat protein; involved in mRNA splicing; complexed with Cdc5p
TI4896S002553	30/D02		-0.42	SPBC3B9.15c		WD repeat protein; 5 predicted transmembrane helices; predicted N-terminal signal sequence; sterol sensing domain; no apparent S. cerevisiae ortholog
TI4896S002330	46/E05		-0.42	SPBC1718.04		phosphate acyltransferase (SMART); involved in phospholipid biosynthesis; SCT1 is a suppressor of a choline transport mutant; similar to protein mutated in Barth syndrome
TI4896S003782	36/C09		-0.42	SPAC19A8.03		phosphatidylinositol 3-phosphate phosphatase; similar to protein tyrosine phosphatases myotubularin-like
TI4896S001173	47/G06		-0.42	SPBC577.01	SPBC119.17	peptidase family M16; zinc metallopeptidase
TI4896S000755	24/A12		-0.42	SPCC1739.06c		uroporphyrin methyltransferase
TI4896S003894	44/A11		-0.42	SPAC6F6.08c	cdc16; bub2	TBC domain protein; involved in spindle assembly checkpoint; involved in cytokinesis; involved in septation (regulation) (negative); GTPase-activating protein of Rab-like GTPase; GAP for Spg1p; essential; two-component GEF for the GTPase spg1 (with byr4)
TI4896S000478	43/H06		-0.42	SPCC1322.16		prohibitin; involved in cell aging; involved in proteolysis
TI4896S004988	45/G04		-0.42	SPAC29B12.14c		purine transporter; similar to Sp FUR4
TI4896S003084	39/D09		-0.42	SPAC2G11.12	rqh1; hus2; rad12	ATP-dependent DNA helicase Hus2 ATP-dependent RecQ type DNA helicase; DEAD/DEAH box helicase; involved in meiotic recombination; involved in DNA repair; checkpoint-dependent DNA damage response during S phase; involved in the processing of stalled and collapsed replication forks; required for the maintenance of genome stability; human disease associated; mutants display reduced viability; mutants…
TI4896S000261	24/F04		-0.42	SPCC16C4.18c	taf50	transcription initiation factor TFIID subunit; histone H4-like TAF; interacts with the C-terminal WD repeat-containing region of Taf72p; essential; TAF(II) complex (TBP-associated protein complex); SAGA complex; involved in establishment and/or maintenance of chromatin architectur; involved in transcriptional activation
TI4896S000203	35/B08		-0.42	SPCC962.05		hypothetical protein; sequence orphan
TI4896S001521	20/E03		-0.42	SPBC83.14c	rfc5	replication factor C (activator 1 subunit); AAA family ATPase; activator of DNA polymerases
TI4896S004788	20/D03		-0.42	SPAC1B3.08		PINT/PCI domain (inferred from context); IQ domain (inferred from context)
TI4896S003904	29/B06		-0.42	SPAC1805.01c	SPAPJ736.02c	serine/threonine protein kinase
TI4896S002028	40/C12		-0.42	SPBC32F12.06	pch1	cyclin homolog; complexed with Cdk9p; not reciprocal best hit; functional homolog of Sc YLR226W
TI4896S001860	22/C10		-0.42	SPBC19G7.16		conserved hypothetical protein; predicted coiled-coil region
TI4896S003142	13/B07		-0.42	SPAC222.11		coproporphyrinogen III oxidase
TI4896S000859	15/F11		-0.42	SPCC965.06		potassium channel subunit ???; Aldo/keto reductase; no apparent Sc ortholog
TI4896S002283	38/F05		-0.42	SPBC3B8.11		hypothetical protein; sequence orphan
TI4896S004019	36/H02		-0.42	SPAC24C9.01	cut11; SPAC1786.03	spindle pole body docking protein; essential; 7 predicted transmembrane helices
TI4896S001084	20/B10		-0.42	SPBC1685.07c		amino acid transporter
TI4896S001464	33/A07		-0.42	SPBC17A3.07	pgr1; pi039	glutathione reductase; essential; maintains high levels of glutathione in the cytosol
TI4896S001770	36/C05		-0.42	SPBC17G9.03c		lysine-tRNA ligase; involved in lysyl-tRNA aminoacylation; lysine-tRNA ligase activity
TI4896S002656	28/C12		-0.42	SPBC16A3.13	meu7	alpha-amylas; large repeat insertion potential glycosylation sites; meiotic expression upregulated; possibly Sp specific; GPI anchored protein; glycoprotein; no apparent Sc ortholog
TI4896S001360	23/E07		-0.42	SPBC725.05c		nucleotide pyrophosphatase
TI4896S000816	28/C02		-0.42	SPCC830.03		eukaryotic conserved protein; Sc YLL035W is null lethal; Sc YLL035W is predicted to interact with LAS1; involved in cell growth; ATP/GTP-binding (prosite)
TI4896S002909	31/B01		-0.42	SPAC31A2.05c	mis4	adherin; sister chromatid cohesion molecule; chromatin associated; involved in S phase and spindle kinetochore attachment
TI4896S001097	35/C05		-0.42	SPBC649.05	cut12; stf1	links bipolar spindle formation to mitotic control; spindle pole body protein; essential; interacts physically with Plo1p (2-hybrid); activator of Plo1p; no apparent orthologs
TI4896S001365	04/F04		-0.41	SPBC725.10		similar to peripheral-type benzodiazepine receptor; no apparent Sc ortholog; non-essential
TI4896S000008	46/F06		-0.41	SPCC757.04		zinc finger protein; zf-fungal Zn(2)-Cys(6) binuclear cluster domain
TI4896S003020	39/A02		-0.41	SPAC22F3.13	tsc1	putative coiled coil protein hamartin-like protein; similar to human TSC1 (tuberous sclereosis 1); involved in vesicular transport; involved in cell growth arrest (implicated); predicted to interact with SPAC630.13c (tuberin); deletion mutant defective in nutrient uptake; deletion mutant defective in conjugation; involved in conjugation; involved in protein trafficking; no apparent Sc ortholog
TI4896S001898	35/E11		-0.41	SPBC12C2.03c		FAD binding; oxidoreductase
TI4896S002938	37/E10		-0.41	SPAC24H6.06		preinitiation complex component; involved in DNA replication (initiation); involved in Cdc45p loading onto chromatin; interacts physically with Cdc45p; interacts physically with MCM proteins; associates with the replication origin during G1-S phase; predicted coiled-coil region
TI4896S001603	33/A03		-0.41	SPBC18H10.04c	sce3	RNA-binding protein; rrm RNA recognition motif; suppressor of cdc11 septation defect
TI4896S001739	09/H10		-0.41	SPBC23G7.16	ctr6	copper transporter; induced under copper limiting conditions; regulated by Cuf1p
TI4896S004483	37/D12		-0.41	SPAC1F7.03		TRP-like ion channel; essential; DUF907; conserved fungal protein; 9 predicted transmembrane helices; predicted N-terminal signal sequence
TI4896S001014	35/B02		-0.41	SPBC1271.09		membrane transporter; involved in phospholipid transport; non-essential
TI4896S004678	01/F02	Lethal	-0.41	SPAC1834.03c	h4.1; hhf1	histone H4
TI4896S000885	51/D09		-0.41	SPCC70.06		SAC3/GANp family; involved in nuclear export; similar to Sp SPCC576.05
TI4896S001104	36/G06		-0.41	SPBC354.07c		oxysterol binding protein; involved in ergosterol biosynthesis; similar to Sp SPBC646.08c and SPBC1271.12 and SPCC23B6.01
TI4896S001708	20/A11		-0.41	SPBC29A3.03c		zinc finger protein; zf-C3HC4 type (RING finger); ubiquitin ligase (E3); LisH domain-suggested to function in microtubule dynamics; CLTH domain (inferred from context); involved in catabolite degradation; involved in vacuolar import and degradation
TI4896S000622	27/B04		-0.41	SPCC417.06c		serine/threonine protein kinase; similar to Sp SPAC24B11.11c (paralog)
TI4896S000417	18/G04		-0.41	SPCC4B3.07		conserved hypothetical; Sc YOR051C purifies as part of the nuclear pore complex
TI4896S003595	36/G05		-0.41	SPAC3C7.01c	SPAC732.03c	inositol polyphosphate phosphatase; similar to Sp SPBC19F5.03
TI4896S002474	29/C03		-0.41	SPBC21C3.14c		sequence orphan; hypothetical protein; serine-rich protein
TI4896S002673	39/F01		-0.41	SPBC543.05c		anion exchange family protein inorganic anion exchanger; H303-transporter family
TI4896S004100	28/H08		-0.41	SPAC6G10.09		mannosyl-oligosaccharide glucosidase; glycosyl hydrolase family 63
TI4896S001333	34/G11		-0.41	SPBC409.08		membrane transporter; unknown specificity
TI4896S000023	06/A09		-0.41	SPCC613.06	rpl902; rpl9-2	60S ribosomal protein L9
TI4896S001699	28/F03		-0.41	SPBP23A10.10		serine/threonine protein kinase
TI4896S000525	17/C08		-0.41	SPCC622.17	apn1	AP endonuclease; DNA (apurinic or apyrimidinic site) lyase, endonuclease; endonuclease IV family
TI4896S002729	49/B12		-0.41	SPBPB2B2.01		amino acid permease family; similar to Sp SPAP7G5.06 and SPAC869.11 and SPBC359.01 and SPBC359.01 and meu22 and isp5
TI4896S000590	19/D02		-0.41	SPCC777.07		glycosyl transferase family 15; similar to S. cerevisiae YOR099W and YKR061W and YJL139C and YDR483W and YBR205W and YBR199W and YPL053C; conserved fungal protein
TI4896S001813	38/C01		-0.41	SPBC16H5.12c		calcineurin-like phosphoesterase (Pfam); metallophosphatase (Pfam); no apparent orthologs
TI4896S000172	29/G04		-0.41	SPCC364.05	vps3	CNH domain; involved in intracellular protein transport
TI4896S002624	26/A04		-0.41	SPBC3F6.06c	SPBC342.01c	glycosyl transferase family ALG8
TI4896S001455	32/G11		-0.41	SPBC8D2.18c		adenosylhomocysteinase
TI4896S001305	14/C07		-0.41	SPBC1734.13	atp3	mitochondrial F1-ATPase (gamma subunit); ATP synthesis coupled proton transport
TI4896S001842	20/G03		-0.41	SPBC24C6.10c		conserved hypothetical protein
TI4896S000621	24/H12		-0.41	SPCC417.05c		Chs4 homologue; SEL1 repeat protein; involved in chitin biosynthesis; similar to Sp SPBC1289.01C and SPAC24B11.10C and SPBC3E7.12C
TI4896S000235	38/B09		-0.41	SPCC5E4.03c	taf72	transcription initiation factor TFIID subunit; TAF(II) complex (TBP-associated protein complex); SAGA complex; involved in establishment and/or maintenance of chromatin architecture; involved in transcriptional activation; essential; overexpression suppresses the anaphase blocking mutation cut9; possible role of WD repeat-containing TAFs in the expression of genes involved in progression through …
TI4896S004250	10/F01		-0.41	SPAC17G6.09	sec62	SRP receptor activity; involved in intracellular protein transport; involved in protein-ER targeting; involved in SRP-dependent cotranslational membrane targeting
TI4896S001298	18/D06		-0.41	SPBC1734.06	rhp18	zinc finger protein; zf-C3HC4 type (RING finger); ubiquitin ligase (E3); SAP domain; DNA-binding protein; involved in DNA repair; involved in post-replication repair; required for DNA damage responses throughout the cell cycle
TI4896S001275	21/F08		-0.41	SPBC146.12	coq6	putative coenzyme Q monooxygenase; involved in ubiquinone biosynthesis
TI4896S004512	20/E08		-0.41	SPAC2C4.15c		UBX domain
TI4896S002516	14/D11		-0.41	SPBC1604.04		MC transporter; carrier for the cofactor for thiamine pyrophosphate
TI4896S001999	23/G12		-0.41	SPBC18A7.02c		MFS transporter
TI4896S000392	28/H05		-0.41	SPCC1259.02c		conserved protein; peptidase family M20
TI4896S000926	45/F12		-0.41	SPBC359.03c		amino acid permease
TI4896S004015	27/G11		-0.41	SPAC1786.01c	SPAC31G5.20c	putative patatin-like phospholipase
TI4896S002987	20/F07		-0.40	SPAC3H8.02		sec14 cytosolic factor family
TI4896S000872	23/H04		-0.40	SPCC1494.03		hypothetical protein; sequence orphan
TI4896S000037	44/E07		-0.40	SPCC330.08	arg11; gmd3	putative glycosyl transferaseglycosyl transferase family 1; possibly involved in N-linked oligosacchadride synthesis; involved in glycosylation of acid phosphatase; functionally complements Sc ALG11
TI4896S000846	24/A08		-0.40	SPCC1840.04		metacaspase-like protein; cysteine protease
TI4896S002279	40/B06		-0.40	SPBC11C11.09c	rpl502; rpl5-2; rpl5b	60S ribosomal protein L5
TI4896S000201	26/A09		-0.40	SPCC962.03c	cut15	alpha-importin/karyopherin; serine rich RNA polymerase I suppressor; involved in mitosis; involved in chromosome condensation (required); armadillo repeat protein; similar to Sp SPBC1604.08C
TI4896S001483	50/E07		-0.40	SPBC32H8.02c	pi021; SPACTOKYO_453.14c	Ulp1 protease family
TI4896S004995	20/G12		-0.40	SPAC1039.07c		aminotransferase class-III pyridoxal-phosphate; 2,2-dialkylglycine decarboxylase; no apparent Sc ortholog
TI4896S004619	15/G11		-0.40	SPAC637.06		galactosyltransferase; alpha-1,2-galactosyltransferase; GMA12/MNN10 family; predicted N-terminal signal sequence; involved in galactosylation of cell surface glycoproteins; similar to Sp gmh1 and gmh3 and gmh2 and gma12 and SPAC5H10.13C and SPBC1289.13c and SPBC8D2.17 (paralogs)
TI4896S003938	36/G08		-0.40	SPAC3F10.13		UBA domain; involved in protein deubiquitination (implicated); ubiquitin-binding protein
TI4896S000251	20/B08		-0.40	SPCC16C4.08c	skb15	interacts physically with Shk1p; negative regulator of Shk1; WD repeat protein
TI4896S001940	17/F11		-0.40	SPBC2G5.01		conserved hypothetical; hypothetical protein
TI4896S003488	17/C03		-0.40	SPAC1002.08c		RNA polymerase specificity factor
TI4896S003159	48/G07		-0.40	SPAC955.01c	SPAC821.13c	P-type ATPase; P4 type; aminophospholipid translocase
TI4896S002971	26/E11		-0.40	SPAC2F7.08c		SWI/SNF global activator complex comoponent; involved in chromatin remodeling
TI4896S001955	36/H07		-0.40	SPBC25B2.09c		arginine-tRNA ligase
TI4896S000975	49/G01		-0.40	SPBC800.01	SPBC31E1.06	GTP-binding protein; involved in ribosome biogenesis and assembly; AAA family ATPase; involved in 18S rRNA biogenesis
TI4896S001786	21/A04		-0.40	SPBC14C8.05c	meu17	glucoamylase (glucan-alpha-1,4-glucosidase); glycosyl hydrolase family 15; sporulation-specific; meiotic expression upregulated
TI4896S000716	38/D08		-0.40	SPCC74.02c		hypothetical serine-rich protein; sequence orphan
TI4896S004387	46/B09		-0.40	SPAC2F3.15		putative cell division protein kinase; serine/threonine protein kinase
TI4896S000405	37/H10		-0.40	SPCC1259.14c	meu27; B8647-6	possibly Sp specific; Pfam_B_8647 domain; NLS; meiotic expression upregulated
TI4896S002463	46/E06		-0.40	SPBC21C3.03		hypothetical protein
TI4896S004747	20/H03		-0.40	SPAC4F10.08		hypothetical protein; sequence orphan
TI4896S004769	25/A12		-0.40	SPAC19B12.10		conserved hypothetical; similar to human amsh protein; MOV34 domain; no apparent Sc ortholog
TI4896S001579	36/C12		-0.40	SPBC2F12.12c		hypothetical protein; interacts with ankyrin repeat containing protein by similarity to D.melanogaster cactin; no apparent Sc ortholog; non-essential
TI4896S002991	20/C09		-0.40	SPAC3H8.06	aur1	inositol phosphorylceramide synthase; involved in aureobasidin A resistance; involved in cellular morphogenesis
TI4896S002315	38/B04		-0.40	SPBC2G2.06c	apl1	adaptin; AP-2 adaptor complex; involved in vesicle-mediated transport
TI4896S001885	47/C09		-0.40	SPBC21D10.06c		Sp specific families; glycoprotein; serine/threonine-rich; possibly Sp specific
TI4896S001522	25/B11		-0.40	SPBC83.15		WD repeat protein; involved in ribosome biogenesis and assembly
TI4896S001133	21/B06		-0.40	SPBC115.02c		ATPase (AFG1 family)
TI4896S001988	36/G10		-0.40	SPBC4F6.09		membrane transporter; siderochrome-iron transporter activity; involved in iron-siderochrome transport; involved in iron homeostasis; similar to Sp SPCC61.01C and SPAC1F8.03c
TI4896S001888	12/E09		-0.40	SPBC21D10.03c	SPBC12C2.12c	lactoylglutathione lyase
TI4896S001869	50/B01		-0.40	SPBP18G5.01	SPBC36B7.09	possibly involved in serine/threonine protein kinase; eukaryotic initiation factor 2 alpha (eIF2-alpha) kinase; involved in amino acid control response
TI4896S004417	20/F03		-0.39	SPAC19G12.08		fatty acid hydroxylase; involved in the hydroxylation of the very long chain fatty acid (VLCFA)
TI4896S004109	39/B07		-0.39	SPAC6G9.06c	pcp1	pericentrin; coiled coil protein; calmodulin binding; overexpression results in the formation of supernumerary SPB-like structures and disrupts both mitotic spindle assembly and chromosome segregation
TI4896S003467	28/F10		-0.39	SPAC17A5.06	ercc3sp	DEAD box helicase; involved in DNA repair; ERCC-3 complementing; putative TFIIH subunit; XP-B family; helicase C-terminal domain
TI4896S003130	22/G12		-0.39	SPAC1687.19c		queuine tRNA-ribosyltransferase; no apparent Sc ortholog
TI4896S000262	49/B09		-0.39	SPCPJ732.01	vps5	retromer complex; involved in intracellular protein transport; PX domain; phosphoinositide binding; involved in retrograde transport
TI4896S004674	20/H02		-0.39	SPAC144.17c		6-phosphofructo-2-kinase; fructose-2,6-bisphosphatase
TI4896S002144	40/G02		-0.39	SPBC13E7.10c	SPBC30D10.20	transcription factor TFIIIB complex; involved in transcription from Pol III promoter; TATA-dependentpathway; interacts physically with Sfc4p
TI4896S002475	25/C10		-0.39	SPBC21C3.15c		aldehyde-dehydrogenase-like
TI4896S004098	28/E10		-0.39	SPAC6G10.07		nuclear cap-binding complex
TI4896S000964	18/F12		-0.39	SPBC660.12c		peptide epimerase; no apparent Sc ortholog
TI4896S001852	23/D06		-0.39	SPBC19G7.08c		conserved hypothetical protein; arrestin family
TI4896S000936	35/H07		-0.39	SPBC1683.07		alpha-glucosidase; alpha-amylase
TI4896S003039	36/E09		-0.39	SPAPJ696.01c	vps17	retromer complex; involved in retrograde transport; PX domain; phosphoinositide binding; involved in intracellular protein transport
TI4896S001819	31/G11		-0.39	SPBC16H5.06	rip1	ubiquinol-cytochrome c reductase iron-sulfur subunit; functionally complements Sc RIP1
TI4896S000971	33/H08		-0.39	SPBC31E1.02c	pgak2	P-type calcium ATPase; P2 type
TI4896S002103	44/F09		-0.39	SPBC2D10.05	exg3	glucan 1,3-beta-glucosidase
TI4896S002492	46/H05		-0.39	SPBC211.02c	cwf3; syf1	similarity to drosophilla crooked neck protein; nineteen complex (Ntc) (putative); involved in mRNA splicing; complexed with Cdc5p
TI4896S001260	19/A10		-0.39	SPBP35G2.11c		conserved hypothetical; zinc finger protein; zf-ZZ type (3)
TI4896S002791	12/E07		-0.39	SPAC11D3.03c		conserved hypothetical protein; similar to D. melanogaster CG10208; no apparent Sc ortholog
TI4896S004531	25/C05		-0.39	SPAC27F1.08		Nramp manganese transporter
TI4896S004875	21/H07		-0.39	SPAC29A4.04c		TruB family; pseudouridylate synthase activity; PUA domain; involved in rRNA processing
TI4896S003030	47/G07		-0.39	SPAC22F3.03c		DEAD/DEAH box helicase; SNF2 family; helicase C-terminal domain; involved in DNA repair
TI4896S002273	41/A08		-0.39	SPBC11C11.04c	alp1	tubulin-folding cofactor d
TI4896S001222	50/E04		-0.39	SPBC713.09		hypothetical protein; sequence orphan; predicted coiled-coil
TI4896S000866	25/H05		-0.39	SPCC965.13		transporter; unknown specificity; unknown specificity; similar to Sp car1 (paralog)
TI4896S002305	40/F03		-0.39	SPBC4B4.08	ght2	hexose transporter; similar to Sp GHT1 and GHT3 and GHT4 and GHT5 and GHT6 and SPCC548.06C and SPBC1348.14C
TI4896S000345	22/H07		-0.39	SPCC24B10.08c		transcriptional adaptor; histone acetyltransferase complex; Myb family; zinc finger protein; zf-ZZ type
TI4896S001644	23/G08		-0.39	SPBC3H7.06c	pof9	F-box protein
TI4896S004841	27/C07		-0.39	SPAC2E12.01	SPAC22E12.19	Myb family; DNA binding protein; predicted coiled-coil region
TI4896S004630	26/A10		-0.39	SPAC12B10.03		conserved hypothetical; WD repeat protein; no apparent Sc ortholog
TI4896S004729	36/E05		-0.39	SPAC22F8.10c	sap145	U2 snRNP component; complexed with Cdc5p; involved in mRNA splicing
[truncated: 2,756 more rows]
