# Supplementary material for: Microarray-based target identification using drug hypersensitive fission yeast expressing ORFeome
Source: Royal Society of Chemistry journal article supplement (doi:10.1039/c0mb00326c), 2011-02-22
Supplement: c0mb00326c_s2.csv [file c0mb00326c_s2.csv]

Sequence ID	Gene_ID	Log2 (treatment/conteol)	Gene name1	Gene name2	Gene product
TI4896S002982	24/A02	3.22	SPAC13A11.02c	cyp51	probable cytochrome P450 51
TI4896S001304	35/G08	3.17	SPBC1734.12c		involved in cell wall biosynthesis
TI4896S000401	37/G02	3.07	SPCC1259.11c		TBC domain protein; GTPase activating protein of Rab-like GTPase; EF hand motif (context dependent)
TI4896S002671	39/F09	3.04	SPBC543.03c		putative DNA helicase DNA helicase; Ku domain protein; involved in DNA repair; involved in double-strand break repair; involved in telomere maintenance (required); involved in double-strand break repair via nonhomologous end-joining; involved in control of replication timing in telomeric regions; interacts physically with pku70p; forms a heterodimer with pku70p; DNA-binding protein; telomere bind…
TI4896S000195	48/D09	2.97	SPCP31B10.06		putative synaptic vesicle protein; C2 domain; similar to Sp SPCC962.01
TI4896S002839	29/D12	2.69	SPAC24B11.10c		Chs Four Homologue (pers. comm. Henar Montero); involved in chitin biosynthesis; SEL1 repeat protein; similar to Sp SPBC1289.01C and SPCC417.05C and SPBC3E7.12C
TI4896S003194	40/D03	2.69	SPAC1A6.09c	lag1	longevity-assurance protein 1; lipid sensing domain; involved in intracellular protein transport; involved in ceramide synthesis; similar to Sp SPBC3E7.15C; involved in ER to golgi transport; involved in GPI-anchored protein transport
TI4896S000417	18/G04	2.63	SPCC4B3.07		conserved hypothetical; Sc YOR051C purifies as part of the nuclear pore complex
TI4896S001440	31/H03	2.56	SPBC8D2.02c		fungal conserved protein
TI4896S001376	17/F07	2.53	SPBC651.03c		TBC domain protein; GTPase activating protein of Rab-like GTPase; non-essential (pers. comm. Kathy Gould); involved in secretory pathway (IGI) (pers. comm. Kathy Gould); no apparent Sc ortholog
TI4896S004582	08/B04	2.52	SPAC9E9.14	vps24	SNF7 family; involved in intracellular protein transport; involved in secretory pathway; class E vps; involved in endosomal maturation
TI4896S003705	22/H12	2.49	SPAC13G7.10		Myb family; DNA binding protein
TI4896S000679	18/B08	2.41	SPCC285.10c		conserved hypothetical; hypothetical protein; SPRY domain
TI4896S003708	25/F08	2.40	SPAC6C3.01c	SPAC13G7.13c	involved in sporulation; involved in spindle formation (meiotic); rrm RNA recognition motif (2); RNA-binding protein
TI4896S004310	52/B05	2.39	SPAP7G5.06		amino acid permease family; similar to Sp SPAC869.11 and SPBC359.01 and meu22 and SPBPB2B2.01 and isp5
TI4896S002657	26/A11	2.37	SPBC16A3.12c		triglyceride lipase-cholesterol esterase; similar to Sp SPCC1672.09
TI4896S003655	40/F06	2.37	SPAC1783.07c	pap1	ap-1-like transcription factor; bZIP (basic leucine zipper) transcription factor family; stress induced transcription factor; involved in oxidative stress response (required)
TI4896S003499	19/B08	2.35	SPAC1002.18		conserved hypothetical; fungal conserved protein (Gaillardin et al); similar to N. crassa 3H10.120; no apparent Sc ortholog
TI4896S000985	30/D08	2.35	SPBC800.10c		actin cortical patch component; involved in endocytosis; predicted coiled-coil region; EF hand motifs; similar to Sp SPBC83.01 and SPAC25G10.09C
TI4896S001060	43/E01	2.34	SPBC428.09c		removed from GeneDB
TI4896S003402	29/E04	2.22	SPAP27G11.05c	vps41	WD repeat protein; involved in intracellular protein transport; involved in vacuole fusion
TI4896S002319	43/C03	2.21	SPBC2G2.10c		sequence orphan; hypothetical protein
TI4896S004402	18/E06	2.21	SPAC27E2.07		glycosyltransferase; involved in cell wall biosynthesis; deletion mutant galactomannans deficient for pyruvylated galactose-beta-1,3-galactose-alpha-1,2-pyruvylgalactose (PvGal) (pers. comm. Robert Trimble); no apparent orthologs
TI4896S001999	23/G12	2.19	SPBC18A7.02c		MFS transporter
TI4896S000949	25/D12	2.18	SPBC1198.07c		glycosylhydrolase; involved in cellular elongation; tandem duplication
TI4896S001836	34/F02	2.17	SPBC24C6.04		delta-1-pyrroline-5-carboxylate dehydrogenase
TI4896S004541	22/D12	2.14	SPAC23D3.09		actin-related protein
TI4896S004964	30/G04	2.14	SPAC3G6.01	hrp3	helicase C-terminal domain; DEAD/DEAH box helicase; chromodomain protein; involved in heterochromatin silencing
TI4896S004115	26/C05	2.14	SPAC6G9.12		BRCT domain; fibronectin type III domain; involved in chitin biosynthesis; involved in conjugation; involved conjugation with cellular fusion
TI4896S003035	24/G01	2.14	SPAC1296.03c	sxa2	serine carboxypeptidase; involved in conjugationdegrades extracellular P-factor; no apparent Sc ortholog
TI4896S003780	36/G01	2.13	SPAC19A8.05c	vps27	zinc finger protein; zf-FYVE type; involved in Golgi-vacuole transport; complexed with SPBC1734.08; sorting receptor for ubiquitinated membrane proteins (ISS); involved in protyolysis
TI4896S000812	45/H04	2.12	SPCC1620.12c		RabGAP domain; TBC domain protein; GTPase activating protein of Rab-like GTPase; similar to Sp SPAC26F1.09 (paralog)
TI4896S000451	38/G02	2.11	SPCC645.08c		RNA-binding protein; tudor domain; p100 co-activator ortholog; TFIIE-interacting; no apparent Sc ortholog
TI4896S001975	27/C05	2.09	SPBC3E7.09		conserved hypothetical protein
TI4896S003976	25/B09	2.09	SPAC2E1P3.02c		ammonium transporter
TI4896S001697	22/F05	2.05	SPBP23A10.08		actin-related protein
TI4896S000550	36/B09	2.05	SPCC584.08	cwf13; snw1; SPCC188.11	SNW family; chromatin binding; complexed with Cdc5p; involved in mRNA splicing; SKIP/SNW domain; interacts with the small subunit of U2AF
TI4896S002964	17/D06	2.04	SPAC227.18	lys3; SPAC2F7.01	saccharopine dehydrogenase [NAD+, L-lysine forming]
TI4896S004883	30/A05	2.03	SPAC26F1.09		GTPase activating protein predicted; target Rab-like GTPase predicted; TBC domain protein; similar to S. pombe SPCC1620.12
TI4896S001166	32/E01	2.02	SPBC119.11c	pac1; hcs	double-strand-specific ribonuclease; overexpression inhibits sexual development
TI4896S002178	29/A07	2.02	SPBC4C3.06		conserved hypothetical; hypothetical protein; FCH domain
TI4896S004269	26/H07	2.00	SPAC8C9.04		sequence orphan; hypothetical protein
TI4896S005018	16/H02	2.00	SPAC186.03		L-asparaginase; similar to Sp SPAC977.12 and SPBPB8B6.05c and SPBPB21E7.09
TI4896S001842	20/G03	1.99	SPBC24C6.10c		conserved hypothetical protein
TI4896S002586	33/A09	1.99	SPBC56F2.11	met6	homoserine o-acetyltransferase
TI4896S002835	16/A05	1.98	SPAC24B11.06c	spc1; sty1; phh1	serine/threonine protein kinase; Spc1 SAPK cascade; interacts physically with SPBC9B6.10; MAP kinase (MAPK); acts downstream of 2 component response regulator; involved in mitotic checkpoint; involved in spindle orientation; involved in oxidative stress response
TI4896S002890	33/C01	1.97	SPAC630.03	act2	ARP2/3 actin-organizing complex; involved in actin cortical patch assembly; actin-like protein; essential; involved in cell polarity; involved in endocytosis; actin cortical patch component; interacts genetically with Cdc3p; essential
TI4896S001378	10/E05	1.96	SPBC651.05c		ELL complex; RNA polymerase II transcription factor; similar to human EAP30; involved in glucose derepression
TI4896S003135	02/C07	1.95	SPAC222.04c		hypothetical protein
TI4896S002111	24/E07	1.95	SPBC2D10.13	est1	TPR repeat protein; EST1 domain; involved in telomere maintenance; involved in telomerase-dependent telomere maintenance; involved in telomerase regulation; involved in transcriptional silencing; similar to Sp SPBC2F12.03c
TI4896S000352	21/E03	1.95	SPCC24B10.15		hypothetical protein
TI4896S003887	31/B08	1.90	SPAC6F6.01		VIC sodium channel
TI4896S003864	11/G06	1.90	SPAC644.03c	SPAC4F8.01	involved in intracellular protein transport; SNF7 family; class E vps; predicted coiled-coil
TI4896S001807	37/D10	1.89	SPBC21H7.04		DEAD/DEAH box helicase; ATP-dependent; RNA helicase
TI4896S004027	36/D03	1.89	SPAC24C9.08		gly x carboxypeptidase activity; peptidase family M20
TI4896S002654	33/A08	1.89	SPBC16A3.15c	nda2	tubulin alpha-1 chain
TI4896S000149	35/G03	1.88	SPCC306.09c	cap1; cap	actin cortical patch component; adenylyl cyclase-associated protein
TI4896S000938	35/C11	1.87	SPBC1683.09c	frp1	ferric reductase transmembrane component; similar to Sp SPBC947.05C
TI4896S004512	20/E08	1.87	SPAC2C4.15c		UBX domain
TI4896S001759	21/D12	1.87	SPBC1711.08		stress-regulated co-chaperone; activator of Hsp90p; interacts physically with Swo1p; conserved eukaryotic protein
TI4896S003020	39/A02	1.86	SPAC22F3.13	tsc1	putative coiled coil protein hamartin-like protein; similar to human TSC1 (tuberous sclereosis 1); involved in vesicular transport; involved in cell growth arrest (implicated); predicted to interact with SPAC630.13c (tuberin); deletion mutant defective in nutrient uptake; deletion mutant defective in conjugation; involved in conjugation; involved in protein trafficking; no apparent Sc ortholog
TI4896S001874	33/D08	1.86	SPBC1921.03c	mex67	involved in mRNA export; interacts physically with Rae1p
TI4896S001717	39/H11	1.85	SPBC29A3.12	rps902; rps9-2; rps9b	40S ribosomal protein S9-B
TI4896S003181	20/D06	1.83	SPAC23C4.16c		lipase; lipase 3 domain
TI4896S002165	22/G10	1.83	SPBC1778.03c		NADH pyrophosphatase; Nudix family hydrolase; involved in NADH metabolism
TI4896S002622	29/C09	1.83	SPBC3F6.04c		ribonucleoprotein (RNP) complex; processome component; involved in rRNA processing; conserved eukaryotic protein; involved in ribosome biogenesis and assembly
TI4896S003978	37/E06	1.82	SPAC2E1P3.04		copper amine oxidase; no apparent Sc ortholog
TI4896S002821	28/B09	1.82	SPAC13G6.03		involved in glycosylphospatidylinositol modification; phosphoethanolamine N-methyltransferase activity
TI4896S002862	20/H05	1.81	SPAC1F5.03c		oxidoreductase; similar to D-amino-acid oxidases
TI4896S000933	29/A09	1.80	SPBC1683.04		beta-glucosidase activity; glycosyl hydrolase family 3; no apparent Sc ortholog
TI4896S003233	22/B04	1.79	SPAC22A12.10		aminoalcoholphosphotransferase; involved in phosphatidylethanolamine biosynthesis
TI4896S002284	22/A04	1.78	SPBC3B8.10c		protein phosphatase; involved in stress response; NLI interacting factor family
TI4896S000874	47/E09	1.77	SPCC1494.05c	ubp12	ubiquitin C-terminal hydrolase activity; involved in protein deubiquitination; involved in proteolysis (regulation) (supression); similar to Sp SPCC16A11.12c
TI4896S001617	51/C01	1.76	SPBC18H10.18c		hypothetical protein; sequence orphan; recent duplication; similar to Sp SPCC1682.06
TI4896S002865	27/G06	1.76	SPAC18B11.10	tup11	transcriptional repressor; histone binding; glucose repression regulatory protein; WD repeat protein
TI4896S002452	35/F08	1.75	SPBC31F10.10c		zinc finger protein; zf-MYND type; involved in cell polarity (regulation)
TI4896S001225	50/F06	1.75	SPBC713.12		squalene epoxidase; involved in ergosterol biosynthesis
TI4896S000763	29/G07	1.74	SPCC1739.14	npp106; SPCC1739.14	nuclear pore complex; involved in nuclear import; involved in nuclear export; involved in nuclear export of the small ribosomal subunit; interacts physically with Rae1p (in mRNA export); similar to Sp SPCC1739.14 (1others)
TI4896S003207	38/C09	1.73	SPAC30D11.03		DEAD/DEAH box helicase; helicase C-terminal domain; involved in 35S transcript processing; ATP-dependent; RNA helicase
TI4896S004203	12/D06	1.72	SPAC328.07c		involved in metal homeostasis
TI4896S003789	28/C01	1.72	SPAC23H3.06	apl6	AP-3 complex; adaptin; involved in vesicle-mediated transport
TI4896S001838	32/F08	1.71	SPBC24C6.06	gpa1	guanine nucleotide-binding protein (alpha-1 subunit); non-essential; involved in conjugation, sporulation
TI4896S003490	36/C02	1.70	SPAC1002.10c		eukaryotic conserved protein; no apparent Sc ortholog
TI4896S002805	24/B10	1.70	SPAC11D3.18c		membrane transporter; unknown specificity; similar to Sp SPAC1039.04 and SPAC1683.12 and SPAC1002.16C
TI4896S003397	36/B12	1.69	SPAC23H4.02		serine/threonine protein kinase; similar to Sp SPCC74.03C (paralog)
TI4896S001607	44/C04	1.69	SPBC18H10.08c	ubp4	ubiquitin C-terminal hydrolase activity
TI4896S002892	38/A11	1.68	SPAC630.05		TBC domain protein; GTPase activating protein of Rab-like GTPase
TI4896S003743	43/A09	1.68	SPAC15F9.01c		sequence orphan; hypothetical protein
TI4896S002247	20/G05	1.68	SPBC20F10.03		conserved eukaryotic protein; developmental regulator-like; involved in signal transduction; no apparent Sc ortholog; non-essential
TI4896S002364	33/B11	1.67	SPBC887.10	mcs4	mitotic catastrophe suppressor; response regulator receiver domain; involved in stress response; involved in cell cycle regulation; Wik1-Wis1-Spc1 kinase cascade
TI4896S002678	31/G05	1.66	SPBC543.10		predicted coiled-coil protein; similar to human congenital heart disease 5 protein chd5
TI4896S001515	24/C09	1.66	SPBC83.08		AAA family ATPase; chromatin remodeling complex; involved in chromatin remodeling; (old->putative tata binding protein-interacting)
TI4896S001371	40/G10	1.66	SPBC725.16	sct1; res1	DSC1/MBF trancription factor complex; partner of Cdc10p transcription factor; ankyrin repeat protein; APSES domain; DNA-binding protein; regulator of mitotic cell cycle (positive); Mlu1-box binding factor (MBF); involved in transcriptional activation; involved in control of start (required); involved in control of mitosis; similar to Sp SPBC336.12c and SPAC22F3.09c
TI4896S000601	09/H12	1.66	SPCC663.02	wtf14; wtf15	wtf element
TI4896S005030	52/E01	1.65	SPAC750.06c		S. pombe specific families
TI4896S000647	51/F04	1.64	SPCC1450.08c	wtf16; wtf8	wtf element
TI4896S002891	04/H01	1.64	SPAC630.04c		hypothetical protein
TI4896S000060	39/D02	1.64	SPCC1235.05c		helicase with SNF2 domain DEAD/DEAH box helicase; SNF2 family; helicase C-terminal domain; involved in UV protection; paralog?
TI4896S003299	19/D07	1.64	SPAC57A10.01	pas1; SPAC19E9.03	Pcl-like cyclin; involved in start control point of mitotic cell cycle; activator of the Res2p-Cdc10p transcriptional factor complex
TI4896S003091	38/G04	1.64	SPAC521.04c		calcium permease
TI4896S004547	34/B10	1.63	SPAC1527.01	mok11; SPAC23D3.15	a-1,3-glucan synthase; alpha glucan synthase; glycosyl transferase family 1; similar to Sp MOK1 and MOK12 and MOK13 and MOK14; involved in cell wall biosynthesis; no apparent Sc ortholog
TI4896S002851	19/F03	1.63	SPAC1639.01c	SPAC806.09c	GNS1/SUR4 family protein; involved in membrane lipid metabolism; similar to Sp SPAC1B2.03c
TI4896S000889	04/C08	1.63	SPCC70.10		Sp specific families; glycoprotein; confirmed by mRNA
TI4896S001952	16/B12	1.62	SPBC25B2.06c		conserved hypothetical protein; POZ domain
TI4896S004698	24/F02	1.62	SPAPYUG7.01	tfa1; SPAC458.07	transcription initiation factor TFIIE (alpha subunit)
TI4896S004992	24/G02	1.62	SPAC1039.04		membrane transporter; unknown specificity; similar to Sp SPAC11D3.18C and SPAC1683.12 and SPAC1002.16C
TI4896S004603	28/B02	1.62	SPAC27D7.02c		eukaryotic conserved protein; involved in intracellular protein transport; predicted coiled-coil protein; GRIP domain; possibly targetted to golgi
TI4896S004307	37/F02	1.62	SPAP7G5.03		conserved fungal protein; transmembrane helices
TI4896S000333	47/C02	1.62	SPCC16A11.12c	ubp1	ubiquitin C-terminal hydrolase activity
TI4896S002661	18/H01	1.61	SPBC16A3.08c		suppressor protein; specific affinity for guanine-rich quadruplex nucleic acids
TI4896S004841	27/C07	1.61	SPAC2E12.01	SPAC22E12.19	Myb family; DNA binding protein; predicted coiled-coil region
TI4896S001274	14/H06	1.60	SPBC146.11c		sequence orphan; hypothetical protein
TI4896S000228	12/H01	1.60	SPCC31H12.02c		putative ion channel; conserved protein; similar to heat shock protein
TI4896S003638	18/D05	1.60	SPAC23C11.14	zhf1; zhf	CDF metal cation transporter; involved in metal homeostasis; involved in zinc homeostasis; involved in cadmium homeostasis (independent of the phytochelatin detoxification pathway); involved in cobalt homeostasis; histidine rich cytoplasmic loop
TI4896S001951	32/C01	1.60	SPBC25B2.05	mis3	RNA-binding protein; KH domain; involved in ribosome biogenesis and assembly
TI4896S001976	22/E12	1.58	SPBC3E7.10		methionine aminopeptidase
TI4896S000718	35/A11	1.57	SPCC74.04		amino acid permease family; similar to Sp SPBC15C4.04C and SPAPB24D3.02C and SPAC1039.01 and SPAC11D3.08C and SPCC584.13 and SPAC9.10 and SPCC794.03
TI4896S002587	17/F09	1.57	SPBC56F2.10c		dolichyl-phosphate beta-glucosyltransferase
TI4896S002934	17/D05	1.56	SPAC24H6.10c		phospho-2-dehydro-3-deoxyheptonate aldolase; shikimate pathway (1st step)
TI4896S000216	20/F01	1.55	SPCC1672.12c		eukaryotic conserved protein
TI4896S004401	25/H08	1.55	SPAC27E2.06c		methionine-tRNA ligase; involved in methionyl-tRNA aminoacylation; methionine-tRNA ligase activity
TI4896S004054	49/F09	1.55	SPAC688.01	SPAC589.12	hypothetical protein; involved in sensitivity to certain drugs
TI4896S001157	32/A10	1.54	SPBC119.02	ubc4	ubiquitin conjugating enzyme; involved in mitotic transition, the protein ubiquitination of Cdc13p, ubiquitin chain elongation
TI4896S001781	32/H02	1.54	SPBC1815.01	eno1	enolase; similar to Sp eno102 (paralog)
TI4896S001906	44/D08	1.54	SPBC557.05		hypothetical protein; arrestin family
TI4896S002089	37/A05	1.54	SPBC1703.15c	vps33; SPBC2A9.01c	sec1 family; involved in vacuolar biogenesis (required); SNARE binding activity; SNARE docking complex (TRAPP?); involved in non-selective vesicle docking; syntaxin binding protein; involved in intracellular protein transport; involved in secretory pathway; involved in exocytosis; involved in non-selective vesicle docking; involved in ER to Golgi transport; involved in vacuole fusion
TI4896S003892	30/E03	1.54	SPAC6F6.06c		involved in cell polarity
TI4896S002327	33/G07	1.54	SPBC2G2.18	pop1; SPBC1718.01	F-box protein; WD repeat protein; involved in proteolysis and peptidolysis; forms hetero-and homo-complexes together with cullin-1 in SCF (Skp1-Cullin-1-F-box) ubiquitin ligase; complexed with Cdc18p; involved in the ubiquitin mediated degradation of Cdc18p; involved in the ubiquitin mediated degradation of Cdc1p; involved in the ubiquitin mediated degradation of Rum1p
TI4896S004822	04/B08	1.54	SPAC890.08	rpl31	60S ribosomal protein L31
TI4896S004938	42/H08	1.54	SPAP8A3.02c		conserved protein; 2 OG-Fe(II) oxygenase superfamily; no apparent Sc ortholog
TI4896S001840	17/D02	1.54	SPBC24C6.08c		sequence orphan; hypothetical protein
TI4896S004426	22/D11	1.53	SPAC23A1.02c		calcineurin-like phosphoesterase
TI4896S000655	25/A07	1.53	SPCC1450.16c		phospholipase; triacylglycerol lipase; patatin domain
TI4896S004365	19/C07	1.52	SPAC323.01c		NAD/NADH kinase; ATP dependent; involved in nicotinamide metabolism
TI4896S002038	41/A12	1.52	SPBC19C7.03	cyr1; git2	adenylate cyclase
TI4896S000227	29/H05	1.52	SPCC1183.11	SPCC31H12.01	MS ion channel; EF hand motif; no apparent Sc ortholog; similar to Sp SPAC2C4.17C (paralog)
TI4896S004727	29/D08	1.52	SPAC22F8.08	sec24	SEC23/SEC24 family; SEC24 subfamily; COPII-coated vesicle component; involved in intracellular protein transport; involved in ER to Golgi transport
TI4896S004770	03/F06	1.51	SPAC19B12.11c		similar to zinc finger protein; zf-C2H2 type
TI4896S003179	23/H11	1.51	SPAC23C4.14		beta-mannosyltransferase; involved in N-glycosylation
TI4896S003950	43/H12	1.50	SPAC8F11.08c		involved in lipase/lipid metabolism; conserved residues by multilple alignment
TI4896S003907	25/A04	1.50	SPAC1805.03c		conserved hypothetical; eukaryotic conserved protein
TI4896S004111	21/G02	1.50	SPAC6G9.08	ubp6	ubiquitin family protein; ubiquitin C-terminal hydrolase activity
TI4896S003640	27/F06	1.50	SPAC23C11.16	plo1	Polo kinase Plo1; essential; serine/threonine protein kinase; involved in spindle formation, contractile ring assembly, contractile ring positioning, septation; functional homolog of Sc CDC5; interacts physically with Cut12p; stress response pathway signalling (SRP), mediated phosphorylation of Ser402 regulates the timing of commitment to mitosis; stress response pathway signalling (SRP), mediate…
TI4896S002824	29/H09	1.50	SPAC13G6.06c		glycine dehydrogenase (decarboxylating); involved in glycine metabolism; glycine dehydrogenase (decarboxylating) activity
TI4896S000490	38/A07	1.49	SPCC338.13		Golgi transport complex; involved in intracellular protein transport; PPR domains (inferred from context); involved in secretory pathway; involved in ER to Golgi transport; conserved eukaryotic protein
TI4896S002143	14/B09	1.49	SPBC13E7.09		verprolin; proline-rich protein; involved in actin cytoskeletal organization; actin cortical patch component; Wiskott-Aldrich homolog; involved in endocytosis
TI4896S000213	25/G03	1.48	SPCC1672.09		triglyceride lipase-cholesterol esterase; similar to Sp SPBC16A3.12C
TI4896S001449	32/G10	1.48	SPBC8D2.12c	pi053	conserved protein; involved in mitochondrial protein synthesis
TI4896S002321	25/H06	1.48	SPBC2G2.12		histidine-tRNA ligase; involved in histidyl-tRNA aminoacylation; histidine-tRNA ligase activity
TI4896S000952	23/F09	1.48	SPBC1198.10c		asparagine-tRNA ligase; involved in asparaginyl-tRNA aminoacylation; asparagine-tRNA ligase activity
TI4896S001337	08/A05	1.48	SPBC409.12c		hypothetical protein
TI4896S001004	36/D02	1.48	SPBC1773.16c		transcriptional regulator; zinc finger protein; zf-fungal Zn(2)-Cys(6) binuclear cluster domain
TI4896S000614	37/F04	1.47	SPCC663.14c		hypothetical protein; similar to Sp SPAC1F7.03
TI4896S001929	51/C08	1.47	SPBC29A10.06c		hypothetical protein; sequence orphan
TI4896S004581	09/D02	1.47	SPAC9E9.13	wos2	p23 homolog; Hsp associated co-chaperone; interacts physically with Hsp90p; involved in mitotic control; interacts with Wee1p; interacts physically with Cdc2p; 3' UTR directs the formation multiple mRNAs; alternative polyadenylation sites results in the production of the 3 differently sized transcripts; alternative transcripts
TI4896S001511	04/D07	1.47	SPBC83.04	apc15	anaphase-promoting complex (APC); no apparent orthologs
TI4896S004823	18/F06	1.47	SPAC22E12.01	SPAC890.09	triose phosphate transporter
TI4896S000477	01/H10	1.47	SPCC1322.15	rpl3402; rpl34-2	60S ribosomal protein L34
TI4896S002707	40/B10	1.47	SPBC1289.03c	spi1	small GTPase; Ras family; GTP-binding protein; involved in mitosis (required); involved in interphase transition (required); involved in nuclear-cytoplasmic transport; involved in cell cycle progression; involved in DNA replication; involved in chromosome segregation; overexpression rescues pim1 mutant; deletion mutant results in genome instability; interacts physically with Pim1p; interacts phys…
TI4896S002434	27/H12	1.47	SPBC13G1.05		conserved eukaryotic protein
TI4896S001164	05/G10	1.46	SPBC119.09c		hypothetical protein
TI4896S003172	06/G03	1.46	SPAC23C4.07		hypothetical protein; sequence orphan
TI4896S003728	36/F09	1.46	SPAC17G8.12		hypothetical protein; sequence orphan
TI4896S000159	28/G12	1.45	SPCC4G3.12c		zf-C3HC4 type (RING finger); Ub ligase (E3); no Sc ortholog; possibly LIM domain interacting by similarity to mouse RNF12; serine-rich protein
TI4896S002193	45/C07	1.45	SPBC609.04		MFS multidrug efflux transporter; similar to Sp SPAC17C9.16c
TI4896S003837	34/F12	1.45	SPAC7D4.14c		sequence orphan; hypothetical protein; serine/proline-rich protein
TI4896S004851	32/F01	1.44	SPAC1006.07	tif1	translation initiation factor (4a subunit); DEAD/DEAH box helicase; helicase C-terminal domain; similar to Sp tif412
TI4896S003733	17/C09	1.43	SPAC22H10.04		serine/threonine protein phosphatase; PPP family; related to PP2A phosphatases; involved in glycogen accumulation
TI4896S001247	21/B03	1.43	SPBC646.15c		hypothetical protein; sequence orphan
TI4896S002969	24/F07	1.42	SPAC2F7.06c		DNA polymerase X family; involved in DNA repair; involved in double-strand break repair
TI4896S001539	31/E03	1.42	SPBC28F2.03	ppi1; cpy2	cyclophilin; peptidyl-prolyl cis-trans isomerase
TI4896S004063	30/C09	1.42	SPAC688.11		actin cortical patch component; ENTH domain protein; actin-binding protein; involved in actin cytoskeletal organization, cell polarity, endocytosis
TI4896S003859	03/G09	1.42	SPAC4F8.06		mitochondrial ribosomal protein S12
TI4896S000821	10/C03	1.42	SPCC830.08c		hypothetical protein
TI4896S002068	39/A08	1.41	SPBP4H10.15		aconitate hydratase aconitate hydratase; involved in tricarboxylic acid cycle; involved in citrate metabolism; aconitate hydratase activity
TI4896S001417	31/C02	1.41	SPBC27B12.10c		mitochondrial outer membrane translocase complex; involved in mitochondrial outer membrane protein import; mitochondrial import receptor
TI4896S001171	19/F09	1.41	SPBC119.15		conserved hypothetical; ATP-binding protein
TI4896S004616	10/C11	1.41	SPAC637.03		hypothetical protein; sequence orphan
TI4896S004769	25/A12	1.41	SPAC19B12.10		conserved hypothetical; similar to human amsh protein; MOV34 domain; no apparent Sc ortholog
TI4896S002789	01/B06	1.41	SPAC11D3.01c		fungal specific; similar to Nc DUF338; possibly involved in sporulation, cell wall synthesis; no apparent Sc ortholog
TI4896S002781	45/E06	1.41	SPAC1F8.01	ght3	hexose transporter; similar to Sp GHT1 and GHT2 and GHT4 and GHT5 and GHT6 and SPCC548.06C and SPBC1348.14C
TI4896S002995	18/E01	1.40	SPAC3H8.10	spo20; sec14	CRAL/TRIO domain; required for transport of secretory proteins from the Golgi complex; Catalyzes the transfer of phosphatidylinositol and phosphatidylcholine between membranes in vitro; essential for viability and secretion;has a direct role in controlling cell septation and in forespore membrane formation
TI4896S004818	35/B12	1.40	SPAC890.04c		WD repeat protein; Sc YTM1 is a microtubule-associated protein
TI4896S003049	34/G08	1.40	SPAC22G7.08		serine/threonine protein kinase; similar to Sp SPAC1020.10
TI4896S000603	30/F04	1.40	SPCC663.03	pmd1	ABC transporter family; leptomycin efflux transporter; homologous mammalian P-glycoprotein
TI4896S004491	29/A06	1.39	SPAC1F7.11c		transcriptional regulator; zinc finger protein; zf-fungal Zn(2)-Cys(6) binuclear cluster domain; similar to Sp SPAC139.03 and SPBC16G5.16 and SPAC3C7.04 (paralogs)
TI4896S000715	46/F05	1.39	SPCC74.01	sly1	sec1 family; SNARE binding activity; SNARE docking complex (TRAPP?); involved in non-selective vesicle docking; syntaxin binding protein; involved in intracellular protein transport; involved in secretory pathway; involved in exocytosis; involved in non-selective vesicle docking; involved in ER to golgi transport; interacts physically with Sed5p
TI4896S005022	14/F05	1.39	SPAC186.07c		2-hydroxyacid dehydrogenase; D isomer specific; no apparent Sc ortholog; similar to Sp SPAC186.02C
TI4896S000815	22/F03	1.39	SPCC830.02	wtf24; wtf10-pseudo	wtf element
TI4896S000866	25/H05	1.39	SPCC965.13		transporter; unknown specificity; unknown specificity; similar to Sp car1 (paralog)
TI4896S003346	36/C04	1.38	SPAC9.10		amino acid permease family; similar to Sp SPBC15C4.04C and SPAPB24D3.02C and SPCC74.04 and SPAC1039.01 and SPAC11D3.08C and SPCC584.13 and SPCC794.03
TI4896S000150	51/D12	1.38	SPCC306.10	wtf8; wtf3-pseudo	wtf element Wtf8
TI4896S001933	51/F01	1.38	SPBC29A10.10c		tRNA-splicing endonuclease positive effector
TI4896S004829	18/C11	1.38	SPAC22E12.07	rna1	Ran GTPase activating protein (RanGAP); leucine-rich repeat protein; functionally complements Sc RNA; involved in mRNA processing
TI4896S000651	47/E02	1.37	SPCC1450.12		sorting nexin; involved in intracellular protein transport; PX domain; phosphoinositide binding
TI4896S001249	35/F04	1.37	SPBC855.01c	SPBC646.17c; SPBP35G2.01c	WD repeat protein; no apparent Sc ortholog; non-essential
TI4896S003935	17/B12	1.36	SPAC3F10.10c	map3	pheromone M-factor receptor; involved in meiosis (initiation); G-protein coupled receptor
TI4896S000557	28/E08	1.36	SPCC584.15c		conserved protein; calcium binding protein
TI4896S000177	52/B10	1.36	SPCC970.11c	wtf9; wtf2	wtf element Wtf9
TI4896S003349	10/D05	1.36	SPAPJ735.01c	cwf16; SPAC9.13c	eukaryotic conserved protein; involved in mRNA splicing; interacts physically with Cdc5p; interacts with other cwf proteins; involved in cell cycle control
TI4896S001467	32/B11	1.36	SPBC17A3.10	pi036	zinc finger protein; zf-C3HC4 type (RING finger); ubiquitin ligase (E3); involved in peroxisome assembly
TI4896S004921	08/D12	1.35	SPAC2H10.02c		PDZ domain protein; similar to 26s proteasome regulatory subunit p27
TI4896S001365	04/F04	1.35	SPBC725.10		similar to peripheral-type benzodiazepine receptor; no apparent Sc ortholog; non-essential
TI4896S004531	25/C05	1.34	SPAC27F1.08		Nramp manganese transporter
TI4896S001994	32/C03	1.34	SPBC4F6.15c	swi10	endonuclease complex subunit; helix-hairpin-helix; involved in mating-type determination, mismatch repair, nucleotide-excision repair, DNA repair, strand incision
TI4896S001295	37/C06	1.34	SPBC1734.03	SPBC337.19	dihydropteroate synthase; 2-amino-4-hydroxy-6-hydroxymethyldihydropteridine diphosphokinase; 7, 8-dihydro-6-hydroxymethylpterin-pyrophosphokinase; HPPK; dihydroneopterin aldolase; trifunctional enzyme; involved in folate biosynthesis (1st step) (2nd step)
TI4896S001439	33/D04	1.34	SPBC8D2.01	gsk31; pi064	serine/threonine protein kinase; glycogen synthase kinase 3 (GSK-3) family; similar to Sp gsk3
TI4896S003203	16/D03	1.33	SPAC30D11.07	nth1	DNA N-glycosylase activity; DNA-(apurinic or apyrimidinic site) lyase activity; involved in DNA repair; involved in nucleotide-excision repair; involved in base-excision repair; deletion mutant sensitive to MMS
TI4896S003047	34/C07	1.33	SPAC22G7.06c	ura1	ATP-binding protein; involved in glutamate metabolism; involved in pyrimidine base biosynthesis; involved in aspartate metabolism; carbamoyl-phosphate synthase (glutamine hydrolyzing) activity; aspartate carbamoyltransferase activity; transferase activity, transferring pentosyl groups; dihydroorotase activity
TI4896S000101	26/D12	1.33	SPCC553.04	cyp9	cyclophilin; peptidyl-prolyl cis-trans isomerase; no apparent Sc ortholog
TI4896S004937	04/A11	1.33	SPAP8A3.01	rpl22; SPAC11E3.15	60S ribosomal protein L22
TI4896S004191	38/F12	1.33	SPAC3A11.06	mvp1	phosphoinositide binding; PX domain; involved in intracellular protein transport
TI4896S002599	33/C03	1.33	SPBC1861.02	abp2	ARS binding protein; AT hook protein; non-essential; deletion mutant results in nuclear morphology defects; deletion mutant sensitive to UV; deletion results in aberrant septa; no apparent orthologs
TI4896S003923	16/A03	1.32	SPAC1B2.03c		GNS1/SUR4 family protein; involved in membrane lipid metabolism; similar to Sp SPAC1639.01c
TI4896S002980	28/E05	1.32	SPAC13A11.01c	SPAC2F7.18c	GTPase activator; Rho specific; RhoGAP domain; DEP domain; FCH domain; predicted coiled-coil region; phosphorylated by Shk1p;
TI4896S002989	15/B02	1.32	SPAC3H8.04		sequence orphan; hypothetical protein
TI4896S004432	02/A03	1.32	SPAC23A1.08c	rpl34	60S ribosomal protein L34
TI4896S001713	06/F06	1.32	SPBC29A3.08	pof4	F-box protein; elongin A transcription elongation factor
TI4896S003232	35/C02	1.32	SPAC22A12.09c	sap114	involved in mRNA splicing; Surp domains; complexed with Cdc5p
TI4896S000569	21/G09	1.32	SPCC1753.06c	SPCC162.12	hypothetical protein; serine-rich protein; sequence orphan
TI4896S002603	22/F06	1.32	SPBC1861.06c	B8647-1	Sp specific families; Pfam-B_8647 domain
TI4896S004030	28/H02	1.32	SPAC24C9.11		MIF4G domain; MA3 domain; involved in signal transduction
TI4896S000278	04/G05	1.32	SPCC14G10.03c		putative proteasome maturation factor
TI4896S001954	02/G05	1.31	SPBC25B2.08		hypothetical protein; sequence orphan
TI4896S002703	33/G02	1.31	SPBC1539.09c	trp1	anthranilate synthase component II; includes, glutamineamidotransferase, indole-3-glycerol phophate synthase, N-(5'-phosphoribosyl) anthranilate isomerase
TI4896S000684	01/B10	1.31	SPCC285.15c	rps2802; rps28-2; rps28	40S ribosomal protein 28S
TI4896S003682	44/H10	1.31	SPAC4G9.07	B8647-3	Sp specific families; possiblySp specific; Pfam-B_8647
TI4896S002287	17/A06	1.31	SPBC3B8.07c	dsd1	dihydrosphingosine delta 4 desaturase (pers. comm. Jonathan Napier); sphingolipid delta-4-desaturase (dihydroceramide desaturase) (pers. comm. Jonathan Napier); possible early signal for meiotic differentiation; fatty acid desaturase; no apparent Sc ortholog
TI4896S001537	23/G03	1.31	SPBC28F2.01c	SPBC27.08c	sulfate adenylyltransferase; ATP sulfurylase; involved in methionine biosynthesis
TI4896S004923	39/C07	1.31	SPAC11E3.02c		hypothetical protein C2 domain; similar to Sp SPBC21C3.20C; similar to N. crassa NCU02833.1
TI4896S004748	38/E03	1.31	SPAC4F10.09c		involved in ribosome biogenesis and assembly; CAATT-binding factor homolog
TI4896S000438	20/H04	1.31	SPCC550.12		actin-like protein
TI4896S004244	37/A04	1.31	SPAC17G6.03		calcineurin-like phosphoesterase; similar to Sp SPAC1039.02 and SPBPB2B2.06c (paralogs)
TI4896S000510	02/H01	1.30	SPCC622.02		very hypothetical protein
TI4896S001090	05/F07	1.30	SPBC1685.13		involved in non-classical protein export pathway; non-essential
TI4896S001961	20/C06	1.30	SPBC6B1.04	mde4	no apparent orthologs; involved in meiosis (implicated); involved in sporulation (implicated); Mei4p-dependent expression
TI4896S002547	44/E03	1.30	SPBC3B9.09	vps36	zinc finger protein; zf-RBZ; involved in intracellular protein transport
TI4896S001586	31/E10	1.30	SPBC2F12.04	rpl17	60S ribosomal protein L17; similar to Sp rpl1702
TI4896S001989	25/H02	1.30	SPBC4F6.10	vps901; vps9a	guanyl-nucleotide exchange factor activity; involved in intracellular protein transport; CUE domain protein (inferred from context); involved in endocytosis; involved in protein-vacuolar targeting
TI4896S004701	31/G02	1.30	SPAPYUG7.04c	rpb9	DNA-directed RNA polymerase II (subunit); involved in transcription from Pol II promoter; DNA-directed RNA polymerase activity (function of complex);
TI4896S002611	32/E09	1.29	SPBC14F5.05c	sam1	S-adenosylmethionine synthetase; involved in methionine metabolism
TI4896S001798	26/A05	1.29	SPBC14C8.17c		WD repeat protein; involved in transcriptional activation; SAGA complex (Spt-Ada-Gcn5-Acetyltransferase); ADA complex
TI4896S000236	31/B09	1.29	SPCC5E4.04	cut1	separin; separase; involved in mitotic regulation and sister chromatid separation; promotes anaphase; loaded onto the metaphase spindle by Cut2p; peptidase family C50; shows proteolytic activity toward Rad21/Scc1
TI4896S000174	05/H10	1.29	SPCC364.03	rpl702; rpl17-2; rpl17	60S ribosomal protein L17
TI4896S003398	29/E11	1.29	SPAC23H4.01c	SPAP27G11.01	involved in ergosterol biosynthesis; oxysterol binding protein; ankyrin repeat protein; pleckstrin homology domain; similar to Sp SPBC2F12.05c
TI4896S002584	22/D07	1.29	SPBC1347.12		actin-like protein; centractin-like; no apparent Sc ortholog
TI4896S004260	15/G10	1.29	SPAC1142.02c	SPAC17G6.19c	conserved hypothetical; conserved protein; TPR repeat protein
TI4896S000426	28/E03	1.28	SPCP25A2.03		vertebrate p84 (retinoblastoma binding) orthologue; involved in RNA processing; no apparent Sc ortholog
TI4896S004073	22/F12	1.28	SPAC3G9.07c	phd1; hda1	transcriptional regulator; histone deacetylase; NAD-independent histone deacetylase activity; RPD3-like (class I); involved in transcriptional regulation; involved in chromatin silencing; involved in chromatin assembly/disassembly
TI4896S002255	21/G11	1.28	SPBC17D11.01	SPBC20F10.11	SUMO/centrin/Ubl1 specific protease family
TI4896S000073	51/D11	1.28	SPCC548.03c	wtf4; wtf13	pseudogene; wtf element
TI4896S000974	24/B02	1.28	SPBC31E1.05		nuclear pore complex; involved in RNA export
TI4896S002064	46/E01	1.28	SPBP4H10.11c		fatty acyl coA ligase; similar to Sp SPBC18H10.02 (paralog)
TI4896S002933	29/F09	1.28	SPAC24H6.11c		putative SulP sulfate transporter; STAS domain; cyclic nucleotide-binding domain
TI4896S004452	29/G06	1.27	SPAC26H5.11		involved in spore wall assembly; pleckstrin homology domain
TI4896S001627	40/G03	1.27	SPBC9B6.10	cdc37	chaperone; regulator of Spc SAPK cascade (positive); interacts physically with SPAC24B11.06c
TI4896S001293	37/C04	1.27	SPBC337.17c	SPBC1734.01c	hypothetical protein; Sc YDR365C is null-letha
TI4896S003085	25/F02	1.26	SPAC2G11.13		membrane transporter; unknown specificity
TI4896S004110	11/G09	1.26	SPAC6G9.07c	arp10	ARP2/3 actin-organizing complex; involved in actin assembly and function; involved in actin cortical patch assembly
TI4896S002855	22/F09	1.26	SPAC1F5.10	tif412	translation initiation factor (4a subunit); DEAD/DEAH box helicase; similar to Sp SPAC1006.07
TI4896S003050	24/H07	1.26	SPAC22G7.09c		nucleoporin; nuclear pore complex; involved in nuclear export of the small ribosomal subunit
TI4896S003356	07/H02	1.26	SPAC5D6.06c		conserved hypothetical; related to bacterial glycosyl transferase activity enhancer
TI4896S001772	22/E11	1.25	SPBC17G9.05	cyp6	cyclophilin; peptidyl-prolyl cis-trans isomerase; CRIP family; P. tetraurelia ortholog is involved in cell morphogenesis; no apparent Sc ortholog; RNA-binding protein; rrm RNA recognition motif
TI4896S003097	32/C12	1.25	SPAC23G3.05c		regulator of G-protein signaling (RGS) domain; involved in cell polarity
TI4896S003754	01/A10	1.25	SPAC6B12.06c		hypothetical protein
TI4896S000497	11/D03	1.25	SPCC338.05c	mms2; spm2	ubiquitin conjugating enzyme; involved in DNA repair; involved in error-free post-replication repair; interacts physically with Spu13p; functionally complements Sc MMS2; deletion mutant is sensitive to DNA damaging agents
TI4896S004833	38/E02	1.25	SPAC22E12.11c		involved in transcriptional regulation; zinc finger protein; zf-PHD finger; SET domain; histone lysine methyltransferase
TI4896S002880	20/B09	1.25	SPAC12G12.10		hypothetical protein; WD repeat protein
TI4896S003126	40/F09	1.24	SPAC1687.15	gsk3; skp1	serine/threonine protein kinase; glycogen synthase kinase 3 (GSK-3) family; involved in cytokinesis; interacts physically with Cdc14p; involved in mitosis (progression); phosphorylated at S-335; non-essential; deletion mutant sensitive to heat shock; deletion mutant results in sporulation defects; overexpression suppresses cdc14-118 cytokinesis defect; similar to Sp gsk31
TI4896S000532	21/G07	1.24	SPCC61.05		Sp specific families; similar to Sp SPCC569.06
TI4896S003465	25/G12	1.24	SPAC17A5.04c		zinc metallopeptidase; disintegrin/ADAM protease; GPI anchored protein (pers. comm. Birgit Eisenhaber); glycoprotein; non-essential; no apparent Sc ortholog
TI4896S002047	18/F01	1.24	SPBC19C7.12c		alpha-1,2-mannosyltransferase; glycosyl transferase family 15; similar to S. cerevisiae YOR099W and YKR061W and YJL139C and YDR483W and YBR205W and YBR199W and YPL053C; conserved fungal protein
TI4896S001665	16/D06	1.24	SPBC16E9.08		hypothetical protein; predicted coiled-coil region; sequence orphan
TI4896S001657	32/H05	1.24	SPBP16F5.08c		flavin dependent monooxygenase; involved in protein folding; disulphide bond formation
TI4896S002561	31/C05	1.23	SPBC215.04	git11	G gamma subunit of the gpa2/git5/git11 heterotrimeric G protein; no apparent orthologs; glucose/cAMP pathway; related to Sc YJR086W but not functional ortholog
TI4896S001181	24/C11	1.23	SPBC577.09		WD repeat protein; highly similar to human cockayne syndrome WD repeat protein; no apparent Sc ortholog
TI4896S003954	51/G07	1.23	SPACUNK4.19		hypothetical protein; sequence orphan
TI4896S004340	24/H01	1.23	SPAC4H3.10c	pyk1	14-3-3 protein; involved in DNA repair; involved in DNA damage checkpoint; similar to Sp rad24; involved in cell wall organization and biogenesis (maintenance); involved in cytokinesis; mutant is hypersensitive to spindle poison N-3-chlorophenyl carbamate; negatively regulates Byr2p by affecting its localization; (0ld-> pyruvate kinase (EC 2.7.1.40))
TI4896S002632	10/C07	1.23	SPBC16G5.03		zinc finger protein; zf-C3HC4 type (RING finger); ubiquitin ligase (E3); no apparent orthologs
TI4896S002098	10/C09	1.23	SPBC2A9.09		conserved phosducin-like protein; involved in pheromone response
TI4896S004454	10/B01	1.22	SPAC26H5.13c		conserved fungal protein; sphingoid long chain base (LCB) kinase; similar to S. cerevisiae YOR171C and YLR260W; 4 predicted transmembrane helices
TI4896S003145	29/D05	1.22	SPAC222.14c		conserved hypothetical; GTP-binding protein; similarity in the C-terminal region to human GBP1, an interferon-induced GTP-binding protein
TI4896S001519	04/E09	1.22	SPBC83.12		hypothetical protein
TI4896S000653	36/G03	1.22	SPCC1450.14c		involved in protein disulfide bond formation
TI4896S001866	31/E09	1.22	SPBC36B7.06c		hypothetical protein; sequence orphan
TI4896S002528	04/B01	1.22	SPBC26H8.13c		very hypothetical protein; sequence orphan
TI4896S002872	23/A07	1.22	SPAC18B11.03c		hypothetical protein
TI4896S002931	38/F07	1.22	SPAC24H6.13		eukaryotic conserved protein; Sc homolog RSN1 is involved in tunicamycin sensitivity; DUF221
TI4896S003102	32/G05	1.21	SPAC23G3.10c		involved in transcriptional regulation, chromatin remodeling
TI4896S002040	04/A05	1.21	SPBC19C7.05		hypothetical protein; sequence orphan
TI4896S004590	15/D07	1.21	SPAC17C9.11c		conserved protein; zinc finger protein; zf-C2H2 type; UBX domain; no apparent Sc ortholog
TI4896S002923	35/G11	1.21	SPAC13C5.03	tht1	nuclear fusion protein; required for the fusion of nuclear; envelopes during karyogamy
TI4896S001188	25/A10	1.21	SPBC530.01		TBC domain protein; GTPase activating protein of Rab-like GTPase
TI4896S004189	37/H12	1.21	SPAC3A11.08	pcu4; Cul-4	cullin family; regulator of ribonuceotide reductase localization; copurifies with signalosome
TI4896S002170	09/B02	1.20	SPBC1778.08c		ARP2/3 actin-organizing complex; involved in actin cortical patch assembly; involved in actin assembly and function
TI4896S003482	08/A04	1.20	SPAC1002.02		hypothetical protein
TI4896S003594	19/E06	1.20	SPAC732.02c		fructose-2,6-bisphosphatase
TI4896S003002	22/C09	1.20	SPAC1F3.07c		hypothetical protein; sequence orphan
TI4896S003282	09/A05	1.20	SPAC6F12.03c		SNARE; 1 t-SNARE coiled-coil homology domain; involved in versicle-mediated protein transport between the Golgi and the vacuole; no apparent S. cerevisiae ortholog
TI4896S000790	17/E12	1.20	SPCC126.05c		mitochondrial ribosomal protein L30
TI4896S002524	22/A08	1.19	SPBC26H8.03	cho2	phosphatidylethanolamine methyltransferase
TI4896S003707	21/C01	1.19	SPAC13G7.12c		choline kinase
TI4896S002510	05/H06	1.19	SPBC1604.10	srb7	RNA polymerase II holoenzyme component; mediator complex subunit; involved in regulating RNA polymerase II activity
TI4896S000376	22/E03	1.19	SPCC1795.02c	SPCC895.01	CaCA proton/calcium exchanger
TI4896S000274	19/G10	1.19	SPCC18B5.10c		conserved hypothetical; WD repeat protein; no apparent Sc ortholog
TI4896S000987	05/A08	1.19	SPBC800.12c		ubiquitin family protein
TI4896S004789	25/E09	1.19	SPAC1B3.09c		involved in ribosome biogenesis and assembly; involved in ribosome nucleus export; similar to Sp SPAC1142.04; predicted coiled-coil region
TI4896S000748	45/B08	1.18	SPCC1906.03	wtf19; wtf1	wtf element
TI4896S001309	47/C07	1.18	SPBC1734.17	chs2; SPBC1709.01	chitin synthase family; involved in septum formation; similar to Sp SPAC13G6.12C
TI4896S004464	09/E08	1.18	SPAC25B8.10		methyltransferase; tandem duplication
TI4896S003130	22/G12	1.18	SPAC1687.19c		queuine tRNA-ribosyltransferase; no apparent Sc ortholog
TI4896S000369	25/C08	1.17	SPCC1795.09		aspartic protease; yapsin subfamily; GPI anchored protein; glycoprotein; spcificity C terminal to basic or dibasic amino acids; cleavage site Ser-17; cleavage site Lys-Arg45; localization cell wall; GPI attachment site Asn-495; involved in cell wall biosynthesis (implicated); overexpression rescues krp1 mutant
TI4896S003631	01/H07	1.17	SPAC23C11.07		hypothetical protein; sequence orphan; has transcript profile on microarray
TI4896S003803	22/B11	1.17	SPAC25H1.06		WD repeat protein; involved in chromatin assembly/disassembly; no apparent Sc ortholog
TI4896S002072	22/B08	1.17	SPBP4H10.19c		calreticulin/calnexin homolog; no apparent Sc ortholog
TI4896S004398	01/B09	1.17	SPAC27E2.11c		Sp specific families; hypothetical protein; possibly Sp specific; GPI anchored protein (pers. comm. Birgit Eisenhaber); glycoprotein; no apparent Sc ortholog
TI4896S003548	18/D08	1.17	SPAC3H1.13		serine/threonine protein kinase
TI4896S001748	32/G02	1.17	SPBC23G7.12c	let1; rpt6	19S proteasome regulatory subunit; AAA family ATPase
TI4896S001058	27/G05	1.17	SPBC428.07	meu6	lysine-rich protein; predicted coiled-coil region; meiotic expression upregulated; NLS (bipartite); pleckstrin homolgy domain; no orthologs
TI4896S000613	03/F11	1.17	SPCC663.13c		hypothetical N acetyltransferase protein
TI4896S000831	51/C11	1.17	SPCC1919.06c	wtf25; wtf9-pseudo	wtf element
TI4896S004408	34/A09	1.16	SPAPJ698.03c	prp12; sap130	involved in mRNA splicing; U2 snRNP-associated protein; involved in cell cycle progression; complexed with Cdc5p
TI4896S003015	28/H01	1.16	SPAC1D4.10		eukaryotic conserved protein; lactamase B family
TI4896S002965	14/A05	1.16	SPAC2F7.02c		protein phosphatase; involved in sodium stress response; NLI interacting factor family
TI4896S001379	08/C10	1.16	SPBC651.06		hypothetical protein; sequence orphan
TI4896S003596	18/B09	1.16	SPAC3C7.02c		conserved hypothetical; hypothetical protein; similar to Sp meu14 and SPCC736.02c
TI4896S001229	43/A11	1.16	SPBC216.03		conserved hypothetical; conserved hypothetical protein
TI4896S002922	22/H03	1.16	SPAC13C5.02		hyphal growth protein 1; WW domain (2); FF domain
TI4896S000284	44/A05	1.16	SPCC1020.09		similar to guanine nucleotide-binding protein; WD repeat protein; no apparent Sc ortholog; non-essential
TI4896S003021	23/C06	1.16	SPAC22F3.12c	rgs1	regulator of G-protein signalling; regulates pheromone response; involved in mating (required)
TI4896S001096	39/H08	1.16	SPBC649.04	uvi15	UV induced protein required for the maintenance of viability of cells in stationary phase and in starvation condition; induced by UV; induced by stress; induced by alkylating agents and heat shock; Fibrillarin binds to a 3' cis-regulatory element in pre-mRNA; non-essential
TI4896S002026	40/F08	1.15	SPBC32F12.04	tug1; gtb1	tubulin gamma chain; gamma tubulin complex; involved in G1 progression (required); spindle assembly checkpoint component; involved in chromosome segregation; involved in cytokinesis; essential
TI4896S003690	17/H02	1.15	SPAC4G9.15		ketoreductase activity; involved in fatty acid biosynthesis; involved in fatty acid elongation; involved in very-long-chain fatty acid metabolism
TI4896S003836	19/G02	1.15	SPAC823.16c		conserved hypothetical; WD repeat protein
TI4896S003955	29/E10	1.15	SPACUNK4.16c		glycosyl transferase family 20; alpha,alpha-trehalose-phosphate synthase; involved in the de-phosphoryulation of trehalose-6-phosphate to trehalose and orthophosphate; similar to Sp SPAC22F8.05
TI4896S000433	25/G01	1.15	SPCC550.07		acetamidase
TI4896S002691	28/G08	1.15	SPBC244.03	sec27; SPBC16C6.13c	coatomer (beta' subunit); 6 WD repeat protein; the coatomer is a cytosolic protein complex that binds to dilysine motifs and reversibly associates with Golgi non- clathrin-coated vesicles, which further mediate biosynthetic protein transport from the ER, via the Golgi up to the trans Golgi network; Coatomer complex is required for budding from Golgi membranes, and is essential for the retrograde …
TI4896S002554	30/E02	1.15	SPBC3B9.16c		nucleoporin; nuclear pore complex
TI4896S002447	08/F03	1.14	SPBC31F10.05		hypothetical protein; sequence orphan
TI4896S001080	09/H03	1.14	SPBC1685.03		signal sequence processing protein, peptidase; essential
TI4896S000802	24/C07	1.14	SPCC1620.02	wtf23; wtf10	wtf element
TI4896S004580	48/G02	1.14	SPAC9E9.12c	abc1	Abc1 transporter; ABC transporter family; MDR subfamily; similar to mammalian bile acid transporter
TI4896S002405	34/G04	1.14	SPBP8B7.18c		conserved hypothetical; TENA/THI domain; similar to Sp SPBP8B7.17C and SPCC18B5.05C (paralogs); tandem duplication in pB8B7
TI4896S000299	38/E08	1.13	SPCC1393.07c		hypothetical protein; sequence orphan
TI4896S000381	28/F05	1.13	SPCC895.06		WD repeat protein
TI4896S001375	16/A07	1.13	SPBC651.02		carbon-nitrogen hydrolase family
TI4896S004518	33/G11	1.13	SPAC25G10.04c	rec10	involved in meiotic recombination (required); involved in sister chromatid cohesion; no apparent orthologs
TI4896S004726	45/E04	1.13	SPAC22F8.07c		Myb family; DNA binding protein; similar to Sp SPBC1198.11c (paralog); termination factor for RNA polymerase I; transcription factor for RNA polymerase II
TI4896S002345	10/D02	1.13	SPBC1105.09	ubc15	ubiquitin conjugating enzyme; involved in the regulation of transcriptional silencing of heterochromatin; no apparent Sc ortholog; involved in transcriptional silencing of the mating-type region; overexpression derepressed transcriptional silencing of the mating-type region
TI4896S000265	49/H06	1.13	SPCC18B5.01c	bfr1;hba2; SPCPJ732.04c	brefeldin A efflux transporter; ABC transporter family; PDR subfamily; similar to Sp SPAPB24D3.09c
TI4896S001094	31/F07	1.13	SPBC649.02	rps1902; rps19-2; rps19	40S ribosomal protein S19; similar to Sp rps1901
TI4896S003758	23/C12	1.13	SPAC6B12.10c	pri1	DNA primase small subunit; DNA primase activity; involved in telomere maintenance
TI4896S001300	32/H12	1.13	SPBC1734.08		STAM like protein; similar to mammalian signal transducing adaptor; VHS domain; src (SH3) homology domain; possibly forms a complex with Vps27p; involved in the recycling of Golgi proteins; putative sorting receptor for ubiquitinated membrane proteins destined for degradation
TI4896S001569	39/A03	1.13	SPBC19C2.09		putative DNA-binding protein membrane-tethered transcription factor; basic helix-loop-helix (bHLH); DNA binding protein; Myc type dimerisation domain
TI4896S002857	44/G03	1.13	SPAC1F5.08c	yam8; ehs1	involved in calcium ion transport; GPI anchored protein; glycoprotein
TI4896S002937	07/A04	1.13	SPAC24H6.07	rps901; rps9a; rps9-1	40S ribosomal protein S9; similar to Sp rps902
TI4896S004138	25/F10	1.12	SPAC26A3.01	sxa1; SPAC2E1P5.06	aspartic protease; involved in conjugation; GPI anchored protein(pers. comm. Birgit Eisenhaber); glycoprotein; no apparent Sc ortholog
TI4896S004681	17/G05	1.12	SPAC1834.06c		mo25 family protein; essential; conserved eukaryotic protein
TI4896S004625	21/E06	1.12	SPAC637.12c	mst1	MYST-family HAT (pers. comm. S. Forsburg); histone acetyltransferase; MOZ/SAS domain; chromodomain protein; involved in transcriptional silencing
TI4896S001554	10/G06	1.12	SPBC21B10.08c		hypothetical protein; sequence orphan
TI4896S003677	14/B04	1.11	SPAC4G9.02		ribonuclease H; endonuclease; possibly degrades RNA in RNA-DNA hybrids
TI4896S003178	03/G12	1.11	SPAC23C4.13	bet1	SNARE; BET1 family; 1 t-SNARE coiled-coil homology domain; 1 predicted transmembrane helix; required for vesicular transport from the ER to the Golgi complex. Functions as a SNARE associated with ER-derived vesicles (By similarity).
TI4896S004465	27/D11	1.11	SPAC25B8.11		involved in transcriptional regulation; zinc finger protein; possible activator for allantoin, 4-aminobutyric acid (GABA), and urea catabolic genes
TI4896S003734	24/F01	1.11	SPAC22H10.05c		involved in cleavage and polyadenylation; CF IA component
TI4896S004272	03/F08	1.11	SPAC8C9.07		very hypothetical protein
TI4896S002041	37/F01	1.11	SPBC19C7.06		proline-tRNA ligase; involved in prolyl-tRNA aminoacylation; proline-tRNA ligase activity
TI4896S004912	16/A10	1.11	SPAC14C4.10c		Nudix family hydrolase; involved in the hydrolysis of nucleoside diphosphate derivatives; no apparent Sc ortholog
TI4896S004100	28/H08	1.11	SPAC6G10.09		mannosyl-oligosaccharide glucosidase; glycosyl hydrolase family 63
TI4896S001454	32/D07	1.11	SPBC8D2.17		alpha-1,2-galactosyltransferase; GMA12/MNN10 family; predicted N-terminal signal sequence; similar to S. pombe gmh1 and gmh3 and gmh2 and gma12 and SPAC5H10.13C and SPBC1289.13c and SPAC637.06 paralogs
TI4896S000730	22/F02	1.11	SPCC18.10		pyridoxine-pyridoxal-pyridoxamine kinase; similar to Sp SPAC6F6.11C (paralog)
TI4896S001820	04/H06	1.11	SPBC16H5.15		hypothetical protein; sequence orphan
TI4896S000261	24/F04	1.11	SPCC16C4.18c	taf50	transcription initiation factor TFIID subunit; histone H4-like TAF; interacts with the C-terminal WD repeat-containing region of Taf72p; essential; TAF(II) complex (TBP-associated protein complex); SAGA complex; involved in establishment and/or maintenance of chromatin architectur; involved in transcriptional activation
TI4896S004500	05/C07	1.10	SPAC2C4.03c	smd2; cwf9	small nuclear ribonucleoprotein; involved in mRNA splicing; complexed with Cdc5p
TI4896S000591	20/C11	1.10	SPCC777.08c		hypothetical protein; sequence orphan; predicted coiled-coil region
TI4896S000772	10/B07	1.10	SPCC576.04		hypothetical protein; UPF0005
TI4896S002738	50/C08	1.10	SPBPB2B2.10c		galactose-1-phosphate uridylyltransferase
TI4896S000353	01/H09	1.10	SPCC24B10.16c		hypothetical protein; sequence orphan
TI4896S004713	04/C04	1.10	SPAC1782.10c	nhp2	involved in rRNA pseudouridinylation
TI4896S003199	20/E09	1.09	SPAC30D11.11		widely conserved protein; UPF0073; involved in the regulation of lipid and phosphate metabolism; PAC domain (SMART) which is implicated signal transduction and transcriptional regulation (inferred from context)
TI4896S000232	23/B02	1.09	SPCC31H12.06		hypothetical protein; sequence orphan
TI4896S003051	17/F12	1.09	SPAC22G7.10		polyadenylation factor (PF1 subunit); directly interacts with poly(A) polymerase
TI4896S002553	30/D02	1.09	SPBC3B9.15c		WD repeat protein; 5 predicted transmembrane helices; predicted N-terminal signal sequence; sterol sensing domain; no apparent S. cerevisiae ortholog
TI4896S003147	21/D10	1.09	SPAC821.02c	csn3; SPAC222.16c	COP9/signalosome complex (subunit 3); no apparent Sc ortholog
TI4896S004633	04/D05	1.09	SPAC12B10.06c		widely conserved protein DUF339
TI4896S001296	22/E01	1.08	SPBC1734.04	SPBC337.20	alpha-1,6-mannosyltransferase complex subunit predicted; belongs to the ANP1/MMN9/VAN1 family; similar to S. cerevisiae YEL036C and YML115C and YPL050C
TI4896S001099	26/E09	1.08	SPBC354.02c	sec61	translocon (alpha subunit); involved in protein-ER targeting; essential
TI4896S001684	37/F05	1.08	SPBC1A4.05		hypothetical protein; sequence orphan; predicted coiled-coil protein
TI4896S001941	09/D12	1.08	SPBC2G5.02c		casein kinase II (beta subunit); similar to Sp ckb1
TI4896S004134	04/F11	1.08	SPAC2E1P5.02c		hypothetical protein; sequence orphan
TI4896S001413	33/H11	1.08	SPBC27B12.06		involved in GPI anchor biosynthesis; involved in adding phospho-ethanolamine to the third mannose
TI4896S003472	20/E02	1.08	SPAC17A5.11	rec12	Spo11/Top6A topoisomerase family; expression meiosis induced; involved in meiotic recombination (required); involved in meiotic dsDNA break formation (required); deletion mutant results in recombination defects; deletion mutant results in segregation defects; mutant rec12-117 lacked most crossover recombination; mutant rec12-117 segregated abnormally; mutant rec12-Y98F segregated abnormally; muta…
TI4896S000293	29/H03	1.08	SPCC1020.01c	pma2; SPCC1393.01	P-type proton ATPase; P3 type
TI4896S001571	21/B01	1.08	SPBC19C2.11c		hypothetical protein; possibly fungal specific
TI4896S004724	38/H06	1.08	SPAC22F8.05		alpha,alpha-trehalose-phosphate synthase; glycosyl transferase family 20; similar to Sp SPACUNK4.16c (paralog)
TI4896S001483	50/E07	1.08	SPBC32H8.02c	pi021; SPACTOKYO_453.14c	Ulp1 protease family
TI4896S002900	20/C08	1.07	SPAC630.12		serine/threonine protein phosphatase; calcineurin-like phosphoesterase
TI4896S003070	25/G07	1.07	SPAC16C9.04c		basal transcriptional regulator; zinc finger protein; zf-CCCH type; CCR4-Not complex; rrm RNA recognition motif; RNA-binding protein
TI4896S002508	38/E04	1.07	SPBC1604.12		hypothetical protein; sequence orphan
TI4896S001398	10/D01	1.07	SPBC3D6.11c		zinc finger protein; zf-C3HC4 type (RING finger); ubiquitin ligase (E3)
TI4896S002320	25/D04	1.07	SPBC2G2.11		glycylpeptide N-tetradecanoyltransferase; involved in N-terminal protein myristoylation
TI4896S001108	05/B08	1.07	SPBC354.11c		hypothetical protein; sequence orphan; non-essential
TI4896S000158	07/E01	1.07	SPCC4G3.13c		CUE domain protein; involved in the ubiquitin system; possibly recruits a soluble ubiquitin-conjugating enzyme to the membrane
TI4896S003156	04/C02	1.06	SPAC821.10c	sod1	Cu, Zn-superoxide dismutase; induced by Pap1p; induced by oxidative stress
TI4896S004455	04/H03	1.06	SPAC25B8.01	SPAC26H5.15	MAPR family steroid-binding protein; involved in DNA repair; involved in DNA damage response; involved in sterol metabolism
TI4896S002128	36/G02	1.06	SPBC15D4.09c		cystathionine gamma-synthase; involved in cysteine metabolism; involved in methionine biosynthesis from homoserine via O-succinyl-L; homoserine and cystathione; cystathionine gamma-synthase activity
TI4896S002322	19/G05	1.06	SPBC2G2.13c		deoxycytidylate deaminase
TI4896S000530	14/C06	1.06	SPCC61.03		conserved hypothetical; conserved protein; broad species distribution; UPF0031
TI4896S002328	26/C01	1.05	SPBC1718.02		zinc finger protein; zf-PHD finger; involved in transcriptional regulation; no apparent orthologs
TI4896S004046	41/G04	1.05	SPAC589.04		metaxin1; mitochondrial outer membrane protein; involved in mitochondrial protein transport; preprotein import complex component; no apparent Sc ortholog
TI4896S003043	48/B08	1.05	SPAC22G7.02		karyopherin-beta; involved in nuclear transport
TI4896S004884	29/G09	1.05	SPAC26F1.08c		conserved hypothetical; hypothetical protein
TI4896S004463	09/C07	1.05	SPAC25B8.09		methyltransferase; similar to Sp SPAC25B8.10; tandem duplication
TI4896S003170	20/H06	1.05	SPAC23C4.05c		Sp specific families; hypothetical protein; similar to Sp SPBC365.12c (C-term); no apparent orthologs
TI4896S002487	29/G10	1.05	SPBC23E6.07c	rfc1	replication factor C (activator 1) subunit; activator of DNA polymerases; BRCT domain; AAA family ATPase
TI4896S002105	05/H09	1.05	SPBC2D10.07c		mitochondrial membrane protease subunit
TI4896S002991	20/C09	1.05	SPAC3H8.06	aur1	inositol phosphorylceramide synthase; involved in aureobasidin A resistance; involved in cellular morphogenesis
TI4896S003651	16/B06	1.05	SPAC1783.03		sequence orphan; hypothetical protein
TI4896S004268	24/D06	1.05	SPAC8C9.03	cgs1; rak1	cAMP-dependent protein kinase; negative regulator of meiosis; mutant (cgs1-1) displays cAPK activity unregulated by cyclic AMP (cAMP); (old-> cAMP-dependent protein kinase regulatory chain)
TI4896S002385	23/B06	1.04	SPBC16D10.10		tRNA specific adenosine deaminase activity; involved in tRNA modification
TI4896S000579	29/G05	1.04	SPCC162.02c		AMP-binding dehydrogenase; involved in antibiotic synthesis in bacteria; no apparent Sc ortholog
TI4896S004690	33/F11	1.04	SPAC17D4.03c		metal transporter; cation efflux family
TI4896S000277	31/A03	1.04	SPCC14G10.02	SPCC18B5.13	hypothetical protein
TI4896S002772	50/G04	1.04	SPAC977.10	sod2	CPA1 sodium ion/proton antiporter; similar to Sp SPAC3A11.09 (paralog)
TI4896S002574	32/D11	1.04	SPBC1347.02	fkbp39	peptidyl-prolyl cis-trans isomerase (FKBP-type); similar to Sp SPAC27F1.06C (paralog)
TI4896S002395	17/A09	1.04	SPBP8B7.08c		leucine carboxyl methyltransferase; involved in protein modification
TI4896S002526	22/B06	1.04	SPBC26H8.05c		serine/threonine protein phosphatase
TI4896S004787	09/B01	1.04	SPAC1B3.07c	vps28	involved in intracellular protein transport; involved in protein-membrane targeting; involved in protein-vacuolar targeting
TI4896S001464	33/A07	1.04	SPBC17A3.07	pgr1; pi039	glutathione reductase; essential; maintains high levels of glutathione in the cytosol
TI4896S002695	42/E12	1.03	SPBC1539.01c		hypothetical protein; sequence orphan
TI4896S001609	14/C08	1.03	SPBC18H10.10c	cwc16	eukaryotic conserved protein; interacts physically with cwf3p (2-hybrid S. cerevisiae); involved in mRNA splicing; complexed with Cdc5p
TI4896S002941	40/H10	1.03	SPAC24H6.03	pcu3	cullin family
TI4896S003344	11/A10	1.03	SPAC9.08c		steroid reductase; no apparent Sc ortholog
TI4896S002501	27/C01	1.03	SPBC1604.19c		TRAPP; involved in intracellular protein transport; similar to Sp SPBC1734.07C (paralog)
TI4896S001553	36/B02	1.03	SPBC21B10.09		acetyl-coenzyme A transporter
TI4896S001948	34/B02	1.03	SPBC25B2.02c	mam1; SPBC2G5.09c	ABC transporter family; MDR subfamily; mating factor; M-factor transporter
TI4896S004689	39/F03	1.03	SPAC17D4.02	sna41; goa1	Cdc45 related protein pre-replicative complex; involved in DNA replication (initiation); involved in loading of DNA polymerase alpha onto MRC complex (required); essential; chromatin binding during S phase
TI4896S002614	19/B06	1.03	SPBC14F5.08	med7	RNA polymerase II holoenzyme component; mediator complex subunit; essential; involved in regulating RNA polymerase II activity
TI4896S000063	07/H07	1.03	SPCC1235.08c	pdh1	conserved eukaryotic protein; similar to S. cerevisiae YOL107W; predicted N-terminal signal sequence; 7 predicted transmembrane helices; essential
TI4896S002030	04/H07	1.03	SPBC32F12.08c		hypothetical protein
TI4896S002453	46/C09	1.02	SPBC31F10.11c	cwf4; syf3	hypothetical protein; involved in mRNA splicing; complexed with Cdc5p; 40S snRNP-containing complex
TI4896S003877	22/G07	1.02	SPAC644.16		RNA-binding protein; involved in polyadenylation; rrm RNA recognition motif
TI4896S001521	20/E03	1.02	SPBC83.14c	rfc5	replication factor C (activator 1 subunit); AAA family ATPase; activator of DNA polymerases
TI4896S003732	48/B05	1.02	SPAC22H10.03c	kap114	ranbp7-importin-beta-cse1p family protein
TI4896S001356	22/H05	1.02	SPBC725.01		aspartate aminotransferase; similar to Sp SPAC10F6.13C (paralog)
TI4896S003057	35/D07	1.02	SPAC4G8.05		serine/threonine protein kinase; similar to Sp SPBC1861.09
TI4896S000971	33/H08	1.02	SPBC31E1.02c	pgak2	P-type calcium ATPase; P2 type
TI4896S004217	25/D09	1.02	SPAC16E8.11c		transcription factor TFIIH complex; general RNA polymerase II transcription factor activity; BSD domain (2)
TI4896S001381	30/G05	1.02	SPBC651.08c	rpc1	DNA-directed RNA polymerase III
TI4896S003777	30/B05	1.01	SPAC19A8.08	upf2	involved in the regulation of translation
TI4896S002356	37/D02	1.01	SPBC887.02		ClC chloride channel
TI4896S000087	28/G05	1.01	SPCC794.08		hypothetical protein
TI4896S001313	33/E06	1.01	SPBC1709.05	sks2; hsc1	heat shock protein 70 family; confers K-252a resistance
TI4896S003869	08/C07	1.01	SPAC644.08		enolase-phosphatase E1
TI4896S003471	07/G08	1.01	SPAC17A5.10		conserved hypothetical protein
TI4896S000319	06/H06	1.01	SPCC63.12c		20S proteasome component (beta 3)
TI4896S001597	06/D05	1.01	SPBC11G11.04	trs20	TRAPP; Sedlin subfamily; involved in intracellular protein transport; human disease X-linked spondyloepiphyseal dysplasia tarda ortholog; similar to S. cerevisiae YBR254C
TI4896S003431	45/H03	1.01	SPAC343.17c		WD repeat protein; no apparent Sc ortholog
TI4896S002442	10/C05	1.01	SPBC13G1.12		SNF7 family; involved in intracellular protein transport; involved in protein-vacuolar targeting; class E vps
TI4896S002860	04/A09	1.01	SPAC1F5.05c		hypothetical protein; sequence orphan; has EST
TI4896S003197	12/B08	1.01	SPAC30D11.13	hus5; ubc9	experimentally characterised; ubiquitin conjugating enzyme; involved in mitosis (required); interacts physically with Rad51p; SUMO conjugator; involved in S phase arrest recovery (required)
TI4896S000507	17/C01	1.01	SPCC1281.08	wtf11	wtf element
TI4896S001604	36/B06	1.00	SPBC18H10.05		WD repeat protein; similar to Sp SPAC3H5.08C
TI4896S003515	50/E10	1.00	SPAPB1A10.08		hypothetical protein; sequence orphan
TI4896S005021	05/F12	1.00	SPAC186.06		hypothetical protein
TI4896S000841	29/F02	1.00	SPCC790.02	pep3	zinc finger protein; zf-C3HC4 type (RING finger); ubiquitin ligase (E3); involved in nuclear migration (sensu Fungi); involved in cell polarity; involved in mitochondrial morphology; clathrin domain (inferred from context); involved in intracellular protein transport; involved in vacuole fusion; predicted coiled-coil region
TI4896S002187	03/F02	1.00	SPBC405.05		hypothetical protein; sequence orphan
TI4896S004298	42/C01	1.00	SPAC15E1.03	rpl36a	60S ribosomal protein L36/L42
TI4896S002910	26/A06	1.00	SPAC31A2.06		sequence orphan; hypothetical protein
TI4896S004653	05/H05	0.99	SPAC30C2.05	erv14	cornichon family; 3 predicted transmembrane helices; predicted N-terminal signal sequence; involved in intracellular protein transport; ER-derived vesicle protein; involved in intracellular protein transport; involved in ER to Golgi transport; COPII-coated vesicle associated; similar to Sp SPAC2C4.05
TI4896S000778	18/E08	0.99	SPCC576.10c	rpt3	19S proteasome regulatory subunit; AAA family ATPase
TI4896S001880	24/C05	0.99	SPBC21D10.11c		aminotranferase class V; cysteine desulpherase; involved in cysteine metabolism; involved in alanine metabolism; possibly supplies inorganic sulfur for iron sulfur clusters; (old->tRNA splicing protein)
TI4896S003599	20/E10	0.99	SPAC3C7.05c		glycosyl hydrolase family 76; alpha-1,6-mannanase; similar to Sp SPCC970.02
TI4896S001655	33/A06	0.99	SPBP16F5.06		involved in ribosome biogenesis and assembly; rrm RNA recognition motif; RNA-binding protein
TI4896S004450	17/D12	0.99	SPAC26H5.09c		oxidoreductase; GFO_IDH_MocA family; similar to Sp SPBC115.03 (paralog)
TI4896S003363	39/D06	0.99	SPAC57A7.11	mip1	putative guanine nucleotide binding protein WD repeat protein; facilitates function of the meiotic regulator Mei2p
TI4896S005016	14/B06	0.98	SPAC186.01		Sp specific families; glycoprotein; serine/threonine-rich; similar to Sp SPBC359.04C and SPBC947.04
TI4896S004375	06/C04	0.98	SPAC2F3.02		SRP receptor complex; SRP receptor activity; involved in protein-ER targeting; TPR repeat protein
TI4896S002230	27/F01	0.98	SPBC25H2.16c		VHS domain; GAT domain; involved in intracellular protein transport; adaptin C-terminal domain; similar to S. pombe SPAC1F3.05
TI4896S004891	29/D09	0.98	SPAC26F1.01	sec74; SPAPJ691.01c	Sec7 domain; pleckstrin homology domain; domain combination also occurs in human and C. elegans cytohesins; homologs appear to be guanine nucleotide exchange factor for ADP-ribosylation factors; binds phosphoinositides and/or involved in vesicular transport
TI4896S003924	10/G12	0.97	SPAC1B2.04	cox6	cytochrome c oxidase (subunit VI)
TI4896S004429	01/E09	0.97	SPAC23A1.05		very hypothetical protein
TI4896S003213	23/G07	0.97	SPAC56F8.05c		conserved hypothetical protein; conserved yeast protein; similar to S. cerevisiae YIL041W
TI4896S002977	11/E11	0.97	SPAC2F7.15		mitochondrial ribosomal protein small subunit
TI4896S003636	01/B08	0.97	SPAC23C11.12	hcn1	anaphase-promoting complex (APC); high copy suppressor of cut9
TI4896S002952	09/B06	0.97	SPAC227.06		Rab interactor activity; Sc YIP5 is predicted to be involved in vesicular transport and membrane fusion from 2-hybrid data
TI4896S000273	02/C04	0.97	SPCC18B5.09c		very hypothetical protein
TI4896S004069	31/E06	0.97	SPAC3G9.03	rpl2301; rpl23-1; rpl23	60S ribosomal protein L23
TI4896S000942	27/C10	0.96	SPBC1683.13c		transcriptional regulator; zinc finger protein; similar to Sp SPCC757.04 and SPCC777.02
TI4896S001027	01/E10	0.96	SPBC106.05c	tim11	tim11, FO-ATPase subunit E, non-essential, similar to S. cerevisiae YDR322C-A
TI4896S003115	28/A05	0.96	SPAC1687.05	pli1	septin interacting protein homolog; zinc finger protein; zf-MIZ; SAP domain; DNA-binding protein; septin-sumoylation; possibly interacts with ubiquitin conjugating enzyme
TI4896S004845	21/A07	0.96	SPAC1006.01		serine protease; similar to Sp SPAC4A8.04
TI4896S000054	29/A01	0.96	SPCC320.04c		eukaryotic conserved protein; Rho GTPase; involved in apoptosis; ATP/GTP binding; EF hand motifs; calcium binding protein
TI4896S000113	04/B02	0.96	SPCC736.10c		putative mitochondrial ribosomal protein S8; CAAX box
TI4896S002123	32/H04	0.96	SPBC15D4.04	gpt2; gpt	UDP-N-acetylglucosamine--dolichyl-phosphate N-acetylglucosaminephosphotransferase
TI4896S004669	10/F08	0.95	SPAC144.12		ribose 5-phosphate isomerase; involved in pentose-phosphate shunt, non-oxidative branch; ribose-5-phosphate isomerase activity
TI4896S000127	38/G03	0.95	SPCC1682.02c	mcm3	MCM complex subunit; involved in DNA replication (initiation) (required)
TI4896S003238	27/C11	0.95	SPAC22A12.15c	bip1; bip	resident luminal ER protein; essential; heat shock protein 70 family; involved in assembly of multimeric complexes in the ER; interacts physically with Cnx1p
TI4896S004814	28/D06	0.95	SPAC1952.16		FCH domain; RhoGAp (GTPase activator towards Rho/Rac/Cdc42-like small GTPases); Fes/CIP4 homology domain; similar to Sp SPAC2F7.18C
TI4896S002712	22/A01	0.95	SPBC1289.08		UDP-n-acetylglucosamine pyrophosphorylase; involved in UDP-GLCNAC biosynthesis (4th step)
TI4896S003647	29/E02	0.95	SPAC13F5.06c	sec10	involved in secretory pathway; involved in exocytosis
TI4896S004952	16/D02	0.95	SPAC4D7.02c		glycerophosphoryl diester phosphodiesterase; hydrolyses deacylated phopholipids to G3p and the corresponding alcohols
TI4896S003080	05/B03	0.95	SPAC2G11.08c	smn1; yab8	orthologue of the human SMN protein; involved in mRNA processing; involved in snRNP biogenesis; essential; no apparent Sc ortholog; overexpression results in increased growth rate; functionally complemented by overexpression of murine Smn
TI4896S000037	44/E07	0.95	SPCC330.08	arg11; gmd3	putative glycosyl transferaseglycosyl transferase family 1; possibly involved in N-linked oligosacchadride synthesis; involved in glycosylation of acid phosphatase; functionally complements Sc ALG11
TI4896S001239	12/A09	0.95	SPBC646.07c		steroid dehydrogenase; 3-oxo-5-alpha-steroid 4-dehydrogenase; similar to R. norvegicus synaptic glycoprotein sc2
TI4896S002485	21/H11	0.95	SPBC23E6.05		metallopeptidase; peptidase family M24; involved in ribosome biogenesis (predicted)
TI4896S001127	31/G01	0.95	SPBC839.13c	rpl1601; rpl16-1; rpl13a-1	60S ribosomal protein L13/L16; similar to Sp rpl1602 and rpl1603
TI4896S001862	32/D08	0.95	SPBC36B7.02		conserved hypothetical protein; similarity to NIFD/NIFK/NIFE/NIFN family
TI4896S001175	08/F02	0.95	SPBC577.03c		N-acetyltransferase; GCN5-related; GNAT family; no apparent Sc ortholog; non-essential
TI4896S003005	28/C03	0.95	SPAC1F3.10c		metallopeptidase activity; mitochondrial processing; peptidase family M3
TI4896S004926	52/A04	0.95	SPAC11E3.04c	ubc13; spu13	ubiquitin conjugating enzyme; involved in ubiquitination (lys63); involved in DNA repair; involved in DNA postreplication repair
TI4896S001420	33/G12	0.95	SPBC27B12.12c		metal ion transporter; MIT family; inorganic cation transporter
TI4896S004969	25/F04	0.94	SPAC3G6.06c	rad2; fen1	FEN-1 endonuclease; involved in Okazaki fragment processing; involved in DNA replication; involved in DNA repair; Uve1p dependent repair; XP-G family; deletion mutant hypersensitive to MMS; involved in telomere maintenance
TI4896S004001	05/D07	0.94	SPAC31G5.07		involved in conjugation
TI4896S002786	18/C09	0.94	SPAC1F8.06		Sp specific families; glycoprotein; serine-rich; similar to Sp SPAC8A4.02C and SPAC977.07C (paralogs)
TI4896S004039	01/B11	0.94	SPAC16A10.05c		DASH complex; microtubule-binding complex; involved in chromosome segregation; non essential
TI4896S001705	05/G11	0.94	SPBP23A10.16	sdh4	succinate dehydrogenase (ubiquinone) (cytochrome b small subunit); membrane anchor subunit; inner membrane translocase component; involved in mitochondrial electron transport, succinate to ubiquinone; involved in tricarboxylic acid cycle; involved in protein-membrane targeting; involved in protein-mitochondrial targeting; protein binding activity
TI4896S000483	30/D03	0.94	SPCC132.04c		glutamate dehydrogenase; involved in glutamate metabolism
TI4896S001214	22/A07	0.94	SPBC36.12c	git7; SPBC713.01c	glucose insensitive transcription; cyclic AMP (cAMP) signaling pathway component; essential; requirement appears to be due to roles in septation and cell wall integrity; involved in adenylate cyclase activation (required); mutants are sensitive to benomyl; CS domain; SGS domain; TPR repeat protein
TI4896S001993	37/C01	0.94	SPBC4F6.14		RNA-binding protein; ribonucleoprotein; rrm RNA recognition motif
TI4896S002209	49/E01	0.94	SPBC776.14	plh1	phospholipids diacylglycerol acyltransferase
TI4896S002480	30/C11	0.94	SPBC21C3.20c		C2 domain; similar to Sp SPAC11E3.02C
TI4896S004958	25/F11	0.94	SPAC4D7.08c	ade4; min13; aza1	amidophosphoribosyltransferase; glutamine phosphoribosylpyrophosphate amidotransferase; involved in purine biosynthesis; purine nucleotide de-novo biosynthetic pathway; involved in glutamate metabolism; expression not repressed by ade4
TI4896S003947	09/H05	0.94	SPAC8F11.05c		hypothetical protein; sequence orphan
TI4896S001336	34/G12	0.93	SPBC409.11	meu18	predicted coiled-coil; NLS; meiotic expression upregulated; no apparent orthologs
TI4896S003064	36/H12	0.93	SPAC4G8.12c		PMP protein; involved in GPI anchor biosynthesis (SGD); alpha-1,2 mannosyltransferase; involved in addition of the fourth, side-branching mannose onto the GPI core structure (SGD)
TI4896S002305	40/F03	0.93	SPBC4B4.08	ght2	hexose transporter; similar to Sp GHT1 and GHT3 and GHT4 and GHT5 and GHT6 and SPCC548.06C and SPBC1348.14C
TI4896S003485	37/E11	0.93	SPAC1002.05c		zinc finger protein; zf-C5HC2 type; jmjC domain; jmjN domain; DNA-binding protein; ARID DNA domain; similar to retinoblastoma binding proteins; involved in transcriptional regulation
TI4896S000024	43/G01	0.93	SPCC613.07		conserved hypothetical; zinc finger protein; zf-HIT
TI4896S004019	36/H02	0.93	SPAC24C9.01	cut11; SPAC1786.03	spindle pole body docking protein; essential; 7 predicted transmembrane helices
TI4896S002473	31/F02	0.93	SPBC21C3.13	rps1901; rps19-1	40S ribosomal protein (S19.1/S19A subunit)
TI4896S004250	10/F01	0.93	SPAC17G6.09	sec62	SRP receptor activity; involved in intracellular protein transport; involved in protein-ER targeting; involved in SRP-dependent cotranslational membrane targeting
TI4896S002893	09/D09	0.93	SPAC630.06c		hypothetical protein; sequence orphan
TI4896S000326	08/B08	0.93	SPCC16A11.05c	dim1	U4/U6.U5 snRNP; involved in mRNA splicing; essential; required for mitosis-possibly indirect
TI4896S005020	09/H08	0.93	SPAC186.05c		hypothetical protein; UPF0016 family; similar to Sp SPAC17G8.08C
TI4896S001889	38/C11	0.93	SPBC21D10.02	SPBC12C2.11	glucosamine-fructose-6-phosphate aminotransferase
TI4896S000612	15/A07	0.93	SPCC663.12	cid12	poly(A) polymerase
TI4896S004075	17/A04	0.93	SPAC3G9.09c	tif211	translation initiation factor (2 alpha subunit)
TI4896S001689	27/F03	0.93	SPBC1A4.09	SPBC1A4.09b	conserved protein
TI4896S005012	19/F07	0.93	SPAC869.04		formamidase-like protein; no apparent Sc ortholog
TI4896S002147	24/E11	0.92	SPBC30D10.17c		glucan synthase regulator; involved in beta-1,3 glucan biosynthesis; involved in cell wall organization and biogenesis; similar to N. crassa GS-1
TI4896S000535	16/B10	0.92	SPCC11E10.03		predicted coiled-coil region; involved in nuclear migration (sensu Fungi); involved in control of astral microtubules during mitotic growth
TI4896S004679	03/B12	0.92	SPAC1834.04	h3.1; hht1	histone H3; similar to Sp hht2 and hht3
TI4896S000349	05/C05	0.92	SPCC24B10.12		hypothetical protein; binding partner of SPAP27G11.07c (inferred)
TI4896S001135	34/G02	0.92	SPBC947.15c		NADH dehydrogenase
TI4896S000080	51/C12	0.92	SPCC794.02	wtf5; wtf4	wtf element
TI4896S004666	18/E04	0.92	SPAC144.09c	sfc2	zinc finger protein; 5S rRNA gene-specific transcription factor; RNA polymerase III transcription initiation factor TFIIIA; zf-C2H2 type (10)
TI4896S002199	24/F03	0.92	SPBC776.05		transporter; unknown specificity
TI4896S001148	27/F07	0.92	SPBC947.02	apl2	AP-1 adaptor complex subunit; adaptin family; involved in vesicle-mediated transport
TI4896S004630	26/A10	0.92	SPAC12B10.03		conserved hypothetical; WD repeat protein; no apparent Sc ortholog
TI4896S002093	08/E09	0.92	SPBC2A9.05c		hypothetical protein; Sc YDR084C is possibly involved in vesicular transport (2-hybrid)
TI4896S002192	38/F06	0.92	SPBC609.03		WD repeat protein
TI4896S004358	05/F10	0.92	SPAC926.03	rlc1	myosin regulatory light chain (type II); interacts physically with Myo2p; interacts physically with Myo3p; EF hand motifs; calcium binding protein; non-essential; involved in cytokinesis; involved in myosin regulation; involved in contractile ring assembly; non-essential; deletion mutant results in cell cleavage defects; deletion mutant results in aberrant F-actin rings; relieves auto-inhibition …
TI4896S002302	02/E05	0.92	SPBC4B4.05	smg1	small nuclear ribonucleoprotein; involved in mRNA splicing; complexed with Cdc5p
TI4896S002330	46/E05	0.92	SPBC1718.04		phosphate acyltransferase (SMART); involved in phospholipid biosynthesis; SCT1 is a suppressor of a choline transport mutant; similar to protein mutated in Barth syndrome
TI4896S004811	37/H03	0.92	SPAC1952.13	ned1	nuclear elongation and deformation protein; required for chromosome stability; required for normal nuclear morphology; conserved eukaryotic protein; functional homolog of Sc SMP2; homolog of mouse lpin; interacts physically with Pim1p (2-hybrid); interacts physically with Dis3p (2-hybrid); interacts physically with Nup189p (2-hybrid); interacts genetically with pim1; interacts genetically with sp…
TI4896S001384	21/B11	0.92	SPBC651.11c	apm2	AP adaptor complex; involved in vesicle-mediated transport
TI4896S001128	09/E10	0.92	SPBC839.14c		methyltransferase
TI4896S002843	15/A02	0.91	SPAC806.01	SPAC24B11.13	porphobilinogen deaminase (putative)
TI4896S001894	24/E05	0.91	SPBC12C2.06		DEAD/DEAH box helicase; ATP-dependent; RNA helicase; involved in mRNA expor
TI4896S004212	21/B05	0.91	SPAC16E8.06c		RNA-binding protein; rrm RNA recognition motif
TI4896S001549	06/G05	0.91	SPBC21B10.13c		transcriptional regulator; homeobox domain protein
TI4896S000757	09/H02	0.91	SPCC1739.08c		short chain dehydrogenase; involved in sorbitol utilization; similar to Sp SPAC22A12.17C and SPAC8E11.10; no apparent Sc ortholog
TI4896S003086	29/H11	0.91	SPAC2G11.14		transcription initiation factor TFIID subunit; zinc finger protein; zf-CCHC type (zinc knuckle)
TI4896S001913	31/E04	0.91	SPBC365.06	pmt3; ubl2; smt3	ubiquitin family protein; SUMO-1 family; required for chromosome segregation where it may be involved in microtubule assembly; loss of smt3 leads to an increase in telomere length.
TI4896S002274	11/C08	0.91	SPBC11C11.05		involved in cell wall biosynthesis
TI4896S002245	31/H02	0.91	SPBC25H2.01c	gar1; SPBC20F10.01	small nucleolar ribonucleoprotein complex; involved in rRNA processing; RNA-binding protein
TI4896S001583	32/F06	0.91	SPBC2F12.08c	ceg1; pce1	mRNA guanylyltransferase; involved in mRNA capping
TI4896S002467	16/H01	0.91	SPBC21C3.07c		methyltransferase
TI4896S004357	24/A04	0.91	SPAC926.02		hypothetical protein
TI4896S004543	12/B01	0.91	SPAC23D3.11		1-acyl dihydroxyacetone phosphate reductase
TI4896S002837	18/E10	0.91	SPAC24B11.08c		COPII-coated vesicle component; involved in intracellular protein transport; involved in ER to Golgi transport; predicted N-terminal signal sequence
TI4896S001323	28/G11	0.91	SPBC1709.15c		CFII component; involved in polyadenylation
TI4896S002257	10/E07	0.91	SPBC17D11.03c		hypothetical protein
TI4896S000137	21/C10	0.91	SPCC1682.12c	ubp16	ubiquitin C-terminal hydrolase activity
TI4896S002502	23/D10	0.91	SPBC1604.18c		SNF7 family; involved in intracellular protein transport; class E vps
TI4896S001144	24/C04	0.90	SPBC947.06c		unknown specificity; transporter; similar to SpSPAC11D3.05 and SPCC794.04C and SPCC569.05C and SPBC36.03C and SPBC36.01C and SPBC36.02C and SPBC530.02 and SPBC530.15c; involved in amine/polyamine transport; (old->MSF membrane transporter)
TI4896S004601	14/B01	0.90	SPAC1851.03	ckb1	casein kinase II (beta subunit)
TI4896S002353	02/E03	0.90	SPBC1105.17	cnp1; sim2	inner centromere protein; histone H3 variant; essential; involved in chromosome segregation (required)
TI4896S003611	18/E11	0.90	SPAC25A8.02		sequence orphan; hypothetical protein
TI4896S000368	07/H11	0.90	SPCC1795.10c		conserved hypothetical protein
TI4896S004077	45/F02	0.90	SPAC3G9.11c		pyruvate decarboxylase; similar to Sp SPAC13A11.06
TI4896S002292	40/D11	0.90	SPBC3B8.02	php5	CCAAT-box binding factor subunit; involved in growth on non-fermentable carbon sources (required); DNA-binding activity (required); histone fold; involved in the transcriptional activation (of cyc1) (required); histone-like transcription factor family
TI4896S002046	46/H06	0.90	SPBC19C7.11		ClC chloride channel predicted; similar to S. cerevisiae YJR040W
TI4896S002593	34/D01	0.89	SPBC56F2.04		similar to human DRIM, a protein differentially produced in metastatic and nonmetastatic human breast carcinoma cells
TI4896S000495	28/A07	0.89	SPCC338.07c		N-acetyltransferase; involved in protein amino acid acetylation; TPR repeat protein
TI4896S000053	27/D07	0.89	SPCC320.05		sulfate transporter
TI4896S000563	28/D05	0.89	SPCC584.05	sec1	sec1 family; SNARE binding activity; SNARE docking complex (TRAPP?); involved in non-selective vesicle docking; syntaxin binding protein; involved in intracellular protein transport; involved in secretory pathway; involved in exocytosis; involved in non-selective vesicle docking; involved in ER to golgi transport
TI4896S002566	19/H09	0.89	SPBC215.09c		acetyl-coA C-acetyltransferase activity; involved in ergosterol biosynthesis
TI4896S003722	36/D06	0.89	SPAC17G8.06c	ilv3	dihydroxy-acid dehydratase; involved in branched chain amino acid biosynthesis
TI4896S001104	36/G06	0.89	SPBC354.07c		oxysterol binding protein; involved in ergosterol biosynthesis; similar to Sp SPBC646.08c and SPBC1271.12 and SPCC23B6.01
TI4896S000032	42/E11	0.89	SPCC330.03c		hypothetical heme binding protein; cytochrome b5 family; heme-binding domain; similar to Sp SPAC1F12.10C (paralog)
TI4896S003297	22/F07	0.89	SPAC19E9.01c		nucleoporin; non-essential; Functions as a component of the nuclear pore complex (NPC); NPC components, collectively referred to as nucleoporins (NUPs), can play the role of both NPC structural components and of docking or interaction partners for transiently associated nuclear transport factors. Active directional transport is assured by both, a Phe-Gly (FG) repeat affinity gradient for these tr…
TI4896S004886	07/C08	0.89	SPAC26F1.06	gpm1	2,3-bisphosphoglycerate-dependent phosphoglycerate mutase activity
TI4896S003320	21/E11	0.89	SPAC3A12.01c	SPAC20G8.10c	involved in autophagy; beclin related
TI4896S003151	22/D08	0.89	SPAC821.05		eIF3 p40 eIF/signalosome component; MOV34 domain; no apparent Sc ortholog
TI4896S001481	50/F02	0.89	SPBP22H7.09c	pi022; SPACTOKYO_453.12	involved in chromosome segregation
TI4896S001088	17/B02	0.89	SPBC1685.11		involved in DNA repair; shares conserved SGKTE[LM]LYHL (possibly ATP/GTP binding motif) with human and mouse XRCC2 protein; non-essential; no apparent Sc ortholog
TI4896S001691	04/D09	0.89	SPBP23A10.02		hypothetical protein
TI4896S002423	27/E05	0.89	SPBC19F5.05c	SPBC25D12.01c	involved in ribosome biogenesis and assembly; pescadillo-family; BRCT domain
TI4896S002008	35/B03	0.89	SPBC336.09c	rrn7	RNA polymerase I transcription factor (subunit); interacts physically with Rrn11p
TI4896S000978	31/D01	0.88	SPBC800.04c	rpl4301; rpl43; rpl43-1; rpl37a-1	KOW motif
TI4896S000096	36/H01	0.88	SPCC553.09c		DNA polymerase alpha subunit
TI4896S002794	21/B09	0.88	SPAC11D3.06		MatE family transporter; unknown specificity; similar to Sp SPCC4B3.13 and SPAC323.07c
TI4896S002625	28/G04	0.88	SPBC342.02		glutaminyl-tRNA synthetase; involved in glutaminyl-tRNA aminoacylation; glutamine-tRNA ligase activity
TI4896S000794	20/B03	0.88	SPCC126.09		ZIP zinc transporter domain; involved in the regulation of zinc storage
TI4896S004356	04/C11	0.88	SPAC926.01c	stp1; SPAC1071.12c	low molecular weight phosphotyrosine protein
TI4896S001846	43/D03	0.88	SPBC19G7.02		aminotransferase class V
TI4896S004585	34/F06	0.88	SPAC17C9.16c	SPAC9E9.16	membrane transporter; unknown specificity; similar to Sp SPBC609.04 (paralog)
TI4896S000465	38/E06	0.88	SPCC1322.03		hypothetical protein
TI4896S004880	18/D03	0.88	SPAC26F1.12c		eukaryotic conserved protein; similar to human HMG1 and HMG2 proteins
TI4896S001550	40/A02	0.88	SPBC21B10.12	rec6	involved in meiotic recombination (required); no apparent orthologs
TI4896S002797	44/A01	0.88	SPAC11D3.09		arginase family protein.arginase family protein; agmatinase; no apparent Sc ortholog; similar to Sp SPAPB24D3.03 (paralog)
TI4896S002475	25/C10	0.88	SPBC21C3.15c		aldehyde-dehydrogenase-like
TI4896S003100	33/H05	0.87	SPAC23G3.08c	ubp7	ubiquitin C-terminal hydrolase activity
TI4896S003326	04/B11	0.87	SPAC3A12.07	rpb11	DNA-directed RNA polymerase II (subunit); involved in transcription from Pol II promoter; DNA-directed RNA polymerase activity (function of complex); DNA-binding activity; interacts physically with Rpb2p; interacts physically with Rpb3p
TI4896S003568	14/F11	0.87	SPAC17H9.05		P40-like; involved in rRNA processing; involved in ribosome biogenesis and assembly
TI4896S004057	08/F09	0.87	SPAC688.04c	gst3	glutathione S transferase
TI4896S000354	10/A11	0.87	SPCC24B10.17		emp24 family; COPII-coated vesicle component; predicted N-terminal signal sequence; 2 predicted transmembrane helices; involved in cargo sorting
TI4896S001523	35/C08	0.87	SPBC83.16c		conserved protein
TI4896S004184	06/F10	0.87	SPAC3A11.13	SPAC3H5.02	prefoldin (subunit 6)
TI4896S003668	13/A04	0.87	SPAC18G6.12c	B22918-1	Sp specific families; B22918 domain; hypothetical protein
TI4896S000114	29/F08	0.87	SPCC736.11		argonaute; involved in RNA interference; involved in PTGS; involved in the regulation of chromatin silencing at the centromere; involved in the regulation of histone L9 methylation; functions upstream of swi6; translation initiation factor eif-2c; Piwi domain; ZAP domain; deletion mutant results in lagging chromosomes at mitosis at reduced temperature (frequent); no apparent Sc ortholog
TI4896S004407	11/E07	0.87	SPAPJ698.02c	rps002; rps0-2; rpsa-2	40S ribosomal protein S0B
TI4896S003411	42/A01	0.87	SPAP27G11.13c		small nuclear ribonucleoprotein complex; involved in rRNA modification; involved in 35S primary transcript processing; direct rRNA pseudouridinylation
TI4896S000925	17/E05	0.87	SPBC359.02		alanine racemase; no apparent Sc ortholog
TI4896S001552	43/C02	0.87	SPBC21B10.10	rps402; rps4-2	40S ribosomal protein S4
TI4896S000141	06/C02	0.86	SPCC306.01	rpt4; SPCC1682.16	19S proteasome regulatory subunit; AAA family ATPase
TI4896S004766	16/D12	0.86	SPAC19B12.07c		conserved hypothetical; zinc finger protein; zf-C2H2 type
TI4896S001218	41/H10	0.86	SPBC713.05		conserved hypothetical; WD repeat protein; no apparent Sc ortholog
TI4896S003103	32/H08	0.86	SPAC23G3.11	rpn6	19S proteasome regulatory subunit
TI4896S003154	23/F01	0.86	SPAC821.08c	slp1	WD repeat protein; Cdc20/Fizzy family; spindle assembly checkpoint component; interacts physically with Mad2p; effector of the Mad2-dependent spindle checkpoint; involved in DNA; damage recovery (required); APC activator; interacts genetically with p34cdc2; synthetically lethal with cdc25; synthetically lethal with cdr1; synthetically lethal with cdr2
TI4896S000142	06/C08	0.86	SPCC306.02c		Rab GTPase binding; involved in vesicle-mediated transport (predicted) (S. cerevisiae 2-hybrid data)
TI4896S000317	25/C01	0.86	SPCC63.10c		dolichol kinase; involved in N-linked glycosylation
TI4896S001741	39/H09	0.86	SPBC23G7.05	psu1; sui1	protein translation factor Sui1; translation factor
TI4896S003602	47/H10	0.86	SPAC3C7.08c	elf1	AAA family ATPase; involved in mRNA export; non-essential; interacts genetically with rae1; interacts genetically with mex67; non-transporter with ATP binding cassette
TI4896S002371	26/D04	0.86	SPBC887.17		uracil permease; no apparent Sc ortholog
TI4896S000119	29/D11	0.86	SPCC594.01	SPCC736.16	sequence orphan; hypothetical protein
TI4896S003414	20/G11	0.86	SPAC343.01c		phosphomevalonate kinase
TI4896S003849	38/G12	0.86	SPAC7D4.03c		hypothetical protein; sequence orphan
TI4896S002408	25/D05	0.86	SPBP8B7.21	ubp3	ubiquitin C-terminal hydrolase activity
TI4896S003026	04/A07	0.86	SPAC22F3.07c		ATP synthase G chain
TI4896S003779	19/A06	0.86	SPAC19A8.06		conserved hypothetical; hypothetical protein; oxidoreductase
TI4896S002169	19/G08	0.85	SPBC1778.07		conserved hypothetical; methyltransferase
TI4896S000894	36/E03	0.85	SPCC1827.04		eukaryotic conserved protein; ankyrin repeat protein; zinc finger (inferred)
TI4896S000296	09/F06	0.85	SPCC1393.04		hypothetical protein; sequence orphan
TI4896S003597	40/C10	0.85	SPAC3C7.03c	rhp55	H-h-H (helix-hairpin-helix) (inferred from context); putative divergent AAA family ATPase; involved in DNA repair; involved in meiotic recombination; involved in meiotic gene conversion (required); deletion mutant sensitive to MMS; deletion mutant sensitive to IR; deletion mutant sensitive to UV; deletion mutant results in nuclear morphology defects (frequent); deletion mutant results in elongate…
TI4896S000853	05/E11	0.85	SPCC1840.11	SPCC965.01	exosome (RNase complex); cytoplasmic and nucleolar forms; S1 RNA binding domain
TI4896S003514	50/F07	0.85	SPAPB1A10.07c		hypothetical protein; TMS membrane protein/ tumour differentially expressed protein (TDE) domain
TI4896S004523	48/H03	0.85	SPAC27F1.01c	SPAC25G10.09c	actin cortical patch component; predicted coiled-coil region; EF hand motif; calcium binding protein; involved in actin cytoskeletal organization; involved in endocytosis; divergent repeat-containing; involved in actin cortical patch assembly; WH2 motif; similar to Sp SPBC800.10C and SPBC83.01; target of Ark1/Prk1 family kinases (potential)
TI4896S003901	11/A11	0.85	SPAC6F6.16c		sequence orphan; hypothetical protein
TI4896S001170	24/F11	0.85	SPBC119.14	rti1	involved in DNA repair; involved in double-strand break repair; essential; involved in S phase completion (required); similar to Sp rad22
TI4896S000156	42/G05	0.85	SPCC4G3.15c		CCR4-Not complex
TI4896S001507	47/F05	0.85	SPBC1215.02c		N-acetyltransferase complex (non catalytic subunit); interacts physically with SPCC16C4.12; actin-binding protein; involved in mitochondrial inheritance; involved in mitochondrial biogenesis; involved in actin cytoskeletal organization; involved in excluding cofilin from cytoplasmic actin cables; TPR repeat protein (inferred from context); involved in cell polarity
TI4896S001412	33/A01	0.85	SPBC27B12.05		conserved hypothetical protein; WD repeat protein
TI4896S003423	26/G12	0.85	SPAC343.10	met11; mthfr2	methylenetetrahydrofolate reductase; involved in methionine metabolism
TI4896S001711	35/A03	0.85	SPBC29A3.06		WD repeat protein; CGI-48 family
TI4896S002117	03/H12	0.85	SPBC2D10.19c		small hypothetical protein; confirmed by EST
TI4896S003120	46/D03	0.85	SPAC1687.10		hypothetical protein; sequence orphan; predicted coiled-coil
TI4896S003527	49/F07	0.85	SPAC110.01	SPAC140.05	putative 5'-AMP-activated protein kinase; serine/threonine protein kinase
TI4896S000827	17/C02	0.84	SPCC1919.02		protease B; involved in post-translational processing of protease
TI4896S001615	48/A04	0.84	SPBC18H10.16		putative membrane transporter; CCC Na-K-Cl transporter
TI4896S002845	02/E01	0.84	SPAC806.03c	rps2601; rps26; rps26-1	40S ribosomal protein S26
TI4896S002788	51/H03	0.84	SPAC1F8.08		hypothetical protein; sequence orphan
TI4896S002426	32/E12	0.84	SPBC25D12.04	suc22	ribonucleotide reductase; ribonucleotide-diphosphate reductase (small subunit); involved in DNA replication (required)
TI4896S001307	33/D03	0.84	SPBC1734.15	brd1	involved in transcriptional regulation; involved in chromatin remodeling; bromodomain protein; BHA domain
TI4896S001699	28/F03	0.84	SPBP23A10.10		serine/threonine protein kinase
TI4896S001827	27/D06	0.84	SPBC12D12.03	cct1	chaperonin-containing T-complex; chaperone; involved in protein folding
TI4896S001566	03/G05	0.84	SPBC19C2.06c		hypothetical protein; sequence orphan; has transcript profile on microarray
TI4896S005014	22/C04	0.84	SPAC869.02c		flavohemoprotein; involved in stress response
TI4896S001320	22/G09	0.84	SPBC1709.12		hypothetical protein; sequence orphan
TI4896S004371	34/H03	0.83	SPAC323.07c		MatE family transporter; unknown specificity; similar to Sp SPCC4B3.13 and SPAC11D3.06
TI4896S002246	36/E01	0.83	SPBC20F10.02c		eukaryotic conserved protein; similar to D. melanogaster CG8379; no apparent Sc ortholog
TI4896S000829	09/E09	0.83	SPCC1919.04		hypothetical protein; sequence orphan
TI4896S001593	42/D01	0.83	SPBC1D7.01		prefoldin (subunit 1)
TI4896S004917	38/F03	0.83	SPAPJ760.01c	SPAC14C4.15c	dipeptidyl aminopeptidase
TI4896S003469	07/C03	0.83	SPAC17A5.08		COPII-coated vesicle component; emp24-like; GOLD domain
TI4896S003819	50/E09	0.83	SPAC4A8.14	prs1	ribose-phosphate pyrophosphokinase
TI4896S004302	05/B07	0.83	SPAC15E1.07c		hypothetical protein; sequence orphan
TI4896S001067	07/F12	0.83	SPBC428.16c		small GTPase; Ras family; GTP-binding protein; essential
TI4896S000035	04/C12	0.83	SPCC330.06c	pmp20	peroxisomal membrane protein Pmp20p, Ahpc-TSA family
TI4896S000989	26/G05	0.83	SPBC1773.01		WD repeat protein; striatin; involved in cell cycle progression; human ortholog is expressed mainly in S and G phase; possibly binds calmodulin
TI4896S004602	47/H09	0.83	SPAC27D7.01c	SPAC1851.04c	sequence orphan; hypothetical protein
TI4896S003879	08/B12	0.82	SPAC644.18c	bet3	TRAPP; involved in intracellular protein transport; involved in ER to Golgi transport
TI4896S000863	25/D08	0.82	SPCC965.10		transcriptional regulator; zinc finger protein; zf-fungal Zn(2)-Cys(6) binuclear cluster domain
TI4896S000440	39/D01	0.82	SPCC550.14		hypothetical KH domain RNA-binding protein RNA-binding protein; KH domain; involved in control of mitotic chromosome transmission
TI4896S001078	10/H08	0.82	SPBC1685.01	pmp1	dual-specificity MAP kinase phosphatase; suppressor of calcineurin deficiency; involved in pheromone signalling; non-essential
TI4896S002814	10/B09	0.82	SPAC5H10.09c		3-methyl-2-oxobutanoate hydroxymethyltransferase; involved in pantothenate biosynthesis (first step); possibly coexpressed with SPAC5H10.08c which is also involved in pantothenate biosynthesis
TI4896S000722	20/H01	0.82	SPCC18.02		MFS amine transporter; no apparent Sc ortholog
TI4896S000630	27/C09	0.82	SPCC191.02c	SPCC417.14c	acetyl-coenzyme A synthetase; AMP binding domain
TI4896S002054	28/F11	0.82	SPBP4H10.02c	SPBC1346.03; SPBP19A11.07c	hypothetical protein; no apparent Sc ortholog; similar to Sp SPAP27G11.12 (paralog)
TI4896S004198	24/E09	0.82	SPAC328.02		zinc finger protein; zf-C3HC4 type (RING finger); ubiquitin ligase (E3); TRIAD composite zinc finger domain; Ariadne-2-like (which is a ubiquitin conjugating enzyme e2-binding protein); IBR domain
TI4896S000493	05/C06	0.82	SPCC338.10c	cox5	cytochrome c oxidase polypeptide V precursor
TI4896S002682	16/B02	0.82	SPBC16C6.04		sequence orphan; hypothetical protein
TI4896S004966	18/G08	0.81	SPAC3G6.03c		Maf-like protein; involved in cytokinesis; involved in septum formation (regulation) (negative); involved in septation
TI4896S003785	04/H12	0.81	SPAC23H3.02c		transcription-splicing co-factor; RING finger-like protein; involved in G2/M phase transition (required); eukaryotic conserved protein; Sc YPR094W is null lethal; UPF0123 domain
TI4896S003337	25/H07	0.81	SPAC9.01	zwf1; SPAC3A12.18	glucose-6-phosphate 1-dehydrogenase; involved in pentose-phosphate shunt, oxidative branch (1st step); involved in glutathione metabolism; involved in glucose 6-phosphate utilization; glucose-6-phosphate 1-dehydrogenase activity; similar to Sp SPAC3C7.13C and SPCC794.01C
TI4896S005034	41/B07	0.81	SPAC212.02		sequence orphan; hypothetical protein; telomeric duplication; has transcript profile on microarray
TI4896S004102	04/A03	0.81	SPAC6G10.11c	ubi3	ubiquitin family protein; nuclear protein; overexpression results in cell cycle defects
TI4896S000678	25/F07	0.81	SPCC285.09c	cgs2; pde1	3',5'-cyclic-nucleotide phosphodiesterase; cAMP phosphodiesterase class II
TI4896S000386	26/D11	0.81	SPCC825.02		similar to human alpha glucosidase II beta subunit; putative protein kinase C substrate; EF hand (inferred from context); putative LDL receptor
TI4896S000953	25/G05	0.81	SPBC1198.11c	reb1; SPBC660.01c	DNA binding termination factor for RNA polymerase I transcription; Myb family; DNA binding protein; sequence specific recognition site AGGTAAGGGTAATGCAC in the rDNA intergenic spacer; similar to Sp SPAC22F8.07c
TI4896S001776	40/D10	0.81	SPBC17G9.09	tif213	translation initiation factor 2 (gamma subunit)
TI4896S003334	28/B07	0.81	SPAC3A12.15	vps53	involved in intracellular protein transport; involved in vacuolar sorting; GARP complex; involved in protein sorting in the late Golgi; involved in retrograde transport from the prevacuole; involved in docking at the trans-Golgi network; similar to S. cerevisiae YJL029C
TI4896S001329	09/G06	0.81	SPBC409.04c	mis12	inner centromere protein; involved in chromosome segregation (required); involved in centromere structure (maintenance) (required)
TI4896S003069	24/B11	0.81	SPAC16C9.03		involved in mRNA catabolism, nonsense-mediated
TI4896S004996	22/A09	0.80	SPAC1039.08		probable serine acetyltransferase; no Sc ortholog
TI4896S003553	37/F11	0.80	SPAC9G1.05		WD repeat protein; actin cortical patch component; involved in stress response
TI4896S001796	45/A07	0.80	SPBC14C8.15		triglyceride lipase-cholesterol esterase; similar to Sp SPCC1672.09 and SPBC16A3.12C (paralogs)
TI4896S003576	21/G06	0.80	SPAC17H9.13c		glutamate 5-kinase; PUA domain
TI4896S000202	05/B09	0.80	SPCC962.04	rps1201; rps12; rps12-1	40S ribosomal protein S12
TI4896S004731	04/G11	0.80	SPAC22F8.12c		hypothetical protein; serine-rich protein; sequence orphan
TI4896S001814	33/F07	0.80	SPBC16H5.11c	skb1	protein methyltransferase; interacts physically with Shk1p; interacts physically with Orb6p; involved in the regulation of cell morphogenesis; involved in the regulation of mitosis (negative); involved in osmotic stress
TI4896S000146	14/F02	0.80	SPCC306.06c		possibly involved in cell wall maintenance; possibly involved in maintaining beta,-1,6-glucan levels
TI4896S000108	13/G05	0.80	SPCC736.05	wtf7	wtf element
TI4896S002588	19/H10	0.79	SPBC56F2.09c	arg5	carbamoyl-phosphate synthase; arginine specific; involved in arginine biosynthesis; involved in glutamate catabolism; carbamoyl-phosphate synthase (glutamine-hydrolysing) activity
TI4896S002312	04/D01	0.79	SPBC2G2.03c		translocon; involved in protein-ER targeting
TI4896S003325	46/G06	0.79	SPAC3A12.06c		putative membrane transport protein; CaCA sodium/calcium exchanger
TI4896S003296	28/A11	0.79	SPAC6F12.17		HAT repeat protein (SMART); involved in polyadenylation; involved in 3' end maturation
TI4896S000738	23/D04	0.79	SPCC290.01c	fum1; SPCC18.18c	fumarate hydratase (predicted); involved in fumarate metabolism and TCA cycle
TI4896S001921	22/F08	0.79	SPBC365.14c		UDP glucose NAD dependant epimerase/dehydratase
TI4896S001728	14/F06	0.79	SPBC18E5.05c		conserved hypothetical protein
TI4896S003793	24/E03	0.79	SPAC23H3.10		involved in chromatin remodeling; involved in transcriptional regulation; zinc finger protein; zf-ZZ type; Myb family; DNA-binding protein; �iold->SWI/SNF complex transcriptional regulator)
TI4896S000346	04/C01	0.79	SPCC24B10.09	rps1702; rps17; rps17-2	40S ribosomal protein S17
TI4896S001068	26/E06	0.79	SPBC428.17c		hypothetical serine-rich protein; sequence orphan; non-essential
TI4896S001543	12/D03	0.79	SPBC28F2.07		experimentally characterised; involved in DNA repair; involved in double strand break repair (AY275538); involved in recombination repair (AB089500); predicted coiled-coil; no apparent orthologs
TI4896S000537	35/F03	0.79	SPCC11E10.05c		nucleoside diphosphatase; similar to S. cerevisiae YER005W; 1 predicted transmembrane helix; predicted N-terminal signal sequence; non-essential; double mutant gda1delta/ynd1delta lethal
TI4896S005011	29/B12	0.79	SPAC869.05c		sulfate transporter; similar to Sp SPBC3H7.02 (paralog)
TI4896S004985	05/C04	0.79	SPAC29B12.11c		putative orthologue of human WW domain binding protein-2
TI4896S004246	28/D03	0.78	SPAC17G6.05c		endosome associated protein; involved in intracellular protein transport; involved in signal transduction; BRO1-like domain
TI4896S002444	04/E10	0.78	SPBC31F10.02		thioesterase superfamily protein; human homolog is a novel candidate oncogene MCT-1 involved in cell cycle progression and; has multiple copies in T-cell malignancies; potential destruction box (D-box); non-essential
TI4896S001700	24/G03	0.78	SPBP23A10.11c		serine-rich protein
TI4896S000168	15/H02	0.78	SPCC4G3.03		WD repeat protein; apoptotic protease activating factor, by low similarity to human spaf1 (conserved residues)
TI4896S000453	24/E08	0.78	SPCC645.10		tRNA nucleotidyltransferase
TI4896S004944	08/A02	0.78	SPAP8A3.08	cdc4	EF hand motifs; essential; calcium binding protein; essential; involved in cytokinesis (required); involved in septation (required); involved in contractile ring assembly (required); actin cap component (putative); involved in cell polarity; myosin light chain; interacts physically with a phosphatidylinositol 4-kinase; interacts physically with IQ-domain containing proteins
TI4896S000341	06/F09	0.78	SPCC24B10.04		hypothetical protein; sequence orphan
TI4896S004788	20/D03	0.78	SPAC1B3.08		PINT/PCI domain (inferred from context); IQ domain (inferred from context)
TI4896S002272	27/B05	0.78	SPBC11C11.03	ndc10; tid3	involved in chromosome segregation; predicted coiled-coil regions; spindle pole body protein
TI4896S004251	25/E05	0.78	SPAC17G6.10		Myb family; DNA binding protein; involved in transcriptional regulation; involved in chromatin remodeling
TI4896S001202	25/B05	0.78	SPBC661.01	SPBC530.15c	phosphatidylserine decarboxylase; involved in phosphatidylcholine biosynthesis; phosphatidylserine decarboxylase activity; localization mitochondrial inner membrane; similar to Sp SPBC16E9.18
TI4896S004904	30/C03	0.77	SPAC14C4.02c	spr18	SMC family protein; possibly dimerizes with rad18
TI4896S003168	46/C04	0.77	SPAC23C4.02	crn1	yeast coronin CRN1 homolog; WD repeat protein; coronin family; involved in actin cytoskeletal organization; actin-binding protein; actin cortical patch component
TI4896S002141	10/F04	0.77	SPBC13E7.07		hypothetical protein; sequence orphan
TI4896S002127	03/C10	0.77	SPBC15D4.08c		hypothetical coiled-coil protein
TI4896S004395	26/A07	0.77	SPAC27E2.01		alpha-amylase; no apparent Sc ortholog
TI4896S002730	50/D02	0.77	SPBPB2B2.02		hypothetical protein; esterase/lipase
TI4896S004208	09/C04	0.77	SPAC16E8.02		conserved hypothetical protein
TI4896S000818	37/H06	0.77	SPCC830.05c		histone acetyltransferase complex
TI4896S001315	17/E04	0.77	SPBC1709.07		3-keto sterol reductase; involved in ergosterol biosynthesis
TI4896S004889	22/C01	0.77	SPAC26F1.03	pda1	pyruvate dehydrogenase e1 component (alpha subunit); involved in acetyl-CoA biosynthesis from pyruvate; pyruvate dehydrogenase (lipoamide) activity
TI4896S000205	19/C08	0.77	SPCC1672.01		histidinol-phosphatase; involved in histidine metabolism
TI4896S004400	23/B11	0.77	SPAC27E2.05	cdc1; mis1	DNA polymerase delta (small subunit); interacts physically with Cdc27p; interacts physically with Pol3p; involved in DNA replication (required); involved in cell cycle progression (required); involved in telomere maintenance
TI4896S002380	34/B09	0.77	SPBC16D10.05	mok13	a-1,3-glucan synthase; alpha glucan synthase; glycosyl transferase family 1; similar to Sp MOK1 and MOK11 and MOK14 and MOK12; involved in cell wall biosynthesis; no apparent Sc ortholog
TI4896S001124	37/H02	0.76	SPBC839.10		hypothetical protein; RNA recognition motif; PWI domain
TI4896S001899	34/A11	0.76	SPBC12C2.02c	ste16	WD repeat protein; involved in conjugation (required); involved in meiosis (required); regulates cell cycle progression under starvation through Rum1p
TI4896S004367	26/C09	0.76	SPAC323.03c		sequence orphan; hypothetical protein
TI4896S004050	41/C05	0.76	SPAC589.08c		DASH complex; microtubule-binding complex
TI4896S003123	16/E01	0.76	SPAC1687.13c	csn5	COP9/signalosome complex (subunit 5); MOV34 domain; involved in deneddylation
TI4896S001896	18/C03	0.76	SPBC12C2.04		conserved hypothetical; dehydrogenase; conserved in bacteria; no apparent Sc ortholog; similar to Sp SPACUNK4.17 (paralog)
TI4896S004213	28/H06	0.76	SPAC16E8.07c	vph1	vacuolar ATP synthase subunit; V-type ATPase subunit; vacuolar proton pump component; V0 sector
TI4896S001182	09/H09	0.76	SPBC577.10		20S proteasome component (beta 7)
TI4896S000467	36/G11	0.76	SPCC1322.05c		leukotriene A-4 hydrolase
TI4896S003384	28/D10	0.76	SPAC23H4.15		involved in RNA processing; involved in RNA modification
TI4896S002810	06/E01	0.76	SPAC5H10.05c		NADHdh_2 domain protein; no apparent Sc ortholog
TI4896S003249	10/C08	0.76	SPAC10F6.05c	ubc6	ubiquitin conjugating enzyme
TI4896S004637	50/E08	0.76	SPAC12B10.10		hypothetical protein; sequence orphan; predicted coiled-coil region
TI4896S000980	12/A08	0.76	SPBC800.06		eukaryotic conserved protein; Brix domain; involved in RNA processing; RNA-binding protein; involved in ribosome biogenesis and assembly
TI4896S002594	18/A11	0.76	SPBC56F2.03		actin-like protein
TI4896S002499	48/A09	0.76	SPBC211.09	ptr3; uba1; SPBC1604.21c	ubiquitin-activating enzyme e1; involved in mRNA transport; poly(a)+ RNA transport protein
TI4896S004074	11/B09	0.76	SPAC3G9.08	png1	zinc finger protein; zf-PHD finger; involved in transcriptional regulation; histone acetyltransferase complex; shares significant sequence identity with the human candidate tumour suppressor p33 (ING1) in their C-terminal regions; involved in chromatin mediated transcriptional regulation; divergent orientation to hda1-may share regulatory region
TI4896S002716	16/C04	0.75	SPBC1289.12		conserved hypothetical; RNA-binding protein; rrm RNA recognition motif; mre2??
TI4896S001322	19/C09	0.75	SPBC1709.14		peptide N-glycanase; involved in deglycosylation; involved in proteasome-dependent pathway
TI4896S001382	36/C08	0.75	SPBC651.09c		RNA polymerase II associated Paf1 complex; involved in TATA site selection; involved in regulation of transcription elongation
TI4896S003118	01/D03	0.75	SPAC1687.08		very hypothetical protein; sequence orphan
TI4896S001979	08/H11	0.75	SPBC3E7.13c		involved in mRNA splicing; complexed with Cdc5p
TI4896S000628	25/C02	0.75	SPCC417.12		carboxylesterase-lipase family; no apparent Sc ortholog
TI4896S004947	23/A02	0.75	SPAP8A3.11c		GTP1/OBG family; GTP-binding protein
TI4896S000183	04/B07	0.75	SPCC970.05	rpl3601; rpl36-1	60S ribosomal protein L36.1/L36A
TI4896S004306	26/C07	0.75	SPAP7G5.02c		GMP synthase [glutamine-hydrolyzing]; involved in purine biosynthesis; involved in guanine biosynthesis
TI4896S004383	47/C10	0.75	SPAC2F3.10		GARP complex; involved in protein sorting in the late Golgi; involved in retrograde transport from the prevacuole; involved in docking at the trans-Golgi network; zf-C2H2 type; zinc finger protein (inferred from context); involved in actin cytoskeletal organization; similar to S. cerevisiae YDR027C
TI4896S003741	26/E02	0.75	SPAC22H10.11c		conserved hypothetical; fungal conserved protein
TI4896S002551	31/F01	0.75	SPBC3B9.13c	rpa1-2; rpaP1-3; rpa3	60s acidic ribosomal protein; similar to Sp rpp101 and rpp103 (paralogs)
TI4896S000687	46/G09	0.75	SPCC1223.01	SPCC285.18	zinc finger protein; zf-C2H2 type; zf-C3HC4 type (RING finger); ubiquitin ligase (E3)
TI4896S000081	34/H07	0.75	SPCC794.03		amino acid permease family; similar to Sp SPBC15C4.04C and SPAPB24D3.02C and SPCC74.04 and SPAC1039.01 and SPAC11D3.08C and SPCC584.13 and SPAC9.10 and SPCC794.03
TI4896S001640	10/G07	0.75	SPBC3H7.10		hypothetical protein; conserved in human, D. melanogaster, mouse; no apparent Sc ortholog
TI4896S000097	30/A08	0.75	SPCC553.08c		translation elongation factor
TI4896S003382	16/C01	0.75	SPAC23H4.17c		serine/threonine protein kinase; cyclin C-dependent kinase; RNA polymerase II holoenzyme component
TI4896S002146	32/A12	0.75	SPBC30D10.18c	rpl102; rpl1-2; rpl10a-2	60S ribosomal protein L10
TI4896S001390	31/D07	0.75	SPBC3D6.15	rps2501; rps25-1	40S ribosomal protein S25
TI4896S002016	21/B02	0.75	SPBC685.03		hypothetical serine-rich protein
TI4896S003876	04/C05	0.75	SPAC644.15	rpp1-1; rpa1	60S acidic ribosomal protein p1-alpha
TI4896S000315	14/E11	0.75	SPCC63.07		conserved hypothetical; conserved protein
TI4896S002304	11/E01	0.74	SPBC4B4.07c		small nuclear ribonucleoprotein U1-A; involved in mRNA splicing; RNA-binding protein; RRM RNA recognition motif
TI4896S002018	42/G06	0.74	SPBC685.05		phosphatidylinositol N-acetylglucosaminyltransferase subunit H; involved in phosphatidylinositol-glycan biosynthesis; glycosylphosphatidylinositol anchor
TI4896S004821	36/B04	0.74	SPAC890.07c		arginine N-methyltransferase activity; involved in regulation of RNA-nucleus export; involved in nuclear export
TI4896S001608	23/A06	0.74	SPBC18H10.09		hypothetical protein; zinc finger protein; no apparent orthologs
TI4896S000128	46/B07	0.74	SPCC1682.03c		hypothetical ser-rich protein hypothetical protein; sequence orphan
TI4896S001331	16/B04	0.74	SPBC409.06	uch2	ubiquitin C-terminal hydrolase activity; involved in protein deubiquitination; similar to Sp uch1 (paralog)
TI4896S002533	34/A05	0.74	SPBC26H8.10	dis3	involved in the regulation of mitosis; involved in anaphase (required); exosome (RNase complex); 3'-5' exoribonuclease; involved in rRNA processing; essential; RNB domain; ribonuclease family signature; possibly binds directly to Ran and enhances the GEF activity of SPAC10F6.04 (check)
TI4896S004981	11/B12	0.74	SPAC29B12.06c	rcd1	RNA-binding protein; involved in nitrogen starvation-induced sexual development (required); negatively regulates differentiation
TI4896S004809	29/B03	0.74	SPAC1952.11c	ure2	experimentally characterised; urease; no apparent Sc ortholog
TI4896S003460	46/E11	0.74	SPAC105.03c		putative transcriptional activator; possible activator for allantoin, 4-aminobutyric acid (GABA), and urea catabolic genes; zinc finger protein (201others); zf-fungal Zn(2)-Cys(6) binuclear cluster domain; similar to Sp SPAC25B8.11 (paralog)
TI4896S002278	32/B03	0.74	SPBC11C11.08	srp1	RNA-binding protein; involved in mRNA splicing; no apparent Sc ortholog; rrm RNA recognition motif
TI4896S003112	11/F05	0.74	SPAC1687.02		CAAX prenyl protease; involved in the proteolytic maturation of farnesylated proteins; peptidase family U48
TI4896S001069	20/F09	0.74	SPBC428.18	cdt1	involved in DNA replication (initiation) (required); regulated by DSC1/MBF complex; essential; involved in DNA replication (required); involved in mitosis (inhibition) (required); no apparent Sc ortholog; expressed at G1-S phase; regulated by DSC1/MBF complex
TI4896S003476	37/E12	0.74	SPAC17A5.15c		glutamate-tRNA ligase; involved in glutamyl-tRNA aminoacylation; glutamate-tRNA ligase
TI4896S002078	28/C06	0.74	SPBC1703.04	mlh1	mutL homolog; involved in DNA repair; involved in mismatch repair
TI4896S003715	11/A06	0.74	SPAC6C3.08		ankyrin repeat protein; proteasome regulatory particle (sensu Eukarya); involved in proteolysis and peptidolysis
TI4896S005005	35/H10	0.74	SPAC922.08c	SPAC869.11	APC amino acid transporter (putative); similar to Sp SPBC359.01C and SPBC359.03C and SPAP7G5.06 and SPBPB2B2.01 and ISP5(paralog); closely related paralogous family; amino acid permease family; similar to Sp SPAP7G5.06 and SPBC359.01 and meu22 and SPBPB2B2.01 and isp5
TI4896S003426	51/G12	0.73	SPAC343.20		hypothetical protein; sequence orphan; has transcript profile on microarray
TI4896S000764	51/D06	0.73	SPCC1739.15	wtf21; wtf3	wtf element; no apparent orthologs
TI4896S004566	17/A08	0.73	SPAC16.03c	ura2	dihydroorotase; involved in pyrimidine nucleotide biosynthesis; dihydroorotase activity
TI4896S003488	17/C03	0.73	SPAC1002.08c		RNA polymerase specificity factor
TI4896S004749	15/A10	0.73	SPAC4F10.10c		mannosyltransferase complex; involved in N-linked glycosylation
TI4896S001038	13/E11	0.73	SPBC106.16		20S proteasome component (alpha 4); involved in ubiquitin-dependent proteolysis; proteasome endopeptidase activity
TI4896S002496	45/F10	0.73	SPBC211.06		gamma tubulin complex subunit; non-essential; GRIP domain; similar to human GPC4; no apparent S. cerevisiae ortholog
TI4896S004089	03/F07	0.73	SPAC1486.07c	rpl11-3	mitochondrial ribosomal protein L11
TI4896S002076	28/F01	0.73	SPBC1703.02		chromatin remodeling complex; DNA binding activity; ARID DNA-binding domain
TI4896S001415	34/B08	0.73	SPBC27B12.08		conserved hypothetical; HEAT repeat (inferred from context)
TI4896S000755	24/A12	0.73	SPCC1739.06c		uroporphyrin methyltransferase
TI4896S001372	08/E05	0.73	SPBC725.17c		RNA polymerase I component
TI4896S004806	07/D08	0.73	SPAC1952.08c		conserved hypothetical protein; possibly involved in RNA processing from Sc 2-hybrid data
TI4896S000307	01/D02	0.73	SPCC2H8.03		very hypothetical protein
TI4896S003186	16/H04	0.73	SPAC1A6.02	SPAC23C4.21	WD repeat protein; involved in mRNA splicing
TI4896S004315	31/F12	0.73	SPAC1556.04c	pcd1	cytidine deaminase
TI4896S000230	06/E04	0.73	SPCC31H12.04c	rpl1202; rpl12-2	60S ribosomal protein L12
TI4896S003209	47/F07	0.72	SPAC30D11.01c	SPAC56F8.01	alpha-glucosidase; glycosyl hydrolase family 31; similar to Sp agl1 and SPAC922.02c
TI4896S004095	16/H06	0.72	SPAC6G10.04c		20S proteasome subunit (alpha 6)
TI4896S004364	34/C03	0.72	SPAC926.09c	fas1	fatty acid synthase (subunit beta)
TI4896S000528	26/F03	0.72	SPCC622.20c	SPCC61.01c	membrane transporter; siderochrome-iron transporter activity; involved in iron-siderochrome transport; involved in iron homeostasis; similar to Sp SPBC4F6.09 and SPAC1F8.03c
TI4896S004974	38/G11	0.72	SPAC3G6.11		DEAD box helicase
TI4896S003577	16/G04	0.72	SPAC17H9.14c		protein disulfide isomerase
TI4896S004076	12/A06	0.72	SPAC3G9.10c		exosome (RNase complex); involved in rRNA processing; involved in mRNA processing; involved in mRNA cleavage; possibly confers antiviral activity by protecting cells from double-stranded RNA (dsRNA) viruses; ribonuclease PH-like
TI4896S000864	25/H04	0.72	SPCC965.11c		amino acid transporter
TI4896S002548	16/E08	0.72	SPBC3B9.10	vti1	SNARE; involved in secretory pathway; involved in vacuole fusion
TI4896S000302	11/G05	0.72	SPCC1393.10	ctr4	high affinity copper transporter
TI4896S003343	34/E01	0.72	SPAC9.07c		GTP-binding protein; TGS domain; GTP1/OBG family
TI4896S004671	45/C05	0.72	SPAC144.14	klp8	kinesin-like protein
TI4896S004162	24/G07	0.72	SPAC8E11.01c	SPAC959.01	glycosyl hydrolase family 32; invertase
TI4896S000698	20/A01	0.72	SPCC1223.12c	meu10	involved in cell wall biosynthesis; meiotic expression upregulated; involved in spore wall assembly (required); similar to Sp SPAC1705.03c; GPI anchored protein (pers. comm. Birgit Eisenhaber)
TI4896S001662	17/H08	0.72	SPBC16E9.05		delta-sterol c-methyltransferase; involved in ergosterol biosynthesis
TI4896S001938	51/E07	0.72	SPBC29A10.15	orc1; orp1	origin recognition complex (subunit 1); involved in S phase checkpoint (required); AT hook protein; AAA family ATPase; BAH domain; Cdc18/Cdc6 family of S-phase regulators
TI4896S002394	45/D08	0.72	SPBP8B7.07c		zinc finger protein; zf-MYND type; SET domain; histone lysine methyltransferase; no apparent Sc ortholog
TI4896S004409	46/H03	0.71	SPAC19G12.01c	cut20; lid1; SPAPJ698.04c	cyclosome/apc subunit; Cut20/Apc4 anaphase-promoting complex (APC); cyclosome; WD repeat protein (putative); involved in metaphase-anaphase transition (regulation)
TI4896S001816	20/B07	0.71	SPBC16H5.09c		glycosyl transferase family 15; similar to S. pombe SPCC777.07 and SPBC19C7.12c; similar to S. cerevisiae YOR099W and YKR061W and YJL139C and YDR483W and YBR205W and YBR199W and YPL053C; conserved fungal protein
TI4896S000914	19/A04	0.71	SPCC569.03		Sp specific families; B13958 domain; predicted coiled-coil
TI4896S001203	45/G02	0.71	SPBC36.01c		unknown specificity; transporter; similar to Sp SPAC11D3.05 and SPCC794.04C and SPCC569.05C and SPBC36.03C and SPBC530.15C and SPBC36.02C and SPBC530.02 and SPBC947.06C; tandem duplication; involved in amine/polyamine transport
TI4896S001918	10/B06	0.71	SPBC365.11		GRIP domain; possibly targeted to the golgi
TI4896S000926	45/F12	0.71	SPBC359.03c		amino acid permease
TI4896S004324	06/B08	0.71	SPAC1F12.04c		hypothetical protein; sequence orphan
TI4896S002740	49/D07	0.71	SPBPB2B2.12c		bifunctional enzyme; UDP-glucose 4-epimerase; aldose 1-epimerase
TI4896S004497	23/B01	0.71	SPAC21E11.06	tif224	translation initiation factor eIF-2B delta
TI4896S002195	39/G02	0.71	SPBC776.01	rpl29	60S ribosomal protein L29
TI4896S003290	23/H02	0.71	SPAC6F12.11c	sfc1	RNA polymerase III transcription factor (TFIIIC subunit); A box associated binding subunit
TI4896S004354	39/A12	0.71	SPAC1071.10c	pma1	plasma membrane ATPase 1 (EC 3.6.1.35) P-type proton ATPase; P3 type
TI4896S001995	21/G03	0.71	SPBC4F6.16c		oxidase; FAD dependent; involved in protein folding; involved in protein disulfide bond formation
TI4896S002776	50/C02	0.71	SPAC977.14c		putative oxidoreductase; Aldo/keto reductase; telomeric duplication; similar to Sp SPAC750.01 (pseudo)
TI4896S003236	42/B07	0.71	SPAC22A12.13		human downs syndrome critical region-like
TI4896S004361	36/H08	0.71	SPAC926.06c		leucine-rich repeat protein
TI4896S000006	19/D05	0.71	SPCC757.02c		conserved hypothetical protein; conserved in A. thaliana; no apparent Sc ortholog
TI4896S002782	42/H09	0.71	SPAC1F8.02c		exoglucanase I precursor glycoprotein; possibly Sp specific; GPI anchored protein (pers. comm. Birgit Eisenhaber); no apparent Sc ortholog
TI4896S003463	40/F04	0.71	SPAC17A5.02c	dbr1	RNA lariat debranching enzyme; involved in mRNA splicing; involved in mRNA stability; required for intronic snoRNA biosynthesis; functionally complemented by human DRB1
TI4896S000795	09/A02	0.70	SPCC126.10	iah1	isoamyl acetate hydrolytic enzyme
TI4896S001022	19/A02	0.70	SPBC1271.01c	pof13	F-box protein; non-essential
TI4896S001996	28/F09	0.70	SPBC4F6.17c		AAA family ATPase; chaperone activit; involved in protein folding; involved in response to stress
TI4896S002940	23/D11	0.70	SPAC24H6.04	hxk1	hexokinase 1
TI4896S003961	22/H01	0.70	SPACUNK4.10		2-hydroxyacid dehydrogenase
TI4896S002418	42/G11	0.70	SPBP8B7.31		magnesium dependent phosphatase (putative)
TI4896S004286	13/F06	0.70	SPAC15A10.05c		conserved hypothetical; hypothetical protein; YjeF domain
TI4896S003099	32/B10	0.70	SPAC23G3.07c		hypothetical protein; sequence orphan
TI4896S001557	40/B09	0.70	SPBC21B10.05c	pop3; wat1	WD repeat protein; involved in peroxisomal targeting; involved in genome stability; involved in microtubule cytoskeleton organization and biogenesis; involved in mRNA processing; TOR signaling pathway
TI4896S002425	33/G03	0.70	SPBC25D12.03c	mcm7	MCM complex subunit; involved in DNA replication (initiation) (required); essential
TI4896S002339	07/D11	0.70	SPBC1105.03c		mitochondrial ribosomal protein L16
TI4896S001051	29/C11	0.70	SPBC582.10c		DEAD/DEAH box helicase; involved in nucleotide-excision repair; involved in DNA repair; SNF2 familyhelicase; C-terminal domain; non-essential
TI4896S000123	20/D08	0.70	SPCC594.05c		SET1 complex (TAP); zinc finger protein; zf-PHD finger; involved in transcriptional silencing; involved in regulation of chromatin remodelling; non-essential; involved in H3 K4 methylation (required); involved in transcriptional regulation
TI4896S001132	17/D09	0.70	SPBC115.03	SPBC839.18c	oxidoreductase; similar to Sp SPAC26H5.09C
TI4896S003522	50/C04	0.70	SPAPB1A10.15		Arv1-like family protein; similar to S. cerevisiae YLR242C; 4 predicted transmembrane helices; involved in sterol uptake; involved in sterol distribution; involved in G1/S and G2/M phase transition (Q9H2C2); involved in sphingolipid metabolism
TI4896S002968	18/H06	0.70	SPAC2F7.05c		translation initiation factor (eIF5 subunit)
TI4896S003010	19/C12	0.69	SPAC1D4.05c		ER lumen protein retaining receptor activity; involved in protein-ER retention
TI4896S004763	01/B04	0.69	SPAC19B12.04	rps3001; rps30-1	40S ribosomal protein S30
TI4896S002701	21/F09	0.69	SPBC1539.07c		glutathione dependent formaldehyde dehydrogenase; similar to Sp SPCC13B11.04
TI4896S003187	26/D01	0.69	SPAC1A6.03c		lysophospholipase; similar to Sp SPAC1A6.04C and SPBC1348.10C SPAC977.09C and SPCC1450.09C and SPAC1786.02; tandem duplication; GPI anchored protein (pers. comm. Birgit Eisenhaber)
TI4896S005001	02/C10	0.69	SPAC922.04		hypothetical protein; sequence orphan; has transcript
TI4896S004869	35/A02	0.69	SPAC29A4.10		upstream activation factor complex; RNA polymerase I transcription factor; Myb family; DNA-binding protein
TI4896S000066	11/D08	0.69	SPCC1235.11		conserved hypothetical protein
TI4896S004254	22/F04	0.69	SPAC17G6.13	slt1	involved in caffeine resisitance; no apparent orthologs
TI4896S000485	02/D02	0.69	SPCC338.18		hypothetical protein; sequence orphan
TI4896S000031	35/H08	0.69	SPCC330.02	SPCC613.14	leucine-rich repeat protein; involved in DNA repair and nucleotide-excision repair
TI4896S003934	18/F10	0.69	SPAC3F10.09		1-(5-phosphoribosyl)-5-[(5-phosphoribosylamino)methylideneamino]imidazole-4-carboxamide isomerase activity; involved in histidine biosynthesis (4th step)
TI4896S004957	45/H08	0.69	SPAC4D7.07c		sequence orphan; hypothetical protein
TI4896S003851	35/F10	0.69	SPAC7D4.01	itr1; SPAC4F8.15	myo-inositol transporter; similar to Sp itr2 (paralog); involved in conjugation (required) and sporulation (required)
TI4896S004338	11/E05	0.69	SPAC4H3.08		short chain dehydrogenase; similar to Sp SPAC922.06 and Sou1 (paralogs); involved in peroxisomal fatty acid beta-oxidation
TI4896S004931	52/A10	0.68	SPAC11E3.09	pyp3	protein-tyrosine phosphatase; mitotic inducer phosphatase; regulates Cdc2p
TI4896S004226	45/D04	0.68	SPAC1B1.02c		NAD kinase; ATP dependent; involved in nicotinate and nicotinamide metabolism; similar to Sp SPAC3H5.11 and SPCC24B10.02C
TI4896S002175	17/G09	0.68	SPBC4C3.09	B20341-1	acetylglucosaminyltransferase; galactosyltransferase family 8; predicted N-terminal signal sequence; tandem duplication; similar to S. pombe SPBC4C3.08 and SPAC5H120.02; similar to S. cerevisiae YOR320C
TI4896S004381	35/F11	0.68	SPAC2F3.08	sut1	alpha-glucoside transporter; function overlapping with?; glycoside-pentoside-hexuronide cation symporter family; major facilitator superfamily; involved in maltose uptake; no apparent Sc ortholog
TI4896S000533	40/D04	0.68	SPCC11E10.01	SPCC61.06	cystathionine beta-lyase; involved in methionine biosynthesis from L-homoserine via cystathione; cystathionine beta-lyase activity
TI4896S003624	41/E07	0.68	SPAC20H4.11c	rho5	Rho family; small GTPase; similar to Sp rho1
TI4896S002935	38/C05	0.68	SPAC24H6.09		RhoGEF; guanine nucleotide exchange factor; interacts physically with Cdc42p; regulates Cdc42p; involved in septation; involved in septum formation; involved in cellular elongation; involved in bipolar growth; predicted coiled-coil region; overexpression suppresses orb6-25; overexpression suppresses orb2-34; non-essential; involved in the Cdc42p-Shk1p-Orb6p signaling cascade; double mutant gef1de…
TI4896S004819	11/C06	0.68	SPAC890.05		conserved hypothetical eukaryotic protein; RNA-binding protein; G-patch domain
TI4896S002921	09/A11	0.68	SPAC13C5.01c	SPAC31A2.17c	20S proteasome component (alpha 3)
TI4896S002017	03/F01	0.68	SPBC685.04c	aps2	clathrin coat assembly protein; AP-2 adaptor complex; involved in vesicle-mediated transport
TI4896S001294	40/E06	0.68	SPBC1734.02c	cdc27; SPBC337.18c	DNA polymerase (delta subunit); involved in G2/M phase transition (required); interacts physically with Pcn1p; recruits PCNA to the Pol delta holoenzyme; interacts physically with Cdc1p; essential; involved in DNA replication (required); involved in telomere maintenance
TI4896S003634	42/A03	0.68	SPAC23C11.10		hypothetical proteinconserved hypothetical protein; similar to D. melanogaster CG16790; similar to M. musculus Q91W78; similar to human Q9BQ65; no apparent Sc ortholog
TI4896S004193	13/F12	0.68	SPAC3A11.04		conserved hypothetical protein; conserved in D. melanogaster and mouse; no apparent Sc ortholog
TI4896S002899	43/A05	0.68	SPAC630.11		involved in intracellular protein transport; involved in late endosome to vacuole trafficking
TI4896S003846	19/D08	0.68	SPAC7D4.06c		mannosyltransferase; dolichyl-P-Man, Man(5)GlcNAc(2)-PP-dolichyl mannosyltransferase
TI4896S001973	09/G11	0.68	SPBC3E7.07c		hypothetical protein
TI4896S003211	48/B03	0.68	SPAC56F8.03		translation initiation factor if-2
TI4896S002647	40/D08	0.68	SPBC16G5.18	erg24	sterol c-14 reductase; involved in ergosterol biosynthesis
TI4896S002874	24/A09	0.67	SPAC18B11.01c	SPAC12G12.16c	XP-G family; involved in nucleotide-excision repair; involved in DNA repair; exonuclease; no apparent Sc ortholog; Sp specific duplication
TI4896S002790	04/A01	0.67	SPAC11D3.02c		elaa family protein; putative acetyltransferase; no apparent Sc ortholog
TI4896S002223	04/H08	0.67	SPBC19F8.02		involved in nuclear migration (sensu Fungi); microtubule-interacting protein; similar to E. nidulans NUDC; eukaryotic conserved protein; no apparent Sc ortholog; non-essential
TI4896S001251	07/A10	0.67	SPBP35G2.02		conserved hypothetical protein; eukaryotic conserved protein; no apparent Sc ortholog
TI4896S002241	05/B12	0.67	SPBC25H2.05		nascent polypeptide-associated complex (alpha subunit); UBA domain
TI4896S004941	38/B06	0.67	SPAP8A3.05		translation release factor
TI4896S003927	29/C02	0.67	SPAC3F10.02c	trk1	potassium transporter; TrkH domain; similar to Sp trk2 (paralog)
TI4896S002863	23/H01	0.67	SPAC1F5.02		protein disulphide isomerase
TI4896S001648	47/A05	0.67	SPBC3H7.02		SulP sulfate transporter
TI4896S001003	24/B04	0.67	SPBC1773.15		membrane transporter; unknown specificity; allantoate permease family; similar to Sp SPCC757.13 and SPCC417.10
TI4896S004091	44/D04	0.67	SPAC1486.09		26S proteasome binding; PINc domain
TI4896S001199	36/F01	0.67	SPBC530.12c	yhc1	N-terminal palmitoyl-protein thioesterase domain; C-terminal phoshphatidic acid phosphatase domain (PAP2); domain combination not observed in other organisms; related toSc YGR036C; no apparent orthologs
TI4896S002778	49/C03	0.67	SPAC977.16c	dak2	dihydroxyacetone kinase; induced by glycerol (WB); repressed by glucose (WB)
TI4896S003497	24/C10	0.67	SPAC1002.16c		membrane transporter; unknown specificity; similar to SpSPAC11D3.18C and SPAC1683.12 and SPAC1039.04
TI4896S003710	01/D09	0.67	SPAC6C3.03c		very hypothetical protein
TI4896S001285	06/D04	0.67	SPBC337.09	erg28	involved in ergosterol biosynthesis
TI4896S003800	06/G07	0.67	SPAC25H1.03		hypothetical protein; no apparent Sc ortholog
TI4896S000594	34/D10	0.66	SPCC777.11		sequence orphan; hypothetical protein
TI4896S004676	32/G12	0.66	SPAC1834.01	sup45	translation release factor; directs the termination of nascent peptide synthesis
TI4896S003889	27/E06	0.66	SPAC6F6.03c		GTP-binding protein associated; localization nucleus; part of a pre-60S complex (SGD)
TI4896S003701	43/C07	0.66	SPAC13G7.06		phosphoadenosine phosphosulfate reductase; phosphoadenylyl-sulfate reductase (thioredoxin) activity; involved in methionine metabolism
TI4896S002685	45/B07	0.66	SPBC16C6.07c	rpt1	19S proteasome regulatory subunit; AAA family ATPase
TI4896S001601	37/F06	0.66	SPBC18H10.02		long-chain-fatty-acid-CoA ligase (putative); fatty acyl-CoA synthetase (putative); involved in the maintenance of viability in stationary phase; similar to Sp SPBP4H10.11C (paralog)
TI4896S000732	16/G01	0.66	SPCC18.12c		conserved eukaryotic protein; DUF652; involved in RNA processing and modification
TI4896S000297	30/C12	0.66	SPCC1393.05		hypothetical protein; sequence orphan
TI4896S004456	10/B11	0.66	SPAC25B8.02		hypothetical protein; sequence orphan; predicted coiled-coil region
TI4896S004854	31/F05	0.66	SPAC1250.05	rpl3002; rpl30-2; rpl30	60S ribosomal protein L30
TI4896S004532	48/E04	0.66	SPAC27F1.09c	prp10; sap155	U2 snRNP component; involved in mRNA splicing (IGI); essential; complexed with Cdc5p
TI4896S003470	13/A08	0.66	SPAC17A5.09c		low similarity to human protein phosphatase inhibitor 2 and S. cerevisiae GLC8-Modulator of protein; serine/threonine phosphatase-involved in control of vacuole fusion-by multiple alignment; conserved WDE*N.*MK**EP*TP[FY]
TI4896S003212	16/F05	0.66	SPAC56F8.04c	coq2; ppt1	experimentally characterised; para-hydroxybenzoate--polyprenyltransferase activity; involved in ubiquinone biosynthesis (IGI)
TI4896S000865	20/A02	0.66	SPCC965.12		dipeptidase; no apparent Sc ortholog; non-essential
TI4896S004795	10/C12	0.66	SPAC1B3.14	vma3	V-type ATPase; vacuolar ATP synthase subunit; V0 sector; proteolipid subunit
TI4896S000061	10/H02	0.66	SPCC1235.06		Sad1 interacting factor 1; no apparent orthologs
TI4896S004990	36/E06	0.66	SPAC1039.02		calcineurin-like phosphoesterase; similar to Sp SPBPB2B2.06C and SPAC17G6.03 (paralogs)
TI4896S000287	13/G10	0.66	SPCC1020.06c	tal1	transaldolase; involved in pentose-phosphate shunt, non-oxidative branch; transaldolase activity
TI4896S001729	31/C08	0.66	SPBC18E5.06	rps21	40S ribosomal protein S21
TI4896S002784	21/E05	0.66	SPAC1F8.04c		chlorohydrolase/deaminase; guanine deaminase; no apparent Sc ortholog
TI4896S000099	14/H01	0.66	SPCC553.06		sequence orphan; hypothetical protein
TI4896S002260	35/B07	0.66	SPBC17D11.06	pri2	DNA primase (large subunit); involved in telomere maintenance
TI4896S004528	51/F10	0.66	SPAC27F1.10		very hypothetical protein
TI4896S001917	46/G02	0.65	SPBC365.10		actin-like protein; involved in intracellular protein transport; involved in protein-vacuolar targeting
TI4896S003119	30/F10	0.65	SPAC1687.09		conserved hypothetical protein; predicted EF hand; serine-rich protein; no apparent orthologs
TI4896S001208	22/B05	0.65	SPBC36.06c		farnesyl pyrophosphate synthetase; Sp SPAC6F12.13C; involved in ergosterol biosynthesis
TI4896S000785	45/G08	0.65	SPCC576.17c		transporter; unknown specificity; similar to Sp car1 (paralog)
TI4896S000590	19/D02	0.65	SPCC777.07		glycosyl transferase family 15; similar to S. cerevisiae YOR099W and YKR061W and YJL139C and YDR483W and YBR205W and YBR199W and YPL053C; conserved fungal protein
TI4896S004433	02/E09	0.65	SPAC23A1.09		ribonucleoprotein; rrm RNA recognition motif; predicted to interact with mago-nashi homolog SPBC3B9.08; RNA-binding protein; no apparent Sc ortholog
TI4896S004106	17/C11	0.65	SPAC6G9.03c		conserved hypothetical protein; similar to SSRP proteins
TI4896S004397	18/F11	0.65	SPAC27E2.03c		GTP-binding protein; GTP1/OBG family
TI4896S003355	24/A03	0.65	SPAC5D6.07c		hypothetical protein; PXA domain; involved in intracellular signaling cascade (predicted); no ortholog
TI4896S000209	34/E02	0.65	SPCC1672.05c		tyrosine-tRNA ligase; involved intyrosyl-tRNA aminoacylation; tyrosine-tRNA ligase activity
TI4896S000793	43/F04	0.65	SPCC126.08c		lectin predicted; no apparent S. cerevisiae ortholog; predicted N-terminal signal sequence; 1 predicted transmembrane helix; cargo receptor for glycoproteins
TI4896S000327	24/F09	0.65	SPCC16A11.06c		alpha-1,2 mannosyltransferase; involved in GPI anchor biosynthesis
TI4896S001858	23/A08	0.65	SPBC19G7.14c		hypothetical protein with coiled-coil region; sequence orphan
TI4896S000430	17/H05	0.65	SPCC550.04c		phosphatidylinositol-glycan-class c; involved in GPI anchor biosynthesis
TI4896S000068	25/G09	0.65	SPCC1235.13	ght6; meu12	meiotic expression upregulated; hexose transporter; similar to Sp GHT1 and GHT2 and GHT4 and GHT5 and GHT3 and SPCC548.06C and SPBC1348.14C; tandem duplication
TI4896S003742	44/E04	0.65	SPAC22H10.12c	gdi1; sec19	RAB recycling protein
TI4896S005000	16/G11	0.65	SPAC922.03		1-aminocyclopropane-1-carboxylate deaminase; no apparent Sc ortholog
TI4896S000244	01/H06	0.65	SPCC16C4.20c		hypothetical protein; sequence orphan
TI4896S001301	13/D03	0.65	SPBC1734.09		NST UDP-N-acetylglucosamine transporter
TI4896S000325	29/H04	0.65	SPCC16A11.04		sorting nexin; PX domain; phosphoinositide binding; involved in intracellular protein transport; RGS domain, regulator of G-protein signaling; similar domain arrangement to human SNX13
TI4896S003464	18/D09	0.65	SPAC17A5.03	rpl301; rpl3-1; rpl3	60S ribosomal protein L3; similar to Sp rpl302; identical to rpl302 except AA78,V-I
TI4896S001318	01/H02	0.65	SPBC1709.10c		heavy metal binding protein; involved in metal homeostasis; involved in heavy metal ion transport
TI4896S001864	32/F05	0.65	SPBC36B7.04		dihydrouridine synthase; involved in tRNA modification
TI4896S002546	09/F05	0.65	SPBC3B9.08c		mago-nashi homolog; involved in mRNA splicing; involved in mRNA; no apparent Sc ortholog; non-essential
TI4896S001222	50/E04	0.65	SPBC713.09		hypothetical protein; sequence orphan; predicted coiled-coil
TI4896S003939	02/G09	0.65	SPAC3F10.14		questionable ORF
TI4896S003761	05/E02	0.64	SPAC6B12.13		hypothetical protein; Sc YFR003C may physically interact with Glc7p and Ppz1p; Sc YFR003C is null lethal
TI4896S000251	20/B08	0.64	SPCC16C4.08c	skb15	interacts physically with Shk1p; negative regulator of Shk1; WD repeat protein
TI4896S002015	25/C04	0.64	SPBC685.02	SPBC685.02	conserved hypothetical; conserved protein; no apparent Sc ortholog
TI4896S001479	50/F11	0.64	SPBP22H7.07	prp5; cwf1; pi024; SPACTOKYO_453.10	WD repeat protein; prl1/prl2 phosphatases pleiotrophic regulator-like; involved in mRNA splicing (IGI); interacts physically with Cdc5p; nineteen complex (Ntc)(putative); essential
TI4896S000395	01/B05	0.64	SPCC1259.05c	cox9	cytochrome c oxidase activity (subunit VIIA); respiratory chain complex IV (sensu Eukarya)
TI4896S000324	35/E06	0.64	SPCC16A11.03c		hypothetical protein; similar to P. yoelii PY04680; similar to P. falciparum MAL8P1.103; similar to Sp SPAC22H10.08; no apparent Sc ortholog
TI4896S003341	38/F02	0.64	SPAC9.05		DEAD/DEAH box helicase; ATP-dependent; RNA helicase; similar to Sp SPAC20H4.04 (paralog)
TI4896S001145	35/C12	0.64	SPBC947.05c		ferric reductase transmembrane component; similar to Sp frp1 (paralog)
TI4896S002919	19/B01	0.64	SPAC31A2.15c		replication factor C complex; involved in sister chromatid cohesion
TI4896S003584	10/A02	0.64	SPAC607.02c		lysine-rich protein; hypothetical protein; sequence orphan
TI4896S004623	12/G01	0.64	SPAC637.10c	rpn10; pus1	19S proteasome regulatory subunit; ubiquitin-binding protein; UBA domain; VWA domain; involved in protein deubiquitination
TI4896S003941	27/B01	0.64	SPAC3F10.16c		GTPase; involved in ribosome biogenesis
TI4896S002724	19/H03	0.64	SPBC8E4.03		agmatinase; no apparent Sc ortholog
TI4896S004790	37/F03	0.64	SPAC1B3.10c		SEL1 repeat protein; possibly extracellular by similarity to C. elegans sel-1; no apparent Sc ortholog
TI4896S004051	50/D05	0.64	SPAC589.09		involved in phosphatidylinositol metablolism; CAL TRIO domain
TI4896S003201	27/D08	0.64	SPAC30D11.09	cwf19	eukaryotic conserved protein; zinc finger protein; involved in RNA processing
TI4896S002397	19/A11	0.64	SPBP8B7.10c		conserved hypothetical protein; possibly involved in protein synthesis ?????; coiled-coil?
TI4896S003560	17/B09	0.64	SPAC9G1.12	cpd1	tRNA methyltransferase; involved in tRNA modification; non-essential
TI4896S003442	14/C10	0.64	SPAC664.01c	swi6; SPAC824.10c	involved in mating-type switching (required); silent heterochromatin component; involved in chromosome segregation (required); involved in chromosome cohesion (required); involved in centromere function; involved in the association of Rad26p with centromeres (required); deletion mutant results in lagging chromosomes at mitosis at reduced temperature (frequent); chromodomain protein; binds centrom…
TI4896S003167	44/G05	0.64	SPAC23C4.01	SPAC139.06	histone acetyltransferase (type b) (catalytic subunit)
TI4896S004692	26/A02	0.63	SPAC458.02c		involved in mitosis; involved in cytokinesis; involved in meiosis; involved in spindle assembly
TI4896S003109	46/F07	0.63	SPAC22H12.05c		fasciclin domain protein (3); cell-adhesion molecule in higher eukaryotes
TI4896S002303	42/E06	0.63	SPBC4B4.06		hypothetical protein; conserved protein; required for normal mating efficiency in yeast???
TI4896S003332	11/F11	0.63	SPAC3A12.13c		conserved hypothetical protein; low similarity to D. melanogaster CG12131; no apparent Sc ortholog
TI4896S002774	51/C10	0.63	SPAC977.12		L-asparaginase (putative); similar to Sp SPBPB8B6.05c and SPAC186.03 and SPBPB21E7.09
TI4896S003388	07/C12	0.63	SPAC23H4.11c		sequence orphan; hypothetical protein
TI4896S001277	29/E06	0.63	SPBC146.14c	sec26; SPBC337.01c	adaptin; coatomer (beta subunit); the coatomer is a cytosolic protein complex that binds to dilysine motifs and reversibly associates with Golgi non- clathrin-coated vesicles, which further mediate biosynthetic protein transport from the ER, via the Golgi up to the trans Golgi network; Coatomer complex is required for budding from Golgi membranes, and is essential for the retrograde Golgi-to-ER t…
TI4896S003535	37/D04	0.63	SPAP14E8.06c	orp3; orc3; SPAC3H1.01c	origin recognition complex (subunit 3)
TI4896S003617	49/E05	0.63	SPAC20H4.04		DEAD/DEAH box helicase; ATP-dependent; RNA helicase; similar to Sp SPAC9.05
TI4896S001231	41/B03	0.63	SPBC216.05	rad3	ATR (ATM) checkpoint kinase; involved in DNA repair; involved in DNA damage checkpoint; involved in DNA replication checkpoint; involved in meiotic recombination
TI4896S004998	03/G02	0.63	SPAC922.01	mmf2; hpm1; SPAC1039.10	eukaryotic conserved protein; endoribonuclease L-PSP: YjgF family; involved in mitochondrial protein synthesis (inhibition); involved in mitochondrial DNA maintenance; translation initiation inhibitor; similar to Sp mmf1
TI4896S003225	02/F06	0.63	SPAC22A12.02c		hypothetical protein; sequence orphan; has transcript profile on microarray
TI4896S002570	45/C10	0.63	SPBC215.13		Sp specific families; serine-rich protein; possibly Sp specific; GPI anchored protein; (pers. comm. Birgit Eisenhaber); glycoprotein; no apparent Sc ortholog
TI4896S001794	43/B06	0.63	SPBC14C8.13		very hypothetical; very hypothetical protein
TI4896S004394	22/D10	0.63	SPAC11G7.06c	B8647-2	Sp specific families; Pfam-B_8647 domain
TI4896S000069	34/E03	0.63	SPCC1235.14	ght5	hexose transporter; similar to Sp GHT1 and GHT2 and GHT4 and GHT3 and GHT6 and SPCC548.06C and SPBC1348.14C; tandem duplication
TI4896S004264	14/D05	0.63	SPAC1142.06		ArsA ATPase family; ATPase; involved in anion transport; involved in metal homeostasis
TI4896S002552	22/D06	0.63	SPBC3B9.14c		mitochondrial ribosomal protein L3; RNAse3 domain; ds-RNA binding motif
TI4896S001720	22/A03	0.63	SPBC29A3.15c		mitochondrial ribosomal protein small subunit
TI4896S001764	32/H01	0.63	SPBC1711.13	his2	histidinol dehydrogenase
TI4896S004362	04/G10	0.63	SPAC926.07c		dynein light chain
TI4896S000187	07/E03	0.63	SPCC970.12		sequence orphan; hypothetical protein
TI4896S004634	41/G03	0.63	SPAC12B10.07		F-actin capping protein (alpha subunit); involved in actin filament organization; involved in F-actin capping; actin cortical patch component
TI4896S002595	31/E11	0.63	SPBC56F2.02	rpl1901; rpl19-1	60S ribosomal protein L19
TI4896S001892	28/H09	0.63	SPBC12C2.08		dynamin family; dynamin GTPase effector domain; involved in mitochondrial morphology; involved in mitochondrial localization; involved in mitochondrial fission
TI4896S003716	20/B04	0.62	SPAC6C3.09		hypothetical protein; low similarity to ribonuclease P protein subunit p40; no apparent Sc ortholog
TI4896S001361	30/A06	0.62	SPBC725.06c		serine/threonine protein kinase; similar to Sp cek1 (paralog)
TI4896S002443	44/D10	0.62	SPBC13G1.13	SPBC31F10.01	transcription factor TFIIH
TI4896S003654	05/B01	0.62	SPAC1783.06c		involved in autophagy; involved in cytoplasm to vacuole targeting
TI4896S000629	05/D10	0.62	SPCC191.01	SPCC417.13	hypothetical protein; sequence orphan
TI4896S004418	11/C05	0.62	SPAC19G12.09		oxidoreductase; aldo/keto reductase
TI4896S003895	04/D11	0.62	SPAC6F6.09		hypothetical protein
TI4896S001383	18/D12	0.62	SPBC651.10		sequence orphan; hypothetical protein
TI4896S004641	49/D04	0.62	SPAC12B10.14c		serine/threonine protein kinase; similar to Sp pak1 and shk2 (paralogs)
TI4896S000911	23/B10	0.62	SPCC569.06		Sp specific families; similar to Sp SPCC61.05 and SPAC26H5.07C
TI4896S000074	04/C07	0.62	SPCC548.04		putative ubiquitin-related protein
TI4896S004468	43/E11	0.62	SPAC25B8.14	mal2	involved in genome stability (required); involved in chromosome segregation (required); essential; deletion mutant results in nondisjunction of sister chromatids; involved in chromatin organization at the centromere (maintenance) (required); involved in centromeric transcriptional silencing (required); inner centomere core complex; required for correct metaphase spindle length; no apparent orthol…
TI4896S000740	31/A09	0.62	SPCC290.03c		nucleoporin
TI4896S001319	14/G10	0.62	SPBC1709.11c	png2	zinc finger protein; zf-PHD finger; similar to human candidate tumour suppressor p33(ING1) in their C-terminal regions; involved in chromatin mediated transcriptional regulation; involved in transcriptional regulation
TI4896S004536	17/F06	0.62	SPAC23D3.04c	gpd2	glycerol-3-phosphate dehydrogenase [NAD+]; similar to Sp SPBC215.05 (paralog)
TI4896S002849	04/A08	0.62	SPAC806.07	ndk1	nucleoside diphosphate kinase; involved in CTP biosynthesis; involved in regulation of sexual development
TI4896S001119	31/G10	0.62	SPBC839.05c	rps1701; rps17-1	40S ribosomal protein S17
TI4896S000519	26/D08	0.62	SPCC622.11		conserved hypothetical; hypothetical protein; conserved in C. elegans, D. melanogaster CG8135 and A. thaliana; no apparent Sc ortholog
TI4896S001871	50/F01	0.62	SPBP18G5.03		hypothetical protein; sequence orphan
TI4896S004013	43/C06	0.62	SPAC31G5.18c		ubiquitin family protein; no apparent Sc ortholog
TI4896S001620	11/H10	0.62	SPBC9B6.03		conserved hypothetical; zinc finger protein; zf-FYVE type
TI4896S003686	42/H05	0.62	SPAC4G9.11c	cmb1	HMG box mismatch binding protein vHMG box; involved in DNA repair; involved in mismatch repair; binds to cytosines in base mismatches and opposite chemically altered guanines
TI4896S000047	11/D07	0.62	SPCC320.11c	SPCC330.18	involved in 60S ribosomal subunit biogenesis
TI4896S002999	14/G04	0.62	SPAC1F3.04c		conserved protein; DUF367; putative metal binding domain
TI4896S004613	08/G09	0.62	SPAC27D7.12c		hypothetical protein; sequence orphan; distantly related to peroxiredoxin
TI4896S000988	23/B12	0.61	SPBC800.13		Histone-fold/TFIID-TAF/NF-Y (Interpro); DNA-binding protein; involved in transcriptional regulation; no apparetn Sc ortholog
TI4896S000094	05/A06	0.61	SPCC553.11c		transcription initiation factor TFIIA (small subunit)
TI4896S004270	12/E04	0.61	SPAC8C9.05		D-Tyr-tRNA[Tyr] deacylase
TI4896S000984	51/H11	0.61	SPBC800.14c		hypothetical protein; sequence orphan
TI4896S003850	45/B09	0.61	SPAC7D4.02c		conserved hypothetical; hypothetical proteinsrc (SH3) homology domain; no apparent orthologs
TI4896S003665	13/B08	0.61	SPAC18G6.09c		hypothetical serine-rich protein; sequence orphan
TI4896S001072	38/G01	0.61	SPBC902.01c	alp6; SPBC428.20c	gamma-tubulin complex; spindle pole body component; involved in spindle assembly checkpoint; essential
TI4896S004650	13/E08	0.61	SPAC30C2.02		HEAT repeat
TI4896S002484	31/A08	0.61	SPBC23E6.04c		ubiquitin-protein ligase (E3); associates with the 26S proteasome; HECT domain; ankyrin or armadillo repeats
TI4896S001238	19/E02	0.61	SPBC646.06c		glycosyl hydrolase family 71; glucanase; similar to Penicillium purpurogenum mutanase; no apparent Sc ortholog
TI4896S000305	23/B08	0.61	SPCC1393.13		hypothetical protein; similar to Sp SPAC806.04C (paralog)
TI4896S003084	39/D09	0.61	SPAC2G11.12	rqh1; hus2; rad12	ATP-dependent DNA helicase Hus2 ATP-dependent RecQ type DNA helicase; DEAD/DEAH box helicase; involved in meiotic recombination; involved in DNA repair; checkpoint-dependent DNA damage response during S phase; involved in the processing of stalled and collapsed replication forks; required for the maintenance of genome stability; human disease associated; mutants display reduced viability; mutants…
TI4896S002104	40/E08	0.61	SPBC2D10.06	rep1; rec16	DSC1/MBF trancription factor complex; involved in meiotic recombination; involved in DNA repair; zinc finger protein; zf-C2H2 type; involved in start control point of mitotic cell cycle; no apparent orthologs
TI4896S000268	42/B11	0.61	SPCC18B5.04		ribosomal protein S18
TI4896S003906	10/H05	0.61	SPAC1805.02c		electron transfer flavoprotein (beta subunit)
TI4896S004194	15/F03	0.61	SPAC3A11.03		eukaryotic conserved protein
TI4896S003904	29/B06	0.61	SPAC1805.01c	SPAPJ736.02c	serine/threonine protein kinase
TI4896S001908	16/D07	0.61	SPBC365.01		sec14 cytosolic factor family; CRAL/TRIO domain; phosphatidylinositol transfer protein; similar to Sp SPAC3H8.02 (paralog)
TI4896S001045	46/F04	0.61	SPBC582.04c		hypothetical protein; sequence orphan; non-essential
TI4896S004660	35/F09	0.61	SPAC144.03	ade2; min10; min3	adenylosuccinate synthetase; involved in cadmium resistance (required); involved in purine biosynthesis
TI4896S004236	10/D09	0.61	SPAC17A2.08c		hypothetical protein; sequence orphan
TI4896S004753	31/F10	0.61	SPAC4F10.14c	btf3	nascent polypeptide-associated complex; chaperone
TI4896S000518	29/B08	0.61	SPCC622.10c		sequence orphan; hypothetical protein
TI4896S003459	43/D12	0.61	SPAC105.02c		conserved hypothetical; hypothetical protein; ankyrin repeat protein
TI4896S003496	12/D05	0.61	SPAC1002.15c	pmc5; med6	RNA polymerase II holoenzyme component
TI4896S001868	32/C02	0.61	SPBC36B7.08c		involved in chromatin decondensation; template activating factor; involved in nucleosome assembly; similar to human oncoprotein SET (TAF1beta)
TI4896S003357	10/G05	0.60	SPAC5D6.05	sep11; pmc6	RNA polymerase II holoenzyme component; mediator complex subunit; involved in cytokinesis; involved in cell separation; involved in sexual differentiation (required); no apparent orthologs
TI4896S002803	02/H10	0.60	SPAC11D3.16c		hypothetical protein; sequence orphan
TI4896S001081	14/A07	0.60	SPBC1685.04		sequence orphan; hypothetical protein; non-essential
TI4896S003408	01/E02	0.60	SPAP27G11.11c		very hypothetical protein
TI4896S000191	03/F03	0.60	SPCP31B10.02		conserved VP.KP.EP.NCC.SGC..CVW.Y..DL
TI4896S003861	12/G10	0.60	SPAC4F8.04		involved in RNA processing; RNA-binding protein; involved in ribosome biogenesis and assembly; Brix domain; eukaryotic conserved protein
TI4896S004943	21/E04	0.60	SPAP8A3.07c		phospho-2-dehydro-3-deoxyheptonate aldolase
TI4896S002107	22/D03	0.60	SPBC2D10.09		3-hydroxyisobutyryl-coenzyme a hydrolase; Enoyl-CoA isomerase family
TI4896S004636	50/E12	0.60	SPAC12B10.09		mitochondrial carrier; involved in mitochondrial transport; unknown specificity
TI4896S000964	18/F12	0.60	SPBC660.12c		peptide epimerase; no apparent Sc ortholog
TI4896S002715	20/B01	0.60	SPBC1289.11	spf38; cwf17	small nuclear ribonucleoprotein (snRNP) U5 particle component; WD repeat protein; complexed with Cdc5p; involved in mRNA splicing; no apparent Sc ortholog
TI4896S000161	37/C07	0.60	SPCC4G3.10c	rhp42; rhp4b	involved in DNA repair; involved in nucleotide-excision repair; involved in mismatch repair; XP-C family; similar to Sc YER162C; similar to Sp rhp41 (paralog)
TI4896S004353	11/A12	0.60	SPAC1071.09c		DNAJ domain protein
TI4896S002578	44/F02	0.60	SPBC1347.06c	cki1	casein kinase I homolog Cki1; serine/threonine protein kinase; regulator of phosphatidylinositol 4-phosphate 5-kinase; similar to Sp SPBP35G2.05C and SPAC1805.05 (paralogs)
TI4896S001502	41/D10	0.60	SPBC11B10.06	pi005; SPACTOKYO_453.32	conserved hypothetical; zinc finger protein; zf-SWIM; similar to N. crassa b24G3.170; no apparent Sc ortholog
TI4896S000005	19/D04	0.60	SPCC757.01	nic1; SPCC1884.02	NiCoT heavy metal ion transporter; no apparent Sc ortholog
TI4896S001911	08/C05	0.60	SPBC365.04c		RNA-binding protein; rrm RNA recognition motif
TI4896S004210	10/D11	0.60	SPAC16E8.04c		chorismate mutase
TI4896S004539	12/G03	0.59	SPAC23D3.07		20S proteasome component (beta 2)
TI4896S002756	51/D02	0.59	SPBC1348.08c	SPAC1348.08c	Sp specific families; glycoprotein protein; serine/threonine-rich; possibly Sp specific; telomeric duplication; similar to Sp SPAPB2C8.01 and SPAC1F8.06 and SPAC977.07C and SPCC188.09C
TI4896S003037	11/E12	0.59	SPAC1296.05c		cyclin related protein
TI4896S001525	03/H03	0.59	SPBC83.17		yeast mbf1 homolog; transcription factor; multiprotein bridging factor
TI4896S004967	43/G09	0.59	SPAC3G6.04	rnp24	RNA-binding protein; rrm RNA recognition motif
TI4896S004228	26/H02	0.59	SPAC1B1.04c		polyA specific ribonuclease subunit
TI4896S001048	19/E12	0.59	SPBC582.07c	rpn7	19S proteasome regulatory subunit; essential
TI4896S002979	25/C12	0.59	SPAC2F7.17		peptide chain release factor
TI4896S001878	10/H04	0.59	SPBC1921.07c	SPBC21D10.13	hypothetical protein
TI4896S004564	18/F05	0.59	SPAC16.01	rho2	Rho family; small GTPase; involved in cellular morphogenesis; involved in septation; non-essential; overexpression results in loss of cell polarity and is lethal
TI4896S004152	26/C06	0.59	SPAC26A3.15c		nucleoporin; nuclear pore complex; involved in nuclear export; involved in nuclear import
TI4896S004759	08/A07	0.59	SPAC4F10.20	grx1	arsenate reductase (glutaredoxin) activity; glutaredoxin; thioltransferase; induced by stress; induced in response to metal stress caused by zinc chloride; not induced in response to heat stress; not induced in response to oxidative stress
TI4896S002681	09/E06	0.59	SPBC16C6.03c		hypothetical protein; sequence orphan
TI4896S003040	22/A06	0.58	SPAPJ696.02		actin cortical patch component; involved in actin cytoskeletal organization; involved in endocytosis; src (SH3) homology domain
TI4896S003583	47/H04	0.58	SPAC607.01	psc3; SPAC17H9.20	cohesin subunit; essential; involved in sister chromatid cohesion (S phase) (required); involved in mitotic progression; STAG domain
TI4896S003302	16/G02	0.58	SPAC57A10.04		hypothetical protein; sequence orphan; low similarity to RhoGEF
TI4896S001366	32/C08	0.58	SPBC725.11c	php2	CCAAT-box binding factor subunit; involved n growth on non-fermentable carbon sources, transcriptional activation
TI4896S000314	14/E10	0.58	SPCC63.06		Status conserved hypothetical; WD repeat protein
TI4896S001738	08/C04	0.58	SPBC23G7.03	SPBC18E5.13	translation initiation factor 3; low similarity to bacterial translation initiation factors; no apparent Sc ortholog
TI4896S000559	47/G05	0.58	SPCC584.01c		sulfite reductase; NADPH flavoprotein subunit
TI4896S004501	02/G03	0.58	SPAC2C4.04c		hypothetical protein; possibly fungal specific
TI4896S003251	05/H12	0.58	SPAC10F6.07c		hypothetical protein; sequence orphan
TI4896S001450	33/C02	0.58	SPBC8D2.13	pi052	involved in snoRNP biogenesis
TI4896S003376	18/F04	0.58	SPAC167.02	ptb1	type II proteins geranylgeranyltransferase (beta subunit)
TI4896S002375	15/A06	0.58	SPBC16D10.01c	SPBC418.03c	TPR repeat protein; possibly interacts with protein phosphatase 2C
TI4896S003036	06/G02	0.58	SPAC1296.04		very hypothetical protein; dysferlin-C terminal domain
TI4896S003267	08/C12	0.58	SPAC56E4.07		acetyltransferase; GNAT family; similar to bacterial acetyltransferases; no apparent Sc ortholog
TI4896S000139	06/C10	0.58	SPCC1682.14	rpl902; rpl19-2	60S ribosomal protein L19B
TI4896S002829	44/G04	0.58	SPAC13G6.11c		putative mevalonate kinasemevalonate kinase; involved in ergosterol biosynthesis
TI4896S001981	20/F10	0.58	SPBC4F6.02c	SPBC3E7.15c	LAG1 domain; lipid sensing domain; involved in ceramide synthesis
TI4896S003403	42/D02	0.58	SPAP27G11.06c		AP-1 Golgi-associated clathrin assembly proteinAP-1adaptor complex; involved in vesicle-mediated transport
TI4896S002159	09/A08	0.57	SPBC30D10.05c		short chain dehydrogenase
TI4896S000397	17/C10	0.57	SPCC1259.07		conserved hypothetical protein
TI4896S003456	37/B02	0.57	SPACUNK12.01	SPAC664.15	conserved hypothetical; WD repeat protein
TI4896S002474	29/C03	0.57	SPBC21C3.14c		sequence orphan; hypothetical protein; serine-rich protein
TI4896S004135	12/F04	0.57	SPAC2E1P5.03		DNAJ domain protein
TI4896S001682	34/B05	0.57	SPBC1A4.03c	top2	DNA topoisomerase II; DNA gyrase B domain
TI4896S004591	10/E03	0.57	SPAC17C9.10	stm1	G-protein coupled receptor activity; possibly couples with heterotrimeric G protein Gpa2p; PQ loop; similar to Sp SPAC2E12.03c
TI4896S004720	19/D11	0.57	SPAC22F8.01	arp2; SPAC11H11.06	ARP2/3 actin-organizing complex; involved in actin assembly and function; involved in actin cortical patch assembly; actin-like protein; involved in cell polarity; involved in endocytosis
TI4896S001019	19/G09	0.57	SPBC1271.04c		deoxyhypusine synthase
TI4896S004024	37/H04	0.57	SPAC24C9.05c		conserved protein; CBS domain protein; octicosapeptide repeat; no apparent Sc ortholog
TI4896S002870	20/E04	0.57	SPAC18B11.05		eukaryotic conserved protein
TI4896S003735	01/C09	0.57	SPAC22H10.06c		very hypothetical protein
TI4896S000746	17/B05	0.57	SPCC1906.01		mannose-1-phosphate guanyltransferase
TI4896S001395	06/E10	0.57	SPBC3D6.08c		small nuclear ribonucleoprotein (Sm protein); RNA-binding protein; involved in mRNA decay; involved in rRNA processing; involved in deadenylation-dependent decapping
TI4896S004334	16/G07	0.57	SPAC4H3.04c		conserved hypothetical protein; UPF0103 family
TI4896S002346	48/F07	0.57	SPBC1105.10		involved in regulation of (H+)-ATPase in vacuolar membrane
TI4896S000454	05/H02	0.57	SPCC645.11c		hypothetical protein; sequence orphan
TI4896S001522	25/B11	0.57	SPBC83.15		WD repeat protein; involved in ribosome biogenesis and assembly
TI4896S004396	14/F12	0.57	SPAC27E2.02		conserved protein; UPF0029; involved in general amino acid control response; similar to M. musculus IMPACT protein
TI4896S001470	49/E12	0.57	SPBC691.03c	apl3; pi033; SPACTOKYO_453.02c	adaptin; AP-2 adaptor complex; involved in vesicule-mediated transport; Adaptins are components of the adaptor complexes which link clathrin to receptors in coated vesicles. Clathrin-associated protein complexes are believed to interact with the cytoplasmic tails of membrane proteins, leading to their selection and concentration; Alpha adaptin is a subunit of the plasma membrane adaptor
TI4896S000224	42/F10	0.57	SPCC1183.08c	rpl101; rpl1-1; rpl10a-2	60S ribosomal protein L10A
TI4896S003893	07/H12	0.57	SPAC6F6.07c	rps13	40S ribosomal protein S13
TI4896S004090	04/B06	0.57	SPAC1486.08		involved in cytochrome c oxidase biogenesis
TI4896S003723	07/E08	0.57	SPAC17G8.07		involved in transcriptional regulation; chromatin associated; human homologue GAS41 is glioma amplified; predicted C-terminal coiled-coil region; histone-like transcription factor family
TI4896S002590	28/G02	0.57	SPBC56F2.07c		AAA family ATPase
TI4896S003283	03/A06	0.57	SPAC6F12.04		COPI-coated vesicle associated protein; conserved fungal protein; similar to S. cerevisiae YDR100W; 4 predicted transmembrane helices; involved in vesicular transport and membrane fusion (Sc 2-hybrid data)
TI4896S003359	12/D09	0.56	SPAC5D6.02c		hypothetical protein; sequence orphan
TI4896S002338	20/A12	0.56	SPBC1105.02c	lys4	homocitrate synthase; mitochondrial isozyme; involved in lysine metabolism
TI4896S000175	18/C06	0.56	SPCC364.02c	bis1	involved in stress response; interacts physically with Isp1p; overexpression results in a cell elongation phenotype; ES2 nuclear protein family; deleted in DiGeorge syndrome homolog; deletion mutant results in reduced viability in stationary phase; no apparent Sc ortholog
TI4896S000049	23/A04	0.56	SPCC320.09		ferrochelatase
TI4896S000696	16/H03	0.56	SPCC1223.10c		very hypothetical protein
TI4896S003009	45/E05	0.56	SPAC1D4.04	cct2	T-complex protein 1 (beta subunit); chaperonin-containing T-complex; involved in protein folding; involved in actin folding; involved in tubulin folding
TI4896S001718	16/G08	0.56	SPBC29A3.13		conserved hypothetical; PWWP domain protein; involved in cell growth; similar to Sp SPBC215.07C and SPAC23D3.01
TI4896S003307	08/B11	0.56	SPAC57A10.09c		nonhistone chromosomal protein; HMG box; involved in establishment and/or maintenance of chromatin architecture; involved in transcriptional regulation from PolII promoter
TI4896S002213	50/D12	0.56	SPBC776.18c	pmh1	transcription initiation factor TFIIH subunit; Mcs complex (pers. comm R Fisher); zinc finger protein; zf-C3HC4 type (RING finger); ubiquitin ligase (E3)
TI4896S000540	47/H06	0.56	SPCC11E10.08	rik1	involved in chromatin silencing; involved in chromatin silencing at silent mating type cassettes (sensu Fungi) (required); similar to Sp SPAC17H9.10C (paralog)
TI4896S000092	01/E03	0.56	SPCC794.15		very hypothetical protein
TI4896S001074	05/E05	0.56	SPBC902.03		involved in meiosis; involved in sporulation; non-essential
TI4896S001685	44/B06	0.56	SPBC1A4.06c		conserved eukaryotic protein; similar to proline transport helper protein
TI4896S000154	06/E12	0.56	SPCC4G3.17		HD domain; metal dependent phosphohydrolase
TI4896S004557	03/G04	0.56	SPAC30.08	SPAC29E6.04	involved in spindle orientation; involved in mRNA export
TI4896S003129	36/G07	0.56	SPAC1687.18c		hypothetical protein; sequence orphan
TI4896S003175	25/E02	0.56	SPAC23C4.10	sec2	guanine nucleotide exchange factor; coiled-coil domain is essential for function in Sc SEC2; involved in intracellular protein transport
TI4896S000584	18/G06	0.56	SPCC13B11.04c	SPCC777.01c	glutathione-dependent formaldehyde dehydrogenase
TI4896S004721	17/F02	0.56	SPAC22F8.02c		PvGal biosynthesis protein Pvg5; predicted N-terminal signal sequence; involved in cell wall biosynthesis; deletion mutant galactomannans deficient for pyruvylated galactose-beta-1,3-galactose-alpha-1,2-pyruvate (PvGal); no apparent orthologs; Sp specific families
TI4896S002370	01/H04	0.56	SPBC887.16		very hypothetical protein
TI4896S004592	31/D02	0.56	SPAC17C9.09c	tim13	60S ribosomal protein L37a/L43A
TI4896S001446	31/D05	0.56	SPBC8D2.09c		U2 b'-like spliceosomal protein; U2 snRNA-associated protein; involved in mRNA splicing; rrm RNA recognition motif; RNA-binding protein
TI4896S000276	09/D01	0.56	SPCC14G10.01	SPBC18B5.12; SPCC18B5.12	conserved hypothetical; conserved protein; UPF0038 family
TI4896S000428	18/F08	0.56	SPCC550.02c	cwf5; ecm2	RNA-binding protein; involved in mRNA splicing; complexed with Cdc5p; 40S snRNP-containing complex; rrm RNA recognition motif
TI4896S002460	34/D05	0.55	SPBC21C3.01c	vps13a; SPBC31F10.18c	involved in intracellular protein transport
TI4896S002412	08/C02	0.55	SPBP8B7.25	cyp4	cyclophilin; peptidyl-prolyl cis-trans isomerase
TI4896S004094	44/B08	0.55	SPAC6G10.03c		hypothetical protein; Sc YGR110W is induced during aerobic growth; abhydrolase family
TI4896S002361	04/E11	0.55	SPBC887.07		mitochondrial ribosomal protein l14
TI4896S000762	26/H10	0.55	SPCC1739.13	hsp70	heat shock protein 70 family; similar to Sp SPAC13G7.02 (paralog)
TI4896S000680	23/F11	0.55	SPCC285.11		ubiquitin-regulatory protein; UBX domain
TI4896S000424	13/E02	0.55	SPCC4B3.01	SPCP25A2.01c	3-mercaptopyruvate sulfurtransferase
TI4896S002277	40/A01	0.55	SPBC11C11.07	rpl1801; rpl18; rpl18-1	60S ribosomal protein L18
TI4896S002050	49/F03	0.55	SPBP19A11.03c	mts4	19S proteasome (regulatory subunit); interacts physically with Mts2p; PC repeats; essential
TI4896S000595	10/H11	0.55	SPCC777.12c		hypothetical protein; sequence orphan
TI4896S001484	41/G05	0.55	SPBC32H8.03	bem46; SPACTOKYO_453.15c	suppressor of bem1; suppressor of bud5
TI4896S001576	16/C06	0.55	SPBC2F12.15c		zinc finger protein; zf-DHHC type; palmitoyltransferase activity; involved in palmitoylation
TI4896S000405	37/H10	0.55	SPCC1259.14c	meu27; B8647-6	possibly Sp specific; Pfam_B_8647 domain; NLS; meiotic expression upregulated
TI4896S004139	24/G10	0.55	SPAC26A3.02	myh1; myh	MutY homolog; involved in mismatch repair; interacts physically with Pcn1p; adenine DNA glycosylase; A/8-oxoG glycosylase; deletion mutant has mutator phenotype; oxidative DNA damage protection; no apparent Sc ortholog (old-> A/G-specific adenine DNA glycosylase)
TI4896S001960	12/H08	0.55	SPBC6B1.03c		conserved hypothetical; hypothetical protein
TI4896S001592	39/E12	0.55	SPBC1D7.02	scr1; SPBC1D7.02c	glucose mediated repressor of Inv1 transcriptional regulator; zinc finger protein; zf-C2H2 type; glucose mediated repressor of inv1 and fbp1
TI4896S000234	46/E03	0.55	SPCC5E4.02c	ccr4; SPCC31H12.08c	similar to yeast glucose-repressible alcohol; CCR4-Not complex
TI4896S003749	16/H05	0.54	SPAC6B12.01	SPAC1B9.03c	RNA-binding protein; eukaryotic conserved protein; involved in RNA processing; involved in ribosome biogenesis and assembly; Brix domain
TI4896S000505	23/C01	0.54	SPCC1281.06c		acyl-coA desaturase
TI4896S000331	14/B11	0.54	SPCC16A11.10c	oca8	cytochrome b5; electron transporter; overexpression results in cell cycle defects; similar to Sp SPBC29A10.16C
TI4896S000756	03/B01	0.54	SPCC1739.07		similar to DNA-binding protein c1D; no apparent Sc ortholog
TI4896S003137	13/F05	0.54	SPAC222.06		nuclear HMG-like acidic protein; involved in ribosome biogenesis and assembly
TI4896S002036	07/D01	0.54	SPBC32F12.13c	SPBC19C7.01	sequence orphan; hypothetical protein
TI4896S001489	49/B08	0.54	SPBC32H8.08c	pi016; SPACTOKYO_453.20	mannosyltransferase complex subunit predicted; glycosyl transferase family 15; conserved fungal protein; similar to S. cerevisiae YNL029C and YIL085C; similar to S. pombe SPBC1773.08C
TI4896S003629	11/G01	0.54	SPAC23C11.05	ppa1; ppa	inorganic pyrophosphatase
TI4896S004062	30/H03	0.54	SPAC688.10	rev1	DNA polymerase zeta (catalytic subunit); involved in DNA repair, error-prone translesion synthesis
TI4896S001810	31/G03	0.54	SPBC21H7.07c	his5	imidazoleglycerol-phosphate dehydratase; involved in histidine biosynthesis
TI4896S004652	21/A02	0.54	SPAC30C2.04		cofactor for methionyl-and glutamyl-tRNA synthetases; G4 quadruplex nucleic acid binding protein
TI4896S004735	17/A02	0.54	SPAC20G4.04c	hus1	PCNA related protein; Hus1-Rad1-Rad9 checkpoint complex; involved in DNA replication checkpoint; involved in DNA damage checkpoint (required); involved in S/M checkpoint (required); sliding clamp and clamp-loading complex; interacts physically with Rad1p; interacts physically with Rad9p; interacts physically with Rad17p; phosphorylated in response to DNA damage
TI4896S002092	38/A09	0.54	SPBC2A9.04c		zinc finger protein; zf-C3HC4 type (RING finger); ubiquitin ligase (E3)
TI4896S000779	41/D07	0.54	SPCC576.11	rpl15	60S ribosomal protein L15
TI4896S002683	07/B04	0.54	SPBC16C6.05		conserved hypothetical; conserved protein; similar to human DENR/DRP density-regulated protein-a protein expressed at high cell density but not during growth arrest
TI4896S003418	27/A06	0.54	SPAC343.05	vma1	H(+)-ATPase; vacuolar ATP synthase (catalytic subunit A)
TI4896S000551	22/B01	0.54	SPCC584.09	spn6; SPCC188.12	septin; sporulation specific protein; GTP_cdc domain protein
TI4896S000631	02/D03	0.54	SPCC191.03c		very hypothetical protein; sequence orphan
TI4896S001399	39/B03	0.54	SPBC3D6.12		Trp Asp repeat protein WD repeat protein; Sc DIP2 is dom34 interacting protein; ribonucleoprotein (RNP) complex; processome component; involved in rRNA processing
TI4896S001897	51/G10	0.54	SPBC12C2.14c		very hypothetical protein
TI4896S004525	42/H03	0.54	SPAC27F1.03c	uch1	ubiquitin C-terminal hydrolase activity; similar to Sp uch2 (paralog)
TI4896S003957	35/A01	0.54	SPACUNK4.14		BRCT domain; no apparent Sc ortholog
TI4896S000384	30/G02	0.54	SPCC895.09c		RNA helicase; similar to pre-mRNA splicing factors at the C terminus; UBA domain
TI4896S000959	50/A10	0.54	SPBC660.07	ntp1	O-glycosyl hydrolase; neutral trehalase; alpha,alpha-trehalose glucohydrolase; glycosyl hydrolase family 37; involved in trehalose metabolism; involved in stress response (required); involved in sporulation (implicated); complexed with Tps1p; calcium binding protein
TI4896S003531	36/E07	0.54	SPAP14E8.02		hypothetical protein; FHA domain (phosphopeptide binding) (SMART); serine-rich protein
TI4896S002697	32/H10	0.54	SPBC1539.03c	argx	argininosuccinate lyase (putative); involved in arginine metabolism; arginine biosynthesis pathway (final step)
TI4896S001109	40/C03	0.54	SPBC354.12	gpd3	glyceraldehyde 3-phosphate dehydrogenase; similar to Sp SPBC32F12.11
TI4896S004989	45/F01	0.54	SPAC1039.01		amino acid permease family; similar to Sp SPBC15C4.04C and SPAPB24D3.02C and SPCC74.04 and SPAC11D3.08C and SPCC584.13 and SPAC9.10 and SPCC794.03
TI4896S001101	04/G02	0.53	SPBC354.04		hypothetical protein
TI4896S003127	12/D08	0.53	SPAC1687.16c		C-5 sterol desaturase; involved in ergosterol biosynthesis
TI4896S004261	46/F03	0.53	SPAC1142.03c	swi2; SPAC17G6.20c	involved in mating-type determination (required); no apparent orthologs
TI4896S000940	45/A10	0.53	SPBC1683.11c		isocitrate lyase
TI4896S002665	07/F08	0.53	SPBC16A3.04		conserved hypothetical protein
TI4896S002669	33/B05	0.53	SPBC16A3.01	spn3; SPBC543.01c	septin; involved in cytokinesis
TI4896S001848	18/F03	0.53	SPBC19G7.04		conserved hypothetical protein; involved in transcriptional regulation; HMG box
TI4896S001037	10/C01	0.53	SPBC106.15	idi1	isopentenyl-diphosphate delta-isomerase
TI4896S002888	09/G01	0.53	SPAC630.01c	SPAC12G12.02	hypothetical protein
TI4896S004861	23/C03	0.53	SPAC29A4.18		WD repeat protein; involved in chromatin assembly/disassembly; involved in transcriptional regulation; involved in chromatin silencing; acetyltransferase complex; involved in histone deacetylation; similar to Sp SPCC1672.10
TI4896S003672	22/E04	0.53	SPAC13D6.01		hypothetical protein; sequence orphan
TI4896S000734	20/B11	0.53	SPCC18.14c	rpp0	60s acidic ribosomal protein
TI4896S001221	50/A07	0.53	SPBC713.08		hypothetical protein
TI4896S001339	01/C03	0.53	SPBC409.14c		mitochondrial ribosomal protein S17
TI4896S000379	19/H06	0.53	SPCC895.04c	ufe1	SNARE; involved in secretory pathway; involved in retrograde transport from the golgi
TI4896S000179	30/E09	0.53	SPCC970.09	sec8	involved in secretory pathway, exocytosis, cytokinesis, cell separation
TI4896S001789	05/F05	0.53	SPBC14C8.08c		very hypothetical protein
TI4896S004479	02/F03	0.53	SPAC694.05c	rps2502; rps25-2; rps25	40S ribosomal protein S25 (S31)
TI4896S000357	09/E03	0.53	SPCC24B10.20		hypothetical short chain dehydrogenase
TI4896S004486	09/C08	0.53	SPAC1F7.06		fungal conserved protein; similar to Sp SPCC757.03C
TI4896S002252	28/A09	0.53	SPBC20F10.08c		hypothetical protein
TI4896S000431	06/H04	0.53	SPCC550.05		hypothetical protein; sequence orphan
TI4896S001873	20/D02	0.53	SPBC1921.02	rad60	involved in DNA repair; involved in double-strand break repair (required); predicted coiled-coil region; no apparent orthologs
TI4896S002988	04/F01	0.53	SPAC3H8.03		mitochondrial ribosomal protein
TI4896S002799	27/E08	0.53	SPAC11D3.11c	SPAC11D3.12c	possible pseudogene; 1 frameshift; putative transcriptional activator; zinc finger protein; similar to Sp SPCC757.04
TI4896S001644	23/G08	0.53	SPBC3H7.06c	pof9	F-box protein
TI4896S001902	16/H09	0.53	SPBC17F3.01c	rga5; SPBC557.01	GTPase activator; RhoGAP domain; overexpression lethal; non-essential; deletion mutant results in multiseptation at high temperatures; involved in cell morphogenesis (regulation); involved in cell wall biosynthesis (regulation); double mutant rga5delta/rga1delta unable to germinate (possibly); double mutant rga5delta/rga2,3, 4,and 6delta no apparent genetic interaction (Nakano et. al); specific R…
TI4896S002792	02/H09	0.53	SPAC11D3.04c		hypothetical protein; sequence orphan; has transcript profile on microarray
TI4896S000308	11/F02	0.53	SPCC2H8.04		sequence orphan; hypothetical protein
TI4896S004813	44/A04	0.53	SPAC1952.15c		hypothetical protein; sequence orphan
TI4896S003897	17/H04	0.52	SPAC6F6.11c		pyridoxal kinase
TI4896S003420	27/B10	0.52	SPAC343.07		RNA-binding protein; similar to Sp crp79
TI4896S001907	50/B10	0.52	SPBC557.06c	SPBC365.20c	pyrazinamidase/nicotinamidase
TI4896S004548	10/D12	0.52	SPAC1527.02	sft2	involved in intracellular protein transport; involved in ER to Golgi transport
TI4896S002883	22/C08	0.52	SPAC12G12.07c		hypothetical coiled-coil protein; no Sc ortholog; similar to A. thaliana T7N9.15; has domain similar to integrin-a cytoplasmic region
TI4896S003022	06/A12	0.52	SPAC22F3.11c		hypothetical protein; sequence orphan
TI4896S003795	42/H10	0.52	SPAC23H3.12c		hypothetical protein
TI4896S000633	07/C09	0.52	SPCC191.05c		conserved hypothetical protein; conserved in some bacteria; has transcript profile on microarray; no apparent Sc ortholog
TI4896S001273	04/D06	0.52	SPBC146.10		hypothetical protein
TI4896S001165	35/A07	0.52	SPBC119.10		asparagine synthetase
TI4896S003852	24/F06	0.52	SPAC4F8.14c	hcs1; hcs	3-hydroxy-3-methylglutaryl coenzyme A synthase; hydroxymethylglutaryl-coa synthase; involved in mevalonate synthesis; IQ calmodulin binding motifs; involved in ergosterol biosynthesis; (old-> hydroxymethylglutaryl-CoA synthase (EC 4.1.3.5))
TI4896S002688	32/F02	0.52	SPBC16C6.10	chp2	pleiotrophic transcriptional silencing protein; transcriptional repressor; chromodomain protein; chromo shadow domain; no apparent Sc ortholog; similar to Sp swi6 (paralog)
TI4896S000295	04/B10	0.52	SPCC1393.03	rps1501; rps15-1	40S ribosomal protein S15
TI4896S002374	45/F09	0.52	SPBC418.01c	his4; SPBC887.20c	bifunctional enzyme; 1-(5-phosphoribosyl)-5-[(5-phosphoribosylamino) methylideneamino]imidazole-4-carboxamide isomerase; involved in histidine biosynthesis (4th step); glutamine amidotransferase
TI4896S004984	46/H11	0.52	SPAC29B12.10c		OPT family oligopeptide transporter; involved in pheromone response; involved in mating-type determination
TI4896S000488	25/D06	0.52	SPCC338.15		dolichyl-di-phosphooligosaccharide-protein glycotransferase subunit; oligosaccharyltransferase; involved in N-linked glycosylation
TI4896S002185	15/D11	0.52	SPBC405.03c		conserved hypothetical protein
TI4896S004035	29/A03	0.52	SPAC16A10.01		conserved hypothetical; hypothetical protein; Sc YJL108C is regulated by pheromone
TI4896S002440	48/H09	0.52	SPBC13G1.10c		DEAD/DEAH box helicase; helicase C-terminal domain; Sec63 domain; involved in mRNA stability; involved in mRNA processing
TI4896S001943	14/G02	0.52	SPBC2G5.04c		COPII-coated vesicle component; predicted N-terminal signal sequence
TI4896S003066	22/C06	0.52	SPAC16C9.01c	SPAC4G8.14c	pfkB family carbohydrate kinase; involved in RNA processing; involved in structural stability of L-A double-stranded RNA-(dsRNA-) containing particles
TI4896S002606	45/C02	0.52	SPBC1861.09		ole inferred from homology; serine/threonine protein kinase
TI4896S002967	23/D07	0.52	SPAC2F7.04	pmc2	RNA polymerase II holoenzyme component; mediator complex subunit; involved in regulating RNA polymerase II activity; no apparent orthologs
TI4896S001761	45/G03	0.52	SPBC1711.10c		Cdc48-Ufd1-Npl4 complex component (putative); involved in ubiquitin-dependent proteolysis; involved in proteasomal processing; involved in the recognition of polyubiquitin-tagged proteins
TI4896S002240	11/H11	0.52	SPBC25H2.06c	hrf1	involved in intracellular protein transport; involved in ER to Golgi transport; interacts physically with SPCC61.04c; complexed with SPCC61.04c; COPII coated vesicle component
TI4896S000473	41/E03	0.52	SPCC1322.11	rpl2302; rpl23-2	60S ribosomal protein L23
TI4896S001821	25/C03	0.52	SPBC16H5.05c	cyp7; cwf27	cyclophilin; peptidyl-prolyl cis-trans isomerase; complexed with Cdc5p; involved in mRNA splicing; no apparent Sc ortholog
TI4896S004380	01/E08	0.52	SPAC2F3.07c		very hypothetical protein
TI4896S002902	28/H10	0.52	SPAC630.14c	tup1; tup12	eneral transcriptional repressor; transcriptional repressor functioning redundantly with Tup11p; WD repeat protein; histone binding
TI4896S003656	31/F08	0.52	SPAC1783.08c	rpl1502; rpl15-2	60S ribosomal protein (L15B subunit)
TI4896S000059	12/C09	0.51	SPCC1235.04c		FAD synthetase
TI4896S001509	39/G05	0.51	SPBC83.02c	rpl4302; rpl43; rpl43-2; rpl37a-2	60S ribosomal protein L43/L37A-2
TI4896S004323	01/D07	0.51	SPAC1F12.03c		very hypothetical protein; sequence orphan
TI4896S004511	13/B09	0.51	SPAC2C4.14c		serine/threonine protein kinase; sporulation specific
TI4896S002248	41/B09	0.51	SPBC20F10.04c		conserved hypothetical; hypothetical protein
TI4896S004230	11/G10	0.51	SPAC17A2.02c		conserved hypothetical protein
TI4896S003585	05/C08	0.51	SPAC607.03c	snu13; rph1?	putative pre-mRNA splicing factor
TI4896S004758	06/C01	0.51	SPAC4F10.19c		conserved eukaryotic protein; no apparent Sc ortholog
TI4896S001033	22/H09	0.51	SPBC106.11c		phospholipase A2; 1-alkyl-2-acetylglycerophosphocholine esterase; involved in glycerolipid metabolism; involved in lipid catabolism; no apparent Sc ortholog
TI4896S001524	51/H02	0.51	SPBC83.19c		very hypothetical protein
TI4896S003078	24/H04	0.51	SPAC2G11.06	vps4	AAA family ATPase; involved in intracellular protein transport; involved in endosomal maturation; class E vps; bam1/bed5 suppressor; MIT domain
TI4896S001207	40/G04	0.51	SPBC36.05c	clr6	transcriptional regulator; cryptic loci regulator; histone deacetylase activityj; NAD-independent histone deacetylase activity; RPD3-like (class I); involved in transcriptional regulation; involved in chromatin silencing; involved in chromatin assembly/disassembly; essential
TI4896S003930	14/B05	0.51	SPAC3F10.05c		sequence orphan; hypothetical protein
TI4896S002208	49/G08	0.51	SPBC776.13	cnd1	condensin subunit; essential; involved in chromosome condensation (required)
TI4896S004108	11/D06	0.51	SPAC6G9.05		Nudix family hydrolase; coenzyme A diphosphatase
TI4896S002400	10/G03	0.51	SPBP8B7.13		hypothetical protein; sequence orphan
TI4896S000374	12/G02	0.51	SPCC1795.04c		20S proteasome component (alpha 7)
TI4896S001573	17/C07	0.51	SPBC19C2.13c		conserved hypothetical protein
TI4896S002823	17/B08	0.51	SPAC13G6.05c		TRAPP; involved in intracellular protein transport; involved in ER to Golgi transport
TI4896S003931	26/B09	0.51	SPAC3F10.06c		initiator tRNA phosphoribosyl transferase
TI4896S001055	02/B09	0.51	SPBC428.04		very hypothetical protein; sequence orphan; non-essential
TI4896S002167	01/D08	0.51	SPBC1778.05c		hypothetical protein; sequence orphan; has transcript profile on microarray
TI4896S000253	12/B06	0.51	SPCC16C4.10		glucosamine-6-phosphate isomerase; 6-phosphogluconolactonase activity
TI4896S003241	16/D10	0.51	SPAC4C5.01		haloacid dehalogenase; similar to Sp SPCC1020.07 (paralog)
TI4896S002454	11/E02	0.50	SPBC31F10.12		conserved hypothetical; PUA domain; RNA-binding protein; involved in RNA modification
TI4896S004524	05/E09	0.50	SPAC27F1.02c	cdc8; fus4	tropomyosin; actin-binding protein; F-actin contractile ring component; essential; involved in contractile ring assembly (required); involved in cytokinesis (required); involved in actin assembly and function; involved in conjugation; involved conjugation with cellular fusion (required)
TI4896S003526	12/A04	0.50	SPAC140.04		sequence orphan; hypothetical protein; predicted coiled-coil region
TI4896S001843	05/G03	0.50	SPBC24C6.11	cwf14	G10 protein; complexed with Cdc5p; involved in mRNA splicing (implicated); involved in cell cycle regulation (implicated)
TI4896S001542	31/H11	0.50	SPBC28F2.06c	mdm12	involved in mitochondrial inheritance
TI4896S004331	20/G10	0.50	SPAC4H3.01		DNAJ domain protein
TI4896S000632	01/E01	0.50	SPCC191.04c		hypothetical protein
TI4896S004305	10/A12	0.50	SPAP7G5.01	SPAC15E1.10	hypothetical protein; sequence orphan
TI4896S002205	39/G12	0.50	SPBC776.11	rpl2801; rpl28-1	60S ribosomal protein lL28B 27A
TI4896S002226	42/G04	0.50	SPBC19F8.05		hypothetical protein; sequence orphan
TI4896S003430	37/G03	0.50	SPAC343.16		homoaconitate hydratase; involved in lysine biosynthesis; functionally complements lys2-97 (pers. comm. Richard Hoffman)
TI4896S002808	41/D12	0.50	SPAC5H10.03		phosphoglycerate mutase family; similar to Sp SPAC513.02; no apparent Sc ortholog
TI4896S001883	43/E05	0.50	SPBC21D10.08c		sequence orphan; hypothetical protein
TI4896S002268	35/H02	0.50	SPBC17D1.06		DEAD/DEAH box helicase; ATP-dependent; RNA helicase
TI4896S003330	20/C12	0.50	SPAC3A12.11c	cwf2; prp3	involved in mRNA splicing; zinc finger protein; zf-CCCH type; RNA-binding protein; rrm RNA recognition motif; RNP-containing protein; 40S snRNP-containing complex; nineteen complex (Ntc); complexed with Cdc5p; interacts physically with Cdc5p; interacts physically with Cwf8p; mutant (prp3-1) accumulates unspliced mRNAs
TI4896S001884	02/F04	0.50	SPBC21D10.07		very hypothetical protein
TI4896S003578	04/G09	0.50	SPAC17H9.16		mitochondrial outer membrane translocase complex; involved in mitochondrial outermembrane protein import; mitochondrial import receptor
TI4896S000771	06/C07	0.50	SPCC576.03c		thioredoxin peroxidase
TI4896S002895	12/D07	0.50	SPAC630.08c		C-4 methyl sterol oxidase; involved in ergosterol biosynthesis; sterol desaturase domain
TI4896S002884	17/A10	0.50	SPAC12G12.06c		RNA 3'-terminal phosphate cyclase
TI4896S003256	43/A01	0.50	SPAC10F6.12c	mam4	protein-s isoprenylcysteine o-methyltransferase; farnesyl cysteine carboxyl methyltransferase that modifies M-factor; cells defective in mam4 do not secrete active mating pheromone M-factor
TI4896S001581	17/E06	0.50	SPBC2F12.10		mitochondrial ribosomal protein; phosphatidylethanolamine-binding family; involved in peptidase inhibition
TI4896S002531	44/G01	0.50	SPBC26H8.08c		GTPase; involved in RNA processing
TI4896S002419	32/D10	0.50	SPBP8B7.32c	puc1; SPBC19F5.01c	G1-type cyclin; involved in exit from the mitotic cycle
TI4896S000728	25/F05	0.50	SPCC18.08		lysyl-tRNA synthetase; involved in lysyl-tRNA aminoacylation; lysine-tRNA ligase activity
TI4896S003719	06/F04	0.50	SPAC17G8.03c		involved in transcriptional regulation; DNA-binding protein; basal inhibitor of class II transcription; possibly binds to TBP and represses RNAP II during assembly of the pre-initiation complex
TI4896S003121	38/G06	0.49	SPAC1687.11	pmt2	RNA methyltransferase; potential SAM-dependent enzyme; involved in rRNA processing
TI4896S000421	46/D05	0.49	SPCC4B3.03c		conserved hypothetical protein; involved in mitochondrial maintenance; CBS domain protein; DUF21
TI4896S003509	41/H08	0.49	SPAPB1A10.02		sequence orphan; hypothetical protein
TI4896S004530	21/A01	0.49	SPAC27F1.07		dolichyl-diphospho-oligosaccharide-protein glycosyltransferase activity; oligosaccharyl transferase complex; involved in N-linked glycosylation; GPI anchored protein; glycoprotein
TI4896S000402	45/E12	0.49	SPCC1259.12c		SPRY domain; CTLH domain; similar to human ranbpm; involved in vacuolar import and degradation
TI4896S001447	33/F05	0.49	SPBC8D2.10c		zinc finger protein (inferred from context); zf-C2H2 type; arginine N-methyltransferase; no apparent Sc ortholog (has homologs)
TI4896S000945	09/B09	0.49	SPBC1198.03c		hypothetical protein; sequence orphan
TI4896S004830	02/B04	0.49	SPAC22E12.08		upstream activation factor complex; involved in activation of RNA polymerase I
TI4896S000707	20/C07	0.49	SPCC737.04	B8647-5	Sp specific families; Pfam-B_8647 domain
TI4896S001605	18/G03	0.49	SPBC18H10.06c		SET1 complex (TAP); involved in transcriptional silencing; involved in regulation of chromatin remodelling; WD repeat protein; similar to Sp SPAC824.04 (paralog)
TI4896S001204	35/G07	0.49	SPBC36.02c		unknown specificity; transporter; similar to Sp SPAC11D3.05 and SPCC794.04C and SPCC569.05C and SPBC36.03C and SPBC36.01C and SPBC530.15C and SPBC530.02 and SPBC947.06C; involved in amine/polyamine transport; tandem duplication
TI4896S000029	26/G02	0.49	SPCC613.12c		WD repeat protein; similar to N.crassa B13I18.130; no apparent Sc ortholog
TI4896S001243	36/F12	0.49	SPBC646.11	cct6	chaperonin-containing T-complex; T-complex protein 1 (zeta subunit); chaperone; involved in protein folding; involved in actin folding; involved in tubulin folding
TI4896S000973	17/H12	0.49	SPBC31E1.04	pep12	SNARE predicted; Has a role in vesicle-mediated transport but not with protein transport from Golgi to vesiscle; Belongs to the syntaxin/epimorphin family; Contains 1 t-SNARE coiled-coil homology domain; similar to S. cerevisiae YOR036W
TI4896S002309	01/H08	0.49	SPBC4B4.12c		very hypothetical protein
TI4896S004376	20/D11	0.49	SPAC2F3.03c	rpa49	DNA-directed RNA polymerase I (subunit)
TI4896S002728	08/F06	0.49	SPBP4G3.03		hypothetical protein; sequence orphan
TI4896S004702	11/B02	0.49	SPAPYUG7.05		delta 1-pyrroline-5-carboxylate reductase; involved in proline biosynthesis (3rd step)
TI4896S004800	23/D09	0.49	SPAC1952.01	SPAC1B3.19	GPI-anchor transamidase complex (5th subunit); involved in GPI anchor biosynthesis; eukaryotic conserved protein
TI4896S004534	16/F02	0.48	SPAC23D3.02	rfc2	AAA family ATPase; replication factor C (activator 1 subunit); involved in DNA replication; activator of DNA polymerases
TI4896S000534	18/A12	0.48	SPCC11E10.02c	gpi8	GPI-anchor transamidase activity; GPI-anchor transamidase complex; peptidase family C13; essential; involved in GPI anchor biosynthesis; involved in attachment of GPI anchor to protein (required); functionally complements S. cerevisiae GPI8
TI4896S002369	11/H12	0.48	SPBC887.15c		sterol desaturase; involved in sphingolipid metabolism
TI4896S001284	40/D01	0.48	SPBC337.08c	ubi4	ubiquitin family protein; involved in meiosis (required)
TI4896S002158	04/C09	0.48	SPBC30D10.06	lsm4	U6 snRNA-associated protein; involved in mRNA splicing; Sm domain
TI4896S002721	46/H02	0.48	SPBC8E4.06	SPBC1289.16c	copper amine oxidase; no apparent Sc ortholog
TI4896S002181	01/D12	0.48	SPBC4C3.04c		guanine nucleotide exchange factor
TI4896S003128	08/H12	0.48	SPAC1687.17c		Der1-like (degradation in the ER) family; no apparent Sc ortholog; non-essential
TI4896S004085	28/E11	0.48	SPAC1486.03c		G-patch domain; putative septin interacting by similar to D. melanogaster SIP1; no apparent Sc ortholog
TI4896S000196	29/C06	0.48	SPCP31B10.07	eft202	experimentally characterised; elongation factor 2; identical to Sp eft201 (paralog)
TI4896S002955	20/A03	0.48	SPAC227.09		folylpolyglutamate synthase
TI4896S004282	27/G04	0.48	SPAC15A10.01	SPAC8C9.18	ABC family; membrane transporter
TI4896S004038	16/F09	0.48	SPAC16A10.04	rho4	Rho family; small GTPase; similar to Sp SPAC20H4.11c (paralog); non-essential; involved in cellular morphogenesis; involved in cytokinesis; involved in septation; involved in regulation of the actin cytoskeleton; involved in cell wall organization and biogenesis (IGI)
TI4896S000897	28/G06	0.48	SPCP1E11.01c	SPCC1827.07c	EXS family; involved in signal transduction
TI4896S001314	45/F04	0.48	SPBC1709.06		dihydrouridine synthase; involved in tRNA modification
TI4896S003429	22/F11	0.48	SPAC343.15		tRNA isopentenyltransferase
TI4896S002954	07/F09	0.48	SPAC227.08c		zf-CCCH type zinc finger protein; involved in polyadenylation
TI4896S001201	33/C06	0.48	SPBC530.14c	dsk1	serine/threonine protein kinase; cell cycle stage dependent phosphorylation and localization; mitotic regulator; involved in mRNA splicing
TI4896S002608	26/B03	0.48	SPBC14F5.02		sequence orphan; hypothetical protein
TI4896S002019	13/A11	0.48	SPBC685.06	rps001; rps0-1; rpsa-1	40S ribosomal protein S0 (p40)
TI4896S002676	31/H06	0.48	SPBC543.08		involved in inositol phospholipid biosynthesis
TI4896S004909	26/H04	0.48	SPAC14C4.07		transporter; unknown specificity
TI4896S003744	17/E10	0.48	SPAC15F9.02		WD repeat protein; nuclear pore complex; involved in nuclear transport
TI4896S003248	16/B05	0.48	SPAC10F6.04		alpha-tubulin suppressor; regulator of condensation (RCC1) domains
TI4896S003124	01/B02	0.48	SPAC1687.14c		low similarity to caltractin; centrin; EF-hand motif; no apparent Sc ortholog
TI4896S001755	17/G06	0.48	SPBC1711.04		methylenetetrahydrofolate reductase; involved in methionine metabolism
TI4896S004654	44/E02	0.48	SPAC30C2.06c		involved in mitochondrial genome maintenance; similar to D. melanogaster mst2; Sc YMR211W is null lethal
TI4896S002690	21/G08	0.48	SPBC16C6.12c		involved in cellular morphogenesis; involved in actin cytoskeletal organization (regulation); involved in cell polarity
TI4896S000816	28/C02	0.48	SPCC830.03		eukaryotic conserved protein; Sc YLL035W is null lethal; Sc YLL035W is predicted to interact with LAS1; involved in cell growth; ATP/GTP-binding (prosite)
TI4896S000754	13/F04	0.48	SPCC1739.05		SET domain; histone lysine methyltransferase
TI4896S001916	12/F11	0.48	SPBC365.09c		conserved hypothetical; zinc finger protein; zf-C2H2 type
TI4896S004711	26/A01	0.47	SPAC1782.08c		exonuclease
TI4896S001091	29/C04	0.47	SPBC1685.14c		conserved hypothetical; hypothetical protein; non-essential
TI4896S003266	36/G04	0.47	SPAC56E4.06c		gamma-glutamyltranspeptidase; similar to Sp SPAC664.09
TI4896S004622	26/C11	0.47	SPAC637.09		ribonuclease H
TI4896S003401	14/D08	0.47	SPAP27G11.04c		tRNA-specific adenosine-34 deaminase subunit
TI4896S001595	21/H02	0.47	SPBC11G11.02c	end3	actin cortical patch component; involved in endocytosis; EF hand motif; calcium binding protein
TI4896S003697	40/G05	0.47	SPAC13G7.02c	hsp70	heat shock protein 70 family; similar to Sp SPCC1739.13 (paralog)
TI4896S002491	09/A01	0.47	SPBC211.01	SPBC23E6.11	mitochondrial ribosomal protein S10
TI4896S002873	18/G09	0.47	SPAC18B11.02c		DRAP deaminase activity; pseudouridylate synthase activity; involved in riboflavin biosynthesis
TI4896S002043	46/D07	0.47	SPBC19C7.08c		leucine carboxyl methyltransferase
TI4896S002414	28/H03	0.47	SPBP8B7.27		ubiquitin-protein ligase (E3); HECT domain; zinc finger protein; zf-UBP type
TI4896S003718	14/E01	0.47	SPAC17G8.02		uridine ribohydrolase; involved in pyrimidine degradation; similar to Sp SPBC1683.06c (paralog)
TI4896S003486	05/A07	0.47	SPAC1002.06c		hypothetical protein; sequence orphan
TI4896S002329	03/G11	0.47	SPBC1718.03		nucleolar protein; hypothetical coiled-coil protein; interacts with RNA polymerase I
TI4896S000836	25/H12	0.47	SPCC1919.11		conserved hypothetical; src (SH3) homology domain; no apparent Sc ortholog
TI4896S001474	49/E07	0.47	SPBP22H7.02c	pi029; SPACTOKYO_453.05c	RNA-binding protein; rrm RNA recognition motif; involved in ribosome biogenesis and assembly
TI4896S003239	24/H08	0.47	SPAC22A12.16		ATP-citrate synthase (subunit 2) (similar to ATP-citrate synthase N-terminal domain); involved in tricarboxylic acid cycle; involved in citrate metabolism; involved in ATP catabolism; involved in acetyl CoA biosynthesis; involved in fatty acid biosynthesis; ATP citrate synthase activity; no apparent Sc ortholog
TI4896S002925	34/E04	0.47	SPAC13C5.05c		N-acetylglucosamine-phosphate mutase (putative)
TI4896S002239	39/G10	0.46	SPBC25H2.07	tif11	eukaryotic translation initiation factor 1A; translation initiation factor (1a subunit)
TI4896S001623	42/G10	0.46	SPBC9B6.06		mitochondrial ribosomal protein L15 family (L10)
TI4896S003534	01/E05	0.46	SPAP14E8.05c		conserved eukaryotic protein; UPF0136
TI4896S003604	11/F07	0.46	SPAC3C7.10		src (SH3) homology domain; interacts physically with Pex5p and Pex14p
TI4896S002138	04/E02	0.46	SPBC13E7.04	atp16	F1-ATPase (delta subunit); ATP synthesis coupled proton transport
TI4896S001006	32/B09	0.46	SPBP26C9.02c	car1	arginase; involved in arginine catabolism to ornithine
TI4896S001712	42/E05	0.46	SPBC29A3.07c		hypothetical RNA-binding proteinRNA-binding protein; involved in mRNA splicing; no apparent Sc ortholog; rrm RNA recognition motif
TI4896S000207	25/E07	0.46	SPCC1672.03c		guanine deaminase
TI4896S000475	34/G10	0.46	SPCC1322.13	ade6; min1	phosphoribosylaminoimidazole carboxylase; AIR carboxylase; involved in purine biosynthesis
TI4896S000878	05/E04	0.46	SPCC1494.09c		hypothetical protein; sequence orphan
TI4896S001477	49/G05	0.46	SPBP22H7.05c	pi026; SPACTOKYO_453.08	possibly I TAT-binding protein homolog; AAA family ATPase; bromodomain protein; similar to Sp SPAC31G5.19 (paralog)
TI4896S002004	17/H10	0.46	SPBC336.05c		hypothetical protein; Pfam-B PB009048 domain; no apparent Sc ortholog
TI4896S004949	34/E06	0.46	SPAP8A3.13c		sequence orphan; hypothetical protein
TI4896S003422	19/F04	0.46	SPAC343.09		involved in glycogen metabolism; UBX domain (4others)
TI4896S000383	23/G05	0.46	SPCC895.08c		hypothetical protein; sequence orphan
TI4896S001749	27/D03	0.46	SPBC23G7.13c		urea transporter
TI4896S000039	43/H08	0.46	SPCC330.10	pcm1	mRNA capping methyltransferase; methylates the terminal guanine residue of the mRNA cap
TI4896S002859	29/C12	0.46	SPAC1F5.06		heat shock protein 70 family; chaperone
TI4896S003759	17/D11	0.46	SPAC6B12.11		involved in DNA replication
TI4896S002095	10/F10	0.46	SPBC2A9.07c		hypothetical protein; sequence orphan
TI4896S000100	51/D01	0.46	SPCC553.05	wtf6; wtf2-pseudo	pseudogene wtf element Wtf6
TI4896S002343	44/H07	0.46	SPBC1105.07c		conserved eukaryotic protein; PINT/PCI domain
TI4896S000229	08/H10	0.46	SPCC31H12.03c		DNA-binding protein (putative); SAP domain; Sc homolog is suppressor of the transcriptional defect of Hpr1p
TI4896S002493	30/G11	0.46	SPBC211.03c		guanyl-nucleotide exchange factor activity; Sec7 domain; similar to S. cerevisiae YJR031C and YEL022W
TI4896S004703	06/B10	0.46	SPAPYUG7.06		DUF862; conserved eukaryotic protein; human homolog PNAS-4 is acute promyelocytic leukemia cell line NB4's apoptosis-related gene; no apparent Sc ortholog
TI4896S000877	10/F11	0.46	SPCC1494.08c		hypothetical protein
TI4896S002184	20/G08	0.45	SPBC405.02c	SPBC4C3.01	hypothetical protein; serine/proline rich protein; sequence orphan
TI4896S003626	03/E10	0.45	SPAC23C11.02c	rps23	40S ribosomal protein S23
TI4896S004859	35/G01	0.45	SPAC29A4.20		RNA polymerase II holoenzyme component; histone acetyltransferase
TI4896S000418	06/G01	0.45	SPCC4B3.06c		NADPH-dependent FMN reductase
TI4896S003416	05/E08	0.45	SPAC343.03		anaphase-promoting complex (APC); involved in cyclin degradation (required); involved in metaphase-anaphase transition (required); zinc finger protein; zf-C3HC4 type (RING finger); ubiquitin ligase (E3); conserved eukaryotic protein
TI4896S004006	40/A10	0.45	SPAC31G5.12c	n150	negative regulator of RNA polymerase
TI4896S002976	14/D02	0.45	SPAC2F7.14c		exosome (RNase complex); involved in rRNA processing
TI4896S001594	06/E11	0.45	SPBC11G11.01		TPR repeat protein; involved in mitochondrial division
TI4896S001544	37/E08	0.45	SPBC28F2.08c		SEL1 repeat protein; involved in proteolysis; ubiquitin system
TI4896S000263	49/C07	0.45	SPCPJ732.02c		xylulose kinase; FGGY family
TI4896S004026	39/E08	0.45	SPAC24C9.07c	bgs2; meu21	1,3-beta-glucan synthase subunit; glycosyl transferase family 48; involved in sporulation; involved in spore wall assembly; involved in the synthesis of a spore cell wall beta (1,3) glucan component; meiotic expression upregulated; sporulation specific; similar to Sp SPCC1840.02c and SPBC19G7.05c and SPAC19B12.03
TI4896S002639	14/F01	0.45	SPBC16G5.10		exosome (RNase complex); involved in rRNA processing
TI4896S003739	26/H05	0.45	SPAC22H10.09		sequence orphan; hypothetical protein
TI4896S004632	37/B03	0.45	SPAC12B10.05		metallopeptidase
TI4896S001030	12/B03	0.45	SPBC106.08c	B13958-1	Sp specific families; B13958 domain; non-essential
TI4896S004411	38/E10	0.45	SPAC19G12.02c	pms1	involved in DNA repair; involved in mismatch repair; MMR pathway; mismatch-binding; mutL homolog
TI4896S001335	12/D01	0.45	SPBC409.10	ade7	phosphoribosylamidoimidazole-succinocarboxamide synthase (putative); SAICAR synthetase; involved in nucleotide metabolism; involved in purine biosynthesis
TI4896S001001	44/F10	0.45	SPBC1773.13		aromatic aminotransferase; similar to Sp SPCC569.07 and SPAC56E4.03
TI4896S004143	14/A12	0.45	SPAC26A3.06		conserved hypothetical; methyltransferase
TI4896S003385	47/D12	0.45	SPAC23H4.14	vps39	CNH domain; involved in intracellular protein transport; involved in vacuole fusion
TI4896S003220	01/E04	0.45	SPAC56F8.13		very hypothetical protein
TI4896S003004	46/C08	0.45	SPAC1F3.09		hypothetical protein; conserved protein
TI4896S004771	12/A03	0.45	SPAC19B12.12c	yip11; yip1; yip1-a	possibly involved in spliceosomal snRNP biogenesis; structural similarity with SMN protein; smn1/yab8 interacting protein based on 2 hybrid data and similar to human SIP1; involved in spliceosomal snRNP biogenesis; similar to Sp yip12 (paralog); duplicated in Sp; telomerase associated (implicated); no apparent Sc ortholog
TI4896S003075	26/C08	0.44	SPAC2G11.03c	vps45	sec1 family; SNARE binding activity; SNARE docking complex (TRAPP?); involved in non-selective vesicle docking; syntaxin binding protein; involved in intracellular protein transport; involved in secretory pathway; involved in exocytosis; involved in non-selective vesicle docking; involved in ER to golgi transport
TI4896S003323	43/B08	0.44	SPAC3A12.04c		RNase P subunit; involved in tRNA maturation
TI4896S003633	29/F10	0.44	SPAC23C11.09		alanine-tRNA ligase; involved in alanyl-tRNA aminoacylation; alanine-tRNA ligase activity
TI4896S004216	10/D08	0.44	SPAC16E8.10c		mitochondrial ribosomal protein S7
TI4896S004277	12/F05	0.44	SPAC8C9.12c		mitochondrial carrier; involved in mitochondrial import; involved in iron homeostasis
TI4896S004696	22/E09	0.44	SPAC458.06		WD repeat protein
TI4896S004222	11/D12	0.44	SPAC16E8.15	tif1; tif45	translation initiation factor (4E subunit); cap binding component eIF4E
TI4896S002096	01/B07	0.44	SPBC2A9.13		hypothetical protein; sequence orphan
TI4896S002725	02/H07	0.44	SPBC8E4.02c		hypothetical protein; sequence orphan
TI4896S000471	25/D10	0.44	SPCC1322.09		conserved hypothetical; hypothetical protein; similar to N. crassa NCU02899.1; no apparent Sc ortholog
TI4896S004708	16/C02	0.44	SPAC1782.05		Sc RRD2 is involved in rapamycin sensitivity and cell cycle progression; similar to phosphotyrosyl phosphatase activator
TI4896S001579	36/C12	0.44	SPBC2F12.12c		hypothetical protein; interacts with ankyrin repeat containing protein by similarity to D.melanogaster cactin; no apparent Sc ortholog; non-essential
TI4896S003342	11/A08	0.44	SPAC9.06c		similar to enterobacterial L-ribose-5-phosphate 4-epimerases
TI4896S002813	11/B08	0.44	SPAC5H10.08c		pantoate--beta-alanine ligase; involved in pantothenate biosynthesis (last step); possibly coexpressed with SPAC5H10.09c which is also involved in pantothenate biosynthesis
TI4896S001722	26/B01	0.44	SPBC29A3.17		RhoGEF; guanine nucleotide exchange factor; similar to Sp gef1; no apparent Sc ortholog
TI4896S000691	01/H11	0.44	SPCC1223.05c	rpl3702; rpl37-2; rpl37	60S ribosomal protein L37
TI4896S001452	32/E10	0.44	SPBC8D2.15		lipoic acid synthetase
TI4896S002983	08/F07	0.44	SPAC13A11.03		hypothetical coiled-coil protein; involved in DSB repair
TI4896S000337	23/G09	0.44	SPCC16A11.16c		membrane glycoprotein; ARM1 family; no apparent Sc ortholog
TI4896S002912	04/E06	0.44	SPAC31A2.08		mitochondrial 60S ribosomal; L23 family
TI4896S004453	30/D10	0.44	SPAC26H5.12		DNA-directed RNA polymerase
TI4896S000373	06/B11	0.44	SPCC1795.05c		uridylate kinase
TI4896S001823	39/F05	0.43	SPBC16H5.03c	uba2	ubiquitin-activating enzyme E1-like ubiquitin activating enzyme; e1-like
TI4896S003685	14/C03	0.43	SPAC4G9.10	arg3	ornithine carbamoyltransferase; involved in arginine biosynthesis
TI4896S001035	23/A11	0.43	SPBC106.13		eukaryotic conserved hypothetical protein; LisH domain; CTLH domain
TI4896S003076	12/E01	0.43	SPAC2G11.04		conserved hypothetical; G-patch domain
TI4896S003286	11/F06	0.43	SPAC6F12.07		mitochondrial outer membrane translocase complex; involved in mitochondrial outer membrane protein import; mitochondrial import receptor; involved in the organization of Tom40p dimers into TOM structures
TI4896S003368	47/C08	0.43	SPAC57A7.06		ribonucleoprotein (RNP) complex; small subunit (SSU) processome component; involved in rRNA processing; predicted coiled-coil protein; predicted ATP/GTP binding (prosite)
TI4896S001646	07/F05	0.43	SPBC3H7.04		superoxide dismutase; similar to Sp SPBC16A3.14
TI4896S001185	29/E03	0.43	SPBC577.13		inositol polyphosphate phosphatase family
TI4896S000498	05/H07	0.43	SPCC338.04	cid2	caffeine induced death protein; involved in DNA replication checkpoint
TI4896S001064	43/A08	0.43	SPBC428.13c	mob1	SIN component; involved in cytokinesis (required); involved in septation; interacts physically with Sid2p; essential; protein kinase regulator Mob1; maintenance of ploidy protein Mob1; Sid2p-Mob1p kinase complex; Mob1/phocein family
TI4896S004081	08/A09	0.43	SPAC3G9.15c		eukaryotic conserved protein
TI4896S004961	14/G06	0.43	SPAC4D7.11		sequence orphan; hypothetical protein
TI4896S004594	24/D09	0.43	SPAC17C9.07		glucosyltransferase; dolichyl pyrophosphate; involved in dolichol-linked oligosaccharide biosynthesis
TI4896S003304	04/E07	0.43	SPAC57A10.06		hypothetical protein; sequence orphan; has transcript profile on microarray
TI4896S003814	13/D08	0.43	SPAC4A8.09c	cwf21	involved in mRNA splicing; spliceosome component; complexed with Cdc5p; RNA-binding protein (inferred from context); no apparent Sc ortholog
TI4896S003265	07/C10	0.43	SPAC56E4.05		conserved hypothetical protein
TI4896S002470	10/C06	0.43	SPBC21C3.10c		5-amino-6-(5-phosphoribosylamino) uracil reductase; htp reductase
TI4896S004684	43/E12	0.43	SPAC1834.09		sequence orphan; hypothetical protein
TI4896S003867	36/C10	0.43	SPAC644.06c	nim1; cdr1	regulator of Wee1p kinase; serine/threonine protein kinase; involved in mitosis (induction); involved in the regulation of CDK activity
TI4896S002791	12/E07	0.43	SPAC11D3.03c		conserved hypothetical protein; similar to D. melanogaster CG10208; no apparent Sc ortholog
TI4896S000902	44/E09	0.43	SPCP1E11.05c		sterol O-acyltransferase
TI4896S003449	24/D11	0.43	SPAC664.08c		protein transport protein
TI4896S003709	05/B05	0.43	SPAC6C3.02c		eukaryotic conserved protein
TI4896S004993	38/G08	0.43	SPAC1039.05c		fungal conserved protein; zinc finger protein; zf-C2H2 type; similar to Sp zas1 (paralog)
TI4896S001466	32/E02	0.43	SPBC17A3.09c	pi037	lipoate-protein ligase A
TI4896S003639	48/C01	0.43	SPAC23C11.15	pst2	transcriptional regulator; sin3 family corepressor; similar to Sp pst1 (paralog); essential; involved in retroelement propagation (required); involved in transcriptional regulation; involved in chromatin silencing; involved in chromatin assembly/disassembly; acetyltransferase complex; involved in histone deacetylation
TI4896S000685	48/F04	0.43	SPCC285.16c	msh6	MutS family; involved in DNA repair; involved in mismatch repair; interacts physically with Msh2p
TI4896S004840	16/A06	0.43	SPAC22E12.18		conserved hypothetical protein
TI4896S002021	02/A06	0.43	SPBC685.08		hypothetical protein; sequence orphan
TI4896S000121	01/G10	0.42	SPCC594.03		very hypothetical protein
TI4896S000245	34/F05	0.42	SPCC16C4.02c		sequence orphan; hypothetical protein
TI4896S003840	28/C07	0.42	SPAC7D4.11c		hypothetical protein; similar to N. crassa 15E6.130; no apparent Sc ortholog
TI4896S004997	35/H09	0.42	SPAC1039.09	isp5	involved in sexual differentiation; amino acid permease family; similar to Sp SPAP7G5.06 and SPAC869.11 and SPBC359.01 and SPBC359.01 and meu22 and SPBPB2B2.01
TI4896S000786	17/E03	0.42	SPCC126.01c	SPCC576.18c	conserved hypothetical; WD repeat protein
TI4896S000093	45/B03	0.42	SPCC553.12c	SPCC794.13	low similarity to NADH dehydrogenase subunit 2 by multiple alignment; no apparent Sc ortholog
TI4896S001327	09/G07	0.42	SPBC409.02c	SPBC1709.19c	conserved NifU-like protein; involved in ion homeostasis
TI4896S001944	27/F10	0.42	SPBC2G5.05		transketolase; involved in pentose -phosphate shunt, non-oxidative branch
TI4896S001875	02/C12	0.42	SPBC1921.04c		very hypothetical protein
TI4896S002689	39/G09	0.42	SPBC16C6.11	rpl3201; rpl32-1	60S ribosomal protein L32
TI4896S004628	31/A07	0.42	SPAC12B10.01c	SPAC31F12.02c; SPAC637.15c	DEAD/DEAH box helicase
TI4896S001837	12/F03	0.42	SPBC24C6.05	sec28	coatomer (epsilon subunit); COPE family;TPR repeat protein; The coatomer is a cytosolic protein complex that binds to dilysine motifs and reversibly associates with Golgi non- clathrin-coated vesicles, which further mediate biosynthetic protein transport from the ER, via the Golgi up to the trans Golgi network. Coatomer complex is required for budding from Golgi membranes, and is essential for th…
TI4896S001368	05/F08	0.42	SPBC725.13c		GINS complex; involved in DNA repair; eukaryotic conserved protein
TI4896S004680	35/G06	0.42	SPAC1834.05		glycosyl transferase family 22; mannosyltransferase; involved in N-linked glycosylation
TI4896S003645	12/H02	0.42	SPAC13F5.04c		very hypothetical protein
TI4896S002045	45/A08	0.42	SPBC19C7.10		conserved hypothetical; APSES domain; DNA-binding protein; serine-lysine rich protein; no apparent Sc ortholog
TI4896S004489	15/E06	0.42	SPAC1F7.09c		allantoicase
TI4896S000487	35/G10	0.42	SPCC338.16	pof3	F-box protein; TPR repeat protein; involved in genome integrity (required) and telomere maintenance (required)
TI4896S002381	19/E07	0.42	SPBC16D10.06		ZIP zinc transporter domain
TI4896S003309	15/A01	0.42	SPAC57A10.11c		conserved hypothetical; hypothetical protein
TI4896S000671	13/F03	0.42	SPCC285.02c	SPCC1442.17c	conserved hypothetical protein; DUF292
TI4896S001707	32/G01	0.42	SPBC29A3.02c	his7	phosphoribosyl-AMP cyclohydrolase; involved in histidine metabolism
TI4896S001520	43/E04	0.42	SPBC83.13		mitochondrial carrier; involved in mitochondrial transport; unknown specificity
TI4896S004370	26/G01	0.42	SPAC323.06c	uba5	ubiquitin activating enzyme
TI4896S001082	47/F09	0.42	SPBC1685.05		serine protease; non-essential
TI4896S003979	06/E05	0.42	SPAC2E1P3.05c		hypothetical protein; fungal cellulose binding domain; GPI anchored protein; glycoprotein
TI4896S002204	37/E04	0.42	SPBC776.10c		golgi transport complex (peripheral subunit); involved in intracellular protein transport; involved in secretory pathway; involved in ER to golgi transport
TI4896S000859	15/F11	0.41	SPCC965.06		potassium channel subunit ???; Aldo/keto reductase; no apparent Sc ortholog
TI4896S001857	23/E08	0.41	SPBC19G7.13		Myb family; DNA binding protein; involved in telomere maintenance; involved in telomerase-dependent telomere maintenance
TI4896S002537	20/D05	0.41	SPBC32C12.03c		serine/threonine protein kinase; kin1-like; no apparent orthologs
TI4896S003193	11/D05	0.41	SPAC1A6.08c		sequence orphan; hypothetical protein
TI4896S000184	44/B01	0.41	SPCC970.04c		phosphoprotein; involved in cell polarity; involved in cell cycle progression; essential; involved in bipolar growth; interacts physically with Orb6p
TI4896S000596	04/E04	0.41	SPCC777.17c		hypothetical protein; ribosomal protein L9 N-terminal domain; no apparent Sc ortholog
TI4896S000797	14/H02	0.41	SPCC126.12		conserved hypothetical; DUF34; UPF035
TI4896S000201	26/A09	0.41	SPCC962.03c	cut15	alpha-importin/karyopherin; serine rich RNA polymerase I suppressor; involved in mitosis; involved in chromosome condensation (required); armadillo repeat protein; similar to Sp SPBC1604.08C
TI4896S004011	10/H03	0.41	SPAC31G5.16c	dpm1	dolichol-phosphate mannosyltransferase; involved in GPI anchor biosynthesis
TI4896S004995	20/G12	0.41	SPAC1039.07c		aminotransferase class-III pyridoxal-phosphate; 2,2-dialkylglycine decarboxylase; no apparent Sc ortholog
TI4896S000155	19/D06	0.41	SPCC4G3.16		drap deaminase; involved in riboflavin biosynthesis; RLU family pseudouridine synthase
TI4896S001325	26/C12	0.41	SPBC1709.17		folypolyglutamate synthase
TI4896S000566	18/G05	0.41	SPCC1753.03c	rec7	involved in meiotic recombination (required); transcription meiotically induced; involved in early meiotic recombination events; deletion mutant results in frequent occurrence of two-spored asci; deletion mutant results in frequent nondisjunction of homologous chromosomes at the first meiotic division; opposite strand transcripts detected
TI4896S001606	09/B05	0.41	SPBC18H10.07		small nuclear ribonucleoprotein; no apparent Sc ortholog
TI4896S003333	06/C03	0.41	SPAC3A12.14	cam1	calmodulin; EF hand motifs; calcium binding protein; essential; involved in chromosome segregation (required)
TI4896S001292	40/A09	0.41	SPBC337.16	cho1	phospholipid methyltransferase; phosphatidyl-N-methylethanolamine N-methyltransferase; involved in phosphatidylcholine biosynthesis; phosphatidyl-N-methylethanolamine N-methyltransferase activity
TI4896S001947	26/D02	0.41	SPBC2G5.08	SPBC25B2.01	elongation factor 1 alpha
TI4896S001043	37/F08	0.41	SPBC582.02	exo70; SPBC106.20	involved in secretory pathway; involved in exocytosis; non-essential
TI4896S002706	32/G04	0.41	SPBC1289.02c	uap2	U2 snRNA-associated protein; involved in mRNA splicing; RNA-binding protein; rrm RNA recognition motif
TI4896S003345	28/C05	0.41	SPAC9.09		homocysteine methyltransferase; involved in methionine biosynthesis
TI4896S001386	32/B04	0.41	SPBC31A8.01c	cwl1; rtn1; SPBC651.13c	reticulon-like protein; overexpression results in cell lysis
TI4896S001760	11/H07	0.41	SPBC1711.09c		conserved hypothetical protein
TI4896S000814	31/B02	0.41	SPCC830.01c	SPCC1620.14c	SNF2 family; helicase C-terminal domain; AT hook protein; bromodomain protein; similar to Sp SPAC1250.01 (paralog)
TI4896S002746	50/E03	0.41	SPBPB2B2.18		very hypothetical protein
TI4896S000407	11/C02	0.41	SPCC4B3.17	cbp3	ubiquinol cytochrome c reductase assembly factor; chaperone
TI4896S002409	08/G05	0.41	SPBP8B7.22	erd2	ER lumen protein retaining receptor activity; involved in intracellular protein transport; involved in protein-ER retention; involved in ER to golgi transport
TI4896S003053	04/E12	0.41	SPAC4G8.02c		translocon (gamma subunit); involved in protein-ER targeting
TI4896S000515	02/H04	0.41	SPCC622.07		very hypothetical protein
TI4896S000043	03/H08	0.41	SPCC330.14c	rpl2402; rpl24-2	60S ribosomal protein L24; similar to Sc RPL24A and RPL24B and YLR009W
TI4896S003997	41/C03	0.41	SPAC31G5.03	rps1101; rps11-1	40S ribosomal protein S11
TI4896S004413	06/B09	0.41	SPAC19G12.04		ureidoglycolate hydrolase
TI4896S004968	43/C11	0.41	SPAC3G6.05		conserved hypothetical; Mvp17/PMP22 family; similar to Sp SPAC4G9.14
TI4896S001758	44/F08	0.41	SPBC1711.07		WD repeat protein; involved in ribosome biogenesis and assembly
TI4896S003158	45/F06	0.41	SPAC821.12	orb6	serine/threonine protein kinase; Ndr kinase family; involved in cell polarity (maintenance) (required); involved in cell cycle regulation; involved in osmotic stress; essential; possibly functions downstream of Shk1p; interacts physically with Skb1p; Skb1p affects the localization of Orb6p
TI4896S000210	47/B11	0.41	SPCC1672.06c	asp1	acid phosphatase; important for the function of the cortical actin cytoskeleton; deletion mutant results in altered morphology and growth properties at elevated temperatures; deletion mutant results in polarized growth defects; non-essential; synthetically lethal with mutations in Arp2/3 complex components
TI4896S001679	13/D11	0.41	SPBC1E8.05		Sp specific families; serine-rich protein; possibly Sp specific; GPI anchored protein (pers. comm. Birgit Eisenhaber); glycoprotein; no apparent Sc ortholog
TI4896S001531	03/A09	0.41	SPBC27.01c		putative RNA polymerase beta-subunit
TI4896S004994	19/H08	0.41	SPAC1039.06		metal activated pyridoxal enzyme; involved in amino acid metabolism
TI4896S001049	36/B08	0.41	SPBC582.08		alanine aminotransferase; non-essential
TI4896S000801	09/C05	0.41	SPCC1620.01c	lsm2	U6 snRNA-associated protein core protein; Sm domain; involved in mRNA splicing
TI4896S002399	07/F07	0.41	SPBP8B7.12c		sequence orphan; hypothetical protein
TI4896S003549	06/D06	0.41	SPAC9G1.01	SPAC3H1.14	hypothetical protein; involved in vacuolar import and degradation
TI4896S001834	46/B11	0.40	SPBC24C6.02		putative ATP dependent RNA helicase DEAD/DEAH box helicase; ATP-dependent; RNA helicase; helicase C-terminal domain; involved in 35S transcript processing; involved in ribosome biogenesis and assembly
TI4896S002498	10/D03	0.40	SPBC211.08c		ribonuclease PH-like; 3' exoribonuclease; RNase complex
TI4896S000965	46/B02	0.40	SPBC660.13c	rpa1; rad11; ssb1	replication factor-A protein 1; DNA replication factor A complex
TI4896S000194	45/D01	0.40	SPCP31B10.05		tyrosyl-DNA phosphodiesterase; involved in DNA repair
TI4896S001120	47/H02	0.40	SPBC839.06	cta3	Ca2(+)-ATPase; P-type ATPase
TI4896S002066	39/G11	0.40	SPBP4H10.13	rps2302; rps23-2	40S ribosomal protein S23
TI4896S001726	12/F01	0.40	SPBC18E5.03c		involved in chromosome segregation; involved in chromatin remodelling; predicted coiled-coil region; no apparent orthologs
TI4896S000578	11/H08	0.40	SPCC162.03		short chain dehydrogenase
TI4896S002479	01/F11	0.40	SPBC21C3.19		hypothetical protein
TI4896S000078	25/B08	0.40	SPCC1529.01	SPCC794.14	MFS multidrug efflux transporter
TI4896S004916	37/C03	0.40	SPAC14C4.14	atp1	F1-ATPase (alpha subunit); ATP synthesis coupled proton transport
TI4896S000016	26/D05	0.40	SPCC757.12		glycosyl hydrolase family 13; alpha-amylase; GPI anchored protein(pers. comm. Birgit Eisenhaber); glycoprotein; no apparent Sc ortholog
TI4896S000371	42/C03	0.40	SPCC1795.07		mitochondrial ribosomal protein S13
TI4896S005040	51/C03	0.40	SPAC212.08c		Sp specific families; 66294 domain; possibly Sp specific; telomeric duplication
TI4896S001639	10/E08	0.40	SPBC3H7.11		methyltransferase; Sc ABP140 is actin-binding protein; similar to Sp SPBC21C3.07C
TI4896S002600	37/G07	0.40	SPBC1861.03		N-acetyltransferase complex; involved in protein amino acid acetylation; glucose repressible protein
TI4896S003575	10/B02	0.40	SPAC17H9.12c		NADH-cytochrome reductase
TI4896S003792	17/G08	0.40	SPAC23H3.09c		threonine aldolase activity; involved in glycine metabolism; involved in glycine biosynthesis; involved in threonine catabolism
TI4896S004444	35/H06	0.40	SPAC26H5.03		WD repeat protein; involved in chromatin assembly/disassembly
TI4896S000095	16/A08	0.40	SPCC553.10		Sp specific families; serine-rich protein; hypothetical protein; GPI anchored protein (pers. comm. Birgit Eisenhaber); glycoprotein; no apparent Sc ortholog
TI4896S000320	07/B08	0.40	SPCC63.13		conserved hypothetical; DnaJ domain protein
TI4896S001638	11/E09	0.40	SPBC3H7.12		sequence orphan; hypothetical protein
TI4896S003339	34/C06	0.40	SPAC9.03c	brr2	U5 snRNP-specific protein; DEAD/DEAH box helicase; RNA helicase; helicase C-terminal domain; AAA family ATPase; Sec63 domain; involved in mRNA splicing; complexed with Cdc5p
TI4896S002560	23/C05	0.40	SPBC215.03c	csn1	COP9/signalosome complex (subunit 1); required for the removal of Ned8p from Pcu1p; involved in DNA damage checkpoint; no apparent Sc ortholog
TI4896S001708	20/A11	0.40	SPBC29A3.03c		zinc finger protein; zf-C3HC4 type (RING finger); ubiquitin ligase (E3); LisH domain-suggested to function in microtubule dynamics; CLTH domain (inferred from context); involved in catabolite degradation; involved in vacuolar import and degradation
TI4896S002028	40/C12	0.40	SPBC32F12.06	pch1	cyclin homolog; complexed with Cdk9p; not reciprocal best hit; functional homolog of Sc YLR226W
TI4896S001453	32/C06	0.40	SPBC8D2.16c		conserved hypothetical protein
TI4896S002313	04/F06	0.40	SPBC2G2.04c	mmf1; pmf1	eukaryotic conserved protein; endoribonuclease L-PSP; YjgF family; involved in mitochondrial protein synthesis; involved in mitochondrial DNA maintenance; involved in heat shock response; heat-induced protein; links isoleucine biosynthesis and intact mitochondria maintenance; functionally complements Sc YIL051C; similar to Sp mmf2 (paralog)
TI4896S002822	42/A06	0.39	SPAC13G6.04	tim8	mitochondrial carrier; involved in import of zinc finger protein
TI4896S002131	02/G07	0.39	SPBC15D4.12c		hypothetical protein; sequence orphan
TI4896S000737	23/F04	0.39	SPCC18.17c		hypothetical protein; sequence orphan
TI4896S004066	25/B03	0.39	SPAC688.14		transcriptional regulator; SET domain; histone lysine methyltransferase
TI4896S003394	01/D06	0.39	SPAC23H4.05c		very hypothetical protein
TI4896S004287	26/E07	0.39	SPAC15A10.06		CPA1 sodium ion/proton antiporter
TI4896S002975	18/H07	0.39	SPAC2F7.13c		tryptophan-tRNA ligase; involved in tryptophanyl-tRNA aminoacylation; tryptophan-tRNA ligase activity
TI4896S002777	41/E11	0.39	SPAC977.15		dienelactone hydrolase family; similar to Sp SPBC30D10.14 (paralog)
TI4896S001133	21/B06	0.39	SPBC115.02c		ATPase (AFG1 family)
TI4896S002624	26/A04	0.39	SPBC3F6.06c	SPBC342.01c	glycosyl transferase family ALG8
TI4896S004033	14/D04	0.39	SPAC24C9.14		OTU-like cysteine protease
TI4896S001140	27/H06	0.39	SPBC947.10		zf-C3HC4 type (RING finger); ubiquitin ligase (E3)
TI4896S004322	05/A02	0.39	SPAC1F12.02c	p23fy	conserved eukaryotic protein; translationally controlled tumour protein homolog; potential target of the antimalarial drug artemesinin; TCTP family protein; calcium binding protein; widely-expressed
TI4896S001895	46/G10	0.39	SPBC12C2.05c		DAG domain; diacylglycerol binding domain; src (SH3) homology domain; involved in actin cortical patch distribution; actin cortical patch component
TI4896S003379	42/B02	0.39	SPAC1705.02	SPAC1F2.02c	human 4F5S homologeukaryotic conserved protein
TI4896S004520	02/D04	0.39	SPAC25G10.06	rps2801; rps28-1	40S ribosomal protein S28
TI4896S003433	46/A08	0.39	SPAC824.01	SPAC343.19	phosphatidylinositol 4-kinase; human Wiskott-Aldridge syndrome protein interacting protein homolog; involved in the regulation of actin cytoskeletal organization
TI4896S002827	13/G11	0.39	SPAC13G6.09		similar to C. elegans R07E5.10 and human and R. norvegicus RP-8 proteins; programmed cell death protein 2 C-terminal domain; zinc finger protein; zf-MYND type (inferred from context); non-essential; no apparent Sc ortholog
TI4896S001084	20/B10	0.39	SPBC1685.07c		amino acid transporter
TI4896S000605	10/A01	0.39	SPCC663.05c		histone chaperone; replication-coupling assembly factor (RCAF) component; anti-silencing protein
TI4896S004176	41/B04	0.39	SPAC3H5.10	rpl3202; rpl32; rpl32-2	60S ribosomal protein L32
TI4896S000960	18/H09	0.38	SPBC660.08		hypothetical protein; sequence orphan; predicted coiled-coil region
TI4896S004979	12/B02	0.38	SPAC29B12.04		involved in pyridoxine metabolism
TI4896S000466	24/F10	0.38	SPCC1322.04		UTP-glucose-1-phosphate uridylyltransferase activity; involved in protein amino acid glycosylation; similar to Sp SPCC794.10
TI4896S001632	16/E06	0.38	SPBC28E12.04		sequence orphan; hypothetical protein
TI4896S001160	32/A09	0.38	SPBC119.05c	csh3	src (SH3) homology domain
TI4896S003277	28/C09	0.38	SPAC1565.05		hypothetical protein; sequence orphan; predicted coiled-coil region
TI4896S003466	09/A07	0.38	SPAC17A5.05c		hypothetical protein; sequence orphan
TI4896S004155	09/E05	0.38	SPAC8E11.10	sou1	sorbitol utilization protein; short chain dehydrogenase; no apparent Sc ortholog
TI4896S001086	31/C04	0.38	SPBC1685.09	rps29	40S ribosomal protein S29; non-essential
TI4896S004965	02/D11	0.38	SPAC3G6.02	dss1	exonuclease complex component; involved in mitochondrial biogenesis; human disease dss1 homolog
TI4896S002102	37/B06	0.38	SPBC2D10.04		hypothetical protein; similar to Sp SPBC839.02 (paralog)
TI4896S003184	47/F06	0.38	SPAC23C4.19	spt5	involved in transcriptional regulation; involved in chromatin remodeling; nonopeptide repeat TPAWNSGSK -necessary and sufficient for binding to the capping enzymes in vivo (in a 2-hybrid assay) and in vitro; involved in tranS. cerevisiaeription elongation (regulation); involved in RNA polymerase II processivity (regulation) (implicated); chromatin structural protein; essential
TI4896S000610	40/E12	0.38	SPCC663.10		eukaryotic conserved protein
TI4896S000955	16/H07	0.38	SPBC660.03c	SPBC1198.13c	transcription initiation factor TFIIF (beta subunit)
TI4896S000343	09/C01	0.38	SPCC24B10.06		Sp specific families; hypothetical protein; GPI anchored protein (pers. comm. Birgit Eisenhaber); glycoprotein; no apparent Sc ortholog; no apparent orthologs
TI4896S003943	31/C01	0.38	SPAC8F11.01c	rpl4102; rpl41-2; rpl41; SPAC3F10.18c	60S ribosomal protein L41; similar to Sp rpl4101
TI4896S004385	28/A12	0.38	SPAC2F3.13c		tRNA-ribosyltransferase; no apparent Sc ortholog
TI4896S001596	16/C05	0.38	SPBC11G11.03		60S acidic ribosomal protein
TI4896S004352	03/E03	0.38	SPAC1071.08	rpp203; rpp2-3; rla6; ysprla6	ubiquinol cytochrome c reductase complex subunit (cytochrome bc1 complex); respiratory complex III
TI4896S004583	42/G07	0.38	SPAC9E9.15		hypothetical protein; sequence orphan
TI4896S002542	07/D05	0.38	SPBC3B9.21		conserved hypothetical eukaryotic protein; no apparent Sc ortholog
TI4896S001324	18/A06	0.38	SPBC1709.16c		conserved protein; oxidoreductase; involved in aromatic compound metabolism; no apparent Sc ortholog
TI4896S000846	24/A08	0.38	SPCC1840.04		metacaspase-like protein; cysteine protease
TI4896S002334	49/B04	0.38	SPBP7E8.01	SPBPB7E8.01	hypothetical protein; sequence orphan
TI4896S000887	10/G11	0.38	SPCC70.08c		SAM dependent methyltransferase; rRNA methyltransferase; no apparent Sc ortholog; similar to M. musculus bc002286 (check)
TI4896S001811	13/G04	0.38	SPBC21H7.08	SPBC16H5.14c	short chain dehydrogenase
TI4896S003313	35/A05	0.38	SPAC20G8.03	itr2	MFS myo-inositol transporter; similar to Sp itr1
TI4896S000241	05/G05	0.38	SPCC5E4.08	SPCC16C4.19	RNA-binding protein; RNase MRP
TI4896S000608	40/B01	0.38	SPCC663.08c		short chain dehydrogenase; tandem duplication
TI4896S000592	45/B10	0.37	SPCC777.09c	arg1	acetylornithine aminotransferase; involved in ornithine biosynthesis; involved in arginine biosynthesis via ornithine; involved in glutamate catabolism; acetylornithine aminotransferase activity; functionally complements arg1-230
TI4896S004318	28/F04	0.37	SPAC1556.06	meu1	meiotic expression upregulated; leucine zipper; NLS; predicted coiled-coil protein; alternative splice form meu2
TI4896S004504	47/C04	0.37	SPAC2C4.07c		ribonuclease II (RNB) family; dis3-like; similar to Sp SPBC609.01; no apparent Sc ortholog
TI4896S001765	31/F03	0.37	SPBC1711.14	rec15	involved in meiotic recombination; no apparent orthologs; low complexity protein
TI4896S001926	26/B02	0.37	SPBC29A10.03c	SPBC365.19c	chromatin assembly factor subunit
TI4896S000193	15/H07	0.37	SPCP31B10.04		hypothetical protein; sequence orphan; confirmed intron
TI4896S004055	11/A09	0.37	SPAC688.02c		spindle pole body component; involved in chromosome segregation
TI4896S004263	05/B11	0.37	SPAC1142.05		copper ion transporter; similar to Sp ctr4 (paralog)
TI4896S004659	09/B07	0.37	SPAC144.02		zinc finger protein; zf-C2H2 type; no apparent orthologs
TI4896S001969	31/D08	0.37	SPBC3E7.02c	hsp16	heat shock protein 16; Hsp20 family; expression in response to nucleotide depletion is regulated via the spc1/MAPK pathway; similar to Sp SPCC338.06c
TI4896S004061	17/G11	0.37	SPAC688.09		mitochondrial carrier
TI4896S000052	12/H12	0.37	SPCC320.06		hypothetical protein; sequence orphan
TI4896S002785	05/F01	0.37	SPAC1F8.05	isp3; meu4	involved in sexual differentiation; meiotic expression upregulated; no apparent orthologs
TI4896S003392	08/G06	0.37	SPAC23H4.07c	srp102	GTP-binding protein; involved in intracellular protein transport; involved in protein-ER targeting; involved in SRP-dependent cotranslational membrane targeting
TI4896S004629	08/D04	0.37	SPAC12B10.02c		hypothetical protein; sequence orphan
TI4896S003260	05/D01	0.37	SPAC10F6.16		cAMP-regulated phosphoprotein/endosulfine conserved region; eukaryotic conserved protein
TI4896S000237	43/H02	0.37	SPCC5E4.05c		abhydrolase family; phosphoslipase
TI4896S004674	20/H02	0.37	SPAC144.17c		6-phosphofructo-2-kinase; fructose-2,6-bisphosphatase
TI4896S000309	06/D01	0.37	SPCC2H8.05c	SPCC63.01c	hypothetical coiled coil protein; hypothetical protein; sequence orphan; predicted coiled-coil region
TI4896S003272	51/A06	0.37	SPAPB17E12.01c	cox1101; cox11; SPAC1420.04c	involved in cytochrome c oxidase biogenesis
TI4896S004700	28/A03	0.37	SPAPYUG7.03c	mid2	pleckstrin homology domain; involved in cytokinesis; involved in septation; involved in cytokinesis, formation of actomyosin apparatus; involved in cell separation; GTP-binding protein (ISS)
TI4896S000512	03/E01	0.37	SPCC622.04		very hypothetical protein
TI4896S001775	38/A02	0.37	SPBC17G9.08c	csx2	ADP-ribosylation factor (ARF); GTPase activating protein; ArfGap domain; pleckstrin homology domain; similar to Sp SPAC26A3.10; no apparent Sc ortholog
TI4896S004740	48/B11	0.37	SPAC4F10.01	SPAC20G4.08	hypothetical protein; sequence orphan; hypothetical protein; sequence orphan; predicted coiled-coil
TI4896S002534	05/C12	0.37	SPBC26H8.11c		hypothetical protein; similar to Sp SPAPB2B4.06
TI4896S001771	46/C11	0.37	SPBC17G9.04c		similarity to nucleoporin (nuclear pore complex)
TI4896S002555	08/A01	0.37	SPBC3B9.17	isa2	iron-sulphur protein; HesB-like domain; involved in iron metabolism; involved in iron-sulfur cluster biosynthesis
TI4896S002904	05/G06	0.37	SPAC1751.02c		mitochondrial ribosomal protein S19
TI4896S000886	09/F11	0.37	SPCC70.07c	tmp1; tmp	thymidylate kinase; functionally complements Sc CDC8
TI4896S003061	38/F10	0.36	SPAC4G8.09		leucine-tRNA ligase; involved in leucyl-tRNA aminoacylation; leucine-tRNA ligase activity
TI4896S002389	09/H01	0.36	SPBP8B7.02		predicted coiled-coil region; sequence orphan
TI4896S004902	21/H08	0.36	SPAC19D5.07		4-aminobutyrate aminotransferase (GABA transaminase)
TI4896S003413	11/C11	0.36	SPAP27G11.15		Slx-like structure-specific endonuclease subunit; Holliday junction resolvase; endo/exonuclease amino terminal domain; involved in DNA repair involved in meiotic recombination; involved in the processing of stalled and collapsed replication forks
TI4896S002037	34/B12	0.36	SPBC19C7.02	ubr1; SPBC32F12.14	ubiquitin ligase (E3); N-end-recognizing protein; zinc finger protein; zf-C3HC4 type (RING finger); zf-UBR1 type; similar to Sp ubr11
TI4896S003591	18/H12	0.36	SPAC607.09c		battenin family protein; involved in cellular pH homeostasis; involved in vacuolar pH control; similar to human CLN3 (mutated in Batten's disease)
TI4896S003017	38/C06	0.36	SPAC1D4.12	rhp3; rad15	transcription initiation factor TFIIH subunit; involved in DNA repair (required); involved in nucleotide-excision repair; DEAD/DEAH box helicaseXP-D family; functionally complements Sc RAD3; functionally complemented by Sc RAD3
TI4896S003224	35/B10	0.36	SPAC22A12.01c	SPAC56F8.17c	damaged DNA binding activity; involved in DNA repair and double-strand break repair
TI4896S000554	02/B12	0.36	SPCC584.12		sequence orphan; has transcript profile on microarray
TI4896S002885	04/F10	0.36	SPAC12G12.05c		transcription initiation factor TFIID subunit; TAF(II) complex (TBP-associated protein complex); SAGA complex; involved in establishment and/or maintenance of chromatin architecture
TI4896S004083	09/G05	0.36	SPAC1486.01	sod2	manganese superoxide dismutase (AF069292)
TI4896S001735	21/H10	0.36	SPBC18E5.10		putative respiratory chain NADH dehydrogenase complex subunit F; no apparent Sc ortholog
TI4896S004311	39/D10	0.36	SPAP4C9.01c	rad50; SPAC1556.01c	putative DNA repair protein, Rad50 homolog involved in DNA repair; SMC-like protein; involved in meiotic recombination; nvolved in DNA repair of lesion at the mating-type locus; nvolved in processing of DNA breaks; interacts with the cohesin complex during S phase to assist repair; stimulates sister chromatid recombination; links cohesion with repair; functions in the same pathway for the repair …
TI4896S002352	01/G04	0.36	SPBC1105.16c		RNase P subunit; possibly involved in tRNA processing
TI4896S003507	41/H07	0.36	SPAP11E10.01		ornithine cyclodeaminase; Mu-crystallin-like; no apparent Sc ortholog
TI4896S004097	20/B12	0.36	SPAC6G10.06		amino acid oxidase; similar to Sp SPAC1F5.03C
TI4896S001940	17/F11	0.36	SPBC2G5.01		conserved hypothetical; hypothetical protein
TI4896S001893	12/C04	0.36	SPBC12C2.07c		spermidine synthase
TI4896S000851	10/G04	0.36	SPCC1840.09		hypothetical protein
TI4896S002957	22/B09	0.36	SPAC227.11c		membrane-associated glycoprotein; involved in intracellular protein transport; involved in ER to golgi transport; involved in the transport of GPI-anchored proteins to the Golgi apparatus
TI4896S001024	02/F09	0.36	SPBC106.02c		ParBc-like nuclease domain
TI4896S000164	44/D07	0.36	SPCC4G3.07c		zinc finger protein; transcriptional regulator; zf-PHD finger; similar to human retinoblastoma binding protein 2; similar toSp SPAC30D11.08c (paralog); no apparentSc ortholog; involved in transcriptional regulation
TI4896S001016	04/G01	0.35	SPBC1271.07c		acetyltransferase; GNAT family; non-essential; no apparent Sc ortholog; non-essential
TI4896S002942	06/A11	0.35	SPAC24H6.02c		zinc finger protein; zf-DNL
TI4896S000941	23/D01	0.35	SPBC1683.12		membrane transporter; unknown specificity; similar to Sp SPAC11D3.18C and SPAC1039.04 and SPAC1002.16C
TI4896S003491	35/H11	0.35	SPAC1002.11		GPI-anchor transamidase complex; involved in GPI anchor biosynthesis; involved in attachment of GPI anchor to protein
TI4896S000661	11/B05	0.35	SPCC1442.07c		Zn-protease
TI4896S002869	14/C02	0.35	SPAC18B11.06		U3 snoRNP component; involved in rRNA processing
TI4896S001998	21/A09	0.35	SPBC18A7.01	SPBC4F6.19c	aminopeptidase; dipeptidase; metallopeptidase; peptidase family M24; no apparent Sc ortholog
TI4896S000644	03/D01	0.35	SPCC1450.05c	rox3	RNA polymerase II holoenzyme and mediator subcomplex subunit
TI4896S000048	26/G04	0.35	SPCC320.10	srp72	TPR repeat protein; protein signal sequence binding activity; involved in intracellular protein transport; involved in protein-ER targeting; involved in SRP-dependent cotranslational membrane targeting
TI4896S004283	20/H11	0.35	SPAC15A10.02		putative transcription initiation factor TFIID subunit; putative SAGA complex, possibly involved in chromatin architecture
TI4896S004165	16/C10	0.35	SPAC959.04c		mannosyltransferase
TI4896S000635	01/H05	0.35	SPCC191.07	cyc1	cytochrome c
TI4896S001210	08/A03	0.35	SPBC36.08c		hypothetical protein
TI4896S001125	13/G09	0.35	SPBC839.11c	hut1	protein which maintains optimal environment for folding in secretory pathway proteins in the ER; uridine diphosphate-N-acetylglucosamine transporter; functional homolog of Sc HUT
TI4896S002631	43/F05	0.35	SPBC16G5.02c		ribokinase; pfkB family carbohydrate kinase; involved in ribose metabolism; ribokinase activity
TI4896S001512	28/C10	0.35	SPBC83.05		RNA-binding protein; rrm RNA recognition motif; involved in early maturation of pre-rRNA and mitochondrial maintenance
TI4896S003540	24/B09	0.35	SPAC3H1.05		CAAX prenyl protease; peptidase family M48
TI4896S004329	36/A11	0.35	SPAC1F12.09		hypothetical protein; Sc YDR434W is null lethal
TI4896S004579	14/G01	0.35	SPAC9E9.11	plr1; plr	oxidoreductase; aldo/keto reductase; pyridoxal reductase; involved in pyridoxine (vitamin B6 biosynthesis); similar to Sp SPCC1281.04
TI4896S002762	50/H01	0.35	SPBC1348.14c	SPAC1348.14c; SPAPB8B6.01c; SPAC1348.14; SPAP8B6.01c	hexose transporter; ght7?; similar to Sp GHT1 and GHT2 and GHT4 and GHT5 and GHT6 and SPCC548.06C and GHT3
TI4896S000412	23/A10	0.35	SPCC4B3.12		SET domain; histone lysine methyltransferase; chromatin associated; no apparent Sc ortholog
TI4896S004166	36/A05	0.35	SPAC959.05c		glycoprotein; thioredoxin related glycoprotein; thioredoxin domain; similar to Sp SPBC3D6.13C and SPCC1840.08C (paralogs)
TI4896S004288	06/B02	0.35	SPAC15A10.07		hypothetical protein; sequence orphan
TI4896S002735	41/C11	0.35	SPBPB2B2.07c		Sp specific families; DUF999; telomeric duplication; possibly Sp specific
TI4896S004798	45/D05	0.35	SPAC1B3.17		sequence orphan; hypothetical protein
TI4896S002807	08/E11	0.35	SPAC5H10.02c		hypothetical protein; DJ-1/Pfp1 family; similar to Sp SPCC757.03c
TI4896S004271	29/D10	0.35	SPAC8C9.06c		conserved hypothetical; hypothetical protein; PPR domains; no apparent Sc ortholog
TI4896S000358	09/C02	0.35	SPCC24B10.21	tpi1; tpi	triosephosphate isomerase
TI4896S003750	48/H08	0.35	SPAC6B12.02c		hypothetical protein; similar to N. crassa B8B20.20; no apparent Sc ortholog
TI4896S003077	46/E08	0.35	SPAC2G11.05c		hypothetical coiled-coil protein; BRO1-like domain; involved in signal transduction; similar to A. nidulans pala; MAP kinase pathway
TI4896S001795	47/E11	0.35	SPBC14C8.14c	pol5	DNA polymerase V
TI4896S002519	28/C11	0.35	SPBC1604.01	SPBC1677.01c	conserved protein; similar to SLR0865 Synechocystis sp. and other bacteria; no apparent Sc ortholog
TI4896S003953	19/D03	0.35	SPACUNK4.17		conserved hypothetical; dehydrogenase; conserved in bacteria; no apparent Sc ortholog; similar to Sp SPBC12C2.04 (paralog)
TI4896S003643	22/B07	0.34	SPAC13F5.02c	ptr6	transcription initiation factor TFIID subunit; involved in mRNA export (required)
TI4896S000442	48/B04	0.34	SPCC4E9.01c	rec11; SPCC550.16c	region specific activator of recombination; involved in meiotic recombination (required); involved in sister chromatid cohesion; cohesin complex (meiotic); chromosome arm cohesin complex (meiotic); low similarity to WD repeat protein (probably spurious); similar to Sp rec7 (paralog); no apparent Sc ortholog
TI4896S004872	03/C01	0.34	SPAC29A4.07	srb6	RNA polymerase II holoenzyme component; mediator complex subunit
TI4896S004482	35/H01	0.34	SPAC1F7.02c		DEAD/DEAH box helicase; ATP-dependent; RNA helicase
TI4896S000380	30/G10	0.34	SPCC895.05	for3	involved in cell polarity, actin cable formation, microtubule cytoskeleton organization and biogenesis; interacts physically with SPAC23C4.08; actin-binding protein; similar to Sp cdc12 and fus1
TI4896S003888	15/H08	0.34	SPAC6F6.02c	pof5	F-box protein; FTH domain
TI4896S002846	24/E12	0.34	SPAC806.04c		conserved protein; DUF89; similar to Sp SPCC1393.13 (paralog)
TI4896S004609	23/H03	0.34	SPAC27D7.08c		methyltransferase; no apparent Sc ortholog
TI4896S004470	27/H04	0.34	SPAC25B8.16		ribonuclease subunit; involved in tRNA maturation, rRNA processing
TI4896S003108	31/H09	0.34	SPAC22H12.04c	rps102; rps3a-2; rps1-2	40S ribosomal protein S3a.2/S1B
TI4896S004004	35/E09	0.34	SPAC31G5.10		Myb family; DNA-binding protein; enhanced transcript after nitrogen starvation; transcription factor for RNA polymerase II
TI4896S000219	08/D10	0.34	SPCC1183.03c		frataxin homolog; involved in ion homeostasis; involved in regulation of mitochondrial iron accumulation
TI4896S002543	06/D12	0.34	SPBC3B9.05		hypothetical zinc finger protein
TI4896S003646	17/A11	0.34	SPAC13F5.05		protein disulphide isomerase; thioredoxin
TI4896S003855	29/C10	0.34	SPAC4F8.11		conserved hypothetical; WD repeat protein; similar to human peroxisomal targeting signal receptor; no apparent Sc ortholog
TI4896S002704	09/C03	0.34	SPBC1539.10		involved in ribosome biogenesis
TI4896S000862	10/E10	0.34	SPCC965.09		hydrolase; nitrilase family
TI4896S003891	03/D08	0.34	SPAC6F6.05		oligosaccharyltransferase (epsilon subunit); defender against cell death homolog
TI4896S003620	50/D04	0.34	SPAC20H4.07	rhp57; SPAC145.01	AAA family ATPase; involved in DNA repair; involved in sporulation; HhH1 (SMART)
TI4896S003688	14/D12	0.34	SPAC4G9.13c	vps26; pep8	retromer complex; involved in intracellular protein transport; involved in retrograde vesicle formation from the late vacuole
TI4896S004104	43/B10	0.34	SPAC6G9.01c		conserved hypothetical; hypothetical protein; similar to A. thaliana T22P22_150, and L. major L4286.2; no apparent Sc ortholog
TI4896S000867	04/F08	0.34	SPCC965.14c		cytidine and deoxycytidylate deaminase; tRNA-specific adenosine deaminase; involved in tRNA processing; zinc-binding protein
TI4896S000103	29/A04	0.34	SPCC553.02		glutamine-dependent NAD(+) synthetase; conserved eukaryotic protein; involved in nicotinamide adenine dinucleotide biosynthesis
TI4896S000709	18/C07	0.33	SPCC737.06c		Aldo/keto reductase; no Sc ortholog
TI4896S002667	15/H01	0.33	SPBC16A3.02c		quinone oxidoreductase; zinc binding dehydrogenase
TI4896S000648	27/D10	0.33	SPCC1450.09c		lysophospholipase; similar to Sp SPAC1A6.03C and SPAC1A6.04C and SPAC1348.10C and SPAC1786.02 and SPAC977.09C
TI4896S000389	16/B08	0.33	SPCC825.05c		conserved hypothetical protein
TI4896S000957	03/E12	0.33	SPBC660.05		glycine rich protein; WW domain; paralog?
TI4896S000961	02/B08	0.33	SPBC660.09		hypothetical protein; sequence orphan; has transcript profile on microarray
TI4896S000479	47/H01	0.33	SPCC132.01c	SPCC1322.17c	conserved hypothetical; conserved eukaryotic protein
TI4896S003018	15/C10	0.33	SPAC1D4.13	ste1; byr1; ste3	serine/threonine protein kinase; MAP kinase kinase (MAPKK); involved in conjugation; involved in sporulation; pheromone signalling pathway
TI4896S000436	24/D05	0.33	SPCC550.10	meu8	betaine aldehyde dehydrogenase; involved in betaine biosynthesis from choline; involved in meiosis; betaine-aldehyde dehydrogenase activity; meiotic expression upregulated; no apparent Sc ortholog
TI4896S001000	45/H01	0.33	SPBC1773.12		transcriptional regulator; zinc finger protein; zf-fungal Zn(2)-Cys(6) binuclear cluster domain
TI4896S000144	39/B01	0.33	SPCC306.04c		SET domain protein; transcriptional silencing SET1 complex (TAP); SET domain; histone lysine methyltransferase (H3-K4); involved in transcriptional silencing; involved in regulation of chromatin remodeling; involved in telomere maintenance; involved in DNA repair; deletion mutant results in telomere lengthening; non-essential; RNA-binding protein; ATM kinase Rad3-dependent pathway; rrm RNA recogn…
TI4896S001983	40/A06	0.33	SPBC4F6.04	rpl2502; rpl23a-2; rpl25b	60S ribosomal protein (subunit L25); similar to Sp rpl2501
TI4896S002898	10/D04	0.33	SPAC630.10		hypothetical protein
TI4896S004348	42/B12	0.33	SPAC1071.04c		putative signal peptidase; signal peptidase complex
TI4896S004643	49/B01	0.33	SPAC12B10.16c		hypothetical protein; no apparent Sc ortholog; conserved in bacteria
TI4896S000937	35/A06	0.33	SPBC1683.08	ght4	hexose transporter; similar to Sp GHT1 and GHT2 and GHT3 and GHT5 and GHT6 and SPCC548.06C and SPBC1348.14C
TI4896S002342	43/A03	0.33	SPBC1105.06	pmc4	RNA polymerase II holoenzyme component; mediator complex subunit; essential; involved in regulating RNA polymerase II activity
TI4896S003301	12/C08	0.33	SPAC57A10.03	cyp1	experimentally characterised; cyclophilin; peptidyl-prolyl cis-trans isomerase; interacts with SNW/SKIP coregulator; interacts physically with Snw1p; overexpression suppresses
TI4896S003996	13/H09	0.33	SPAC31G5.02		involved in cell cycle control
TI4896S002106	09/G12	0.33	SPBC2D10.08c		mitochondrial ribosomal protein L4
TI4896S002924	09/A12	0.33	SPAC13C5.04		glutamine amidotransferase
TI4896S003274	18/H05	0.33	SPAC1565.02c		GTPase activator; RhoGAP domain; no apparent Sc ortholog; non-essential
TI4896S000190	11/G04	0.33	SPCP31B10.01	cwf23; SPCC10H11.02	DNAJ domain protein; complexed with Cdc5p
TI4896S002641	40/H04	0.33	SPBC16G5.12c	top3	DNA topoisomerase III; involved in nuclear division (required); involved in DNA replication; involved in chromosome segregation; possibly functions downstream of Rqh1p
TI4896S002166	25/C09	0.33	SPBC1778.04	spo6	involved in meiosis II (required); involved in sporulation (required); similar to Sp dfp1; BRCT domain; Spo4p regulatory subunit; involved in ascospore formation (required); essential
TI4896S005023	17/G04	0.33	SPAC186.08c		L-lactate dehydrogenase; mitochondrial transit peptide 1-24aa; no apparent Sc ortholog
TI4896S003235	08/E12	0.33	SPAC22A12.12c		exosome (RNase complex); involved in rRNA processing
TI4896S002926	06/B12	0.33	SPAC13C5.06c		hypothetical protein; sequence orphan
TI4896S004293	02/C09	0.33	SPAC15A10.12c		hypothetical protein; no apparent Sc ortholog
TI4896S000806	18/H04	0.33	SPCC1620.06c		ribose-phosphate pyrophosphokinase
TI4896S002134	40/B11	0.33	SPBC15D4.15	pho2	p-nitrophenylphosphatase; involved in polyphosphate metabolism
TI4896S003513	49/G04	0.33	SPAPB1A10.06c		DEAD/DEAH box helicase; ATP-dependent; RNA helicase; ribonucleoprotein (RNP) complex; processome component; involved in rRNA processing
TI4896S002660	40/D12	0.33	SPBC16A3.09c	ufd1	ubiquitin fusion degradation protein (putative); Cdc48-Ufd1-Npl4 complex component (putative); involved in proteasomal processing; involved in the recognition of polyubiquitin-tagged proteins
TI4896S001397	25/G11	0.33	SPBC3D6.10		DNA-(apurinic or apyrimidinic site) lyase activity
TI4896S003152	20/D09	0.33	SPAC821.06	spn2	septin; involved in cytokinesis; GTP-binding protein
TI4896S000799	16/F08	0.32	SPCC126.14	prp18	involved in mRNA splicing (2nd step)
TI4896S001650	33/A12	0.32	SPBC3H7.01	stl1; spo14; SPBP16F5.01c	WD repeat protein; 1 predicted transmembrane helix; required for the formation of transport vesicles from the ER; This function involves the cytoplasmic domain of the protein, which is thought to interact with the small GTP-binding protein sar1; involved in sporulation (required); involved in spore wall assembly (required); essential
TI4896S004475	31/G06	0.32	SPAC683.02c	SPAC694.01c	zinc finger protein; zf-CCHC type (zinc knuckle)
TI4896S004415	31/D04	0.32	SPAC19G12.06c	hta2	histone h2a-beta; similar to Sp hta1
TI4896S004231	43/G04	0.32	SPAC17A2.03c	vma6	vacuolar ATP synthase; V-type ATPase (D subunit); vacuolar proton pump component; V0 sector
TI4896S004588	09/H07	0.32	SPAC17C9.13c	cut8	essential; involved in anaphase (required); possibly regulates APC
TI4896S001756	21/A08	0.32	SPBC1711.05		chaperone; LisH domain; central repeat region consensus DSESESSSEDSDSSSSSS ~7 copies?
TI4896S000028	09/E01	0.32	SPCC613.11c	meu23	Sp specific families; B13958 domain; meiotic expression upregulated; repeat containing; predicted coiled-coil
TI4896S001391	37/D06	0.32	SPBC3D6.04c		predicted coiled-coil protein; involved in spindle assembly checkpoint
TI4896S000134	43/G12	0.32	SPCC1682.09c		mitochondrial carrier; involved in mitochondrial transport; unknown specificity
TI4896S004404	34/C08	0.32	SPAC27E2.09	mak2	histidine kinase; involved in signal transduction; His-to-Asp phosphorelay; non-essential; functions upstream of Spy1p; function overlapping with Mak1p and Mak3p; implicated in mitotic cell cycle control; implicated in oxidative stress response; required for the regulation of sexual development; PAC domain protein; similar to Sp mak1 and mak3; response regulator receiver domain
TI4896S000058	19/B12	0.32	SPCC1235.03		smr domain protein (small mutS related protein); DNA repair related; CUE domain protein (inferred from context)
TI4896S001747	07/D02	0.32	SPBC23G7.11		DNA-3-methyladenine glycosidase; AlkA family; involved in nucleotide; excision repair; involved in DNA repair; similar to Sp mag1; no apparent Sc ortholog
TI4896S004677	31/A02	0.32	SPAC1834.02	aro1	pentafunctional aromatic polypeptide; involved in aromatic amino acid biosynthesis; 3-dehydroquinate synthase; 3-phosphoshikimate 1-carboxyvinyltransferase; shikimate kinase
TI4896S004705	06/D03	0.32	SPAC1782.02c		involved in mitochondrial DNA maintenance
TI4896S003361	46/A06	0.32	SPAC57A7.13		RNA-binding protein; rrm RNA recognition motif (2); G-patch domain; zinc finger protein; zf-C2H2 type; similar to human tumor suppressor luca15; no apparent Sc ortholog
TI4896S003767	38/C02	0.32	SPAC32A11.01		hypothetical protein; sequence orphan
TI4896S001232	47/F08	0.32	SPBC216.06c	swi1	involved in mating-type determination; involved in imprinting at the mating type locus (sensu Fungi); interacts with topoisomerase; TPR domains (inferred from context); involved in DNA replication (inhibition)
TI4896S003561	44/G09	0.32	SPAC9G1.13c		Myb family; DNA binding protein
TI4896S004742	16/F04	0.32	SPAC4F10.03c		tRNA methyltransferase; 2'-O-ribose tRNA anticodon loop methyltransferase
TI4896S000104	25/C07	0.32	SPCC553.01c	SPCC736.01c	conserved hypothetical; hypothetical protein; possibly involved in signal transduction, as the only detectable defect of the null mutant of the S. cerevisiae homolog YGR042w is in heterologous signal transduction
TI4896S003262	04/F02	0.32	SPAC56E4.02c		conserved protein; glycosyl transferase family 28
TI4896S004002	31/H07	0.31	SPAC31G5.08	ups1; ups1	uroporphyrinogen-III synthase
TI4896S000739	16/G10	0.31	SPCC290.02	rpc34	DNA-directed RNA polymerase III (subunit)
TI4896S000040	30/E11	0.31	SPCC330.11		BTB domain; ankyrin repeat protein; regulator of condensation
TI4896S002956	05/A09	0.31	SPAC227.10		prefoldin (subunit 2)
TI4896S003254	35/B09	0.31	SPAC10F6.10		protein kinase (RIO family); RIO1 domain; similar to A. nidulans; SUDD suppressor of bimD6; chromosome-spindle attachment defect
TI4896S000789	17/D04	0.31	SPCC126.04c		conserved hypothetical; hypothetical protein; similar to G-box-binding factor
TI4896S002617	26/D06	0.31	SPBC14F5.11c		PX domain; phosphoinositide binding; involved in intracellular protein transport
TI4896S000189	29/H07	0.31	SPCC10H11.01	prp11	DEAD/DEAH box helicase; RNA helicase; involved in mRNA splicing (IGI)
TI4896S003045	48/D12	0.31	SPAC22G7.04	ubp13	WD repeat protein (SMART); ubiquitin C-terminal hydrolase activity; involved in polyadenylation; exonuclease domain
TI4896S000555	26/B04	0.31	SPCC584.13		amino acid permease family; similar to Sp SPBC15C4.04C and SPAPB24D3.02C and SPCC74.04 and SPAC1039.01 and SPAC11D3.08C and SPAC9.10 and SPCC794.03
TI4896S004099	20/A10	0.31	SPAC6G10.08	idp1	isocitrate dehydrogenase (NADP+); involved in isocitrate metabolism; involved in glutamate metabolism; isocitrate dehydrogenase (NADP+) activity; involved in tricarboxylic acid cycle
TI4896S004960	25/F03	0.31	SPAC4D7.10c		sequence orphan; hypothetical protein
TI4896S003176	01/C05	0.31	SPAC23C4.11	atp18	F-type ATPase subunit j
TI4896S002291	21/A05	0.31	SPBC3B8.03		saccharopine dehydrogenase [NADP+, l-glutamate forming]; involved in lysine biosynthesis (7th step)
TI4896S003155	29/H08	0.31	SPAC821.09	eng1	glycosyl hydrolase family 81; endo-1,3-beta-glucanase; involved in septation; involved in cytokinesis; involved in cell separation; non-essential; GPI anchored protein; glycoprotein; regulated by Ace2p; similar to Sp eng2
TI4896S001235	24/E01	0.31	SPBC646.03		glutamyl-tRNA amidotransferase complex
TI4896S000861	17/G03	0.31	SPCC965.08c		alanine racemase; no apparent Sc ortholog
TI4896S003415	05/F03	0.31	SPAC343.02		mitochondrial ribosomal protein S19
TI4896S002109	18/A02	0.31	SPBC2D10.11c		involved in nucleosome assembly; similar to Sp SPCC364.06 (paralog)
TI4896S002325	22/C11	0.31	SPBC2G2.16		mannose-6-phosphate isomerase
TI4896S004640	41/F08	0.31	SPAC12B10.13		conserved hypothetical; conserved protein; CTLH domain; similar to human BA305P22.1; similar to A. thaliana F11P17.12 and T30A10.60; similar to D. melanogaster CG6617 and CG18467; no apparent Sc ortholog
TI4896S003188	51/G05	0.31	SPAC1A6.11		very hypothetical protein
TI4896S004257	47/A07	0.31	SPAC17G6.16c		involved in polyadenylation
TI4896S000991	44/D03	0.31	SPBC1773.03c		aminotransferase; no apparent Sc ortholog
TI4896S001663	31/C06	0.31	SPBC16E9.06c	uvi31	BolA-like protein; UV-induced protein; deletion mutant results in cell division defects; involved in cell division control and cell cycle arrest recovery
TI4896S004439	06/E06	0.31	SPAC23A1.16c		conserved eukaryotic protein; DUF408; Sc YER139C is required for growth at high temperatures
TI4896S003410	47/A11	0.31	SPAP27G11.12		conserved hypothetical; eukaryotic conserved protein; no apparent Sc ortholog
TI4896S001416	32/A01	0.31	SPBC27B12.09c		transporter; flavin adenine dinucleotide transporter
TI4896S000646	16/A01	0.31	SPCC1450.07c		putative D-amino acid oxidase; no apparent Sc ortholog
TI4896S002189	31/C11	0.31	SPBC405.07	rpl3602; rpl36; rpl36-2	60S ribosomal protein L36; similar to Sp rpl3601
TI4896S001964	47/B06	0.31	SPBC6B1.07	zer1; prp1	TPR repeat protein; involved in mRNA splicing (IGI); involved in G0 transition; involved in cell cycle progression (implicated); involved in poly(A)+ RNA nuclear export (implicated); does not functionally complement Sc PRP6
TI4896S000690	19/F12	0.31	SPCC1223.04c		SET domain; histone lysine methyltransferase
TI4896S004031	21/G01	0.31	SPAC24C9.12c		serine hydroxymethyltransferase; involved in glycine metabolism; involved in serine metabolism; glycine hydroxymethyltransferase activity
TI4896S001106	38/D05	0.30	SPBC354.09c		protease peptidase family M28; similar transferrin receptor protein; PA (protease associated) domain; non-essential
TI4896S001957	44/G08	0.30	SPBC25B2.11	pof2	F-box protein; leucine-rich repeat protein
TI4896S004587	11/A05	0.30	SPAC17C9.14		involved in peroxisome biogenesis; farnesylated protein
TI4896S003790	03/B08	0.30	SPAC23H3.07c		mitochondrial ribosomal protein S14
TI4896S004560	02/C02	0.30	SPAC30.11	SPAC29E6.07	very hypothetical protein
TI4896S001220	49/B10	0.30	SPBC713.07c		vacuolar polyphosphatase
TI4896S003317	34/D12	0.30	SPAC20G8.07c		C-8 sterol isomerase
TI4896S004276	01/G02	0.30	SPAC8C9.11		hypothetical protein; BolA/YRBA family protein
TI4896S000731	03/C06	0.30	SPCC18.11c		SET1 complex; non-essential; Dpy-30 domain protein; involved in transcriptional silencing; involved in regulation of chromatin remodelling
TI4896S003014	11/H02	0.30	SPAC1D4.09c		conserved hypothetical protein; no apparent Sc ortholog
TI4896S002556	03/D07	0.30	SPBC3B9.18c	vma7	putative vacuolar ATP synthase subunit F; vacuolar ATP synthase (subunit F); vacuolar proton pump component; V1 sector
TI4896S003318	47/F12	0.30	SPAC20G8.08c		SNF2 family; helicase C-terminal domain; DEAD/DEAH box helicase; similar to Sp SPCC1235.05C and SPAC25A8.01C
TI4896S003619	49/A06	0.30	SPAC20H4.06c		hypothetical protein; G-patch domain; RNA-binding protein
TI4896S000492	12/F06	0.30	SPCC338.11c	uvi22; rrg1	experimentally characterised; UV-induced protein; transcriptionally regulated by glucose; regulated post transcriptionally by control of mRNA stability; deletion mutant results in reduced size; non-essential; overexpression results in elongated cells of G2 delay; involved in G2/M phase progression; regulated by the SAPK pathway
TI4896S003030	47/G07	0.30	SPAC22F3.03c		DEAD/DEAH box helicase; SNF2 family; helicase C-terminal domain; involved in DNA repair
TI4896S000858	14/A10	0.30	SPCC965.05c	thp1	uracil DNA N-glycosylase activity; involved in DNA repair; involved in base-excision repair; no apparent Sc ortholog
TI4896S002357	28/C04	0.30	SPBC887.03c		basic helix-loop-helix (bHLH); involved in DNA replication; NucleOlar Complex 2; involved in nuclear export of pre-ribosomes; interacts with MCM proteins; involved in the establishment and maintenance of pre-replication complexes; conserved eukaryotic protein
TI4896S001963	38/D06	0.30	SPBC6B1.06c	ubp14	ubiquitin C-terminal hydrolase activity; UBA domain; ubiquitin-binding protein (implicated); involved in protein deubiquitination; zinc finger protein; zf-UBP type
TI4896S003144	27/C06	0.30	SPAC222.13c		6-phosphofructo-2-kinase activity; involved in fructose 2,6-bisphosphate metabolism
TI4896S004363	17/C12	0.30	SPAC926.08c		RNA-binding protein; Brix domain; involved in RNA processing; involved in ribosome biogenesis and assembly; eukaryotic conserved protein
TI4896S003116	03/B03	0.30	SPAC1687.06c	rpl28; rpl44	60S ribosomal protein L28/L44; no apparent Sc ortholog
TI4896S001770	36/C05	0.30	SPBC17G9.03c		lysine-tRNA ligase; involved in lysyl-tRNA aminoacylation; lysine-tRNA ligase activity
TI4896S003557	23/F12	0.30	SPAC9G1.09	sid1	PAK-related kinase; GCK subfamily; serine/threonine protein kinase; no apparent S. cerevisiae ortholog; essential; involved in the regulation of septation; interacts physically with Cdc14p; Has a role in the septation initiation network (SIN) required for cytokinesis
TI4896S002341	19/E04	0.30	SPBC1105.05	exg1	glucan 1,3-beta-glucosidase I/II precursor; exo-beta-1,3-glucanase (putative)
TI4896S003257	19/E10	0.30	SPAC10F6.13c		aspartate aminotransferase
TI4896S002943	51/E04	0.30	SPAC24H6.01c	SPAC23E2.04c; SPAPB21F2.01	hypothetical protein
TI4896S000370	47/H07	0.30	SPCC1795.08c		Myb family; DNA binding protein; SANT subfamily; involved in chromatin remodeling
TI4896S004355	08/H01	0.29	SPAC1071.11		NADH dependent oxidoreductase; no apparent Sc ortholog
TI4896S003504	49/B11	0.29	SPAC1399.03	fur4	uracil permease; similar to Sp SPAC29B12.14C
TI4896S000416	07/F01	0.29	SPCC4B3.08		hypothetical protein; sequence orphan
TI4896S002550	42/D05	0.29	SPBC3B9.12		TRAPP; sybindin-like famil; YDR246Winvolved in intracellular protein transport; similar to S. cerevisiae
TI4896S001089	02/C11	0.29	SPBC1685.12c		very hypothetical protein
TI4896S005002	24/E10	0.29	SPAC922.05c		similar to A. thaliana T10F20.2; no apparent Sc ortholog
TI4896S000693	45/H07	0.29	SPCC1223.07c		aspartate-tRNA ligase; involved in aspartyl-tRNA aminoacylation; aspartate-tRNA ligase activity
TI4896S001330	31/G07	0.29	SPBC409.05	psh1; skp1; sph1	SCF ubiquitin ligase complex; complexes with Pop1p and Pop2p; essential; involved in cytokinesis and cell separation; skp1 family
TI4896S002645	29/F07	0.29	SPBC16G5.16		transcriptional regulator; zinc finger protein; zf-fungal Zn(2)-Cys(6) binuclear cluster domain
TI4896S000304	01/G11	0.29	SPCC1393.12		hypothetical protein; sequence orphan
TI4896S000106	22/D04	0.29	SPCC736.03c		phenylalanyl-tRNA synthetase; involved in phenylalanyl-tRNA aminoacylation; phenylalanine-tRNA ligase activity
TI4896S001052	38/H03	0.29	SPBC582.11c	nup107; SPBC428.01c	nucleoporin; nuclear pore complex (putative); essential
TI4896S000306	36/A09	0.29	SPCC2H8.02		MFS inorganic phosphate transporter
TI4896S003581	23/G01	0.29	SPAC17H9.19c	cdt2	WD repeat protein; regulated by DSC1/MBF complex; involved in vegetative growth; involved in sporulation; non-essential; involved in DNA replication; functionally complemented by overexpression of suc22; deletion sensitive to HU; no apparent Sc ortholog
TI4896S000403	43/D10	0.29	SPCC1259.15c	ubc11; ubcp4; ubcdp	ubiquitin conjugating enzyme; E2-C; involved in mitotic transition (required); involved in the protein ubiquitination of Cdc13p; involved in the initiation of ubiquitination
TI4896S000688	15/G09	0.29	SPCC1223.02	nmt1; thi3	experimentally characterised; involved in the regulation of thiamine biosynthesis; repressed by thiamine; involved in hydroxymethylpyrimidine synthesis; involved in thiamine synthesis; deletion mutant results in thiamine auxotrophy; no message in thiamine; co-ordinately regulated with nmt1???
TI4896S002518	27/H02	0.29	SPBC1604.02c		conserved hypothetical; PPR domains
TI4896S003058	20/A08	0.29	SPAC4G8.06c		fungal conserved protein
TI4896S001305	14/C07	0.29	SPBC1734.13	atp3	mitochondrial F1-ATPase (gamma subunit); ATP synthesis coupled proton transport
TI4896S003868	20/H07	0.29	SPAC644.07		AAA family ATPase; involved in the expression of functional Rieske iron-sulfur protein; involved in iron metabolism; chaperone; involved in mitochondrial respiratory chain complex III assembly; human disease GRACILE syndrome ortholog
TI4896S002125	42/C07	0.29	SPBC15D4.06		N-acetyltransferase
TI4896S000672	36/F06	0.29	SPCC285.03		DEAD/DEAH box helicase; ATP-dependent; RNA helicase
TI4896S000681	03/A03	0.29	SPCC285.12	lsm7	U6 snRNA-associated protein; involved in mRNA splicing; Sm domain
TI4896S000064	46/A09	0.29	SPCC1235.09		WD repeat protein; LisH domain
TI4896S003399	16/E02	0.29	SPAP27G11.02		conserved hypothetical; TPR repeat protein
TI4896S001498	50/F05	0.29	SPBC11B10.03	pi008; SPACTOKYO_453.28c	Golgi transport complex subunit; conserved eukaryotic protein
TI4896S000993	40/C09	0.29	SPBC1773.05c	tms1	dehydrogenase; sorbitol dehydrogenase; suppresses growth arrest induced by a p53 tumour mutant; monoclonal antibodies
TI4896S001719	41/A09	0.28	SPBC29A3.14c	trt1	telomerase catalytic subunit; reverse transcriptase 1
TI4896S004876	03/A08	0.28	SPAC29A4.03c		mitochondrial ribosomal protein S9
TI4896S002110	40/D09	0.28	SPBC2D10.12	rhp23	involved in DNA repair; involved in nucleotide-excision repair; similar to human HHR23A; ubiquitin family protein; UBA domain; involved in cell cycle control; involved in protein ubiquitination; involved in protein deubiquitination; ubiquitin-binding protein
TI4896S000843	06/B04	0.28	SPCC1840.01c	mog1; SPCC790.04c	Ran-GTPase; GTP-binding protein; possibly facilitates the generation of Ran-GTP from Ran-GDP in the nucleus; involved in mitosis to interphase transition (required); required for poly(A)(+) RNA metabolism; functionally complemented by Sc MOG1; involved in nuclear protein import; interacts physically with Spi1p
TI4896S004256	20/E07	0.28	SPAC17G6.15c		MTC tricarboxylate transporter
TI4896S003438	05/C01	0.28	SPAC824.06		DNAJ domain protein
TI4896S004745	18/D11	0.28	SPAC4F10.06		conserved hypothetical protein
TI4896S003824	09/D04	0.28	SPAC823.04		conserved hypothetical protein
TI4896S004000	03/G03	0.28	SPAC31G5.06		hypothetical protein; sequence orphan
TI4896S000182	12/E12	0.28	SPCC970.06		cargo receptor for soluble proteins; surfeit locus SURF40 family; 7 predicted transmembrane helices
TI4896S000257	47/G04	0.28	SPCC16C4.14c	sfc4	RNA polymerase III transcription factor (TFIIIC subunit); Brf-associated binding subunit; predicted to bind SPBC13E7.10c (brf); TPR repeat protein
TI4896S000998	35/E02	0.28	SPBC1773.10c		asparagine-tRNA ligase; involved in asparaginyl-tRNA aminoacylation; asparagine-tRNA ligase activity
TI4896S004687	32/H11	0.28	SPAC17D4.01	pex7; SPAC1834.12	peroxisomal targeting signal receptor; WD repeat protein
TI4896S002276	01/A02	0.28	SPBC11C11.12		possible pseudogene; similar to part of protein in cob intron
TI4896S001551	01/B12	0.28	SPBC21B10.11		dolichol phosphate mannose regulatory protein (Dpm2-like); 1TM
TI4896S003683	48/D03	0.28	SPAC4G9.08c	rpc2	DNA-directed RNA polymerase III complex (130 kD subunit)
TI4896S003381	42/E02	0.28	SPAC23H4.18c	pip1	pop-interacting protein 1; SCF ubiquitin ligase complex; zinc finger protein; zf-C3HC4 type (RING finger); ubiquitin ligase (E3)
TI4896S001134	09/D08	0.28	SPBC115.01c		exosome (RNase complex); involved in rRNA processing
TI4896S000046	07/A12	0.28	SPCC320.12	SPCC330.17c	neutral zinc metallopeptidase
TI4896S000586	44/A03	0.28	SPCC777.03c		NifS homolog, putative aminotransferasenifs homolog; aminotransferase; similar to Sp SPAC11D3.10
TI4896S004953	27/H09	0.28	SPAC4D7.03	sud1; pop2	F-box protein; WD repeat protein; ubiquitin ligase complex
TI4896S004204	17/A12	0.28	SPAC328.08c		tubulin specific chaperone; TBCC family; CARP domain
TI4896S003180	12/E06	0.28	SPAC23C4.15	rpb5	experimentally characterised; DNA-directed RNA polymerase (I, II, and III subunit); involved in transcription from Pol I promoter, Pol II promoter and Pol III promoter; DNA-directed RNA polymerase activity (function of complex); interacts physically with Rpb1p; interacts physically with Rpb2p; interacts physically with Rpb3p
TI4896S001564	16/A12	0.28	SPBC19C2.04c	ubp11	ubiquitin C-terminal hydrolase activity; no apparent Sc ortholog
TI4896S002549	18/E09	0.28	SPBC3B9.11c	ctf1	involved in transcription termination; involved in polyadenylation; rrm RNA recognition motif; RNA-binding protein
TI4896S004438	07/H05	0.27	SPAC23A1.15c		eukaryotic conserved protein; membrane glycoprotein; involved in intracellular protein transport and endocytosis
TI4896S002866	11/D11	0.27	SPAC18B11.09c		acetyltransferase
TI4896S003929	24/C01	0.27	SPAC3F10.04	gsa1; gsh2	glutathione synthetase; involved in glutamate metabolism; involved in glutathione biosynthesis; involved in cadmium resistance; involved in phytochelatin synthesis; functionally complemeted by A. thaliana gsh2; subunit data; expression regulated by the Atf1-Spc1-Wis1 signaling pathway
TI4896S004782	05/G07	0.27	SPAC1B3.02c		hypothetical protein
TI4896S001491	49/D01	0.27	SPBC32H8.10	pi014; SPACTOKYO_453.22	Cdc2 kinase homologue; cyclin-dependent protein kinase; P-TEFb factor; serine/threonine protein kinase; involved in transcription from RNA polymerase II; complexed with Pch1p; interacts physically with Pch1p (Cdk domain); interacts physically with Pct1p; interacts physically with Spt5p; phosphorylates Spt5p (CTD)interacts physically with Rpb1p; phosphorylates Rpb1p
TI4896S002629	17/E02	0.27	SPBC342.06c		involved in DNA repair
TI4896S001258	07/E11	0.27	SPBP35G2.09		U1 snRNP component; involved in mRNA splicing; involved in spliceosome assembly
TI4896S001008	46/D10	0.27	SPBC1271.15c		translation initiation factor if-2; non-essential
TI4896S001463	32/C07	0.27	SPBC17A3.06	pi040	protein tyrosine phosphatase; involved in meiosis, sporulation
TI4896S002451	03/C11	0.27	SPBC31F10.09c	nut2	RNA polymerase II holoenzyme component; mediator complex subunit; involved in regulating RNA polymerase II activity
TI4896S000982	24/G06	0.27	SPBC800.08		eukaryotic translation initiation factor 3 gamma subunit; involved in 1-methyladenosine modification and maturation of initiator methionyl-tRNA; RNA-binding protein
TI4896S000769	51/H01	0.27	SPCC576.19c		very hypothetical protein
TI4896S004388	44/G06	0.27	SPAC2F3.16		zinc-finger protein; with possiblzinc finger protein; zf-C2H2 type(; zf-C3HC4 type (RING finger); ubiquitin ligase (E3); zinc-binding protein; LIM domain signature; no apparent Sc ortholog
TI4896S003542	13/H04	0.27	SPAC3H1.07	aru1	arginase; arginine degradation pathway; similar to Sp car1
TI4896S000107	17/G02	0.27	SPCC736.04c	gma12	alpha-1,2-galactosyltransferase Gma12; non-essential; GMA12/MNN10 family; predicted N-terminal signal sequence; Involved in the O- and N-linked oligosaccharide modification of proteins transported through the Golgi stack; This occurs in cis Golgi where the enzyme transfers galactose from UDP- galactose to a variety of mannose based acceptors; Ptm O-glycosylated; Belongs to the glycosyltransferase…
TI4896S003565	30/A02	0.27	SPAC17H9.02		DEAD/DEAH box helicase; involved in mRNA export
TI4896S004505	08/G08	0.27	SPAC2C4.08		hypothetical protein
TI4896S001338	09/E04	0.27	SPBC409.13		6,7-dimethyl-8-ribityllumazine synthase; DMRL synthase family; involved in riboflavin biosynthesis
TI4896S003804	47/A10	0.27	SPAC25H1.07		conserved hypothetical; conserved protein
TI4896S000828	20/C01	0.27	SPCC1919.03c		5'-amp-activated protein kinase beta subunit; involved in the regulation of fatty acid synthesis by the phosphorylation of acetyl-CoA carboxylase; involved in the regulation of carbohydrate metabolism; N-myristoylated (ISS)
TI4896S000286	14/G07	0.27	SPCC1020.07		haloacid dehalogenase-like hydrolase; similar to Sp SPAC4C5.01 (paralog)
TI4896S001448	31/C10	0.27	SPBC8D2.11	pi054	hypothetical protein; sequence orphan
TI4896S000609	40/B02	0.27	SPCC663.09c		short chain dehydrogenase; tandem duplication
TI4896S003532	10/G01	0.27	SPAP14E8.03	bos1	SNARE; BOS1 family;1 predicted transmembrane helix; facilitates vesicular transport from the ER to the Golgi complex (By similarity); involved in secretory pathway
TI4896S000986	18/E07	0.27	SPBC800.11		inosine-uridine preferring nucleoside hydrolase; no apparent Sc ortholog
TI4896S004976	31/A05	0.27	SPAC29B12.01	SPAC3G6.12	SNF2 family; helicase C-terminal domain; DEAD/DEAH box helicase
TI4896S004332	19/F06	0.27	SPAC4H3.02c		sequence orphan; hypothetical protein
TI4896S002659	24/H02	0.27	SPBC16A3.10		membrane bound O-acyltransferase (MBOAT)
TI4896S002876	24/G11	0.27	SPAC12G12.14c		polyadenylation factor I subunit; essential (pers. comm. Chris Norbury); mRNA 3'-end processing; WD repeat protein; human ortholog fSAP57 has been isolated with functional spliceosomes; (old-> hypothetical Trp-Asp repeats containing protein)
TI4896S000340	06/B05	0.27	SPCC24B10.03		very hypothetical protein; sequence orphan; predicted coiled-coil region
TI4896S002084	40/C07	0.27	SPBC1703.10	ypt1	small GTPase; Ypt subfamily; Rab family; essential; GTP-binding protein; probably involved in vesicular traffic; involved in intracellular protein transport; functionally complements Sc YPT1
TI4896S000420	30/F02	0.27	SPCC4B3.04c		hypothetical protein; cyclic nucleic acid binding family protein; patatin-like phospholipase
TI4896S002535	17/H01	0.27	SPBC26H8.12		cytochrome c heme lyase
TI4896S000396	08/F05	0.27	SPCC1259.06		hypothetical protein; sequence orphan
TI4896S000892	18/G07	0.26	SPCC1827.02c		cholinephosphate cytidylyltransferase; involved in glycerophospholipid synthesis
TI4896S004140	08/D03	0.26	SPAC26A3.03c		hypothetical protein; Sc NCE4 (homolog) is a negative regulator of Cts1p expression
TI4896S003967	39/C02	0.26	SPAPYUK71.03c		putative C2 domain family protein C2 domain; similar to Sp SPCC962.01
TI4896S003495	22/G04	0.26	SPAC1002.14	itt1	zinc finger protein; zf-C3HC4 type (RING finger); ubiquitin ligase (E3); IBR domains; inhibitor of translation termination
TI4896S002269	48/A02	0.26	SPBC17D1.07c		hypothetical protein calcium binding protein; calponin homology (CH) domain; IQ domain
TI4896S004393	13/E07	0.26	SPAC11G7.05c		malonyl CoA-acyl carrier protein transacylase; reciprocal best hit
TI4896S004793	06/E09	0.26	SPAC1B3.12c	rpb10	DNA-directed RNA polymerase (I, II, and III subunit); involved in transcription from Pol I promoter; involved in transcription from Pol II promoter; involved in transcription from Pol III promoter; DNA-directed RNA polymerase activity (function of complex); localization DNA-directed RNA polymerase I complex; localization DNA-directed RNA polymerase II, core complex; abc10-beta; interacts physical…
TI4896S003056	46/H01	0.26	SPAC4G8.04		TBC domain protein; GTPase activating protein; Rab-like GTPase
TI4896S003501	23/A03	0.26	SPAC1002.19		GTP cyclohydrolase; involved in riboflavin biosynthesis; no apparent Sc ortholog
TI4896S001982	36/B01	0.26	SPBC4F6.03c	leu3; SPBC3E7.16c	2-isopropylmalate synthase
TI4896S001680	40/A07	0.26	SPBC1A4.01	apc10; SPBC1E8.06	anaphase-promoting complex (APC); regulators of the APC-cyclosome; involved in cyclin degradation (required); involved in metaphase-anaphase transition (required)
TI4896S001774	39/H04	0.26	SPBC17G9.07	rps2402; rps24a; rps24-2	40S ribosomal protein S24B
TI4896S004359	28/A02	0.26	SPAC926.04c	hsp90; swo1	chaperone; heat shock protein 90 homolog
TI4896S001532	16/B11	0.26	SPBC27.02c		DASH complex; microtubule-binding complex; involved in chromosome segregation; phosphoprotein; non-essential
TI4896S004887	02/B07	0.26	SPAC26F1.05		sequence orphan; has transcript profile on microarray
TI4896S004328	16/G06	0.26	SPAC1F12.08		cytidylyltransferase; Sc YGR277C is null-lethal
TI4896S004116	01/E06	0.26	SPAC6G9.13c		hypothetical protein; sequence orphan; has transcript profile on microarray
TI4896S004754	26/G03	0.26	SPAC4F10.15c	wsp1	Wiskott-Aldrich homolog; involved in stress response; involved in cytokinesis; involved in actin cytoskeletal organization; involved in control of the actin cytoskeleton; actin cortical patch component; involved in actin cortical patch assembly; involved in actin cortical patch distribution; promoter homolD box; involved in endocytosis
TI4896S001645	16/E12	0.26	SPBC3H7.05c		sequence orphan; hypothetical protein
TI4896S002250	40/A08	0.26	SPBC20F10.06	mad2	spindle assembly checkpoint component; horma domain
TI4896S000589	16/D09	0.26	SPCC777.06c		conserved hypothetical; hydrolase; no apparent Sc ortholog
TI4896S003574	03/E02	0.26	SPAC17H9.11		cofilin/tropomyosin-type actin binding protein; similar to Sc YDR063W
TI4896S004325	17/G12	0.26	SPAC1F12.05		conserved hypothetical; conserved fungal protein; similar to Sp SPBC18H10.20C (paralog)
TI4896S001603	33/A03	0.26	SPBC18H10.04c	sce3	RNA-binding protein; rrm RNA recognition motif; suppressor of cdc11 septation defect
TI4896S003796	23/F07	0.26	SPAC23H3.13c	gpa2; git8	guanine nucleotide-binding protein (alpha-2 subunit); involved in monitoring of nutrition, regulation of glucose repression, and sporulation
TI4896S002237	04/F05	0.26	SPBC25H2.09		hypothetical protein; sequence orphan
TI4896S004881	42/A05	0.26	SPAC26F1.11		very hypothetical protein
TI4896S000414	27/C04	0.26	SPCC4B3.10c	ipk1	inositol 1,3,4,5,6-pentakisphosphate (IP5) kinase
TI4896S002455	47/F10	0.26	SPBC31F10.13c		WD repeat protein; hira protein; histone transcription regulator; similar to Sp slm9
TI4896S001219	49/E03	0.26	SPBC713.06		DNA ligase; similar to Sp CDC17
TI4896S003487	14/F09	0.26	SPAC1002.07c	ats1	N-acetyltransferase; GNAT family; closest Sc homologs HPA2 and HPA3 are histone acetyltransferases but Sp sequence is more similar to bacterial acetyltransferases?; human homolog SAT is a Spermidine/spermine N1-acetyltransferase which catalyzes rate-limiting step in polyamine catabolism
TI4896S001924	40/G09	0.26	SPBC365.17	ccr1; SPBC29A10.01	NADPH-cytochrome p450 reductase; involved in ergosterol biosynthesis
TI4896S001053	18/A10	0.26	SPBC428.02c	eca39; SPBC582.12c	branched chain amino acid aminotransferase; phosphate dependent; involved in leucine biosynthesis; involved in valine biosynthesis; involved in isoleucine biosynthesis; non-essential
TI4896S000538	16/H10	0.26	SPCC11E10.06c		RNA polymerase II (elongator subunit)
TI4896S002039	02/F11	0.26	SPBC19C7.04c	SPBC19C7.04c	possibly fungal specific
TI4896S000753	14/A04	0.26	SPCC1739.04c		hypothetical protein; sequence orphan
TI4896S000833	02/C01	0.26	SPCC1919.08c		mitochondrial ribosomal protein L30
TI4896S001980	02/D05	0.26	SPBC4F6.01	smf1; SPBC3E7.14	small nuclear ribonucleoprotein with Sm domain; complexed with Cdc5p
TI4896S003023	28/B03	0.25	SPAC22F3.10c	gcs1	glutamate--cysteine ligase; involved in glutathione biosynthesis (1st step); involved in response to cadmium ion; glutamate-cysteine ligase activity
TI4896S002960	09/H04	0.25	SPAC227.14		fungal conserved protein
TI4896S004569	02/A08	0.25	SPAC9E9.01		very hypothetical protein; sequence orphan
TI4896S003857	04/A10	0.25	SPAC4F8.08		hypothetical protein; sequence orphan
TI4896S002970	45/H11	0.25	SPAC2F7.07c		zinc finger protein; zf-PHD finger; involved in transcriptional regulation
TI4896S004970	02/G04	0.25	SPAC3G6.07		very hypothetical protein
TI4896S000849	14/F08	0.25	SPCC1840.07c		metallophosphatase; no apparent Sc ortholog
TI4896S001801	44/F06	0.25	SPBC15C4.03		RAB geranylgeranyl-transferase escort protein; GDP dissociation inhibitor
TI4896S002249	47/G01	0.25	SPBC20F10.05		sequence orphan; hypothetical protein
TI4896S001962	38/A01	0.25	SPBC6B1.05c		involved in autophagy; involved in vacuole targeting; involved in peroxisome degradation
TI4896S003275	04/H02	0.25	SPAC1565.03		very hypothetical protein; sequence orphan; has transcript profile on microarray
[truncated: 2,756 more rows]
