# Supplementary material for: Microarray-based target identification using drug hypersensitive fission yeast expressing ORFeome
Source: Royal Society of Chemistry journal article supplement (doi:10.1039/c0mb00326c), 2011-02-22
Supplement: c0mb00326c_s3.csv [file c0mb00326c_s3.csv]

Sequence ID	Gene ID	Log2 (treatment/conteol)	Gene name1	Gene name2	Gene product
TI4896S002783	26/E04	-7.45	SPAC1F8.03c		membrane transporter; siderochrome-iron transporter activity; involved in iron-siderochrome transport; involved in iron homeostasis; similar to Sp SPCC61.01C and SPBC4F6.09
TI4896S002638	34/F04	-6.61	SPBC16G5.09		serine carboxypeptidase family; peptidase family S10; predicted N-terminal signal sequence
TI4896S003155	29/H08	-5.10	SPAC821.09	eng1	glycosyl hydrolase family 81; endo-1,3-beta-glucanase; involved in septation; involved in cytokinesis; involved in cell separation; non-essential; GPI anchored protein; glycoprotein; regulated by Ace2p; similar to Sp eng2
TI4896S000387	11/C10	-4.97	SPCC825.03c	psy1	SNARE; essential; involved in secretory pathway; transcription enhanced during sporulation; interacts genetically with spo3
TI4896S001876	38/G07	-4.75	SPBC1921.05	ape1	aminopeptidase I; peptidase family M1
TI4896S003200	23/B03	-4.58	SPAC30D11.10	rad22	involved in DNA repair; involved in meiotic recombination; involved in meiotic gene conversion (required); interacts physically with Rhp51p; involved in mating-type determination binds to double-strand breaks; interacts physically with Rhp51p
TI4896S003892	30/E03	-4.54	SPAC6F6.06c		involved in cell polarity
TI4896S001682	34/B05	-4.42	SPBC1A4.03c	top2	DNA topoisomerase II; DNA gyrase B domain
TI4896S000104	25/C07	-4.39	SPCC553.01c	SPCC736.01c	conserved hypothetical; hypothetical protein; possibly involved in signal transduction, as the only detectable defect of the null mutant of the S. cerevisiae homolog YGR042w is in heterologous signal transduction
TI4896S002859	29/C12	-4.15	SPAC1F5.06		heat shock protein 70 family; chaperone
TI4896S002484	31/A08	-4.04	SPBC23E6.04c		ubiquitin-protein ligase (E3); associates with the 26S proteasome; HECT domain; ankyrin or armadillo repeats
TI4896S002482	47/H05	-3.99	SPBC23E6.02		zinc finger protein; zf-C3HC4 type (RING finger); ubiquitin ligase (E3); SNF2 family; DEAD/DEAH box helicase; helicase C-terminal domain; involved in DNA repair; similar to Sp SPAC17A2.12
TI4896S000461	29/H01	-3.98	SPCC23B6.04c		conserved CRAL/TRIO domain protein; sec14 cytosolic factor family; involved in lipid movement between membranes
TI4896S002980	28/E05	-3.97	SPAC13A11.01c	SPAC2F7.18c	GTPase activator; Rho specific; RhoGAP domain; DEP domain; FCH domain; predicted coiled-coil region; phosphorylated by Shk1p;
TI4896S003100	33/H05	-3.89	SPAC23G3.08c	ubp7	ubiquitin C-terminal hydrolase activity
TI4896S004904	30/C03	-3.87	SPAC14C4.02c	spr18	SMC family protein; possibly dimerizes with rad18
TI4896S002876	24/G11	-3.86	SPAC12G12.14c		polyadenylation factor I subunit; essential (pers. comm. Chris Norbury); mRNA 3'-end processing; WD repeat protein; human ortholog fSAP57 has been isolated with functional spliceosomes; (old-> hypothetical Trp-Asp repeats containing protein)
TI4896S001264	30/C02	-3.84	SPBC146.01	SPBP35G2.15	RNA polymerase II holoenzyme component; mediator complex
TI4896S001192	38/B01	-3.77	SPBC530.05		transcriptional regulator; zinc finger protein; zf-fungal Zn(2)-Cys(6) binuclear cluster domain; similar to A. nidulans transcriptional activator required for growth on acetate
TI4896S001886	37/B10	-3.70	SPBC21D10.05c		GTPase activating protein; UBA domain; involved in protein deubiquitination (implicated); ubiquitin-binding protein; overexpression supresses cdc2 mutant (pers. comm. Nancy Walworth)
TI4896S004547	34/B10	-3.68	SPAC1527.01	mok11; SPAC23D3.15	a-1,3-glucan synthase; alpha glucan synthase; glycosyl transferase family 1; similar to Sp MOK1 and MOK12 and MOK13 and MOK14; involved in cell wall biosynthesis; no apparent Sc ortholog
TI4896S001255	48/D11	-3.68	SPBP35G2.06c		nucleoporin; nuclear pore complex (putative)
TI4896S000180	29/G01	-3.66	SPCC970.08		inositol polyphosphate kinase
TI4896S004999	29/G11	-3.64	SPAC922.02c	SPAC1039.11c	alpha-glucosidase; glycosyl hydrolase family 3; GPI anchored protein 1; similar to Sp agl1 and SPAC30D11.01c
TI4896S004428	28/F12	-3.62	SPAC23A1.04c		glycosyl hydrolase family 47
TI4896S001226	49/E10	-3.61	SPBC216.01c	SPBC713.13c	eukaryotic conserved protein
TI4896S002528	04/B01	-3.55	SPBC26H8.13c		very hypothetical protein; sequence orphan
TI4896S001266	34/A12	-3.51	SPBC146.03c	cut3	condensin subunit; SMC4 subunit; essential; involved in chromosome segregation (required) (mitosis); involved in chromosome condensation (required) (mitosis); NTP binding motif; phosphorylated by Cdc2p
TI4896S004748	38/E03	-3.41	SPAC4F10.09c		involved in ribosome biogenesis and assembly; CAATT-binding factor homolog
TI4896S004491	29/A06	-3.31	SPAC1F7.11c		transcriptional regulator; zinc finger protein; zf-fungal Zn(2)-Cys(6) binuclear cluster domain; similar to Sp SPAC139.03 and SPBC16G5.16 and SPAC3C7.04 (paralogs)
TI4896S004189	37/H12	-3.31	SPAC3A11.08	pcu4; Cul-4	cullin family; regulator of ribonuceotide reductase localization; copurifies with signalosome
TI4896S000245	34/F05	-3.27	SPCC16C4.02c		sequence orphan; hypothetical protein
TI4896S003363	39/D06	-3.25	SPAC57A7.11	mip1	putative guanine nucleotide binding protein WD repeat protein; facilitates function of the meiotic regulator Mei2p
TI4896S001693	37/E02	-3.24	SPBP23A10.04		anaphase-promoting complex (APC); required for cyclin degradation; involved in metaphase-anaphase transition; cullin family
TI4896S003598	28/D11	-3.20	SPAC3C7.04		transcriptional regulator; zinc finger protein; zf-fungal Zn(2)-Cys(6) binuclear cluster domain; putative metabolic control; similar to Sp thi1
TI4896S002319	43/C03	-3.16	SPBC2G2.10c		sequence orphan; hypothetical protein
TI4896S003945	47/G08	-3.15	SPAC8F11.03	swi4	MutS family; involved in mating-type determination
TI4896S001283	34/H05	-3.14	SPBC337.07c		carboxypeptidase; metalloprotease; peptidase family M14
TI4896S003115	28/A05	-3.13	SPAC1687.05	pli1	septin interacting protein homolog; zinc finger protein; zf-MIZ; SAP domain; DNA-binding protein; septin-sumoylation; possibly interacts with ubiquitin conjugating enzyme
TI4896S001742	28/D07	-3.12	SPBC23G7.06c		hypothetical protein; pleckstrin homology domain
TI4896S003364	29/E05	-3.08	SPAC57A7.10c	sec21	adaptin; coatomer (gamma subunit); the coatomer is a cytosolic protein complex that binds to dilysine motifs and reversibly associates with Golgi non- clathrin-coated vesicles, which further mediate biosynthetic protein transport from the ER, via the Golgi up to the trans Golgi network; coatomer complex is required for budding from Golgi membranes, and is essential for the retrograde Golgi-to-ER …
TI4896S002328	26/C01	-3.02	SPBC1718.02		zinc finger protein; zf-PHD finger; involved in transcriptional regulation; no apparent orthologs
TI4896S003402	29/E04	-2.96	SPAP27G11.05c	vps41	WD repeat protein; involved in intracellular protein transport; involved in vacuole fusion
TI4896S003091	38/G04	-2.96	SPAC521.04c		calcium permease
TI4896S004290	11/F08	-2.93	SPAC15A10.09c		sequence orphan; hypothetical protein
TI4896S001404	47/A01	-2.85	SPBC30B4.04c		transcriptional regulator; ARID DNA-binding domain
TI4896S001630	27/D02	-2.83	SPBC28E12.02	SPBC9B6.13	conserved hypothetical protein
TI4896S002501	27/C01	-2.81	SPBC1604.19c		TRAPP; involved in intracellular protein transport; similar to Sp SPBC1734.07C (paralog)
TI4896S001166	32/E01	-2.79	SPBC119.11c	pac1; hcs	double-strand-specific ribonuclease; overexpression inhibits sexual development
TI4896S001382	36/C08	-2.78	SPBC651.09c		RNA polymerase II associated Paf1 complex; involved in TATA site selection; involved in regulation of transcription elongation
TI4896S004487	19/A08	-2.77	SPAC1F7.07c	fip1	iron permease
TI4896S003955	29/E10	-2.76	SPACUNK4.16c		glycosyl transferase family 20; alpha,alpha-trehalose-phosphate synthase; involved in the de-phosphoryulation of trehalose-6-phosphate to trehalose and orthophosphate; similar to Sp SPAC22F8.05
TI4896S000614	37/F04	-2.76	SPCC663.14c		hypothetical protein; similar to Sp SPAC1F7.03
TI4896S001764	32/H01	-2.74	SPBC1711.13	his2	histidinol dehydrogenase
TI4896S004100	28/H08	-2.71	SPAC6G10.09		mannosyl-oligosaccharide glucosidase; glycosyl hydrolase family 63
TI4896S000573	31/B06	-2.66	SPCC162.08c		nuclear pore complex associated; similar to Sp SPAC1486.04c; predicted coiled-coil protein
TI4896S001999	23/G12	-2.66	SPBC18A7.02c		MFS transporter
TI4896S001298	18/D06	-2.66	SPBC1734.06	rhp18	zinc finger protein; zf-C3HC4 type (RING finger); ubiquitin ligase (E3); SAP domain; DNA-binding protein; involved in DNA repair; involved in post-replication repair; required for DNA damage responses throughout the cell cycle
TI4896S000760	30/B01	-2.65	SPCC1739.11c	cdc11	involved in septation; SIN component; leucine-rich repeat protein; localizes components of the SIN to the SPB; phosphoprotein; essential
TI4896S003875	17/B11	-2.62	SPAC644.14c	rad51; rhp51	RecA-like protein; involved in DNA repair; interacts physically with Rad22p; involved in meiotic recombination; involved in meiotic gene conversion (required); AAA family ATPase; helix-hairpin-helix; DNA-binding protein; telomere binding; involved telomere maintenance (in the absence of Ku) (required); AAA family ATPase
TI4896S002434	27/H12	-2.62	SPBC13G1.05		conserved eukaryotic protein
TI4896S000985	30/D08	-2.62	SPBC800.10c		actin cortical patch component; involved in endocytosis; predicted coiled-coil region; EF hand motifs; similar to Sp SPBC83.01 and SPAC25G10.09C
TI4896S001834	46/B11	-2.60	SPBC24C6.02		putative ATP dependent RNA helicase DEAD/DEAH box helicase; ATP-dependent; RNA helicase; helicase C-terminal domain; involved in 35S transcript processing; involved in ribosome biogenesis and assembly
TI4896S004941	38/B06	-2.58	SPAP8A3.05		translation release factor
TI4896S004071	28/A01	-2.58	SPAC3G9.05		GIT repeat protein (SMART); ADP-ribosylation factor; GTPase-activating protein; involved in cell polarity; involved in conjugation; involved in conjugation with cellular fusion; predicted coided-coil region
TI4896S001079	31/E05	-2.57	SPBC1685.02c	rps1202; rps12-2	40S ribosomal protein S12; non-essential
TI4896S004576	27/A05	-2.56	SPAC9E9.08	rad26	involved in DNA repair, DNA damage checkpoint, DNA replication checkpoint, G2/M transition checkpoint
TI4896S001413	33/H11	-2.56	SPBC27B12.06		involved in GPI anchor biosynthesis; involved in adding phospho-ethanolamine to the third mannose
TI4896S000195	48/D09	-2.55	SPCP31B10.06		putative synaptic vesicle protein; C2 domain; similar to Sp SPCC962.01
TI4896S000074	04/C07	-2.55	SPCC548.04		putative ubiquitin-related protein
TI4896S001873	20/D02	-2.54	SPBC1921.02	rad60	involved in DNA repair; involved in double-strand break repair (required); predicted coiled-coil region; no apparent orthologs
TI4896S004713	04/C04	-2.54	SPAC1782.10c	nhp2	involved in rRNA pseudouridinylation
TI4896S000283	27/A04	-2.54	SPCC1020.10	oca2	serine/threonine protein kinase; overexpression results in cell cycle defects
TI4896S003280	29/A12	-2.54	SPAC6F12.01	SPAC1565.08	AAA family ATPase; Cdc48-Ufd1-Npl4 complex component (putative); involved in ubiquitin-dependent proteolysis; involved in proteasomal processing; involved in the recognition of polyubiquitin-tagged proteins; transitional ER ATPase
TI4896S003320	21/E11	-2.53	SPAC3A12.01c	SPAC20G8.10c	involved in autophagy; beclin related
TI4896S004533	19/E01	-2.52	SPAC23D3.01		conserved hypothetical; PWWP domain protein; involved in cell growth; similar to Sp SPBC215.07C and SPBC29A3.13C (paralogs)
TI4896S002558	29/B02	-2.52	SPBC215.01	SPBC3B9.20	TBC domain protein; EF hand motifs; calcium binding protein; GTPase activating protein of Rab-like GTPase
TI4896S000612	15/A07	-2.49	SPCC663.12	cid12	poly(A) polymerase
TI4896S000277	31/A03	-2.49	SPCC14G10.02	SPCC18B5.13	hypothetical protein
TI4896S002380	34/B09	-2.49	SPBC16D10.05	mok13	a-1,3-glucan synthase; alpha glucan synthase; glycosyl transferase family 1; similar to Sp MOK1 and MOK11 and MOK14 and MOK12; involved in cell wall biosynthesis; no apparent Sc ortholog
TI4896S003457	20/A06	-2.49	SPACUNK12.02c	cmk1	serine/threonine protein kinase; calmodulin kinase I homolog; CaM-dependent protein kinase; cell cycle-dependent expression; predicted regulatory site (Thr-192)
TI4896S002821	28/B09	-2.48	SPAC13G6.03		involved in glycosylphospatidylinositol modification; phosphoethanolamine N-methyltransferase activity
TI4896S001353	32/C04	-2.47	SPBC4.05	mlo2	zinc finger protein; zf-PHD finger; involved in transcriptional regulation; no apparent Sc ortholog; similar to D. melanogaster CG15141; non-essential
TI4896S000579	29/G05	-2.47	SPCC162.02c		AMP-binding dehydrogenase; involved in antibiotic synthesis in bacteria; no apparent Sc ortholog
TI4896S000522	44/F04	-2.47	SPCC622.14		zinc finger protein; zf-GCS type; putative ADP-ribosylation factor; GTPase-activating protein
TI4896S005005	35/H10	-2.46	SPAC922.08c	SPAC869.11	APC amino acid transporter (putative); similar to Sp SPBC359.01C and SPBC359.03C and SPAP7G5.06 and SPBPB2B2.01 and ISP5(paralog); closely related paralogous family; amino acid permease family; similar to Sp SPAP7G5.06 and SPBC359.01 and meu22 and SPBPB2B2.01 and isp5
TI4896S000369	25/C08	-2.46	SPCC1795.09		aspartic protease; yapsin subfamily; GPI anchored protein; glycoprotein; spcificity C terminal to basic or dibasic amino acids; cleavage site Ser-17; cleavage site Lys-Arg45; localization cell wall; GPI attachment site Asn-495; involved in cell wall biosynthesis (implicated); overexpression rescues krp1 mutant
TI4896S003877	22/G07	-2.45	SPAC644.16		RNA-binding protein; involved in polyadenylation; rrm RNA recognition motif
TI4896S003253	39/B08	-2.44	SPAC10F6.09c	psm3; smc3	putative chromosome-associated protein cohesin subunit; predicted coiled-coil protein; SMC family; involved in sister chromatid cohesion; smc1 dimerization partner; involved in DNA repair
TI4896S002863	23/H01	-2.44	SPAC1F5.02		protein disulphide isomerase
TI4896S004615	39/B05	-2.44	SPAC637.02c	tpr1; SPAC27D7.14c	tetratricopeptide repeat protein TPR repeat protein; involved in regulation of transcription elongation; RNA polymerase II associated Paf1 complex; involved in potassium transport
TI4896S001631	30/B03	-2.43	SPBC28E12.03	rga4	GTPase activator; RhoGAP domain
TI4896S004018	37/A11	-2.42	SPAC1786.02		lysophospholipase; similar to Sp SPAC977.09c and SPAC1A6.03c and SPCC1450.09c and SPBC1348.10c and SPAC1A6.04c; GPI anchored protein (pers. comm. Birgit Eisenhaber); glycoprotein
TI4896S002645	29/F07	-2.38	SPBC16G5.16		transcriptional regulator; zinc finger protein; zf-fungal Zn(2)-Cys(6) binuclear cluster domain
TI4896S003942	22/E07	-2.37	SPAC3F10.17		conserved hypothetical; involved in stress response
TI4896S004500	05/C07	-2.35	SPAC2C4.03c	smd2; cwf9	small nuclear ribonucleoprotein; involved in mRNA splicing; complexed with Cdc5p
TI4896S000367	26/F10	-2.34	SPCC1795.11	sum3; ded1; slh3; moc2	DEAD/DEAH box helicase; ATP-dependent RNA helicase; involved in translation initiation; essential; suppressor of uncontrolled mitosis; interacts physically with Chk1p; interacts physically with Cdc2p
TI4896S001985	33/H07	-2.33	SPBC4F6.06	kin1	serine/threonine protein kinase; involved in cell polarity (implicated); involved in cellular morphogenesis
TI4896S004138	25/F10	-2.33	SPAC26A3.01	sxa1; SPAC2E1P5.06	aspartic protease; involved in conjugation; GPI anchored protein(pers. comm. Birgit Eisenhaber); glycoprotein; no apparent Sc ortholog
TI4896S002853	30/D11	-2.33	SPAC1F5.12	trk2; SPAC1639.02c	similar to Sp trk1; TrkH domain
TI4896S000889	04/C08	-2.33	SPCC70.10		Sp specific families; glycoprotein; confirmed by mRNA
TI4896S002603	22/F06	-2.32	SPBC1861.06c	B8647-1	Sp specific families; Pfam-B_8647 domain
TI4896S002227	35/F07	-2.30	SPBC19F8.06c	meu22	meiotic expression upregulated; amino acid permease family; similar to Sp SPAP7G5.06 and SPAC869.11 and SPBC359.01 and SPBC359.01 and SPBPB2B2.01 and isp5
TI4896S003595	36/G05	-2.30	SPAC3C7.01c	SPAC732.03c	inositol polyphosphate phosphatase; similar to Sp SPBC19F5.03
TI4896S000542	51/E08	-2.30	SPCC188.02	par1	protein phosphatase PP2A, subunit B'; involved in cytokinesis; involved in cellular morphogenesis; involved in stress tolerance; implicated in the regulation of the septation initiation network
TI4896S004678	01/F02	-2.30	SPAC1834.03c	h4.1; hhf1	histone H4
TI4896S004446	48/D01	-2.25	SPAC26H5.05		involved in transcriptional regulation; ankyrin repeat protein
TI4896S001454	32/D07	-2.25	SPBC8D2.17		alpha-1,2-galactosyltransferase; GMA12/MNN10 family; predicted N-terminal signal sequence; similar to S. pombe gmh1 and gmh3 and gmh2 and gma12 and SPAC5H10.13C and SPBC1289.13c and SPAC637.06 paralogs
TI4896S000772	10/B07	-2.24	SPCC576.04		hypothetical protein; UPF0005
TI4896S003887	31/B08	-2.23	SPAC6F6.01		VIC sodium channel
TI4896S000398	18/H02	-2.21	SPCC1259.08		sequence orphan; hypothetical protein
TI4896S004059	30/A10	-2.21	SPAC688.07c		serine-rich protein
TI4896S001582	32/D09	-2.20	SPBC2F12.09c	atf21	atf creb-family transcription factor; bZIP (basic leucine zipper) transcription factor family; involved in regulation of conjugation (regulation), regulation of meiosis; similar to Sp atf1 and pcr1 (paralogs); no apparent Sc ortholog
TI4896S004884	29/G09	-2.19	SPAC26F1.08c		conserved hypothetical; hypothetical protein
TI4896S001603	33/A03	-2.16	SPBC18H10.04c	sce3	RNA-binding protein; rrm RNA recognition motif; suppressor of cdc11 septation defect
TI4896S001623	42/G10	-2.16	SPBC9B6.06		mitochondrial ribosomal protein L15 family (L10)
TI4896S001385	10/F03	-2.16	SPBC651.12c		hypothetical protein; sequence orphan
TI4896S000814	31/B02	-2.16	SPCC830.01c	SPCC1620.14c	SNF2 family; helicase C-terminal domain; AT hook protein; bromodomain protein; similar to Sp SPAC1250.01 (paralog)
TI4896S004518	33/G11	-2.15	SPAC25G10.04c	rec10	involved in meiotic recombination (required); involved in sister chromatid cohesion; no apparent orthologs
TI4896S003377	48/B07	-2.15	SPAC167.01		serine/threonine protein kinase; involved in unfolded protein response
TI4896S004093	30/D12	-2.15	SPAC6G10.02c	tea3	predicted coiled-coil; similar to Sp tea1; involved in NETO; predicted cell end marker required to activate polarized cell growth at the second end during NETO
TI4896S003490	36/C02	-2.15	SPAC1002.10c		eukaryotic conserved protein; no apparent Sc ortholog
TI4896S002005	32/B12	-2.15	SPBC336.06c	rnh1	ribonuclease H activity
TI4896S004191	38/F12	-2.14	SPAC3A11.06	mvp1	phosphoinositide binding; PX domain; involved in intracellular protein transport
TI4896S003167	44/G05	-2.14	SPAC23C4.01	SPAC139.06	histone acetyltransferase (type b) (catalytic subunit)
TI4896S001592	39/E12	-2.14	SPBC1D7.02	scr1; SPBC1D7.02c	glucose mediated repressor of Inv1 transcriptional regulator; zinc finger protein; zf-C2H2 type; glucose mediated repressor of inv1 and fbp1
TI4896S001655	33/A06	-2.12	SPBP16F5.06		involved in ribosome biogenesis and assembly; rrm RNA recognition motif; RNA-binding protein
TI4896S002196	40/E03	-2.12	SPBC776.02c	bws1; dis2; sds1	serine/threonine protein phosphatase pp1-1; involved in sister chromatid separation (implicated) (mitosis); required for chromosome disjoining
TI4896S000439	26/B07	-2.12	SPCC550.13	rad35; dfp1; him1	essential; Hsk1-Him1p/Dfp1p complex; regulatory subunit of the Hsk1p-Dfp1p kinase; involved in S-phase initiation (required); involved in S-phase checkpoint control (required); involved in entry into S phase; involved in DNA damage recovery (required); BRCT domain; zinc finger protein; zf-DBF type; involved in G1/S phase transition; zf-DBF motif has a role in maintaining chromosome stability foll…
TI4896S003732	48/B05	-2.11	SPAC22H10.03c	kap114	ranbp7-importin-beta-cse1p family protein
TI4896S004073	22/F12	-2.11	SPAC3G9.07c	phd1; hda1	transcriptional regulator; histone deacetylase; NAD-independent histone deacetylase activity; RPD3-like (class I); involved in transcriptional regulation; involved in chromatin silencing; involved in chromatin assembly/disassembly
TI4896S001363	27/D09	-2.11	SPBC725.08		zinc finger protein
TI4896S004030	28/H02	-2.11	SPAC24C9.11		MIF4G domain; MA3 domain; involved in signal transduction
TI4896S001138	23/H09	-2.10	SPBC947.12	kms2	predicted coiled-coil; similar to Sp kms1, a protein required for the formation of meiotic prophase-specific nuclear architecture
TI4896S004357	24/A04	-2.10	SPAC926.02		hypothetical protein
TI4896S003971	01/D10	-2.10	SPAC513.04		hypothetical protein
TI4896S002933	29/F09	-2.10	SPAC24H6.11c		putative SulP sulfate transporter; STAS domain; cyclic nucleotide-binding domain
TI4896S000101	26/D12	-2.10	SPCC553.04	cyp9	cyclophilin; peptidyl-prolyl cis-trans isomerase; no apparent Sc ortholog
TI4896S004883	30/A05	-2.09	SPAC26F1.09		GTPase activating protein predicted; target Rab-like GTPase predicted; TBC domain protein; similar to S. pombe SPCC1620.12
TI4896S001249	35/F04	-2.08	SPBC855.01c	SPBC646.17c; SPBP35G2.01c	WD repeat protein; no apparent Sc ortholog; non-essential
TI4896S002135	29/B01	-2.08	SPBC13E7.01	cwf22; SPBC15D4.16	eukaryotic conserved protein; MIF4G domain; MA3 domain; complexed with Cdc5p; human ortholog fSAPb has been isolated with functional spliceosomes
TI4896S004106	17/C11	-2.08	SPAC6G9.03c		conserved hypothetical protein; similar to SSRP proteins
TI4896S002375	15/A06	-2.07	SPBC16D10.01c	SPBC418.03c	TPR repeat protein; possibly interacts with protein phosphatase 2C
TI4896S003206	48/D05	-2.07	SPAC30D11.04c	nup124	nuclear pore complex
TI4896S003209	47/F07	-2.07	SPAC30D11.01c	SPAC56F8.01	alpha-glucosidase; glycosyl hydrolase family 31; similar to Sp agl1 and SPAC922.02c
TI4896S003432	42/H04	-2.05	SPAC343.18		zf-C3HC4 type (RING finger); ubiquitin ligase (E3); similar to Sp SPAC19A8.10 (paralog); no apparent Sc ortholog
TI4896S001032	24/H10	-2.05	SPBC106.10	pka1; tpk; git6	cAMP-dependent protein kinase (catalytic subunit); serine/threonine protein kinase; involved in conjugation (regulation) (negative); involved in the regulation of meiosis (negative); involved in protein amino acid phosphorylation (of Mei3p); overexpression results in cell cycle defects; non-essential
TI4896S002147	24/E11	-2.05	SPBC30D10.17c		glucan synthase regulator; involved in beta-1,3 glucan biosynthesis; involved in cell wall organization and biogenesis; similar to N. crassa GS-1
TI4896S003207	38/C09	-2.03	SPAC30D11.03		DEAD/DEAH box helicase; helicase C-terminal domain; involved in 35S transcript processing; ATP-dependent; RNA helicase
TI4896S002533	34/A05	-2.03	SPBC26H8.10	dis3	involved in the regulation of mitosis; involved in anaphase (required); exosome (RNase complex); 3'-5' exoribonuclease; involved in rRNA processing; essential; RNB domain; ribonuclease family signature; possibly binds directly to Ran and enhances the GEF activity of SPAC10F6.04 (check)
TI4896S001400	37/G11	-2.03	SPBC3D6.13c		glycoprotein; thioredoxin related glycoprotein; thioredoxin domain; similar to Sp SPAC959.05C and SPCC1840.08C (paralogs)
TI4896S000891	27/A12	-2.03	SPCC1827.01c		eukaryotic conserved protein
TI4896S002456	31/A06	-2.03	SPBC31F10.14c		TPR repeat protein; histone transcriptional regulator
TI4896S004269	26/H07	-2.02	SPAC8C9.04		sequence orphan; hypothetical protein
TI4896S004266	38/A12	-2.01	SPAC1142.08	SPAC8C9.01	involved in transcriptional activation; fork head domain; FHA domain (phosphopeptide binding)
TI4896S002291	21/A05	-2.01	SPBC3B8.03		saccharopine dehydrogenase [NADP+, l-glutamate forming]; involved in lysine biosynthesis (7th step)
TI4896S001440	31/H03	-2.01	SPBC8D2.02c		fungal conserved protein
TI4896S002833	04/F09	-2.01	SPAC24B11.04c	SPAC13G6.15c	calcipressin; calcineurin-binding protein; involved in calcium-mediated signalling; calcineurin complex
TI4896S003268	36/D01	-2.00	SPAC1420.01c	SPAC56E4.08c	hypothetical protein; sequence orphan
TI4896S003065	27/F05	-2.00	SPAC4G8.13c		transcriptional regulator; zinc finger protein
TI4896S000200	29/H06	-2.00	SPCC962.02c	cut17; pbh1; bir1; SPCP31B10.10c	survivin; inhibitor of apoptosis domain; involved in chromosome segregation (required); involved in chromosome condensation (required); involved in spindle elongation (required)
TI4896S002089	37/A05	-2.00	SPBC1703.15c	vps33; SPBC2A9.01c	sec1 family; involved in vacuolar biogenesis (required); SNARE binding activity; SNARE docking complex (TRAPP?); involved in non-selective vesicle docking; syntaxin binding protein; involved in intracellular protein transport; involved in secretory pathway; involved in exocytosis; involved in non-selective vesicle docking; involved in ER to Golgi transport; involved in vacuole fusion
TI4896S002062	32/G06	-2.00	SPBP4H10.09	rsv1	transcription factor; zinc finger protein; zf-C2H2 type; stationary phase viability protein; required for cell viability in glucose starved environment; similar to Sp src1 (paralog)
TI4896S003232	35/C02	-1.99	SPAC22A12.09c	sap114	involved in mRNA splicing; Surp domains; complexed with Cdc5p
TI4896S001607	44/C04	-1.99	SPBC18H10.08c	ubp4	ubiquitin C-terminal hydrolase activity
TI4896S003186	16/H04	-1.99	SPAC1A6.02	SPAC23C4.21	WD repeat protein; involved in mRNA splicing
TI4896S003064	36/H12	-1.98	SPAC4G8.12c		PMP protein; involved in GPI anchor biosynthesis (SGD); alpha-1,2 mannosyltransferase; involved in addition of the fourth, side-branching mannose onto the GPI core structure (SGD)
TI4896S004599	33/F10	-1.98	SPAC17C9.01c	nuc2; SPAC1851.01c	anaphase-promoting complex (APC); involved in G1 arrest after nitrogen starvation (required); involved in cyclin degradation; involved in metaphase-anaphase transition; involved in cytokinesis (regulation); involved in septation (regulation) (negative)
TI4896S001528	33/G09	-1.97	SPBC29B5.02c	isp4	involved in sexual differentiation; OPT oligopeptide transporter family
TI4896S004200	38/A08	-1.97	SPAC328.04		AAA family ATPase; CDC48/PAS1/SEC18 family; similar to katanin; putative microtubule severing protein by similarity
TI4896S004880	18/D03	-1.96	SPAC26F1.12c		eukaryotic conserved protein; similar to human HMG1 and HMG2 proteins
TI4896S004676	32/G12	-1.96	SPAC1834.01	sup45	translation release factor; directs the termination of nascent peptide synthesis
TI4896S003848	29/D07	-1.95	SPAC7D4.04		involved in response to nitrogen starvation (required); involved in nitrogen starvation-induced sexual development (required); involved in G0 phase transition (required); interacts physically with Taz1p; predicted coiled-coil region
TI4896S001570	25/H11	-1.95	SPBC19C2.10		conserved hypothetical; src (SH3) homology domain; no apparent Sc ortholog
TI4896S003756	20/D10	-1.95	SPAC6B12.08		zinc finger protein; zf-C2H2 type; DNAJ domain protein
TI4896S001365	04/F04	-1.94	SPBC725.10		similar to peripheral-type benzodiazepine receptor; no apparent Sc ortholog; non-essential
TI4896S003879	08/B12	-1.94	SPAC644.18c	bet3	TRAPP; involved in intracellular protein transport; involved in ER to Golgi transport
TI4896S000222	17/B07	-1.94	SPCC1183.06	ung1	uracil DNA N-glycosylase; uracil DNA N-glycosylase activity; overexpression induces checkpoint-dependent cell cycle delay
TI4896S003047	34/C07	-1.94	SPAC22G7.06c	ura1	ATP-binding protein; involved in glutamate metabolism; involved in pyrimidine base biosynthesis; involved in aspartate metabolism; carbamoyl-phosphate synthase (glutamine hydrolyzing) activity; aspartate carbamoyltransferase activity; transferase activity, transferring pentosyl groups; dihydroorotase activity
TI4896S000942	27/C10	-1.93	SPBC1683.13c		transcriptional regulator; zinc finger protein; similar to Sp SPCC757.04 and SPCC777.02
TI4896S004430	26/G08	-1.92	SPAC23A1.06c	cmk2	MAPK-activated protein kinase; serine/threonine protein kinase; calmodulin dependent; involved in oxidative stress response (required); overexpression suppresses DNA replication checkpoint defects; involved in G2/M phase progression; non-essential; similar to Sp SPCC1322.08 (paralog); interacts physically with Sty1p; phosphorylated by Sty1p; overexpression blocks the cell cycle at G2 phase
TI4896S003102	32/G05	-1.92	SPAC23G3.10c		involved in transcriptional regulation, chromatin remodeling
TI4896S000521	48/B09	-1.91	SPCC622.13c		hypothetical protein
TI4896S001105	47/A04	-1.91	SPBC354.08c		conserved hypothetical; hypothetical protein; DUF221; involved in sporulation; non-essential
TI4896S004630	26/A10	-1.90	SPAC12B10.03		conserved hypothetical; WD repeat protein; no apparent Sc ortholog
TI4896S001707	32/G01	-1.89	SPBC29A3.02c	his7	phosphoribosyl-AMP cyclohydrolase; involved in histidine metabolism
TI4896S003722	36/D06	-1.89	SPAC17G8.06c	ilv3	dihydroxy-acid dehydratase; involved in branched chain amino acid biosynthesis
TI4896S002678	31/G05	-1.88	SPBC543.10		predicted coiled-coil protein; similar to human congenital heart disease 5 protein chd5
TI4896S001975	27/C05	-1.88	SPBC3E7.09		conserved hypothetical protein
TI4896S004088	19/F05	-1.86	SPAC1486.06		nicotinate phosphoribosyltransferase; involved in nicotinate metabolism; involved in nicotinamide metabolism
TI4896S004855	01/G07	-1.85	SPAC1250.04c		DNA repair methyltransferase (predicted); DNA-binding domain; involved in DNA repair; ribonuclease domain present in other eukaryotic homologs is missing check?
TI4896S000096	36/H01	-1.85	SPCC553.09c		DNA polymerase alpha subunit
TI4896S000227	29/H05	-1.84	SPCC1183.11	SPCC31H12.01	MS ion channel; EF hand motif; no apparent Sc ortholog; similar to Sp SPAC2C4.17C (paralog)
TI4896S003836	19/G02	-1.83	SPAC823.16c		conserved hypothetical; WD repeat protein
TI4896S003576	21/G06	-1.83	SPAC17H9.13c		glutamate 5-kinase; PUA domain
TI4896S003806	04/D08	-1.83	SPAC4A8.02c		hypothetical protein; UPF0047 family
TI4896S000553	25/H03	-1.83	SPCC584.11c		conserved hypothetical; hypothetical protein; similar to Sp SPBC36B7.02; low similarity to NIFD/NIFK/NIFE/NIFN family
TI4896S002855	22/F09	-1.82	SPAC1F5.10	tif412	translation initiation factor (4a subunit); DEAD/DEAH box helicase; similar to Sp SPAC1006.07
TI4896S002497	05/G04	-1.82	SPBC211.07c	ubc8	ubiquitin conjugating enzyme
TI4896S000740	31/A09	-1.82	SPCC290.03c		nucleoporin
TI4896S001383	18/D12	-1.81	SPBC651.10		sequence orphan; hypothetical protein
TI4896S001770	36/C05	-1.81	SPBC17G9.03c		lysine-tRNA ligase; involved in lysyl-tRNA aminoacylation; lysine-tRNA ligase activity
TI4896S003156	04/C02	-1.80	SPAC821.10c	sod1	Cu, Zn-superoxide dismutase; induced by Pap1p; induced by oxidative stress
TI4896S000381	28/F05	-1.80	SPCC895.06		WD repeat protein
TI4896S000556	22/E06	-1.80	SPCC584.14		eukaryotic conserved protein
TI4896S002885	04/F10	-1.79	SPAC12G12.05c		transcription initiation factor TFIID subunit; TAF(II) complex (TBP-associated protein complex); SAGA complex; involved in establishment and/or maintenance of chromatin architecture
TI4896S002348	39/G04	-1.79	SPBC1105.12	hhf3; h4.3	histone H4 histone h4; similar to Sp hhf1
TI4896S000559	47/G05	-1.79	SPCC584.01c		sulfite reductase; NADPH flavoprotein subunit
TI4896S004755	30/F11	-1.79	SPAC4F10.16c		P-type ATPase; P4 type; aminophospholipid translocase
TI4896S002320	25/D04	-1.79	SPBC2G2.11		glycylpeptide N-tetradecanoyltransferase; involved in N-terminal protein myristoylation
TI4896S001689	27/F03	-1.79	SPBC1A4.09	SPBC1A4.09b	conserved protein
TI4896S003612	32/D06	-1.79	SPAC631.01c		F-actin capping protein (beta subunit); involved in F-actin capping; actin cortical patch component; involved in actin filament organization
TI4896S004690	33/F11	-1.79	SPAC17D4.03c		metal transporter; cation efflux family
TI4896S000321	30/E07	-1.78	SPCC63.14		conserved in N. crassa; predicted coiled-coil region
TI4896S000757	09/H02	-1.78	SPCC1739.08c		short chain dehydrogenase; involved in sorbitol utilization; similar to Sp SPAC22A12.17C and SPAC8E11.10; no apparent Sc ortholog
TI4896S002613	39/D05	-1.78	SPBC14F5.07		putative mRNA stability protein zinc finger protein; zf-C3HC4 type (RING finger); ubiquitin ligase (E3); involved in mRNA stability; involved in polyadenylation
TI4896S003514	50/F07	-1.78	SPAPB1A10.07c		hypothetical protein; TMS membrane protein/ tumour differentially expressed protein (TDE) domain
TI4896S001051	29/C11	-1.78	SPBC582.10c		DEAD/DEAH box helicase; involved in nucleotide-excision repair; involved in DNA repair; SNF2 familyhelicase; C-terminal domain; non-essential
TI4896S004833	38/E02	-1.78	SPAC22E12.11c		involved in transcriptional regulation; zinc finger protein; zf-PHD finger; SET domain; histone lysine methyltransferase
TI4896S002805	24/B10	-1.78	SPAC11D3.18c		membrane transporter; unknown specificity; similar to Sp SPAC1039.04 and SPAC1683.12 and SPAC1002.16C
TI4896S003640	27/F06	-1.78	SPAC23C11.16	plo1	Polo kinase Plo1; essential; serine/threonine protein kinase; involved in spindle formation, contractile ring assembly, contractile ring positioning, septation; functional homolog of Sc CDC5; interacts physically with Cut12p; stress response pathway signalling (SRP), mediated phosphorylation of Ser402 regulates the timing of commitment to mitosis; stress response pathway signalling (SRP), mediate…
TI4896S003811	24/G05	-1.78	SPAC4A8.07c		diacylglycerol kinase; involved in sphingolipid metabolism; sphingoid long chain base (LCB) kinase; similar to S. cerevisiae YOR171C and YLR260W
TI4896S002656	28/C12	-1.78	SPBC16A3.13	meu7	alpha-amylas; large repeat insertion potential glycosylation sites; meiotic expression upregulated; possibly Sp specific; GPI anchored protein; glycoprotein; no apparent Sc ortholog
TI4896S003903	30/G03	-1.77	SPAPJ736.01	rif1; tap1; tap11; SPAC6F6.17	involved in telomere maintenance; recruited to the telomeres by Taz1p
TI4896S003098	33/C07	-1.76	SPAC23G3.06		ribonucleoprotein complex; processome component; involved in rRNA processing; involved in ribosome biogenesis and assembly; snoRNA-binding protein
TI4896S004541	22/D12	-1.75	SPAC23D3.09		actin-related protein
TI4896S003341	38/F02	-1.75	SPAC9.05		DEAD/DEAH box helicase; ATP-dependent; RNA helicase; similar to Sp SPAC20H4.04 (paralog)
TI4896S002155	10/A04	-1.74	SPBC30D10.09c		hypothetical protein; TB2/DP1 domain
TI4896S003233	22/B04	-1.74	SPAC22A12.10		aminoalcoholphosphotransferase; involved in phosphatidylethanolamine biosynthesis
TI4896S004358	05/F10	-1.74	SPAC926.03	rlc1	myosin regulatory light chain (type II); interacts physically with Myo2p; interacts physically with Myo3p; EF hand motifs; calcium binding protein; non-essential; involved in cytokinesis; involved in myosin regulation; involved in contractile ring assembly; non-essential; deletion mutant results in cell cleavage defects; deletion mutant results in aberrant F-actin rings; relieves auto-inhibition …
TI4896S000971	33/H08	-1.73	SPBC31E1.02c	pgak2	P-type calcium ATPase; P2 type
TI4896S004917	38/F03	-1.73	SPAPJ760.01c	SPAC14C4.15c	dipeptidyl aminopeptidase
TI4896S001859	20/A07	-1.73	SPBC19G7.15		nucleoporin; nuclear pore complex
TI4896S002622	29/C09	-1.72	SPBC3F6.04c		ribonucleoprotein (RNP) complex; processome component; involved in rRNA processing; conserved eukaryotic protein; involved in ribosome biogenesis and assembly
TI4896S004086	34/B07	-1.71	SPAC1486.04c	alm1	coiled-coil protein; medial region associated during mitosis; deletion mutant results in elongated cells; involved in cytokinesis; non-essential; deletion mutant results in sporulation defects (non-germinating spores); heterozygous mutant spores germinated but produced smaller colonies
TI4896S000979	32/H06	-1.70	SPBC800.05c	atb2; alp2; tub1; ban5	tubulin (alpha-2 chain); involved in microtubule cytoskeleton organization and biogenesis (maintenance); non-essential
TI4896S004452	29/G06	-1.70	SPAC26H5.11		involved in spore wall assembly; pleckstrin homology domain
TI4896S001976	22/E12	-1.70	SPBC3E7.10		methionine aminopeptidase
TI4896S001273	04/D06	-1.69	SPBC146.10		hypothetical protein
TI4896S004836	26/H06	-1.69	SPAC22E12.14c		serine/threonine protein kinase; similar to Sp sck1 (paralog)
TI4896S000119	29/D11	-1.69	SPCC594.01	SPCC736.16	sequence orphan; hypothetical protein
TI4896S003069	24/B11	-1.69	SPAC16C9.03		involved in mRNA catabolism, nonsense-mediated
TI4896S002973	26/H01	-1.69	SPAC2F7.10		palmitoyltransferase activity; 6 ankyrin repeat protein; zinc finger protein; zf-DHHC type; AKR/ZDHHC17 subfamily; palmitoyltransferase specific for casein kinase 1 (By similarity)
TI4896S004845	21/A07	-1.69	SPAC1006.01		serine protease; similar to Sp SPAC4A8.04
TI4896S001450	33/C02	-1.69	SPBC8D2.13	pi052	involved in snoRNP biogenesis
TI4896S000718	35/A11	-1.69	SPCC74.04		amino acid permease family; similar to Sp SPBC15C4.04C and SPAPB24D3.02C and SPAC1039.01 and SPAC11D3.08C and SPCC584.13 and SPAC9.10 and SPCC794.03
TI4896S003594	19/E06	-1.69	SPAC732.02c		fructose-2,6-bisphosphatase
TI4896S001296	22/E01	-1.68	SPBC1734.04	SPBC337.20	alpha-1,6-mannosyltransferase complex subunit predicted; belongs to the ANP1/MMN9/VAN1 family; similar to S. cerevisiae YEL036C and YML115C and YPL050C
TI4896S003022	06/A12	-1.68	SPAC22F3.11c		hypothetical protein; sequence orphan
TI4896S002072	22/B08	-1.68	SPBP4H10.19c		calreticulin/calnexin homolog; no apparent Sc ortholog
TI4896S001390	31/D07	-1.68	SPBC3D6.15	rps2501; rps25-1	40S ribosomal protein S25
TI4896S001044	23/D02	-1.68	SPBC582.03	cdc13	G2/mitotic-specific cyclin; involved in control of mitosis, regulation of CDK activity, DNA damage checkpoint, DNA replication checkpoint; essential
TI4896S002549	18/E09	-1.68	SPBC3B9.11c	ctf1	involved in transcription termination; involved in polyadenylation; rrm RNA recognition motif; RNA-binding protein
TI4896S000715	46/F05	-1.68	SPCC74.01	sly1	sec1 family; SNARE binding activity; SNARE docking complex (TRAPP?); involved in non-selective vesicle docking; syntaxin binding protein; involved in intracellular protein transport; involved in secretory pathway; involved in exocytosis; involved in non-selective vesicle docking; involved in ER to golgi transport; interacts physically with Sed5p
TI4896S004195	36/E10	-1.67	SPAC3A11.02	scp3	zinc finger protein; zf-CCCH type; spindle poison (isopropyl N-3-chlorophenyl carbamate) sensitivity protein
TI4896S002487	29/G10	-1.67	SPBC23E6.07c	rfc1	replication factor C (activator 1) subunit; activator of DNA polymerases; BRCT domain; AAA family ATPase
TI4896S002600	37/G07	-1.67	SPBC1861.03		N-acetyltransferase complex; involved in protein amino acid acetylation; glucose repressible protein
TI4896S003773	46/G04	-1.67	SPAC19A8.12		hypothetical PSU1-like protein; pyrophosphatase; involved in deadenylation-dependent decapping; Nudix family hydrolase
TI4896S000009	19/C04	-1.67	SPCC757.05c		peptidase family M20; possibly involved in succinate metabolism; no apparent Sc ortholog
TI4896S003573	48/A11	-1.67	SPAC17H9.10c	ddb1	UV damage binding factor; XP-E family; involved in DNA replication checkpoint; no apparent Sc ortholog; non-essential; deletion results in elongated cells; deletion results in nuclear morphology defects; deletion sensitive to DNA damaging agents
TI4896S002884	17/A10	-1.66	SPAC12G12.06c		RNA 3'-terminal phosphate cyclase
TI4896S000572	30/B08	-1.66	SPCC162.09c	hmg1	3-hydroxy-3-methylglutaryl-coA reductase
TI4896S001813	38/C01	-1.66	SPBC16H5.12c		calcineurin-like phosphoesterase (Pfam); metallophosphatase (Pfam); no apparent orthologs
TI4896S002333	32/F07	-1.66	SPBC1718.07c	zfs1	zinc finger protein; zf-CCCH type; mating pheromone recognition pathway; non-essential; required to prevent septation if mitotic progression is inhibited
TI4896S000933	29/A09	-1.65	SPBC1683.04		beta-glucosidase activity; glycosyl hydrolase family 3; no apparent Sc ortholog
TI4896S003282	09/A05	-1.65	SPAC6F12.03c		SNARE; 1 t-SNARE coiled-coil homology domain; involved in versicle-mediated protein transport between the Golgi and the vacuole; no apparent S. cerevisiae ortholog
TI4896S003976	25/B09	-1.65	SPAC2E1P3.02c		ammonium transporter
TI4896S003835	13/A05	-1.64	SPAC823.15	ppa1	minor serine/threonine protein phosphatase pp2a-1 catalytic subunit; essential; required for cell cycle control
TI4896S004371	34/H03	-1.64	SPAC323.07c		MatE family transporter; unknown specificity; similar to Sp SPCC4B3.13 and SPAC11D3.06
TI4896S004750	33/A11	-1.64	SPAC4F10.11	spn1	septin; non-essential; involved in cytokinesis; involved in septation; involved in cell separation
TI4896S003907	25/A04	-1.64	SPAC1805.03c		conserved hypothetical; eukaryotic conserved protein
TI4896S004062	30/H03	-1.64	SPAC688.10	rev1	DNA polymerase zeta (catalytic subunit); involved in DNA repair, error-prone translesion synthesis
TI4896S000864	25/H04	-1.63	SPCC965.11c		amino acid transporter
TI4896S004465	27/D11	-1.63	SPAC25B8.11		involved in transcriptional regulation; zinc finger protein; possible activator for allantoin, 4-aminobutyric acid (GABA), and urea catabolic genes
TI4896S002278	32/B03	-1.62	SPBC11C11.08	srp1	RNA-binding protein; involved in mRNA splicing; no apparent Sc ortholog; rrm RNA recognition motif
TI4896S002385	23/B06	-1.62	SPBC16D10.10		tRNA specific adenosine deaminase activity; involved in tRNA modification
TI4896S002131	02/G07	-1.61	SPBC15D4.12c		hypothetical protein; sequence orphan
TI4896S002230	27/F01	-1.61	SPBC25H2.16c		VHS domain; GAT domain; involved in intracellular protein transport; adaptin C-terminal domain; similar to S. pombe SPAC1F3.05
TI4896S004863	26/F07	-1.61	SPAC29A4.16		serine/threonine protein kinase
TI4896S004914	12/B12	-1.61	SPAC14C4.12c		hypothetical protein
TI4896S004253	47/B10	-1.61	SPAC17G6.12	pcu1	cullin family; SCF ubiquitin ligase complex; covalent modification of cullin-1 by the NEDD8 system plays an essential role in the function of SCF
TI4896S001500	50/G05	-1.61	SPBC11B10.05c	pi006; SPACTOKYO_453.30c	random septum position protein Rsp1; DNAJ domain protein; similar to S. pombe SPBC1773.09C; no apparent orthologs; non-essential
TI4896S004216	10/D08	-1.60	SPAC16E8.10c		mitochondrial ribosomal protein S7
TI4896S001744	27/G09	-1.60	SPBC23G7.08c	rga7	GTPase activator; RhoGAP domain; actin cortical patch component
TI4896S001054	21/E07	-1.60	SPBC428.03c	pho4	thiamine-repressible acid phosphatase; non-essential; similar to Sp SPBC21H7.03C and PHO1
TI4896S002902	28/H10	-1.60	SPAC630.14c	tup1; tup12	eneral transcriptional repressor; transcriptional repressor functioning redundantly with Tup11p; WD repeat protein; histone binding
TI4896S002593	34/D01	-1.60	SPBC56F2.04		similar to human DRIM, a protein differentially produced in metastatic and nonmetastatic human breast carcinoma cells
TI4896S002340	33/B10	-1.60	SPBC1105.04c	abp1; cbp1	ARS binding protein; binds to centromeric DNA sequences; involved in chromosome segregation (mitotic) (required); involved in chromosome segregation (meiotic); CENP-B homolog; no apparent Sc ortholog; CENP-B box; C-terminal dimerization domain; disruption of CENP-B homologs causes a decrease in heterochromatin-specific modifications of histone H3; Sp CENP-B homologs are functionally redundant at …
TI4896S005002	24/E10	-1.60	SPAC922.05c		similar to A. thaliana T10F20.2; no apparent Sc ortholog
TI4896S001807	37/D10	-1.59	SPBC21H7.04		DEAD/DEAH box helicase; ATP-dependent; RNA helicase
TI4896S003021	23/C06	-1.59	SPAC22F3.12c	rgs1	regulator of G-protein signalling; regulates pheromone response; involved in mating (required)
TI4896S000403	43/D10	-1.59	SPCC1259.15c	ubc11; ubcp4; ubcdp	ubiquitin conjugating enzyme; E2-C; involved in mitotic transition (required); involved in the protein ubiquitination of Cdc13p; involved in the initiation of ubiquitination
TI4896S001669	07/F06	-1.59	SPBC16E9.12c	pab2	poly(A)-binding protein; involved in polyadenylation; RRM RNA recognition motif
TI4896S001200	21/C08	-1.59	SPBC530.13		cyclin homolog
TI4896S004098	28/E10	-1.58	SPAC6G10.07		nuclear cap-binding complex
TI4896S000874	47/E09	-1.58	SPCC1494.05c	ubp12	ubiquitin C-terminal hydrolase activity; involved in protein deubiquitination; involved in proteolysis (regulation) (supression); similar to Sp SPCC16A11.12c
TI4896S003473	27/G12	-1.58	SPAC17A5.12		DNAJ domain protein; involved in protein deubiquitination (implicated); ubiquitin-binding protein
TI4896S001168	33/B09	-1.58	SPBC119.13c	prp31	involved in mRNA splicing; links splicing and meiosis; essential
TI4896S002327	33/G07	-1.57	SPBC2G2.18	pop1; SPBC1718.01	F-box protein; WD repeat protein; involved in proteolysis and peptidolysis; forms hetero-and homo-complexes together with cullin-1 in SCF (Skp1-Cullin-1-F-box) ubiquitin ligase; complexed with Cdc18p; involved in the ubiquitin mediated degradation of Cdc18p; involved in the ubiquitin mediated degradation of Cdc1p; involved in the ubiquitin mediated degradation of Rum1p
TI4896S003885	41/F10	-1.57	SPAPB2B4.06		conserved hypothetical; hypothetical protein; possibly fungal specific
TI4896S004850	30/E10	-1.57	SPAC1006.06	rgf2	GDP-GTP exchange protein for Rho1p; pleckstrin homology domain; CNH domain; non-essential; overexpression causes defects in cell separation
TI4896S000840	37/C09	-1.57	SPCC1919.15	SPCC790.01	zinc finger protein; zf-C3HC4 type (RING finger); ubiquitin ligase (E3); involved in ubiquitination; involved in histone H2B monoubiquitination; similar to Sp SPCC970.10C
TI4896S003703	24/D08	-1.57	SPAC13G7.08c	crb3	WD repeat protein; DNA damage and replication checkpoint control protein; essential
TI4896S002703	33/G02	-1.57	SPBC1539.09c	trp1	anthranilate synthase component II; includes, glutamineamidotransferase, indole-3-glycerol phophate synthase, N-(5'-phosphoribosyl) anthranilate isomerase
TI4896S003470	13/A08	-1.56	SPAC17A5.09c		low similarity to human protein phosphatase inhibitor 2 and S. cerevisiae GLC8-Modulator of protein; serine/threonine phosphatase-involved in control of vacuole fusion-by multiple alignment; conserved WDE*N.*MK**EP*TP[FY]
TI4896S002346	48/F07	-1.56	SPBC1105.10		involved in regulation of (H+)-ATPase in vacuolar membrane
TI4896S003498	06/A05	-1.56	SPAC1002.17c		uracil phosphoribosyltransferase activity
TI4896S001993	37/C01	-1.56	SPBC4F6.14		RNA-binding protein; ribonucleoprotein; rrm RNA recognition motif
TI4896S004996	22/A09	-1.55	SPAC1039.08		probable serine acetyltransferase; no Sc ortholog
TI4896S002632	10/C07	-1.55	SPBC16G5.03		zinc finger protein; zf-C3HC4 type (RING finger); ubiquitin ligase (E3); no apparent orthologs
TI4896S002554	30/E02	-1.55	SPBC3B9.16c		nucleoporin; nuclear pore complex
TI4896S002998	47/H08	-1.55	SPAC1F3.03		WD repeat protein; involved in exocytosis; Sc sro7/sro77 function downstream of the Rho3p GTPase
TI4896S003705	22/H12	-1.55	SPAC13G7.10		Myb family; DNA binding protein
TI4896S001368	05/F08	-1.55	SPBC725.13c		GINS complex; involved in DNA repair; eukaryotic conserved protein
TI4896S004869	35/A02	-1.54	SPAC29A4.10		upstream activation factor complex; RNA polymerase I transcription factor; Myb family; DNA-binding protein
TI4896S004387	46/B09	-1.54	SPAC2F3.15		putative cell division protein kinase; serine/threonine protein kinase
TI4896S004531	25/C05	-1.54	SPAC27F1.08		Nramp manganese transporter
TI4896S003935	17/B12	-1.54	SPAC3F10.10c	map3	pheromone M-factor receptor; involved in meiosis (initiation); G-protein coupled receptor
TI4896S004805	32/E08	-1.53	SPAC1952.07	rad1	involved in DNA repair, DNA damage checkpoint, DNA replication checkpoint, cell cycle checkpoint
TI4896S004633	04/D05	-1.53	SPAC12B10.06c		widely conserved protein DUF339
TI4896S002697	32/H10	-1.53	SPBC1539.03c	argx	argininosuccinate lyase (putative); involved in arginine metabolism; arginine biosynthesis pathway (final step)
TI4896S000450	30/E12	-1.53	SPCC645.07	rgf1	non-essential; RhoGEF; pleckstrin homology domain; similar to Sp SPCC645.06c and SPAC1006.06
TI4896S000983	23/E11	-1.53	SPBC800.09		involved in G2/M phase checkpoint control (required)
TI4896S002458	37/H07	-1.53	SPBC31F10.16		ChAPs family protein; conserved fungal protein; involved in cell wall organization and biogenesis (maintenance)
TI4896S002614	19/B06	-1.53	SPBC14F5.08	med7	RNA polymerase II holoenzyme component; mediator complex subunit; essential; involved in regulating RNA polymerase II activity
TI4896S000235	38/B09	-1.53	SPCC5E4.03c	taf72	transcription initiation factor TFIID subunit; TAF(II) complex (TBP-associated protein complex); SAGA complex; involved in establishment and/or maintenance of chromatin architecture; involved in transcriptional activation; essential; overexpression suppresses the anaphase blocking mutation cut9; possible role of WD repeat-containing TAFs in the expression of genes involved in progression through …
TI4896S004260	15/G10	-1.53	SPAC1142.02c	SPAC17G6.19c	conserved hypothetical; conserved protein; TPR repeat protein
TI4896S004503	24/D07	-1.53	SPAC2C4.06c		NOL1/NOP2/sun family; methyltransferase
TI4896S001068	26/E06	-1.53	SPBC428.17c		hypothetical serine-rich protein; sequence orphan; non-essential
TI4896S003150	45/F11	-1.53	SPAC821.04c	cid13	poly(A) polymerase; regulates ribonucleotide reductase mRNA; cid1-related; caffeine induced death protein; nucleotidyltransferase; non-essential; no apparent Sc ortholog
TI4896S000698	20/A01	-1.53	SPCC1223.12c	meu10	involved in cell wall biosynthesis; meiotic expression upregulated; involved in spore wall assembly (required); similar to Sp SPAC1705.03c; GPI anchored protein (pers. comm. Birgit Eisenhaber)
TI4896S000605	10/A01	-1.52	SPCC663.05c		histone chaperone; replication-coupling assembly factor (RCAF) component; anti-silencing protein
TI4896S001787	32/F03	-1.52	SPBC14C8.06	sop2	WD repeat protein; essential; ARP2/3 actin-organizing complex; involved in cytokinesis, septation, actin cortical patch assembly, actin cortical patch distribution; interacts physically with Arp3p; involved in regulation of profilin function
TI4896S003251	05/H12	-1.51	SPAC10F6.07c		hypothetical protein; sequence orphan
TI4896S001000	45/H01	-1.51	SPBC1773.12		transcriptional regulator; zinc finger protein; zf-fungal Zn(2)-Cys(6) binuclear cluster domain
TI4896S000551	22/B01	-1.51	SPCC584.09	spn6; SPCC188.12	septin; sporulation specific protein; GTP_cdc domain protein
TI4896S000345	22/H07	-1.51	SPCC24B10.08c		transcriptional adaptor; histone acetyltransferase complex; Myb family; zinc finger protein; zf-ZZ type
TI4896S002047	18/F01	-1.51	SPBC19C7.12c		alpha-1,2-mannosyltransferase; glycosyl transferase family 15; similar to S. cerevisiae YOR099W and YKR061W and YJL139C and YDR483W and YBR205W and YBR199W and YPL053C; conserved fungal protein
TI4896S002444	04/E10	-1.51	SPBC31F10.02		thioesterase superfamily protein; human homolog is a novel candidate oncogene MCT-1 involved in cell cycle progression and; has multiple copies in T-cell malignancies; potential destruction box (D-box); non-essential
TI4896S004402	18/E06	-1.50	SPAC27E2.07		glycosyltransferase; involved in cell wall biosynthesis; deletion mutant galactomannans deficient for pyruvylated galactose-beta-1,3-galactose-alpha-1,2-pyruvylgalactose (PvGal) (pers. comm. Robert Trimble); no apparent orthologs
TI4896S001330	31/G07	-1.50	SPBC409.05	psh1; skp1; sph1	SCF ubiquitin ligase complex; complexes with Pop1p and Pop2p; essential; involved in cytokinesis and cell separation; skp1 family
TI4896S000253	12/B06	-1.50	SPCC16C4.10		glucosamine-6-phosphate isomerase; 6-phosphogluconolactonase activity
TI4896S004517	14/E02	-1.50	SPAC25G10.03	zip1	transcription factor; bZIP (basic leucine zipper) transcription factor family; overexpression suppresses Atf1 deletants
TI4896S004394	22/D10	-1.50	SPAC11G7.06c	B8647-2	Sp specific families; Pfam-B_8647 domain
TI4896S003355	24/A03	-1.49	SPAC5D6.07c		hypothetical protein; PXA domain; involved in intracellular signaling cascade (predicted); no ortholog
TI4896S002274	11/C08	-1.49	SPBC11C11.05		involved in cell wall biosynthesis
TI4896S002682	16/B02	-1.48	SPBC16C6.04		sequence orphan; hypothetical protein
TI4896S004524	05/E09	-1.48	SPAC27F1.02c	cdc8; fus4	tropomyosin; actin-binding protein; F-actin contractile ring component; essential; involved in contractile ring assembly (required); involved in cytokinesis (required); involved in actin assembly and function; involved in conjugation; involved conjugation with cellular fusion (required)
TI4896S000851	10/G04	-1.48	SPCC1840.09		hypothetical protein
TI4896S004311	39/D10	-1.48	SPAP4C9.01c	rad50; SPAC1556.01c	putative DNA repair protein, Rad50 homolog involved in DNA repair; SMC-like protein; involved in meiotic recombination; nvolved in DNA repair of lesion at the mating-type locus; nvolved in processing of DNA breaks; interacts with the cohesin complex during S phase to assist repair; stimulates sister chromatid recombination; links cohesion with repair; functions in the same pathway for the repair …
TI4896S001295	37/C06	-1.48	SPBC1734.03	SPBC337.19	dihydropteroate synthase; 2-amino-4-hydroxy-6-hydroxymethyldihydropteridine diphosphokinase; 7, 8-dihydro-6-hydroxymethylpterin-pyrophosphokinase; HPPK; dihydroneopterin aldolase; trifunctional enzyme; involved in folate biosynthesis (1st step) (2nd step)
TI4896S004822	04/B08	-1.48	SPAC890.08	rpl31	60S ribosomal protein L31
TI4896S001145	35/C12	-1.47	SPBC947.05c		ferric reductase transmembrane component; similar to Sp frp1 (paralog)
TI4896S001735	21/H10	-1.47	SPBC18E5.10		putative respiratory chain NADH dehydrogenase complex subunit F; no apparent Sc ortholog
TI4896S001858	23/A08	-1.47	SPBC19G7.14c		hypothetical protein with coiled-coil region; sequence orphan
TI4896S000376	22/E03	-1.47	SPCC1795.02c	SPCC895.01	CaCA proton/calcium exchanger
TI4896S002866	11/D11	-1.47	SPAC18B11.09c		acetyltransferase
TI4896S004180	49/H03	-1.47	SPAC3H5.06c	pol1; swi7; polA	DNA polymerase alpha (catalytic subunit); involved in DNA replication (initiation); replication initiation complex component; essential; involved in S/M checkpoint (required); involved in mating-type switching (required); involved in transcriptional silencing; involved in DNA repair; involved in telomere maintenance
TI4896S001162	48/H02	-1.47	SPBC119.07		serine/threonine protein kinase; EF hand motif; HEAT repeat
TI4896S002925	34/E04	-1.46	SPAC13C5.05c		N-acetylglucosamine-phosphate mutase (putative)
TI4896S001772	22/E11	-1.46	SPBC17G9.05	cyp6	cyclophilin; peptidyl-prolyl cis-trans isomerase; CRIP family; P. tetraurelia ortholog is involved in cell morphogenesis; no apparent Sc ortholog; RNA-binding protein; rrm RNA recognition motif
TI4896S001827	27/D06	-1.46	SPBC12D12.03	cct1	chaperonin-containing T-complex; chaperone; involved in protein folding
TI4896S002923	35/G11	-1.46	SPAC13C5.03	tht1	nuclear fusion protein; required for the fusion of nuclear; envelopes during karyogamy
TI4896S002508	38/E04	-1.45	SPBC1604.12		hypothetical protein; sequence orphan
TI4896S004568	20/E11	-1.45	SPAC16.05c		zinc finger protein; zf-C2H2 type (2)
TI4896S003599	20/E10	-1.45	SPAC3C7.05c		glycosyl hydrolase family 76; alpha-1,6-mannanase; similar to Sp SPCC970.02
TI4896S003298	28/H11	-1.45	SPAC19E9.02	fin1	serine/threonine protein kinase; NIMA-related kinase; involved in chromatin condensation (promotion); involved in spindle formation (regulation); involved in cytokinesis (required); involved in septation (required); expression peaks at M-G1 phase; regulated by PBF transcription complex; involved in the asymmetry of SIN inactivation non-essential
TI4896S000295	04/B10	-1.44	SPCC1393.03	rps1501; rps15-1	40S ribosomal protein S15
TI4896S002021	02/A06	-1.44	SPBC685.08		hypothetical protein; sequence orphan
TI4896S000872	23/H04	-1.44	SPCC1494.03		hypothetical protein; sequence orphan
TI4896S002888	09/G01	-1.44	SPAC630.01c	SPAC12G12.02	hypothetical protein
TI4896S000291	23/E03	-1.44	SPCC1020.03		CDF metal cation transporter; involved in mitochondrial iron accumulation
TI4896S000518	29/B08	-1.44	SPCC622.10c		sequence orphan; hypothetical protein
TI4896S003461	29/F12	-1.44	SPAC17A5.01		peroxin-6; AAA family ATPase; involved in peroxisome biogenesis
TI4896S001921	22/F08	-1.44	SPBC365.14c		UDP glucose NAD dependant epimerase/dehydratase
TI4896S001803	30/G06	-1.43	SPBC15C4.05		ATP-dependent RNA helicase; DEAD/DEAH box helicase; no apparent Sc ortholog
TI4896S001964	47/B06	-1.43	SPBC6B1.07	zer1; prp1	TPR repeat protein; involved in mRNA splicing (IGI); involved in G0 transition; involved in cell cycle progression (implicated); involved in poly(A)+ RNA nuclear export (implicated); does not functionally complement Sc PRP6
TI4896S000657	36/A01	-1.42	SPCC1442.02	SPCC1450.18	hypothetical protein; sequence orphan
TI4896S002356	37/D02	-1.42	SPBC887.02		ClC chloride channel
TI4896S002323	25/F12	-1.42	SPBC2G2.14		sequence orphan; hypothetical protein
TI4896S002893	09/D09	-1.42	SPAC630.06c		hypothetical protein; sequence orphan
TI4896S000511	42/A11	-1.42	SPCC622.03c		Sp specific families; hypothetical protein; possibly Sp specific; similar to Sp SPCC622.06c; tandem duplication
TI4896S001375	16/A07	-1.42	SPBC651.02		carbon-nitrogen hydrolase family
TI4896S001303	19/E03	-1.42	SPBC1734.11		mitochondrial chaperone regulator; DNAJ domain protein; DnaJ C terminal region; DnaJ central domain
TI4896S003374	43/C04	-1.42	SPAC167.04		conserved hypothetical; conserved hypothetical protein; possibly fungal specific
TI4896S002015	25/C04	-1.41	SPBC685.02	SPBC685.02	conserved hypothetical; conserved protein; no apparent Sc ortholog
TI4896S003546	36/A04	-1.41	SPAC3H1.11		transcriptional regulator; involved in transcriptional; regulation; zinc finger protein; zf-C2H2 type
TI4896S003728	36/F09	-1.40	SPAC17G8.12		hypothetical protein; sequence orphan
TI4896S004899	34/D06	-1.39	SPAC19D5.04		HECT domain; ubiquitin-protein ligase (E3)
TI4896S002553	30/D02	-1.39	SPBC3B9.15c		WD repeat protein; 5 predicted transmembrane helices; predicted N-terminal signal sequence; sterol sensing domain; no apparent S. cerevisiae ortholog
TI4896S002910	26/A06	-1.39	SPAC31A2.06		sequence orphan; hypothetical protein
TI4896S004957	45/H08	-1.39	SPAC4D7.07c		sequence orphan; hypothetical protein
TI4896S000382	28/G03	-1.38	SPCC895.07	alp14	Mad2-dependent spindle checkpoint component; Required for bipolar spindle formation and proper chromosome segregation; has a role in connecting the kinetochores and the plus end of pole to chromosome microtubules; also required for the activation of the spindle checkpoint pathway; MAP215/Dis1 family; HEAT repeat; no apparent S. cerevisiae ortholog
TI4896S000537	35/F03	-1.38	SPCC11E10.05c		nucleoside diphosphatase; similar to S. cerevisiae YER005W; 1 predicted transmembrane helix; predicted N-terminal signal sequence; non-essential; double mutant gda1delta/ynd1delta lethal
TI4896S002503	37/A03	-1.38	SPBC1604.17c		hypothetical protein; sequence orphan
TI4896S003837	34/F12	-1.37	SPAC7D4.14c		sequence orphan; hypothetical protein; serine/proline-rich protein
TI4896S004283	20/H11	-1.37	SPAC15A10.02		putative transcription initiation factor TFIID subunit; putative SAGA complex, possibly involved in chromatin architecture
TI4896S002423	27/E05	-1.37	SPBC19F5.05c	SPBC25D12.01c	involved in ribosome biogenesis and assembly; pescadillo-family; BRCT domain
TI4896S002402	23/D03	-1.37	SPBP8B7.15c		zinc finger protein; zf-CCHC type (zinc knuckle)
TI4896S001463	32/C07	-1.37	SPBC17A3.06	pi040	protein tyrosine phosphatase; involved in meiosis, sporulation
TI4896S002303	42/E06	-1.36	SPBC4B4.06		hypothetical protein; conserved protein; required for normal mating efficiency in yeast???
TI4896S000546	51/E09	-1.36	SPCC188.07		HEAT repeat; coiled-coil; no apparent orthologs
TI4896S001452	32/E10	-1.36	SPBC8D2.15		lipoic acid synthetase
TI4896S002146	32/A12	-1.36	SPBC30D10.18c	rpl102; rpl1-2; rpl10a-2	60S ribosomal protein L10
TI4896S002511	11/D02	-1.36	SPBC1604.09c		exonuclease
TI4896S002489	30/D01	-1.36	SPBC23E6.09	ssn6	TPR repeat protein; general repressor of RNA polymerase II transcription
TI4896S004268	24/D06	-1.36	SPAC8C9.03	cgs1; rak1	cAMP-dependent protein kinase; negative regulator of meiosis; mutant (cgs1-1) displays cAPK activity unregulated by cyclic AMP (cAMP); (old-> cAMP-dependent protein kinase regulatory chain)
TI4896S002803	02/H10	-1.36	SPAC11D3.16c		hypothetical protein; sequence orphan
TI4896S004069	31/E06	-1.35	SPAC3G9.03	rpl2301; rpl23-1; rpl23	60S ribosomal protein L23
TI4896S003727	16/E03	-1.35	SPAC17G8.11c		mannosyltransferase; involved in the mannosylation of sphingolipids; similar to Sp SPCC4F11.04c (paralog)
TI4896S001565	40/E07	-1.34	SPBC19C2.05	ran1; pat1	serine/threonine protein kinase; involved in conjugation (regulation) (negative); involved in meiosis (regulation) (negative); involved in protein amino acid phosphorylation (of Mei2p)
TI4896S001124	37/H02	-1.34	SPBC839.10		hypothetical protein; RNA recognition motif; PWI domain
TI4896S002383	47/B05	-1.34	SPBC16D10.08c		AAA family ATPase; chaperonin ATPase activity; involved in protein folding
TI4896S000210	47/B11	-1.34	SPCC1672.06c	asp1	acid phosphatase; important for the function of the cortical actin cytoskeleton; deletion mutant results in altered morphology and growth properties at elevated temperatures; deletion mutant results in polarized growth defects; non-essential; synthetically lethal with mutations in Arp2/3 complex components
TI4896S002574	32/D11	-1.34	SPBC1347.02	fkbp39	peptidyl-prolyl cis-trans isomerase (FKBP-type); similar to Sp SPAC27F1.06C (paralog)
TI4896S004252	26/F06	-1.34	SPAC17G6.11c		beta-glucan synthesis-associated protein
TI4896S003296	28/A11	-1.33	SPAC6F12.17		HAT repeat protein (SMART); involved in polyadenylation; involved in 3' end maturation
TI4896S001571	21/B01	-1.33	SPBC19C2.11c		hypothetical protein; possibly fungal specific
TI4896S002680	34/D07	-1.33	SPBC16C6.02c		involved in intracellular protein transport
TI4896S000653	36/G03	-1.33	SPCC1450.14c		involved in protein disulfide bond formation
TI4896S000846	24/A08	-1.33	SPCC1840.04		metacaspase-like protein; cysteine protease
TI4896S000490	38/A07	-1.33	SPCC338.13		Golgi transport complex; involved in intracellular protein transport; PPR domains (inferred from context); involved in secretory pathway; involved in ER to Golgi transport; conserved eukaryotic protein
TI4896S001980	02/D05	-1.33	SPBC4F6.01	smf1; SPBC3E7.14	small nuclear ribonucleoprotein with Sm domain; complexed with Cdc5p
TI4896S002485	21/H11	-1.33	SPBC23E6.05		metallopeptidase; peptidase family M24; involved in ribosome biogenesis (predicted)
TI4896S004992	24/G02	-1.32	SPAC1039.04		membrane transporter; unknown specificity; similar to Sp SPAC11D3.18C and SPAC1683.12 and SPAC1002.16C
TI4896S003444	21/G04	-1.32	SPAC664.03		involved in the regulation of transcription elongation; RNA polymerase II associated Paf1 complex
TI4896S000467	36/G11	-1.32	SPCC1322.05c		leukotriene A-4 hydrolase
TI4896S003924	10/G12	-1.32	SPAC1B2.04	cox6	cytochrome c oxidase (subunit VI)
TI4896S002940	23/D11	-1.31	SPAC24H6.04	hxk1	hexokinase 1
TI4896S002184	20/G08	-1.31	SPBC405.02c	SPBC4C3.01	hypothetical protein; serine/proline rich protein; sequence orphan
TI4896S004236	10/D09	-1.31	SPAC17A2.08c		hypothetical protein; sequence orphan
TI4896S003796	23/F07	-1.31	SPAC23H3.13c	gpa2; git8	guanine nucleotide-binding protein (alpha-2 subunit); involved in monitoring of nutrition, regulation of glucose repression, and sporulation
TI4896S003445	42/C08	-1.31	SPAC664.04c	rps1602; rps16; rps16-2	40S ribosomal protein S16
TI4896S000626	24/G09	-1.31	SPCC417.10		membrane transporter; unknown specificity; allantoate permease family; similar to Sp SPCC757.13 and SPBC1773.15
TI4896S004395	26/A07	-1.31	SPAC27E2.01		alpha-amylase; no apparent Sc ortholog
TI4896S002264	35/B04	-1.31	SPBC17D1.02		involved in peptidyl-diphthamide biosynthesis from peptidyl-histidine
TI4896S003638	18/D05	-1.30	SPAC23C11.14	zhf1; zhf	CDF metal cation transporter; involved in metal homeostasis; involved in zinc homeostasis; involved in cadmium homeostasis (independent of the phytochelatin detoxification pathway); involved in cobalt homeostasis; histidine rich cytoplasmic loop
TI4896S003120	46/D03	-1.30	SPAC1687.10		hypothetical protein; sequence orphan; predicted coiled-coil
TI4896S001523	35/C08	-1.30	SPBC83.16c		conserved protein
TI4896S003876	04/C05	-1.30	SPAC644.15	rpp1-1; rpa1	60S acidic ribosomal protein p1-alpha
TI4896S000763	29/G07	-1.30	SPCC1739.14	npp106; SPCC1739.14	nuclear pore complex; involved in nuclear import; involved in nuclear export; involved in nuclear export of the small ribosomal subunit; interacts physically with Rae1p (in mRNA export); similar to Sp SPCC1739.14 (1others)
TI4896S000750	36/A10	-1.30	SPCC1739.01	SPCC1906.05	zinc finger protein; zf-CCCH type; similar to Sp scp3 (paralog)
TI4896S002213	50/D12	-1.30	SPBC776.18c	pmh1	transcription initiation factor TFIIH subunit; Mcs complex (pers. comm R Fisher); zinc finger protein; zf-C3HC4 type (RING finger); ubiquitin ligase (E3)
TI4896S002357	28/C04	-1.30	SPBC887.03c		basic helix-loop-helix (bHLH); involved in DNA replication; NucleOlar Complex 2; involved in nuclear export of pre-ribosomes; interacts with MCM proteins; involved in the establishment and maintenance of pre-replication complexes; conserved eukaryotic protein
TI4896S000402	45/E12	-1.30	SPCC1259.12c		SPRY domain; CTLH domain; similar to human ranbpm; involved in vacuolar import and degradation
TI4896S002551	31/F01	-1.29	SPBC3B9.13c	rpa1-2; rpaP1-3; rpa3	60s acidic ribosomal protein; similar to Sp rpp101 and rpp103 (paralogs)
TI4896S000818	37/H06	-1.29	SPCC830.05c		histone acetyltransferase complex
TI4896S001049	36/B08	-1.29	SPBC582.08		alanine aminotransferase; non-essential
TI4896S000949	25/D12	-1.29	SPBC1198.07c		glycosylhydrolase; involved in cellular elongation; tandem duplication
TI4896S004819	11/C06	-1.29	SPAC890.05		conserved hypothetical eukaryotic protein; RNA-binding protein; G-patch domain
TI4896S002424	46/A05	-1.29	SPBC25D12.02c		hypothetical protein; sequence orphan; serine-rich protein
TI4896S002960	09/H04	-1.29	SPAC227.14		fungal conserved protein
TI4896S004204	17/A12	-1.29	SPAC328.08c		tubulin specific chaperone; TBCC family; CARP domain
TI4896S000236	31/B09	-1.28	SPCC5E4.04	cut1	separin; separase; involved in mitotic regulation and sister chromatid separation; promotes anaphase; loaded onto the metaphase spindle by Cut2p; peptidase family C50; shows proteolytic activity toward Rad21/Scc1
TI4896S002525	30/H06	-1.28	SPBC26H8.04c		conserved hypothetical; DEP domain
TI4896S004075	17/A04	-1.28	SPAC3G9.09c	tif211	translation initiation factor (2 alpha subunit)
TI4896S001088	17/B02	-1.28	SPBC1685.11		involved in DNA repair; shares conserved SGKTE[LM]LYHL (possibly ATP/GTP binding motif) with human and mouse XRCC2 protein; non-essential; no apparent Sc ortholog
TI4896S004325	17/G12	-1.28	SPAC1F12.05		conserved hypothetical; conserved fungal protein; similar to Sp SPBC18H10.20C (paralog)
TI4896S003865	13/F11	-1.28	SPAC644.04	pct1	RNA 5'-triphosphatase; involved in mRNA capping; essential; dimer
TI4896S003478	07/E07	-1.28	SPAC17A5.17	SPAC1610.01	hypothetical protein; sequence orphan
TI4896S000097	30/A08	-1.28	SPCC553.08c		translation elongation factor
TI4896S002870	20/E04	-1.27	SPAC18B11.05		eukaryotic conserved protein
TI4896S004789	25/E09	-1.27	SPAC1B3.09c		involved in ribosome biogenesis and assembly; involved in ribosome nucleus export; similar to Sp SPAC1142.04; predicted coiled-coil region
TI4896S001867	31/H10	-1.27	SPBC36B7.07	tlg1	SNARE; involved in secretory pathway; GPI anchored protein; 1 predicted transmembrane helix; Belongs to the syntaxin/epimorphin family; Contains 1 t-SNARE coiled-coil homology domain
TI4896S002922	22/H03	-1.27	SPAC13C5.02		hyphal growth protein 1; WW domain (2); FF domain
TI4896S002872	23/A07	-1.27	SPAC18B11.03c		hypothetical protein
TI4896S001922	38/C08	-1.26	SPBC365.15	alp4	spindle pole body component; gamma tubulin complex; involved in G1 progression (required); involved in spindle assembly checkpoint; involved in cytokinesis
TI4896S003734	24/F01	-1.26	SPAC22H10.05c		involved in cleavage and polyadenylation; CF IA component
TI4896S000815	22/F03	-1.26	SPCC830.02	wtf24; wtf10-pseudo	wtf element
TI4896S001004	36/D02	-1.26	SPBC1773.16c		transcriptional regulator; zinc finger protein; zf-fungal Zn(2)-Cys(6) binuclear cluster domain
TI4896S000590	19/D02	-1.26	SPCC777.07		glycosyl transferase family 15; similar to S. cerevisiae YOR099W and YKR061W and YJL139C and YDR483W and YBR205W and YBR199W and YPL053C; conserved fungal protein
TI4896S002990	48/B10	-1.26	SPAC3H8.05c		hypothetical protein; sequence orphan
TI4896S003633	29/F10	-1.26	SPAC23C11.09		alanine-tRNA ligase; involved in alanyl-tRNA aminoacylation; alanine-tRNA ligase activity
TI4896S002426	32/E12	-1.26	SPBC25D12.04	suc22	ribonucleotide reductase; ribonucleotide-diphosphate reductase (small subunit); involved in DNA replication (required)
TI4896S003015	28/H01	-1.26	SPAC1D4.10		eukaryotic conserved protein; lactamase B family
TI4896S002894	22/D09	-1.25	SPAC630.07c		hypothetical protein; sequence orphan
TI4896S005000	16/G11	-1.25	SPAC922.03		1-aminocyclopropane-1-carboxylate deaminase; no apparent Sc ortholog
TI4896S002880	20/B09	-1.25	SPAC12G12.10		hypothetical protein; WD repeat protein
TI4896S001554	10/G06	-1.25	SPBC21B10.08c		hypothetical protein; sequence orphan
TI4896S001412	33/A01	-1.25	SPBC27B12.05		conserved hypothetical protein; WD repeat protein
TI4896S001359	36/B05	-1.25	SPBC725.04		oxalyl-CoA decarboxylase
TI4896S003300	28/D01	-1.25	SPAC57A10.02	cdr2	serine/threonine protein kinase; invovled in G2/M progression (regulation); involved in cytokinesis (regulation); involved in mitotic start (regulation); involved in cell separation; nim1 family
TI4896S001108	05/B08	-1.25	SPBC354.11c		hypothetical protein; sequence orphan; non-essential
TI4896S004790	37/F03	-1.24	SPAC1B3.10c		SEL1 repeat protein; possibly extracellular by similarity to C. elegans sel-1; no apparent Sc ortholog
TI4896S001035	23/A11	-1.24	SPBC106.13		eukaryotic conserved hypothetical protein; LisH domain; CTLH domain
TI4896S003499	19/B08	-1.24	SPAC1002.18		conserved hypothetical; fungal conserved protein (Gaillardin et al); similar to N. crassa 3H10.120; no apparent Sc ortholog
TI4896S002625	28/G04	-1.24	SPBC342.02		glutaminyl-tRNA synthetase; involved in glutaminyl-tRNA aminoacylation; glutamine-tRNA ligase activity
TI4896S000786	17/E03	-1.24	SPCC126.01c	SPCC576.18c	conserved hypothetical; WD repeat protein
TI4896S004936	52/B06	-1.23	SPAC11E3.14		conserved protein
TI4896S004161	40/D06	-1.23	SPAC8E11.02c	rad24	involved in DNA repair; involved in DNA damage checkpoint; involved in G2/M phase transition; 14-3-3 protein; negatively regulates Byr2p by affecting its localization; overexpression results in cell cycle defects; similar to Sp rad25
TI4896S001640	10/G07	-1.23	SPBC3H7.10		hypothetical protein; conserved in human, D. melanogaster, mouse; no apparent Sc ortholog
TI4896S002091	20/G01	-1.23	SPBC2A9.03		conserved hypothetical; WD repeat protein
TI4896S002864	39/D04	-1.23	SPAC18B11.11	SPAC1F5.01	hypothetical 149.2 kD protein GTPase activating protein; similar to human tuberous sclereosis 2; similar to Sp SPAC630.13c; putative Rap_GAp domain (Pfam reduced threshold); no apparent Sc ortholog
TI4896S000580	08/H08	-1.23	SPCC162.01c		nucleic acid binding protein; similar to human RY-1; no apparent Sc ortholog
TI4896S000417	18/G04	-1.23	SPCC4B3.07		conserved hypothetical; Sc YOR051C purifies as part of the nuclear pore complex
TI4896S004282	27/G04	-1.23	SPAC15A10.01	SPAC8C9.18	ABC family; membrane transporter
TI4896S001988	36/G10	-1.23	SPBC4F6.09		membrane transporter; siderochrome-iron transporter activity; involved in iron-siderochrome transport; involved in iron homeostasis; similar to Sp SPCC61.01C and SPAC1F8.03c
TI4896S001537	23/G03	-1.23	SPBC28F2.01c	SPBC27.08c	sulfate adenylyltransferase; ATP sulfurylase; involved in methionine biosynthesis
TI4896S003433	46/A08	-1.23	SPAC824.01	SPAC343.19	phosphatidylinositol 4-kinase; human Wiskott-Aldridge syndrome protein interacting protein homolog; involved in the regulation of actin cytoskeletal organization
TI4896S003961	22/H01	-1.22	SPACUNK4.10		2-hydroxyacid dehydrogenase
TI4896S004675	15/G03	-1.22	SPAC144.18		nucleotide sugar transporter; involved in glycosylation
TI4896S001874	33/D08	-1.22	SPBC1921.03c	mex67	involved in mRNA export; interacts physically with Rae1p
TI4896S001415	34/B08	-1.22	SPBC27B12.08		conserved hypothetical; HEAT repeat (inferred from context)
TI4896S003050	24/H07	-1.22	SPAC22G7.09c		nucleoporin; nuclear pore complex; involved in nuclear export of the small ribosomal subunit
TI4896S000613	03/F11	-1.21	SPCC663.13c		hypothetical N acetyltransferase protein
TI4896S002405	34/G04	-1.21	SPBP8B7.18c		conserved hypothetical; TENA/THI domain; similar to Sp SPBP8B7.17C and SPCC18B5.05C (paralogs); tandem duplication in pB8B7
TI4896S000054	29/A01	-1.21	SPCC320.04c		eukaryotic conserved protein; Rho GTPase; involved in apoptosis; ATP/GTP binding; EF hand motifs; calcium binding protein
TI4896S001796	45/A07	-1.20	SPBC14C8.15		triglyceride lipase-cholesterol esterase; similar to Sp SPCC1672.09 and SPBC16A3.12C (paralogs)
TI4896S002790	04/A01	-1.20	SPAC11D3.02c		elaa family protein; putative acetyltransferase; no apparent Sc ortholog
TI4896S004061	17/G11	-1.20	SPAC688.09		mitochondrial carrier
TI4896S001148	27/F07	-1.20	SPBC947.02	apl2	AP-1 adaptor complex subunit; adaptin family; involved in vesicle-mediated transport
TI4896S001205	45/D06	-1.20	SPBC36.03c		unknown specificity; transporter; similar to Sp SPAC11D3.05 and SPCC794.04C and SPCC569.05C and SPBC530.15C and SPBC36.01C and SPBC36.02C and SPBC530.02 and SPBC947.06C; involved in amine/polyamine transport; tandem duplication
TI4896S001143	08/C03	-1.20	SPBC947.07		involved in ribosome biogenesis and assembly; surf-like
TI4896S003045	48/D12	-1.20	SPAC22G7.04	ubp13	WD repeat protein (SMART); ubiquitin C-terminal hydrolase activity; involved in polyadenylation; exonuclease domain
TI4896S001700	24/G03	-1.20	SPBP23A10.11c		serine-rich protein
TI4896S004733	30/F08	-1.20	SPAC20G4.02c	fus1	formin; involved in conjugation with cellular fusion, actin cytoskeletal organization; actin-binding protein; similar to Sp cdc12 and for3
TI4896S002957	22/B09	-1.20	SPAC227.11c		membrane-associated glycoprotein; involved in intracellular protein transport; involved in ER to golgi transport; involved in the transport of GPI-anchored proteins to the Golgi apparatus
TI4896S000528	26/F03	-1.20	SPCC622.20c	SPCC61.01c	membrane transporter; siderochrome-iron transporter activity; involved in iron-siderochrome transport; involved in iron homeostasis; similar to Sp SPBC4F6.09 and SPAC1F8.03c
TI4896S002665	07/F08	-1.20	SPBC16A3.04		conserved hypothetical protein
TI4896S001961	20/C06	-1.20	SPBC6B1.04	mde4	no apparent orthologs; involved in meiosis (implicated); involved in sporulation (implicated); Mei4p-dependent expression
TI4896S003761	05/E02	-1.20	SPAC6B12.13		hypothetical protein; Sc YFR003C may physically interact with Glc7p and Ppz1p; Sc YFR003C is null lethal
TI4896S002273	41/A08	-1.19	SPBC11C11.04c	alp1	tubulin-folding cofactor d
TI4896S003803	22/B11	-1.19	SPAC25H1.06		WD repeat protein; involved in chromatin assembly/disassembly; no apparent Sc ortholog
TI4896S004409	46/H03	-1.19	SPAC19G12.01c	cut20; lid1; SPAPJ698.04c	cyclosome/apc subunit; Cut20/Apc4 anaphase-promoting complex (APC); cyclosome; WD repeat protein (putative); involved in metaphase-anaphase transition (regulation)
TI4896S000630	27/C09	-1.19	SPCC191.02c	SPCC417.14c	acetyl-coenzyme A synthetase; AMP binding domain
TI4896S004010	30/B11	-1.19	SPAC31G5.15		phosphatidylserine decarboxylase; C2 domain
TI4896S004809	29/B03	-1.19	SPAC1952.11c	ure2	experimentally characterised; urease; no apparent Sc ortholog
TI4896S000292	30/F05	-1.19	SPCC1020.02	spc7	hypothetical protein
TI4896S000724	38/H05	-1.19	SPCC18.04	pof6	F-box protein; essential; involved in cytokinesis; involved in cell separation (required); involved in endocytic membrane traffic and recycling out of an early endosome
TI4896S004643	49/B01	-1.18	SPAC12B10.16c		hypothetical protein; no apparent Sc ortholog; conserved in bacteria
TI4896S001877	17/H09	-1.18	SPBC1921.06c		beta-1,3-galactosyltransferase; involved in cell wall biosynthesis; deletion mutant galactomannans deficient for pyruvylated galactose-beta-1,3-galactose-alpha-1,2-pyruvylgalactose (PvGal); predicted N-terminal signal sequence; no apparent orthologs
TI4896S004340	24/H01	-1.18	SPAC4H3.10c	pyk1	14-3-3 protein; involved in DNA repair; involved in DNA damage checkpoint; similar to Sp rad24; involved in cell wall organization and biogenesis (maintenance); involved in cytokinesis; mutant is hypersensitive to spindle poison N-3-chlorophenyl carbamate; negatively regulates Byr2p by affecting its localization; (0ld-> pyruvate kinase (EC 2.7.1.40))
TI4896S002149	25/B07	-1.18	SPBC30D10.15		nuclear assembly factor; involved in snoRNP biogenesis; complexed with Shq1p
TI4896S001690	33/H06	-1.18	SPBP23A10.01c	pmc1; SPBC1A4.10c	RNA polymerase II holoenzyme component; mediator complex subunit; involved in regulating RNA polymerase II activity
TI4896S000483	30/D03	-1.18	SPCC132.04c		glutamate dehydrogenase; involved in glutamate metabolism
TI4896S004480	47/G10	-1.18	SPAC694.06c	mrc1	involved in DNA replication checkpoint; involved in the activation of Cds1p during replication stress (required); involved in chromatin silencing; predicted coiled-coil; DEK-rich protein; similar to human Claspin
TI4896S001966	45/A11	-1.18	SPBC6B1.09c		FHA domain (phosphopeptide binding); low complexity region (C-terminal); similar to human NBS1; involved in DNA repair; involved in cell cycle checkpoint; BRCT domain
TI4896S001489	49/B08	-1.18	SPBC32H8.08c	pi016; SPACTOKYO_453.20	mannosyltransferase complex subunit predicted; glycosyl transferase family 15; conserved fungal protein; similar to S. cerevisiae YNL029C and YIL085C; similar to S. pombe SPBC1773.08C
TI4896S004824	12/B11	-1.18	SPAC22E12.02		conserved hypothetical; RNA-binding protein; rrm RNA recognition motif
TI4896S000601	09/H12	-1.18	SPCC663.02	wtf14; wtf15	wtf element
TI4896S002169	19/G08	-1.18	SPBC1778.07		conserved hypothetical; methyltransferase
TI4896S002608	26/B03	-1.17	SPBC14F5.02		sequence orphan; hypothetical protein
TI4896S002841	30/G07	-1.17	SPAC24B11.12c		P-type ATPase; aminophospholipid translocase
TI4896S002076	28/F01	-1.17	SPBC1703.02		chromatin remodeling complex; DNA binding activity; ARID DNA-binding domain
TI4896S003465	25/G12	-1.17	SPAC17A5.04c		zinc metallopeptidase; disintegrin/ADAM protease; GPI anchored protein (pers. comm. Birgit Eisenhaber); glycoprotein; non-essential; no apparent Sc ortholog
TI4896S003104	34/A03	-1.17	SPAC23G3.12c		PDZ domain protein; trypsin domain; serine protease; similar to Sp SPBC1685.05
TI4896S004821	36/B04	-1.17	SPAC890.07c		arginine N-methyltransferase activity; involved in regulation of RNA-nucleus export; involved in nuclear export
TI4896S002512	25/H09	-1.16	SPBC1604.08c	imp1	importin alpha subunit; armadillo repeat protein; similar to Sp cut15 (paralog); overexpression results in cell cycle defects
TI4896S001326	32/A06	-1.16	SPBC1709.18	tif452; SPBC409.01	translation initiation factor (eIF4E subunit); eIF4G-binding
TI4896S004974	38/G11	-1.16	SPAC3G6.11		DEAD box helicase
TI4896S000339	20/H09	-1.16	SPCC24B10.02c		NAD/NADH kinase; ATP dependent; involved in nicotinamide metabolism; similar to Sp SPAC3H5.11 and SPAC1B1.02C
TI4896S003086	29/H11	-1.15	SPAC2G11.14		transcription initiation factor TFIID subunit; zinc finger protein; zf-CCHC type (zinc knuckle)
TI4896S000297	30/C12	-1.15	SPCC1393.05		hypothetical protein; sequence orphan
TI4896S004939	44/C11	-1.15	SPAP8A3.03		ZIP zinc transporter domain
TI4896S004419	29/G12	-1.15	SPAC19G12.10c	cpy1; pcy1	carboxypeptidase Y; involved in vacuolar protein sorting
TI4896S001562	32/D02	-1.15	SPBC19C2.02	pmt1	DNA methyltransferase; no apparent Sc ortholog
TI4896S002398	24/A07	-1.15	SPBP8B7.11		RNA-binding protein; NTF2 domain; involved in nuclear cytoplasmic transport; rrm RNA recognition motif; Ras GTPase activating protein
TI4896S003578	04/G09	-1.15	SPAC17H9.16		mitochondrial outer membrane translocase complex; involved in mitochondrial outermembrane protein import; mitochondrial import receptor
TI4896S000988	23/B12	-1.15	SPBC800.13		Histone-fold/TFIID-TAF/NF-Y (Interpro); DNA-binding protein; involved in transcriptional regulation; no apparetn Sc ortholog
TI4896S001386	32/B04	-1.15	SPBC31A8.01c	cwl1; rtn1; SPBC651.13c	reticulon-like protein; overexpression results in cell lysis
TI4896S004852	32/F11	-1.15	SPAC1006.08	etd1	involved in septation (required); no apparent orthologs
TI4896S004241	24/G12	-1.15	SPAC17A2.13c	rad25; cps6	DNA damage checkpoint protein Rad25
TI4896S002931	38/F07	-1.14	SPAC24H6.13		eukaryotic conserved protein; Sc homolog RSN1 is involved in tunicamycin sensitivity; DUF221
TI4896S001280	22/G08	-1.14	SPBC337.04		serine/threonine protein kinase
TI4896S002431	21/G05	-1.14	SPBC13G1.02		mannose-1-phosphate guanyltransferase
TI4896S003908	48/D07	-1.14	SPAC1805.04		nuclear pore complex; involved in nuclear import; involved in nuclear export; involved in nuclear export of the small ribosomal subunit
TI4896S004401	25/H08	-1.14	SPAC27E2.06c		methionine-tRNA ligase; involved in methionyl-tRNA aminoacylation; methionine-tRNA ligase activity
TI4896S001583	32/F06	-1.14	SPBC2F12.08c	ceg1; pce1	mRNA guanylyltransferase; involved in mRNA capping
TI4896S003147	21/D10	-1.14	SPAC821.02c	csn3; SPAC222.16c	COP9/signalosome complex (subunit 3); no apparent Sc ortholog
TI4896S004654	44/E02	-1.14	SPAC30C2.06c		involved in mitochondrial genome maintenance; similar to D. melanogaster mst2; Sc YMR211W is null lethal
TI4896S000495	28/A07	-1.13	SPCC338.07c		N-acetyltransferase; involved in protein amino acid acetylation; TPR repeat protein
TI4896S000965	46/B02	-1.13	SPBC660.13c	rpa1; rad11; ssb1	replication factor-A protein 1; DNA replication factor A complex
TI4896S004870	08/C01	-1.13	SPAC29A4.09		conserved eukaryotic protein
TI4896S003334	28/B07	-1.13	SPAC3A12.15	vps53	involved in intracellular protein transport; involved in vacuolar sorting; GARP complex; involved in protein sorting in the late Golgi; involved in retrograde transport from the prevacuole; involved in docking at the trans-Golgi network; similar to S. cerevisiae YJL029C
TI4896S003597	40/C10	-1.13	SPAC3C7.03c	rhp55	H-h-H (helix-hairpin-helix) (inferred from context); putative divergent AAA family ATPase; involved in DNA repair; involved in meiotic recombination; involved in meiotic gene conversion (required); deletion mutant sensitive to MMS; deletion mutant sensitive to IR; deletion mutant sensitive to UV; deletion mutant results in nuclear morphology defects (frequent); deletion mutant results in elongate…
TI4896S001892	28/H09	-1.13	SPBC12C2.08		dynamin family; dynamin GTPase effector domain; involved in mitochondrial morphology; involved in mitochondrial localization; involved in mitochondrial fission
TI4896S003565	30/A02	-1.13	SPAC17H9.02		DEAD/DEAH box helicase; involved in mRNA export
TI4896S003108	31/H09	-1.13	SPAC22H12.04c	rps102; rps3a-2; rps1-2	40S ribosomal protein S3a.2/S1B
TI4896S003581	23/G01	-1.13	SPAC17H9.19c	cdt2	WD repeat protein; regulated by DSC1/MBF complex; involved in vegetative growth; involved in sporulation; non-essential; involved in DNA replication; functionally complemented by overexpression of suc22; deletion sensitive to HU; no apparent Sc ortholog
TI4896S004296	30/F12	-1.13	SPAC15E1.01	fat1; SPAC15A10.16	actin binding protein; involved in actin cytoskeletal organization
TI4896S002292	40/D11	-1.13	SPBC3B8.02	php5	CCAAT-box binding factor subunit; involved in growth on non-fermentable carbon sources (required); DNA-binding activity (required); histone fold; involved in the transcriptional activation (of cyc1) (required); histone-like transcription factor family
TI4896S002782	42/H09	-1.13	SPAC1F8.02c		exoglucanase I precursor glycoprotein; possibly Sp specific; GPI anchored protein (pers. comm. Birgit Eisenhaber); no apparent Sc ortholog
TI4896S002249	47/G01	-1.13	SPBC20F10.05		sequence orphan; hypothetical protein
TI4896S004378	10/F12	-1.13	SPAC2F3.05c		aldo/keto reductase; oxidoreductase; xylose reductase; arabinose reductase; similar to Sp SPAP32A8.02 (paralog)
TI4896S001077	19/A09	-1.12	SPBC902.06		MT organizer; coiled-coil region; non-essential; no apparent orthologs; Mto2 and the EMTOC are critical for anchoring the cytokinetic actin ring to the medial region of the cell, and for the proper coordination of mitosis with cytokinesis; Mto2 promotes the ability of Mto1 to recruit the gamma tubunlin complex to a subset of MTOCs away from the spindle pole body
TI4896S003959	47/D09	-1.12	SPACUNK4.12c		peptidase family M16; involved in pheromone response
TI4896S001294	40/E06	-1.12	SPBC1734.02c	cdc27; SPBC337.18c	DNA polymerase (delta subunit); involved in G2/M phase transition (required); interacts physically with Pcn1p; recruits PCNA to the Pol delta holoenzyme; interacts physically with Cdc1p; essential; involved in DNA replication (required); involved in telomere maintenance
TI4896S001676	36/F02	-1.12	SPBC1E8.02		proline-rich protein; ubiquitin family protein
TI4896S000679	18/B08	-1.12	SPCC285.10c		conserved hypothetical; hypothetical protein; SPRY domain
TI4896S004019	36/H02	-1.12	SPAC24C9.01	cut11; SPAC1786.03	spindle pole body docking protein; essential; 7 predicted transmembrane helices
TI4896S002108	32/B02	-1.12	SPBC2D10.10c	fib1; fib	fibrillarin; U3 snoRNP component; involved in rRNA processing and methylation; small nuclear ribonucleoprotein (snRNP); involved in rRNA processing
TI4896S004660	35/F09	-1.12	SPAC144.03	ade2; min10; min3	adenylosuccinate synthetase; involved in cadmium resistance (required); involved in purine biosynthesis
TI4896S001821	25/C03	-1.12	SPBC16H5.05c	cyp7; cwf27	cyclophilin; peptidyl-prolyl cis-trans isomerase; complexed with Cdc5p; involved in mRNA splicing; no apparent Sc ortholog
TI4896S004063	30/C09	-1.12	SPAC688.11		actin cortical patch component; ENTH domain protein; actin-binding protein; involved in actin cytoskeletal organization, cell polarity, endocytosis
TI4896S003010	19/C12	-1.12	SPAC1D4.05c		ER lumen protein retaining receptor activity; involved in protein-ER retention
TI4896S001862	32/D08	-1.12	SPBC36B7.02		conserved hypothetical protein; similarity to NIFD/NIFK/NIFE/NIFN family
TI4896S001542	31/H11	-1.12	SPBC28F2.06c	mdm12	involved in mitochondrial inheritance
TI4896S004837	02/E04	-1.11	SPAC22E12.15		very hypothetical protein
TI4896S001622	05/E12	-1.11	SPBC9B6.05c	lsm3	U6 snRNA-associated protein; involved in mRNA splicing
TI4896S003343	34/E01	-1.11	SPAC9.07c		GTP-binding protein; TGS domain; GTP1/OBG family
TI4896S001464	33/A07	-1.11	SPBC17A3.07	pgr1; pi039	glutathione reductase; essential; maintains high levels of glutathione in the cytosol
TI4896S001149	27/G03	-1.11	SPBC947.01		AAA family ATPase; involved in microtubule disassembly; similar to Sp SPAC328.04
TI4896S002198	29/D04	-1.11	SPBC776.04	sec2302; sec23-b	GTPase activator; involved in intracellular protein transport; COPII-coated vesicle component; similar to Sp SPCC31H12.07 (paralog)
TI4896S000451	38/G02	-1.11	SPCC645.08c		RNA-binding protein; tudor domain; p100 co-activator ortholog; TFIIE-interacting; no apparent Sc ortholog
TI4896S004217	25/D09	-1.11	SPAC16E8.11c		transcription factor TFIIH complex; general RNA polymerase II transcription factor activity; BSD domain (2)
TI4896S001605	18/G03	-1.11	SPBC18H10.06c		SET1 complex (TAP); involved in transcriptional silencing; involved in regulation of chromatin remodelling; WD repeat protein; similar to Sp SPAC824.04 (paralog)
TI4896S001739	09/H10	-1.11	SPBC23G7.16	ctr6	copper transporter; induced under copper limiting conditions; regulated by Cuf1p
TI4896S001320	22/G09	-1.10	SPBC1709.12		hypothetical protein; sequence orphan
TI4896S003934	18/F10	-1.10	SPAC3F10.09		1-(5-phosphoribosyl)-5-[(5-phosphoribosylamino)methylideneamino]imidazole-4-carboxamide isomerase activity; involved in histidine biosynthesis (4th step)
TI4896S002903	37/G01	-1.10	SPAC1751.01c	gti1	experimentally characterised; DeSpription required for gluconate-H+ symport; anion transport; similar to Sp pac2
TI4896S002695	42/E12	-1.10	SPBC1539.01c		hypothetical protein; sequence orphan
TI4896S002452	35/F08	-1.10	SPBC31F10.10c		zinc finger protein; zf-MYND type; involved in cell polarity (regulation)
TI4896S004359	28/A02	-1.10	SPAC926.04c	hsp90; swo1	chaperone; heat shock protein 90 homolog
TI4896S001511	04/D07	-1.10	SPBC83.04	apc15	anaphase-promoting complex (APC); no apparent orthologs
TI4896S002561	31/C05	-1.09	SPBC215.04	git11	G gamma subunit of the gpa2/git5/git11 heterotrimeric G protein; no apparent orthologs; glucose/cAMP pathway; related to Sc YJR086W but not functional ortholog
TI4896S004031	21/G01	-1.09	SPAC24C9.12c		serine hydroxymethyltransferase; involved in glycine metabolism; involved in serine metabolism; glycine hydroxymethyltransferase activity
TI4896S003637	12/C02	-1.09	SPAC23C11.13c		xanthine phosphoribosyltransferase; involved in purine nucleotide biosynthesis
TI4896S004681	17/G05	-1.09	SPAC1834.06c		mo25 family protein; essential; conserved eukaryotic protein
TI4896S001831	19/G11	-1.09	SPBC12D12.06		cyclin C homolog; RNA polymerase holoenzyme component (putative)
TI4896S000541	51/E01	-1.09	SPCC11E10.09c	SPCC188.01c	Sp specific families; alpha-amylase; no apparent Sc orthologs
TI4896S004363	17/C12	-1.09	SPAC926.08c		RNA-binding protein; Brix domain; involved in RNA processing; involved in ribosome biogenesis and assembly; eukaryotic conserved protein
TI4896S003754	01/A10	-1.09	SPAC6B12.06c		hypothetical protein
TI4896S004054	49/F09	-1.08	SPAC688.01	SPAC589.12	hypothetical protein; involved in sensitivity to certain drugs
TI4896S001992	38/A05	-1.08	SPBC4F6.13c		WD repeat protein; involved in ribosome biogenesis and assembly; involved in rRNA processing
TI4896S002176	17/F04	-1.08	SPBC4C3.08	B20341-2	acetylglucosaminyltransferase; galactosyltransferase family 8; predicted N-terminal signal sequence; tandem duplication; similar to S. pombe SPBC4C3.09 and SPAC5H120.02; similar to S. cerevisiae YOR320C
TI4896S004566	17/A08	-1.08	SPAC16.03c	ura2	dihydroorotase; involved in pyrimidine nucleotide biosynthesis; dihydroorotase activity
TI4896S004027	36/D03	-1.08	SPAC24C9.08		gly x carboxypeptidase activity; peptidase family M20
TI4896S000703	47/E05	-1.08	SPCC297.05		small GTP binding protein; DENN domain; no apparent Sc ortholog
TI4896S004815	27/A02	-1.08	SPAC890.01c	SPAC1952.17c	GTPase activating protein of Rab-like GTPase; possible Sp specific; closest to Sp SPBC530.01
TI4896S002936	07/F04	-1.07	SPAC24H6.08		sequence orphan; hypothetical protein
TI4896S000299	38/E08	-1.07	SPCC1393.07c		hypothetical protein; sequence orphan
TI4896S000616	26/F02	-1.07	SPCC1902.02	SPCC663.16c	conserved protein; putative ketopantoate reductase
TI4896S004735	17/A02	-1.07	SPAC20G4.04c	hus1	PCNA related protein; Hus1-Rad1-Rad9 checkpoint complex; involved in DNA replication checkpoint; involved in DNA damage checkpoint (required); involved in S/M checkpoint (required); sliding clamp and clamp-loading complex; interacts physically with Rad1p; interacts physically with Rad9p; interacts physically with Rad17p; phosphorylated in response to DNA damage
TI4896S000998	35/E02	-1.07	SPBC1773.10c		asparagine-tRNA ligase; involved in asparaginyl-tRNA aminoacylation; asparagine-tRNA ligase activity
TI4896S001119	31/G10	-1.07	SPBC839.05c	rps1701; rps17-1	40S ribosomal protein S17
TI4896S000651	47/E02	-1.07	SPCC1450.12		sorting nexin; involved in intracellular protein transport; PX domain; phosphoinositide binding
TI4896S000405	37/H10	-1.06	SPCC1259.14c	meu27; B8647-6	possibly Sp specific; Pfam_B_8647 domain; NLS; meiotic expression upregulated
TI4896S002259	34/A01	-1.06	SPBC17D11.05	tif32	translation initiation factor (eiF3 p110 subunit); PCI domain
TI4896S004137	45/B11	-1.06	SPAC2E1P5.05		putative U3 snoRNP associated; WD repeat protein
TI4896S002283	38/F05	-1.06	SPBC3B8.11		hypothetical protein; sequence orphan
TI4896S000594	34/D10	-1.06	SPCC777.11		sequence orphan; hypothetical protein
TI4896S001648	47/A05	-1.06	SPBC3H7.02		SulP sulfate transporter
TI4896S002044	33/D09	-1.05	SPBC19C7.09c	uve1; uvde	UV-endonuclease; involved in DNA repair; involved in nucleotide-excision repair; no apparent Sc ortholog
TI4896S001449	32/G10	-1.05	SPBC8D2.12c	pi053	conserved protein; involved in mitochondrial protein synthesis
TI4896S001304	35/G08	-1.05	SPBC1734.12c		involved in cell wall biosynthesis
TI4896S001824	29/E09	-1.05	SPBC16H5.02	pfk1	6-phosphofructokinase; overexpression results in cell cycle defects; involved in glycolysis; 6-phosphofructokinase activity; Sp appears to only have one isoform, most other yeasts have 2, is this in one of the gaps?
TI4896S003814	13/D08	-1.04	SPAC4A8.09c	cwf21	involved in mRNA splicing; spliceosome component; complexed with Cdc5p; RNA-binding protein (inferred from context); no apparent Sc ortholog
TI4896S004463	09/C07	-1.04	SPAC25B8.09		methyltransferase; similar to Sp SPAC25B8.10; tandem duplication
TI4896S004556	48/D02	-1.04	SPAC30.07c	uso1; SPAC29E6.03c	involved in intracellular protein transport; involved in ER to Golgi transport; armadillo repeat protein (inferred from context); predicted coiled-coil region
TI4896S003995	50/C03	-1.04	SPAC31G5.01	sap49; SPAPB1A11.05	RNA-binding protein; rrm RNA recognition motif; involved in mRNA splicing
TI4896S000426	28/E03	-1.04	SPCP25A2.03		vertebrate p84 (retinoblastoma binding) orthologue; involved in RNA processing; no apparent Sc ortholog
TI4896S000275	36/F11	-1.04	SPCC18B5.11c	cds1	serine/threonine protein kinase; non-essential; involved in DNA damage checkpoint; involved in DNA replication checkpoint; FHA domain (phosphopeptide binding)
TI4896S004969	25/F04	-1.04	SPAC3G6.06c	rad2; fen1	FEN-1 endonuclease; involved in Okazaki fragment processing; involved in DNA replication; involved in DNA repair; Uve1p dependent repair; XP-G family; deletion mutant hypersensitive to MMS; involved in telomere maintenance
TI4896S000940	45/A10	-1.03	SPBC1683.11c		isocitrate lyase
TI4896S003151	22/D08	-1.03	SPAC821.05		eIF3 p40 eIF/signalosome component; MOV34 domain; no apparent Sc ortholog
TI4896S000624	30/B04	-1.03	SPCC417.08		translation elongation factor 3
TI4896S000201	26/A09	-1.03	SPCC962.03c	cut15	alpha-importin/karyopherin; serine rich RNA polymerase I suppressor; involved in mitosis; involved in chromosome condensation (required); armadillo repeat protein; similar to Sp SPBC1604.08C
TI4896S003260	05/D01	-1.03	SPAC10F6.16		cAMP-regulated phosphoprotein/endosulfine conserved region; eukaryotic conserved protein
TI4896S000730	22/F02	-1.03	SPCC18.10		pyridoxine-pyridoxal-pyridoxamine kinase; similar to Sp SPAC6F6.11C (paralog)
TI4896S003918	21/A11	-1.03	SPAC1805.14		hypothetical protein; sequence orphan
TI4896S004230	11/G10	-1.02	SPAC17A2.02c		conserved hypothetical protein
TI4896S004854	31/F05	-1.02	SPAC1250.05	rpl3002; rpl30-2; rpl30	60S ribosomal protein L30
TI4896S002939	40/F12	-1.02	SPAC24H6.05	cdc25; sal2	M-phase inducer phosphatase; involved in G2/M phase transition; involved in cell cycle checkpoint; involved in DNA damage checkpoint; involved in DNA repair checkpoint; involved in the regulation of CDK activity; involved in control of mitosis
TI4896S004345	27/D12	-1.02	SPAC1071.01c	SPAC4H3.15c	involved in cleavage and polyadenylation
TI4896S001094	31/F07	-1.02	SPBC649.02	rps1902; rps19-2; rps19	40S ribosomal protein S19; similar to Sp rps1901
TI4896S003608	06/G10	-1.02	SPAC3C7.14c	obr1	flavodoxin; involved in brefeldin A resistance; does NOT mediate brefeldin resistance; involved in mating-type silencing; elevated in rhp6-1/sng1-1; mediator of Rhp6 in mating type silencing multiply ubiquitination by Rhp6 in vivo; interacts with mat2 locus during S phase; possibly involved in propagation of repressed chromatin structure of the switching donor loci
TI4896S003329	05/D03	-1.01	SPAC3A12.10	rpl2001; yl17b; rpl18a-2; rpl20-1; rpl20	60S ribosomal protein L20a
TI4896S001099	26/E09	-1.01	SPBC354.02c	sec61	translocon (alpha subunit); involved in protein-ER targeting; essential
TI4896S003290	23/H02	-1.01	SPAC6F12.11c	sfc1	RNA polymerase III transcription factor (TFIIIC subunit); A box associated binding subunit
TI4896S004575	31/F06	-1.01	SPAC9E9.07c	ypt2	small GTPase; Ypt subfamily; essential; involved in intracellular protein transport and exocytosis
TI4896S002467	16/H01	-1.01	SPBC21C3.07c		methyltransferase
TI4896S004958	25/F11	-1.01	SPAC4D7.08c	ade4; min13; aza1	amidophosphoribosyltransferase; glutamine phosphoribosylpyrophosphate amidotransferase; involved in purine biosynthesis; purine nucleotide de-novo biosynthetic pathway; involved in glutamate metabolism; expression not repressed by ade4
TI4896S004926	52/A04	-1.00	SPAC11E3.04c	ubc13; spu13	ubiquitin conjugating enzyme; involved in ubiquitination (lys63); involved in DNA repair; involved in DNA postreplication repair
TI4896S001691	04/D09	-1.00	SPBP23A10.02		hypothetical protein
TI4896S004542	46/E09	-1.00	SPAC23D3.10c	eng2	glycosyl hydrolase family 81; endo-1,3-beta-glucanase; similar to Sp eng1
TI4896S003938	36/G08	-1.00	SPAC3F10.13		UBA domain; involved in protein deubiquitination (implicated); ubiquitin-binding protein
TI4896S002097	11/F01	-1.00	SPBC2A9.08c	sec22	the synaptobrevin family; 1 v-SNARE coiled-coil homology domain;1 longin domain; required for transport from the ER to the Golgi complex (By similarity)
TI4896S001608	23/A06	-1.00	SPBC18H10.09		hypothetical protein; zinc finger protein; no apparent orthologs
TI4896S001595	21/H02	-1.00	SPBC11G11.02c	end3	actin cortical patch component; involved in endocytosis; EF hand motif; calcium binding protein
TI4896S002490	16/G09	-1.00	SPBC23E6.10c		translation initiation factor; eif-2 family; involved in translation
TI4896S003775	09/D11	-1.00	SPAC19A8.10		zinc finger protein; zf-C3HC4 type (RING finger); ubiquitin ligase (E3); similar to Sp SPAC343.18 (paralog); no apparent orthologs
TI4896S002778	49/C03	-0.99	SPAC977.16c	dak2	dihydroxyacetone kinase; induced by glycerol (WB); repressed by glucose (WB)
TI4896S001731	05/G12	-0.99	SPBC18E5.08		N-acetyltransferase; no apparent Sc ortholog
TI4896S001637	12/E02	-0.99	SPBC3H7.13		FHA domain (phosphopeptide binding)
TI4896S000141	06/C02	-0.99	SPCC306.01	rpt4; SPCC1682.16	19S proteasome regulatory subunit; AAA family ATPase
TI4896S004964	30/G04	-0.99	SPAC3G6.01	hrp3	helicase C-terminal domain; DEAD/DEAH box helicase; chromodomain protein; involved in heterochromatin silencing
TI4896S002938	37/E10	-0.99	SPAC24H6.06		preinitiation complex component; involved in DNA replication (initiation); involved in Cdc45p loading onto chromatin; interacts physically with Cdc45p; interacts physically with MCM proteins; associates with the replication origin during G1-S phase; predicted coiled-coil region
TI4896S000081	34/H07	-0.99	SPCC794.03		amino acid permease family; similar to Sp SPBC15C4.04C and SPAPB24D3.02C and SPCC74.04 and SPAC1039.01 and SPAC11D3.08C and SPCC584.13 and SPAC9.10 and SPCC794.03
TI4896S001170	24/F11	-0.99	SPBC119.14	rti1	involved in DNA repair; involved in double-strand break repair; essential; involved in S phase completion (required); similar to Sp rad22
TI4896S001052	38/H03	-0.98	SPBC582.11c	nup107; SPBC428.01c	nucleoporin; nuclear pore complex (putative); essential
TI4896S000168	15/H02	-0.98	SPCC4G3.03		WD repeat protein; apoptotic protease activating factor, by low similarity to human spaf1 (conserved residues)
TI4896S002702	13/E01	-0.98	SPBC1539.08		ADP-ribosylation factor predicted; ARF family; function GTP-binding protein that functions as an allosteric activator of the cholera toxin catalytic subunit, an ADP- ribosyltransferase; involved in protein trafficking; may modulate vesicle budding and uncoating within the Golgi apparatus (By similarity).; similar to S. pombe SPBC4F6.18c
TI4896S004381	35/F11	-0.98	SPAC2F3.08	sut1	alpha-glucoside transporter; function overlapping with?; glycoside-pentoside-hexuronide cation symporter family; major facilitator superfamily; involved in maltose uptake; no apparent Sc ortholog
TI4896S003389	45/A09	-0.98	SPAC23H4.10c	thi4	bifunctional enzyme; involved in thiamine biosynthesis; hydroxyethylthiazole kinase; thiamine-phosphate dipyrophosphorylase
TI4896S001301	13/D03	-0.98	SPBC1734.09		NST UDP-N-acetylglucosamine transporter
TI4896S004701	31/G02	-0.98	SPAPYUG7.04c	rpb9	DNA-directed RNA polymerase II (subunit); involved in transcription from Pol II promoter; DNA-directed RNA polymerase activity (function of complex);
TI4896S002209	49/E01	-0.98	SPBC776.14	plh1	phospholipids diacylglycerol acyltransferase
TI4896S004462	36/C03	-0.98	SPAC25B8.08		hypothetical protein
TI4896S003460	46/E11	-0.97	SPAC105.03c		putative transcriptional activator; possible activator for allantoin, 4-aminobutyric acid (GABA), and urea catabolic genes; zinc finger protein (201others); zf-fungal Zn(2)-Cys(6) binuclear cluster domain; similar to Sp SPAC25B8.11 (paralog)
TI4896S001171	19/F09	-0.97	SPBC119.15		conserved hypothetical; ATP-binding protein
TI4896S000856	18/C08	-0.97	SPCC965.03		vacuolar ATP synthase subunit; V-type ATPase (D subunit); vacuolar proton pump component; V1 sector
TI4896S003144	27/C06	-0.97	SPAC222.13c		6-phosphofructo-2-kinase activity; involved in fructose 2,6-bisphosphate metabolism
TI4896S001833	03/B06	-0.97	SPBC24C6.01c	ubl1; ned8; SPBC12D12.08c	ubiquitin family protein; SCF ubiquitin ligase activator; induced by stress; involved in protein deneddylation; involved in protein neddylation
TI4896S002712	22/A01	-0.97	SPBC1289.08		UDP-n-acetylglucosamine pyrophosphorylase; involved in UDP-GLCNAC biosynthesis (4th step)
TI4896S004882	34/F11	-0.96	SPAC26F1.10c	pyp1	protein-tyrosine phosphatase; negative regulator of mitosis; negative regulator of nutrient monitoring pathways; dephosphorylate an osmosensing MAP kinase controlling cell size at division; similar to Sp pyp2
TI4896S002128	36/G02	-0.96	SPBC15D4.09c		cystathionine gamma-synthase; involved in cysteine metabolism; involved in methionine biosynthesis from homoserine via O-succinyl-L; homoserine and cystathione; cystathionine gamma-synthase activity
TI4896S000438	20/H04	-0.96	SPCC550.12		actin-like protein
TI4896S002366	48/E11	-0.96	SPBC887.12		P-type ATPase; P4 type; aminophospholipid translocase
TI4896S004182	49/A01	-0.96	SPAC3H5.04	aar2	U1 snRNP component
TI4896S003739	26/H05	-0.95	SPAC22H10.09		sequence orphan; hypothetical protein
TI4896S004225	26/A12	-0.95	SPAC1B1.01	rdp1	transcription factor; zinc finger protein; zf-C2H2 type; regulator of rhp51 whose promoter has damage responsive elements (DREs); essential; no apparent orthologs
TI4896S000205	19/C08	-0.95	SPCC1672.01		histidinol-phosphatase; involved in histidine metabolism
TI4896S001348	47/G11	-0.95	SPBC1306.02	SPBC4.08	conserved hypothetical; WD repeat protein
TI4896S001191	36/D07	-0.95	SPBC530.04		non-essential; serine-rich protein; involved in cell polarity; no apparent orthologs; carboxy-terminal prenylation signal
TI4896S000807	18/B04	-0.95	SPCC1620.07c		sequence orphan; hypothetical protein
TI4896S002255	21/G11	-0.95	SPBC17D11.01	SPBC20F10.11	SUMO/centrin/Ubl1 specific protease family
TI4896S000802	24/C07	-0.95	SPCC1620.02	wtf23; wtf10	wtf element
TI4896S000984	51/H11	-0.95	SPBC800.14c		hypothetical protein; sequence orphan
TI4896S000834	17/D03	-0.95	SPCC1919.09	tif6	translation initiation factor
TI4896S002809	18/B05	-0.95	SPAC5H10.04		NADPH dehydrogenase; similar to Sp SPAC5H10.10 (paralogs)
TI4896S002883	22/C08	-0.95	SPAC12G12.07c		hypothetical coiled-coil protein; no Sc ortholog; similar to A. thaliana T7N9.15; has domain similar to integrin-a cytoplasmic region
TI4896S000296	09/F06	-0.95	SPCC1393.04		hypothetical protein; sequence orphan
TI4896S003697	40/G05	-0.95	SPAC13G7.02c	hsp70	heat shock protein 70 family; similar to Sp SPCC1739.13 (paralog)
TI4896S000186	24/C06	-0.95	SPCC970.02		glycosyl hydrolase family; alpha-1,6-mannanase; similar to Sp SPAC3C7.05c; GPI anchored protein; glycoprotein
TI4896S003592	29/H12	-0.94	SPAC607.10	spo3	involved in sporulation (required); involved in prospore membrane formation (required); expressed only during sporulation; non-essential; no apparent orthologs; involved in ascospore formation (required); essential
TI4896S002150	09/B12	-0.94	SPBC30D10.14		dienelactone hydrolase family; involved in chlorocatecol degradation; similar to Sp SPAC977.15 (paralog)
TI4896S002669	33/B05	-0.94	SPBC16A3.01	spn3; SPBC543.01c	septin; involved in cytokinesis
TI4896S003714	25/B02	-0.94	SPAC6C3.07		sequence orphan; hypothetical protein
TI4896S001854	29/B10	-0.94	SPBC19G7.10c		topoisomerase associated protein
TI4896S002363	38/H02	-0.94	SPBC887.09c		leucine-rich repeat protein
TI4896S004365	19/C07	-0.94	SPAC323.01c		NAD/NADH kinase; ATP dependent; involved in nicotinamide metabolism
TI4896S000309	06/D01	-0.94	SPCC2H8.05c	SPCC63.01c	hypothetical coiled coil protein; hypothetical protein; sequence orphan; predicted coiled-coil region
TI4896S001202	25/B05	-0.94	SPBC661.01	SPBC530.15c	phosphatidylserine decarboxylase; involved in phosphatidylcholine biosynthesis; phosphatidylserine decarboxylase activity; localization mitochondrial inner membrane; similar to Sp SPBC16E9.18
TI4896S001180	12/H07	-0.94	SPBC577.08c		thioredoxin-like protein
TI4896S004353	11/A12	-0.93	SPAC1071.09c		DNAJ domain protein
TI4896S003097	32/C12	-0.93	SPAC23G3.05c		regulator of G-protein signaling (RGS) domain; involved in cell polarity
TI4896S001529	31/C12	-0.93	SPBC29B5.03c	rpl26	60S ribosomal protein L26; KOW motif
TI4896S004696	22/E09	-0.93	SPAC458.06		WD repeat protein
TI4896S003622	38/B07	-0.93	SPAC20H4.09	SPAC145.03	DEAD/DEAH box helicase; ATP-dependent; RNA helicase; involved in mRNA splicing
TI4896S003424	31/A04	-0.93	SPAC343.11c		zinc finger protein; zf-C5HC2 type; jmjC domain; jmjN domain; similar to retinoblastoma binding proteins; involved in transcriptional regulation; overexpression supresseses chk1 mutant; non-essential; no apparent Sc ortholog
TI4896S002989	15/B02	-0.93	SPAC3H8.04		sequence orphan; hypothetical protein
TI4896S003137	13/F05	-0.93	SPAC222.06		nuclear HMG-like acidic protein; involved in ribosome biogenesis and assembly
TI4896S002397	19/A11	-0.93	SPBP8B7.10c		conserved hypothetical protein; possibly involved in protein synthesis ?????; coiled-coil?
TI4896S000216	20/F01	-0.93	SPCC1672.12c		eukaryotic conserved protein
TI4896S003718	14/E01	-0.93	SPAC17G8.02		uridine ribohydrolase; involved in pyrimidine degradation; similar to Sp SPBC1683.06c (paralog)
TI4896S000207	25/E07	-0.93	SPCC1672.03c		guanine deaminase
TI4896S004014	48/D10	-0.93	SPAC31G5.19		TAT-binding protein homolog; AAA family ATPase; bromodomain protein; similar to Sp SPBP22H7.05C (paralog)
TI4896S001880	24/C05	-0.93	SPBC21D10.11c		aminotranferase class V; cysteine desulpherase; involved in cysteine metabolism; involved in alanine metabolism; possibly supplies inorganic sulfur for iron sulfur clusters; (old->tRNA splicing protein)
TI4896S002566	19/H09	-0.93	SPBC215.09c		acetyl-coA C-acetyltransferase activity; involved in ergosterol biosynthesis
TI4896S001352	33/H09	-0.92	SPBC4.04c	mcm2; nda1; cdc19	MCM complex subunit; involved in DNA replication (initiation) (required); involved in cytokinesis (required); involved in septation (required); expression peaks at M-G1 phase; regulated by PBF transcription complex
TI4896S001853	35/E03	-0.92	SPBC19G7.09	ulp1	Ulp1 protease family; peptidase family C48; cysteine protease; Pmt3 (SUMO)-specific protease; involved in protein deubiquitination and protein desumoylation; non-essential; involved in nuclear morphology maintenance
TI4896S004149	29/G08	-0.92	SPAC26A3.12c	dhp1	5'-3' exoribonuclease; involved in chromosome segregation; involved in RNA processing; essential; functionally complements S. cerevisiae RAT1; involved in meiotic recombination (implicated)
TI4896S003625	25/E01	-0.92	SPAC23C11.01		conserved hypothetical; hypothetical protein
TI4896S002601	48/A12	-0.92	SPBC1861.04c		similar to C-term of yeast U4/U6 splicing factor; RNA-binding protein; involved in mRNA splicing; rrm RNA recognition motif
TI4896S003513	49/G04	-0.92	SPAPB1A10.06c		DEAD/DEAH box helicase; ATP-dependent; RNA helicase; ribonucleoprotein (RNP) complex; processome component; involved in rRNA processing
TI4896S001046	47/C11	-0.92	SPBC582.05c	brc1	BRCT domain; involved in chromosome stability (required); involved in DNA repair checkpoint; non-essential
TI4896S003237	18/A08	-0.92	SPAC22A12.14c		transcriptional regulator; involved in transcriptional regulation; BSD domain
TI4896S004829	18/C11	-0.92	SPAC22E12.07	rna1	Ran GTPase activating protein (RanGAP); leucine-rich repeat protein; functionally complements Sc RNA; involved in mRNA processing
TI4896S001011	36/H03	-0.92	SPBC1271.12	kes1	oxysterol binding protein; involved in ergosterol biosynthesis; similar to Sp SPBC646.08c and SPBC354.07c and SPCC23B6.01; non-essential
TI4896S003547	48/C03	-0.91	SPAC3H1.12c		hypothetical PHD type zinc finger protein with Lid2 complex; zinc finger protein; zf-PHD finger; BAH domain; involved in transcriptional regulation; interacts physically with SET1 complex; involved in regulation of chromatin remodeling; transcriptional regulator; Myb family (inferred from context)
TI4896S003943	31/C01	-0.91	SPAC8F11.01c	rpl4102; rpl41-2; rpl41; SPAC3F10.18c	60S ribosomal protein L41; similar to Sp rpl4101
TI4896S001894	24/E05	-0.91	SPBC12C2.06		DEAD/DEAH box helicase; ATP-dependent; RNA helicase; involved in mRNA expor
TI4896S003455	24/H09	-0.91	SPAC664.14		Amt ammonium transporter
TI4896S000370	47/H07	-0.91	SPCC1795.08c		Myb family; DNA binding protein; SANT subfamily; involved in chromatin remodeling
TI4896S004594	24/D09	-0.91	SPAC17C9.07		glucosyltransferase; dolichyl pyrophosphate; involved in dolichol-linked oligosaccharide biosynthesis
TI4896S004141	39/H07	-0.91	SPAC26A3.04	rpl2002; rpl20-2; rpl20	ribosomal protein L20A
TI4896S002598	37/H08	-0.91	SPBC1861.01c	SPBC56F2.13	AT hook protein; centromeric DNA binding; involved in mitotic spindle integrity (anaphase); involved in spindle elongation
TI4896S003780	36/G01	-0.91	SPAC19A8.05c	vps27	zinc finger protein; zf-FYVE type; involved in Golgi-vacuole transport; complexed with SPBC1734.08; sorting receptor for ubiquitinated membrane proteins (ISS); involved in protyolysis
TI4896S001675	22/H06	-0.91	SPBC1E8.01	SPBC16E9.18	phosphatidylserine decarboxylase proenzyme 1; involved in phosphatidylcholine biosynthesis; phosphatidylserine decarboxylase activity; similar to Sp SPAC25B8.03
TI4896S001539	31/E03	-0.90	SPBC28F2.03	ppi1; cpy2	cyclophilin; peptidyl-prolyl cis-trans isomerase
TI4896S000212	11/D09	-0.90	SPCC1672.08c	tfa2	transcription initiation factor TFIIE (beta subunit)
TI4896S001823	39/F05	-0.90	SPBC16H5.03c	uba2	ubiquitin-activating enzyme E1-like ubiquitin activating enzyme; e1-like
TI4896S004902	21/H08	-0.90	SPAC19D5.07		4-aminobutyrate aminotransferase (GABA transaminase)
TI4896S001127	31/G01	-0.90	SPBC839.13c	rpl1601; rpl16-1; rpl13a-1	60S ribosomal protein L13/L16; similar to Sp rpl1602 and rpl1603
TI4896S002453	46/C09	-0.90	SPBC31F10.11c	cwf4; syf3	hypothetical protein; involved in mRNA splicing; complexed with Cdc5p; 40S snRNP-containing complex
TI4896S003560	17/B09	-0.90	SPAC9G1.12	cpd1	tRNA methyltransferase; involved in tRNA modification; non-essential
TI4896S001889	38/C11	-0.90	SPBC21D10.02	SPBC12C2.11	glucosamine-fructose-6-phosphate aminotransferase
TI4896S004669	10/F08	-0.90	SPAC144.12		ribose 5-phosphate isomerase; involved in pentose-phosphate shunt, non-oxidative branch; ribose-5-phosphate isomerase activity
TI4896S000550	36/B09	-0.90	SPCC584.08	cwf13; snw1; SPCC188.11	SNW family; chromatin binding; complexed with Cdc5p; involved in mRNA splicing; SKIP/SNW domain; interacts with the small subunit of U2AF
TI4896S001544	37/E08	-0.90	SPBC28F2.08c		SEL1 repeat protein; involved in proteolysis; ubiquitin system
TI4896S002694	37/H11	-0.90	SPBC244.01c	sid4	SIN component scaffold protein; involved in cytokinesis; localizes components of the SIN to the SPB; septation initiation pathway; mutant septum initiation defective; interacts physically with Cdc11p (IAP); coiled-coil region; no apparent orthologs
TI4896S000433	25/G01	-0.90	SPCC550.07		acetamidase
TI4896S001937	51/E03	-0.90	SPBC29A10.14	rec8	involved in meiotic recombination (required); cohesin complex (meiotic); centromeric cohesin complex (meiotic); armassociated cohesin complex (meiotic)
TI4896S004853	48/G03	-0.90	SPAPJ730.01	win1; SPAC1006.09; SPAC1250.06c	serine/threonine protein kinase; MAP kinase kinase kinase (MAPKKK); involved in mitotic control; Spc1 SAPK cascade; activator of Wis1p by phosphorylation in response to high osmolarity; G2/M phase transition
TI4896S002716	16/C04	-0.90	SPBC1289.12		conserved hypothetical; RNA-binding protein; rrm RNA recognition motif; mre2??
TI4896S003823	34/F09	-0.90	SPAC823.03	SPAC1E11.03	serine/threonine protein kinase
TI4896S002785	05/F01	-0.90	SPAC1F8.05	isp3; meu4	involved in sexual differentiation; meiotic expression upregulated; no apparent orthologs
TI4896S002138	04/E02	-0.89	SPBC13E7.04	atp16	F1-ATPase (delta subunit); ATP synthesis coupled proton transport
TI4896S001934	51/D03	-0.89	SPBC29A10.11c	vps902; vps9b	guanyl-nucleotide exchange factor activity; involved in intracellular protein transport; involved in protein-vacuolar targeting; CUE domain protein (inferred from context); involved in endocytosis; similar to Ras inhibitors
TI4896S005011	29/B12	-0.89	SPAC869.05c		sulfate transporter; similar to Sp SPBC3H7.02 (paralog)
TI4896S001657	32/H05	-0.89	SPBP16F5.08c		flavin dependent monooxygenase; involved in protein folding; disulphide bond formation
TI4896S002425	33/G03	-0.89	SPBC25D12.03c	mcm7	MCM complex subunit; involved in DNA replication (initiation) (required); essential
TI4896S001994	32/C03	-0.89	SPBC4F6.15c	swi10	endonuclease complex subunit; helix-hairpin-helix; involved in mating-type determination, mismatch repair, nucleotide-excision repair, DNA repair, strand incision
TI4896S000188	47/F11	-0.89	SPCC970.01	rad16; rad10; rad20; swi9	ss DNA endonuclease; involved in DNA repair; involved in mating-type determination; involved in nucleotide-excision repair; involved in meiotic recombination; involved in meiotic gene conversion (required); ERCC4 domain
TI4896S002054	28/F11	-0.89	SPBP4H10.02c	SPBC1346.03; SPBP19A11.07c	hypothetical protein; no apparent Sc ortholog; similar to Sp SPAP27G11.12 (paralog)
TI4896S002078	28/C06	-0.89	SPBC1703.04	mlh1	mutL homolog; involved in DNA repair; involved in mismatch repair
TI4896S002874	24/A09	-0.88	SPAC18B11.01c	SPAC12G12.16c	XP-G family; involved in nucleotide-excision repair; involved in DNA repair; exonuclease; no apparent Sc ortholog; Sp specific duplication
TI4896S001388	18/E12	-0.88	SPBC3D6.02		Sp specific families; glycoprotein; similar to Sp SPAC27D7.09c and SPAC27D7.10c and SPAC27D7.11c (paralogs)
TI4896S001090	05/F07	-0.88	SPBC1685.13		involved in non-classical protein export pathway; non-essential
TI4896S004344	43/G06	-0.88	SPAC4H3.14c		sequence orphan; hypothetical protein; predicted coiled-coil protein
TI4896S003076	12/E01	-0.88	SPAC2G11.04		conserved hypothetical; G-patch domain
TI4896S001720	22/A03	-0.88	SPBC29A3.15c		mitochondrial ribosomal protein small subunit
TI4896S002564	35/E04	-0.88	SPBC215.07c		PWWP domain protein; similar to Sp SPAC23D3.01 and SPBC29A3.13C (paralogs); involved in cell growth
TI4896S000310	45/E11	-0.88	SPCC63.02c		glycosyl hydrolase family 13; alpha-amylase; GPI anchored protein; glycoprotein; no apparent Sc ortholog
TI4896S001840	17/D02	-0.87	SPBC24C6.08c		sequence orphan; hypothetical protein
TI4896S001315	17/E04	-0.87	SPBC1709.07		3-keto sterol reductase; involved in ergosterol biosynthesis
TI4896S002691	28/G08	-0.87	SPBC244.03	sec27; SPBC16C6.13c	coatomer (beta' subunit); 6 WD repeat protein; the coatomer is a cytosolic protein complex that binds to dilysine motifs and reversibly associates with Golgi non- clathrin-coated vesicles, which further mediate biosynthetic protein transport from the ER, via the Golgi up to the trans Golgi network; Coatomer complex is required for budding from Golgi membranes, and is essential for the retrograde …
TI4896S001297	10/G08	-0.87	SPBC1734.05c	spf31	spliceosome associated protein; DNAJ domain protein; involved in mRNA splicing; no apparent Sc ortholog
TI4896S004450	17/D12	-0.87	SPAC26H5.09c		oxidoreductase; GFO_IDH_MocA family; similar to Sp SPBC115.03 (paralog)
TI4896S002377	23/H07	-0.87	SPBC16D10.02		DNA methylase
TI4896S004107	48/F06	-0.87	SPAC6G9.04		pleckstrin homology domain
TI4896S003672	22/E04	-0.87	SPAC13D6.01		hypothetical protein; sequence orphan
TI4896S001477	49/G05	-0.87	SPBP22H7.05c	pi026; SPACTOKYO_453.08	possibly I TAT-binding protein homolog; AAA family ATPase; bromodomain protein; similar to Sp SPAC31G5.19 (paralog)
TI4896S000540	47/H06	-0.86	SPCC11E10.08	rik1	involved in chromatin silencing; involved in chromatin silencing at silent mating type cassettes (sensu Fungi) (required); similar to Sp SPAC17H9.10C (paralog)
TI4896S002474	29/C03	-0.86	SPBC21C3.14c		sequence orphan; hypothetical protein; serine-rich protein
TI4896S003054	28/D08	-0.86	SPAC4G8.03c		RNA-binding protein; pumilio family; similar to Sp SPAC6G9.14
TI4896S004194	15/F03	-0.86	SPAC3A11.03		eukaryotic conserved protein
TI4896S001417	31/C02	-0.86	SPBC27B12.10c		mitochondrial outer membrane translocase complex; involved in mitochondrial outer membrane protein import; mitochondrial import receptor
TI4896S000160	13/D04	-0.86	SPCC4G3.11		conserved hypothetical protein
TI4896S004426	22/D11	-0.86	SPAC23A1.02c		calcineurin-like phosphoesterase
TI4896S003310	20/F02	-0.86	SPAC57A10.12c	ura3	dihydroorotate dehydrogenase; involved in pyrimidine base biosynthesis; dihydroorotate dehydrogenase activity
TI4896S002237	04/F05	-0.86	SPBC25H2.09		hypothetical protein; sequence orphan
TI4896S004297	03/H01	-0.86	SPAC15E1.02c		hypothetical protein; sequence orphan
TI4896S002446	36/A12	-0.86	SPBC31F10.04c	srb4	RNA polymerase II holoenzyme component; mediator complex subunit; essential
TI4896S003656	31/F08	-0.86	SPAC1783.08c	rpl1502; rpl15-2	60S ribosomal protein (L15B subunit)
TI4896S003353	12/F09	-0.85	SPAC5D6.09c		conserved hypothetical; GPR/FUN34 family
TI4896S004249	25/H01	-0.85	SPAC17G6.08	pep7; vac1	zinc finger protein; zf-C2H2 type; zf-FYVE type; prevacuole/endosomal FYVE tethering component; class D vps; YPT5 effector; pi3p binding; involved in golgi-vacuole transport
TI4896S002170	09/B02	-0.85	SPBC1778.08c		ARP2/3 actin-organizing complex; involved in actin cortical patch assembly; involved in actin assembly and function
TI4896S001996	28/F09	-0.85	SPBC4F6.17c		AAA family ATPase; chaperone activit; involved in protein folding; involved in response to stress
TI4896S004801	10/E12	-0.85	SPAC1952.02		hypothetical; similar to Sp SPAC890.05 (a G-patch domain)
TI4896S002966	30/C08	-0.85	SPAC2F7.03c	pom1	DYRK family; dual specificity protein kinase; involved in cell polarity, cytokinesis, contractile ring positioning; similar to Sp SPAC16C9.07
TI4896S003793	24/E03	-0.85	SPAC23H3.10		involved in chromatin remodeling; involved in transcriptional regulation; zinc finger protein; zf-ZZ type; Myb family; DNA-binding protein; �iold->SWI/SNF complex transcriptional regulator)
TI4896S002193	45/C07	-0.85	SPBC609.04		MFS multidrug efflux transporter; similar to Sp SPAC17C9.16c
TI4896S001258	07/E11	-0.85	SPBP35G2.09		U1 snRNP component; involved in mRNA splicing; involved in spliceosome assembly
TI4896S003616	50/E02	-0.85	SPAC20H4.03c	tfs1	transcription elongation factor SII
TI4896S000896	21/C12	-0.84	SPCC1827.06c		aspartate semialdehyde dehydrogenase; involved in threonine biosynthesis; involved in methionine metabolism; aspartate-semialdehyde dehydrogenase activity
TI4896S002824	29/H09	-0.84	SPAC13G6.06c		glycine dehydrogenase (decarboxylating); involved in glycine metabolism; glycine dehydrogenase (decarboxylating) activity
TI4896S004567	26/F01	-0.84	SPAC16.04		dihydrouridine synthase; involved in tRNA modification
TI4896S004900	07/C11	-0.84	SPAC19D5.05c		ribonucleoprotein complex; processome component; involved in rRNA processing; U3 snoRNP component; involved in rRNA processing
TI4896S003041	27/D04	-0.84	SPAC22G7.01c	SPAPJ696.03c	aminopeptidase; peptidase family M24
TI4896S005009	44/C02	-0.84	SPAC869.07c		alpha-galactosidase
TI4896S001351	38/H07	-0.84	SPBC4.03c		SEC23/SEC24 family; SEC24 subfamily; COPII-coated vesicle component (putative); involved in intracellular protein transport
TI4896S002891	04/H01	-0.84	SPAC630.04c		hypothetical protein
TI4896S001293	37/C04	-0.84	SPBC337.17c	SPBC1734.01c	hypothetical protein; Sc YDR365C is null-letha
TI4896S003794	26/E03	-0.84	SPAC23H3.11c		glucosidase activity; involved in beta-1,6 glucan biosynthesis; involved in cell wall organization and biogenesis
TI4896S003057	35/D07	-0.84	SPAC4G8.05		serine/threonine protein kinase; similar to Sp SPBC1861.09
TI4896S004375	06/C04	-0.84	SPAC2F3.02		SRP receptor complex; SRP receptor activity; involved in protein-ER targeting; TPR repeat protein
TI4896S004912	16/A10	-0.84	SPAC14C4.10c		Nudix family hydrolase; involved in the hydrolysis of nucleoside diphosphate derivatives; no apparent Sc ortholog
TI4896S003869	08/C07	-0.84	SPAC644.08		enolase-phosphatase E1
TI4896S004192	33/F01	-0.84	SPAC3A11.05c	kms1	meiosis specific protein; required for the formation of meiotic prophase specific nuclear architecture; involved in telomere clustering during meiotic prophase; mutant displays decreased meiotic recombination; predicted coiled-coil region; 2 predicted transmembrane helices; no apparent orthologs
TI4896S001706	39/A07	-0.84	SPBC29A3.01		heavy metal ATPase; P1 type; similar to S. cerevisiae YDR270W; disease associated Menkes/Wilson disease; 8 predicted transmembrane helices
TI4896S002860	04/A09	-0.83	SPAC1F5.05c		hypothetical protein; sequence orphan; has EST
TI4896S001165	35/A07	-0.83	SPBC119.10		asparagine synthetase
TI4896S002276	01/A02	-0.83	SPBC11C11.12		possible pseudogene; similar to part of protein in cob intron
TI4896S003160	29/B05	-0.83	SPAC139.01c	SPAC955.02c	XP-G family; involved in nucleotide-excision repair; involved in DNA repair
TI4896S000844	34/B11	-0.83	SPCC1840.02c	bgs4	1,3-beta-glucan synthase subunit; glycosyl transferase family 48; involved in cell wall biosynthesis; similar to Sp SPAC24C9.07c and SPBC19G7.05c and SPAC19B12.03
TI4896S003384	28/D10	-0.83	SPAC23H4.15		involved in RNA processing; involved in RNA modification
TI4896S002586	33/A09	-0.83	SPBC56F2.11	met6	homoserine o-acetyltransferase
TI4896S003867	36/C10	-0.83	SPAC644.06c	nim1; cdr1	regulator of Wee1p kinase; serine/threonine protein kinase; involved in mitosis (induction); involved in the regulation of CDK activity
TI4896S004851	32/F01	-0.83	SPAC1006.07	tif1	translation initiation factor (4a subunit); DEAD/DEAH box helicase; helicase C-terminal domain; similar to Sp tif412
TI4896S003035	24/G01	-0.82	SPAC1296.03c	sxa2	serine carboxypeptidase; involved in conjugationdegrades extracellular P-factor; no apparent Sc ortholog
TI4896S004408	34/A09	-0.82	SPAPJ698.03c	prp12; sap130	involved in mRNA splicing; U2 snRNP-associated protein; involved in cell cycle progression; complexed with Cdc5p
TI4896S001357	32/A07	-0.82	SPBC725.02	mpr1; spy1	stress response regulator phosphotransmitter; histidine-containing phosphotransfer domain; respone regulator phosphotransferase; interacts physically with Mcs4p; regulates G2/M progression through the Mcs4 response regulator
TI4896S001102	38/D04	-0.82	SPBC354.05c		DNA-binding protein; involved in transcriptional regulation; myc family; basic helix-loop-helix (bHLH); membrane-tethered transcription factor; no apparent Scortholog
TI4896S002408	25/D05	-0.82	SPBP8B7.21	ubp3	ubiquitin C-terminal hydrolase activity
TI4896S003845	01/F01	-0.82	SPAC7D4.07c	trx1; trx; (trx2)	thioredoxin I; similar to Sp trx1; involved in stress response
TI4896S004698	24/F02	-0.82	SPAPYUG7.01	tfa1; SPAC458.07	transcription initiation factor TFIIE (alpha subunit)
TI4896S004477	10/E02	-0.82	SPAC694.03		hypothetical protein
TI4896S002077	37/C10	-0.82	SPBC1703.03c		armadillo repeat protein
TI4896S002382	26/D07	-0.82	SPBC16D10.07c		transcriptional regulator; Sir2p family; histone deacetylase activity; NAD-dependent histone deacetylase activity; involved in transcriptional regulation; involved in chromatin silencing; involved in chromatin silencing at silent mating type cassettes (sensu Fungi) (required); involved in chromatin silencing at centromere (required); involved in chromatin silencing at telomere (required); involve…
TI4896S004008	12/H09	-0.81	SPAC31G5.13	rpn11; pad1; sks1; bfr2	19S proteasome regulatory subunit; MOV34 domain; essential; positive regulator of pap1 dependent transcription; involved in the maintenance of chromosome structure; overexpression confers multidrug resistance; involved in deubiquitination
TI4896S002676	31/H06	-0.81	SPBC543.08		involved in inositol phospholipid biosynthesis
TI4896S000228	12/H01	-0.81	SPCC31H12.02c		putative ion channel; conserved protein; similar to heat shock protein
TI4896S002510	05/H06	-0.81	SPBC1604.10	srb7	RNA polymerase II holoenzyme component; mediator complex subunit; involved in regulating RNA polymerase II activity
TI4896S002969	24/F07	-0.81	SPAC2F7.06c		DNA polymerase X family; involved in DNA repair; involved in double-strand break repair
TI4896S000346	04/C01	-0.81	SPCC24B10.09	rps1702; rps17; rps17-2	40S ribosomal protein S17
TI4896S001193	39/C04	-0.81	SPBC530.06c		putative eukaryotic translation initiation eukaryotic translation initiation factor 3 (alpha subunit)
TI4896S003129	36/G07	-0.81	SPAC1687.18c		hypothetical protein; sequence orphan
TI4896S001586	31/E10	-0.81	SPBC2F12.04	rpl17	60S ribosomal protein L17; similar to Sp rpl1702
TI4896S002562	32/E11	-0.81	SPBC215.05	gpd1	glycerol-3-phosphate dehydrogenase; induced by osmotic stress; similar to Sp gpd2 (paralog)
TI4896S003183	27/F12	-0.81	SPAC23C4.18c	rad4; cut5	involved in DNA replication checkpoint, S-M checkpoint control; DNA polymerase (epsilon subunit)
TI4896S004858	39/B09	-0.81	SPAC1250.01	SPAC29A4.21	putative transcriptional regulator chromatin remodeling complex; involved in transcriptional activation; SNF2 family; helicase C-terminal domain; DEAD/DEAH box helicase; bromodomain protein; HSA domain
TI4896S000456	37/G04	-0.80	SPCC645.13		zinc finger protein; zf-PHD finger; TFS2M domain; tranSpriptional regulator; involved in transcriptional regulation
TI4896S004223	18/D10	-0.80	SPAC16E8.16		transcription initiation factor TFIIB
TI4896S001699	28/F03	-0.80	SPBP23A10.10		serine/threonine protein kinase
TI4896S004275	05/F09	-0.80	SPAC8C9.10c		hypothetical protein; sequence orphan
TI4896S004396	14/F12	-0.80	SPAC27E2.02		conserved protein; UPF0029; involved in general amino acid control response; similar to M. musculus IMPACT protein
TI4896S003168	46/C04	-0.80	SPAC23C4.02	crn1	yeast coronin CRN1 homolog; WD repeat protein; coronin family; involved in actin cytoskeletal organization; actin-binding protein; actin cortical patch component
TI4896S004555	26/B11	-0.80	SPAC30.06	prp3; SPAC29E6.02	U4/U6 small nuclear ribonucleoprotein; involved in mRNA splicing
TI4896S001337	08/A05	-0.80	SPBC409.12c		hypothetical protein
TI4896S004943	21/E04	-0.79	SPAP8A3.07c		phospho-2-dehydro-3-deoxyheptonate aldolase
TI4896S000434	09/A09	-0.79	SPCC550.08		N-acetyltransferase; no apparent Sc ortholog
TI4896S003525	21/D03	-0.79	SPAC140.03		hypothetical protein; sequence orphan
TI4896S002610	32/F12	-0.79	SPBC14F5.04c	pgk1	phosphoglycerate kinase; glycolysis
TI4896S002843	15/A02	-0.79	SPAC806.01	SPAC24B11.13	porphobilinogen deaminase (putative)
TI4896S003440	34/H12	-0.79	SPAC824.08	gdp1	guanosine-diphosphatase Gda1; similar to S. cerevisiae YEL042W; 1 predicted transmembrane helix; predicted N-terminal signal sequence; double mutant gda1delta/ynd1delta lethal
TI4896S004601	14/B01	-0.79	SPAC1851.03	ckb1	casein kinase II (beta subunit)
TI4896S003089	43/E02	-0.79	SPAC521.02		zinc metallopeptidase
TI4896S000137	21/C10	-0.79	SPCC1682.12c	ubp16	ubiquitin C-terminal hydrolase activity
TI4896S004781	13/H08	-0.79	SPAC1B3.01c		uracil phosphoribosyltransferase
TI4896S001719	41/A09	-0.78	SPBC29A3.14c	trt1	telomerase catalytic subunit; reverse transcriptase 1
TI4896S000453	24/E08	-0.78	SPCC645.10		tRNA nucleotidyltransferase
TI4896S004361	36/H08	-0.78	SPAC926.06c		leucine-rich repeat protein
TI4896S000318	27/C08	-0.78	SPCC63.11	prp28	DEAD/DEAH box helicase; U5 snrnp-like RNA helicase; involved in mRNA splicing
TI4896S002693	23/F03	-0.78	SPBC244.02c		HAT repeat protein
TI4896S001617	51/C01	-0.78	SPBC18H10.18c		hypothetical protein; sequence orphan; recent duplication; similar to Sp SPCC1682.06
TI4896S003339	34/C06	-0.78	SPAC9.03c	brr2	U5 snRNP-specific protein; DEAD/DEAH box helicase; RNA helicase; helicase C-terminal domain; AAA family ATPase; Sec63 domain; involved in mRNA splicing; complexed with Cdc5p
TI4896S000334	10/A09	-0.78	SPCC16A11.13	luc7	U1 snRNA-associated protein; involved in mRNA splicing; predicted coiled-coil region
TI4896S000517	02/G12	-0.78	SPCC622.09	htb1	histone h2b-alpha
TI4896S003349	10/D05	-0.78	SPAPJ735.01c	cwf16; SPAC9.13c	eukaryotic conserved protein; involved in mRNA splicing; interacts physically with Cdc5p; interacts with other cwf proteins; involved in cell cycle control
TI4896S002804	36/B03	-0.78	SPAC11D3.17		involved in transcriptional regulation; zinc finger protein; zf-C2H2 type; no apparent orthologs
TI4896S003515	50/E10	-0.78	SPAPB1A10.08		hypothetical protein; sequence orphan
TI4896S002926	06/B12	-0.78	SPAC13C5.06c		hypothetical protein; sequence orphan
TI4896S003553	37/F11	-0.78	SPAC9G1.05		WD repeat protein; actin cortical patch component; involved in stress response
TI4896S004113	31/B03	-0.78	SPAC6G9.10c	sen1	DNA2/NAM7 family; DEAD/DEAH box helicase; RNA helicase; tRNA-splicing endonuclease positive effector; involved in tRNA splicing & snRNA and snoRNA maturation; similar to Sp SPBC29A10.10c
TI4896S002134	40/B11	-0.78	SPBC15D4.15	pho2	p-nitrophenylphosphatase; involved in polyphosphate metabolism
TI4896S001552	43/C02	-0.77	SPBC21B10.10	rps402; rps4-2	40S ribosomal protein S4
TI4896S000162	26/F05	-0.77	SPCC4G3.09c		TBC domain protein; GTPase activating protein of Rab-like GTPase
TI4896S000280	37/F09	-0.77	SPCC14G10.05	SPCC1020.13c	phospholipase; DDHD domain; similar to Sp SPAC2G8.02 (paralog)
TI4896S002300	29/B09	-0.77	SPBC4B4.03	rsc1	involved in chromatin remodeling; bromodomain protein; BAH domain
TI4896S000717	27/F02	-0.77	SPCC74.03c		serine/threonine protein kinase; involved in the regulation of carbohydrate metabolism; similar to Sp SPAC23H4.02
TI4896S004963	27/G08	-0.77	SPAC4D7.13	prp40	involved in mRNA splicing; WW domain; U1 snRNA-associated protein; formin binding protein
TI4896S003540	24/B09	-0.76	SPAC3H1.05		CAAX prenyl protease; peptidase family M48
TI4896S000399	45/D10	-0.76	SPCC1259.09c		pyruvate dehydrogenase protein x component; involved in acetyl-CoA biosynthesis from pyruvate; biotin/lipoyl attachment site; e3 binding domain
TI4896S004294	46/F11	-0.76	SPAC15A10.13		serine/threonine protein kinase; POLO family protein kinase
TI4896S004153	16/C12	-0.76	SPAC26A3.16		ubiquitin family protein; UBA domain; ubiquitin-binding protein; involved in protein deubiquitination; central region has repeat containing domain, possibly related to TPR repeats
TI4896S001967	36/G09	-0.76	SPBC6B1.10		WD repeat protein; involved in mRNA splicing; complexed with Cdc5p
TI4896S001947	26/D02	-0.76	SPBC2G5.08	SPBC25B2.01	elongation factor 1 alpha
TI4896S001705	05/G11	-0.76	SPBP23A10.16	sdh4	succinate dehydrogenase (ubiquinone) (cytochrome b small subunit); membrane anchor subunit; inner membrane translocase component; involved in mitochondrial electron transport, succinate to ubiquinone; involved in tricarboxylic acid cycle; involved in protein-membrane targeting; involved in protein-mitochondrial targeting; protein binding activity
TI4896S002272	27/B05	-0.75	SPBC11C11.03	ndc10; tid3	involved in chromosome segregation; predicted coiled-coil regions; spindle pole body protein
TI4896S002934	17/D05	-0.75	SPAC24H6.10c		phospho-2-dehydro-3-deoxyheptonate aldolase; shikimate pathway (1st step)
TI4896S002362	03/F05	-0.75	SPBC887.08		very hypothetical protein
TI4896S004470	27/H04	-0.75	SPAC25B8.16		ribonuclease subunit; involved in tRNA maturation, rRNA processing
TI4896S001034	18/G12	-0.75	SPBC106.12c		RNA-binding protein; rrm RNA recognition motif; no apparent Sc ortholog
TI4896S001847	39/G07	-0.75	SPBC19G7.03c	rps3002; rps30-2; ysprs30; rps30	40S ribosomal protein S30
TI4896S004747	20/H03	-0.74	SPAC4F10.08		hypothetical protein; sequence orphan
TI4896S002329	03/G11	-0.74	SPBC1718.03		nucleolar protein; hypothetical coiled-coil protein; interacts with RNA polymerase I
TI4896S004949	34/E06	-0.74	SPAP8A3.13c		sequence orphan; hypothetical protein
TI4896S002595	31/E11	-0.74	SPBC56F2.02	rpl1901; rpl19-1	60S ribosomal protein L19
TI4896S001534	30/B07	-0.74	SPBC27.04		predicted coiled-coil protein
TI4896S004002	31/H07	-0.74	SPAC31G5.08	ups1; ups1	uroporphyrinogen-III synthase
TI4896S001329	09/G06	-0.74	SPBC409.04c	mis12	inner centromere protein; involved in chromosome segregation (required); involved in centromere structure (maintenance) (required)
TI4896S004667	21/D06	-0.74	SPAC144.10c		involved in GPI anchor biosynthesis
TI4896S002624	26/A04	-0.74	SPBC3F6.06c	SPBC342.01c	glycosyl transferase family ALG8
TI4896S003043	48/B08	-0.74	SPAC22G7.02		karyopherin-beta; involved in nuclear transport
TI4896S000159	28/G12	-0.74	SPCC4G3.12c		zf-C3HC4 type (RING finger); Ub ligase (E3); no Sc ortholog; possibly LIM domain interacting by similarity to mouse RNF12; serine-rich protein
TI4896S000477	01/H10	-0.73	SPCC1322.15	rpl3402; rpl34-2	60S ribosomal protein L34
TI4896S002271	46/G01	-0.73	SPBC11C11.02	imp2	involved in contractile ring assembly; non-essential; involved in cytokinesis; FCH domain; src (SH3) homology domain; similar to Sp SPAC20G8.05C; involved in septation (required)
TI4896S000171	43/H11	-0.73	SPCC364.06		involved in nucleosome assembly; similar to Sp SPBC2D10.11C (paralog)
TI4896S001991	21/C07	-0.73	SPBC4F6.12		LIM domain; leupaxin like; no apparent Sc ortholog
TI4896S002122	39/F12	-0.73	SPBC15D4.03	slm9	WD repeat protein; involved in mitotic control WD repeat protein; involved in mitotic control; pleiotrophic signal transducer for cell growth; similar to Sp SPBC15D4.03
TI4896S002890	33/C01	-0.73	SPAC630.03	act2	ARP2/3 actin-organizing complex; involved in actin cortical patch assembly; actin-like protein; essential; involved in cell polarity; involved in endocytosis; actin cortical patch component; interacts genetically with Cdc3p; essential
TI4896S003770	27/H01	-0.73	SPAC19A8.15	trp2	tryptophan synthase
TI4896S004783	16/E05	-0.73	SPAC1B3.03c	wis2; cyp5	cyclophilin; involved in the regulation of mitosis; TPR repeat protein (inferred from context); heat shock inducible 40 kDa protein; peptidyl-prolyl cis-trans isomerase
TI4896S004754	26/G03	-0.73	SPAC4F10.15c	wsp1	Wiskott-Aldrich homolog; involved in stress response; involved in cytokinesis; involved in actin cytoskeletal organization; involved in control of the actin cytoskeleton; actin cortical patch component; involved in actin cortical patch assembly; involved in actin cortical patch distribution; promoter homolD box; involved in endocytosis
TI4896S004348	42/B12	-0.73	SPAC1071.04c		putative signal peptidase; signal peptidase complex
TI4896S001969	31/D08	-0.73	SPBC3E7.02c	hsp16	heat shock protein 16; Hsp20 family; expression in response to nucleotide depletion is regulated via the spc1/MAPK pathway; similar to Sp SPCC338.06c
TI4896S004736	35/D12	-0.73	SPAC20G4.05c		hypothetical protein; UPF0061 family
TI4896S001179	34/G07	-0.73	SPBC577.07	ubp10	ubiquitin C-terminal hydrolase activity; zinc finger protein; zf-UBP type; putative snRNP assembly factor; involved in mRNA spcing
TI4896S004244	37/A04	-0.73	SPAC17G6.03		calcineurin-like phosphoesterase; similar to Sp SPAC1039.02 and SPBPB2B2.06c (paralogs)
TI4896S003095	32/G08	-0.73	SPAC23G3.03		peptide monooxygenase; no apparent Sc ortholog
TI4896S001332	33/D12	-0.73	SPBC409.07c	spc2; wis1; smf2	serine/threonine protein kinase; MAP kinase kinase (MAPKK); Spc1 SAPK cascade; involved in cell cycle progression; involved in mitotic control; dosage dependent regulator of mitosis
TI4896S004715	05/A05	-0.73	SPAC1782.12c		conserved protein; conserved in bacteria and plants protein; DUF423; no apparent Sc ortholog
TI4896S003500	51/H09	-0.73	SPAC1002.21		very hypothetical protein
TI4896S002143	14/B09	-0.73	SPBC13E7.09		verprolin; proline-rich protein; involved in actin cytoskeletal organization; actin cortical patch component; Wiskott-Aldrich homolog; involved in endocytosis
TI4896S003826	04/C06	-0.72	SPAC823.06		general RNA polymerase II transcription factor; TFIID complex; TAF(II) complex
TI4896S003154	23/F01	-0.72	SPAC821.08c	slp1	WD repeat protein; Cdc20/Fizzy family; spindle assembly checkpoint component; interacts physically with Mad2p; effector of the Mad2-dependent spindle checkpoint; involved in DNA; damage recovery (required); APC activator; interacts genetically with p34cdc2; synthetically lethal with cdc25; synthetically lethal with cdr1; synthetically lethal with cdr2
TI4896S004176	41/B04	-0.72	SPAC3H5.10	rpl3202; rpl32; rpl32-2	60S ribosomal protein L32
TI4896S003928	27/A09	-0.72	SPAC3F10.03		glycine tRNA-ligase; functionally complements Sc GRS1
TI4896S001214	22/A07	-0.72	SPBC36.12c	git7; SPBC713.01c	glucose insensitive transcription; cyclic AMP (cAMP) signaling pathway component; essential; requirement appears to be due to roles in septation and cell wall integrity; involved in adenylate cyclase activation (required); mutants are sensitive to benomyl; CS domain; SGS domain; TPR repeat protein
TI4896S003175	25/E02	-0.72	SPAC23C4.10	sec2	guanine nucleotide exchange factor; coiled-coil domain is essential for function in Sc SEC2; involved in intracellular protein transport
TI4896S000569	21/G09	-0.72	SPCC1753.06c	SPCC162.12	hypothetical protein; serine-rich protein; sequence orphan
TI4896S002835	16/A05	-0.72	SPAC24B11.06c	spc1; sty1; phh1	serine/threonine protein kinase; Spc1 SAPK cascade; interacts physically with SPBC9B6.10; MAP kinase (MAPK); acts downstream of 2 component response regulator; involved in mitotic checkpoint; involved in spindle orientation; involved in oxidative stress response
TI4896S000372	06/G06	-0.72	SPCC1795.06	map2	pheromone P-factor; involved in sexual differentiation; involved in cell cycle control; no apparent orthologs
TI4896S004045	41/D06	-0.72	SPAC589.03c		sequence orphan; hypothetical protein
TI4896S002066	39/G11	-0.72	SPBP4H10.13	rps2302; rps23-2	40S ribosomal protein S23
TI4896S004488	46/A07	-0.72	SPAC1F7.08	fio1	iron transport multicopper oxidase
TI4896S004234	39/C10	-0.72	SPAC17A2.06c		hyptohetical protein; WD repeat protein; clathrin domain; zinc finger protein; zf-C3HC4 type (RING finger); ubiquitin ligase (E3)
TI4896S004757	21/F03	-0.71	SPAC4F10.18		conserved hypothetical protein; WD repeat protein; no apparent Sc ortholog
TI4896S002310	33/B07	-0.71	SPBC4B4.13c	liz1; SPBC2G2.01c	transporter; unknown specificity; required for normal cell division when ribonucleotide reductase is inhibited
TI4896S004679	03/B12	-0.71	SPAC1834.04	h3.1; hht1	histone H3; similar to Sp hht2 and hht3
TI4896S000663	45/E03	-0.71	SPCC1442.09	trp3	anthranilate synthase (component I)
TI4896S003821	49/F04	-0.71	SPAC823.01c	tif33; SPCP1E11.01c; SPAC4A8.16c	translation initiation factor 3 (eif3 subunit); PCI domain
TI4896S002364	33/B11	-0.71	SPBC887.10	mcs4	mitotic catastrophe suppressor; response regulator receiver domain; involved in stress response; involved in cell cycle regulation; Wik1-Wis1-Spc1 kinase cascade
TI4896S003366	25/B01	-0.71	SPAC57A7.08	phz1; pzh1	serine/threonine protein phosphatase pp-z; involved in salt tolerance; involved in the regulation of the plasma membrane H+-ATPase; regulates Na+ ion influx independently of Trk1p
TI4896S004411	38/E10	-0.71	SPAC19G12.02c	pms1	involved in DNA repair; involved in mismatch repair; MMR pathway; mismatch-binding; mutL homolog
TI4896S004554	34/F01	-0.71	SPAC30.05	pof1; SPAC29E6.01	F-box protein; WD repeat protein; no apparent Sc ortholog
TI4896S004081	08/A09	-0.71	SPAC3G9.15c		eukaryotic conserved protein
TI4896S003196	25/G04	-0.70	SPAC30D11.14c		conserved hypothetical; KH domain; no apparent Sc ortholog
TI4896S002814	10/B09	-0.70	SPAC5H10.09c		3-methyl-2-oxobutanoate hydroxymethyltransferase; involved in pantothenate biosynthesis (first step); possibly coexpressed with SPAC5H10.08c which is also involved in pantothenate biosynthesis
TI4896S000087	28/G05	-0.70	SPCC794.08		hypothetical protein
TI4896S001868	32/C02	-0.70	SPBC36B7.08c		involved in chromatin decondensation; template activating factor; involved in nucleosome assembly; similar to human oncoprotein SET (TAF1beta)
TI4896S003527	49/F07	-0.70	SPAC110.01	SPAC140.05	putative 5'-AMP-activated protein kinase; serine/threonine protein kinase
TI4896S002247	20/G05	-0.70	SPBC20F10.03		conserved eukaryotic protein; developmental regulator-like; involved in signal transduction; no apparent Sc ortholog; non-essential
TI4896S001743	13/D01	-0.70	SPBC23G7.07c		conserved hypothetical protein
TI4896S003163	27/A07	-0.70	SPAC139.03		transcriptional regulator; zinc finger protein; similar to Sp SPAC3C7.04 (paralog)
TI4896S001135	34/G02	-0.70	SPBC947.15c		NADH dehydrogenase
TI4896S004933	52/B08	-0.70	SPAC11E3.11c		guanine nucleotide exchange factor; Sec7 domain; pleckstrin homology domain
TI4896S001901	39/F06	-0.70	SPBC17F3.02	nak1	N-terminal serine/threonine protein kinase; involved in cellular morphogenesis (regulation); essential; involved in cell growth (regulation); PAK-related kinase Nak1; GCK subfamily; essential
TI4896S004896	37/E03	-0.70	SPAC19D5.01	pyp2	protein-tyrosine phosphatase; functionally overlapping with; nuclear/cytoplasmic; rhodanase-like domain; negative regulator of meiosis; dephosphorylate an osmosensing MAP kinase controlling cell size at division; inactivates Sty1p kinase in response to stress; similar to Sp pyp1
TI4896S003170	20/H06	-0.70	SPAC23C4.05c		Sp specific families; hypothetical protein; similar to Sp SPBC365.12c (C-term); no apparent orthologs
TI4896S004181	41/B08	-0.70	SPAC3H5.05c	rps1401; rps14-1; rps14	40S ribosomal protein S14
TI4896S004373	13/F01	-0.70	SPAC2F3.01	SPAC323.09	involved in the synthesis of mannosylated sphingolipids
TI4896S002080	27/F04	-0.70	SPBC1703.06	pof10	F-box protein
TI4896S002234	33/E10	-0.70	SPBC25H2.12c	cct7	chaperonin-containing T-complex; T-complex protein 1 (eta subunit); involved in protein folding; involved in actin folding; involved in tubulin folding
TI4896S000259	05/D11	-0.70	SPCC16C4.16c		hypothetical protein; possibly fungal specific; similar to N. crassa 65E11.120; no apparent Sc ortholog
TI4896S001262	13/D02	-0.69	SPBP35G2.13c		eukaryotic conserved protein
TI4896S001775	38/A02	-0.69	SPBC17G9.08c	csx2	ADP-ribosylation factor (ARF); GTPase activating protein; ArfGap domain; pleckstrin homology domain; similar to Sp SPAC26A3.10; no apparent Sc ortholog
TI4896S000812	45/H04	-0.69	SPCC1620.12c		RabGAP domain; TBC domain protein; GTPase activating protein of Rab-like GTPase; similar to Sp SPAC26F1.09 (paralog)
TI4896S002460	34/D05	-0.69	SPBC21C3.01c	vps13a; SPBC31F10.18c	involved in intracellular protein transport
TI4896S000278	04/G05	-0.69	SPCC14G10.03c		putative proteasome maturation factor
TI4896S002374	45/F09	-0.69	SPBC418.01c	his4; SPBC887.20c	bifunctional enzyme; 1-(5-phosphoribosyl)-5-[(5-phosphoribosylamino) methylideneamino]imidazole-4-carboxamide isomerase; involved in histidine biosynthesis (4th step); glutamine amidotransferase
TI4896S002663	22/G05	-0.69	SPBC16A3.06		tRNA specific adenosine deaminase
TI4896S004653	05/H05	-0.69	SPAC30C2.05	erv14	cornichon family; 3 predicted transmembrane helices; predicted N-terminal signal sequence; involved in intracellular protein transport; ER-derived vesicle protein; involved in intracellular protein transport; involved in ER to Golgi transport; COPII-coated vesicle associated; similar to Sp SPAC2C4.05
TI4896S001045	46/F04	-0.69	SPBC582.04c		hypothetical protein; sequence orphan; non-essential
TI4896S002480	30/C11	-0.69	SPBC21C3.20c		C2 domain; similar to Sp SPAC11E3.02C
TI4896S004951	48/H07	-0.69	SPAP8A3.15c	sec71; sec7a; SPAC4D7.01c	Sec7 homolog; involved in intracellular protein transport; similar to S. pombe SPAC30.01C
TI4896S001507	47/F05	-0.69	SPBC1215.02c		N-acetyltransferase complex (non catalytic subunit); interacts physically with SPCC16C4.12; actin-binding protein; involved in mitochondrial inheritance; involved in mitochondrial biogenesis; involved in actin cytoskeletal organization; involved in excluding cofilin from cytoplasmic actin cables; TPR repeat protein (inferred from context); involved in cell polarity
TI4896S004432	02/A03	-0.68	SPAC23A1.08c	rpl34	60S ribosomal protein L34
TI4896S003303	36/F07	-0.68	SPAC57A10.05c	pof1	F-box protein; involved in sulfur metabolism; involved in protein ubiquitination
TI4896S000595	10/H11	-0.68	SPCC777.12c		hypothetical protein; sequence orphan
TI4896S004617	38/H10	-0.68	SPAC637.04		hypothetical protein; ScYGR198W is null lethal; TPR repeat protein
TI4896S003941	27/B01	-0.68	SPAC3F10.16c		GTPase; involved in ribosome biogenesis
TI4896S002104	40/E08	-0.68	SPBC2D10.06	rep1; rec16	DSC1/MBF trancription factor complex; involved in meiotic recombination; involved in DNA repair; zinc finger protein; zf-C2H2 type; involved in start control point of mitotic cell cycle; no apparent orthologs
TI4896S001513	01/A08	-0.68	SPBC83.06c		mitochondrial ribosomal protein L36
TI4896S000952	23/F09	-0.68	SPBC1198.10c		asparagine-tRNA ligase; involved in asparaginyl-tRNA aminoacylation; asparagine-tRNA ligase activity
TI4896S000893	44/H08	-0.68	SPCC1827.03c		long-chain fatty acid transporter; involved in lipid transport
TI4896S002710	24/A11	-0.68	SPBC1289.06c		hypothetical protein
TI4896S004937	04/A11	-0.68	SPAP8A3.01	rpl22; SPAC11E3.15	60S ribosomal protein L22
TI4896S000088	44/D05	-0.67	SPCC794.09c	ef1a-a; tef1-e; ef1a-e	elongation factor 1 (alpha 1 subunit); similar to Sp SPBC839.15C and SPAC23A1.10
TI4896S003493	20/A04	-0.67	SPAC1002.13c	psu1	beta-glucosidase activity; SUN family; involved in cell wall biosynthesis; essential; similar to Sp SPBC2G2.17c; GPI anchored protein; serine/threonine repeat protein; glycoprotein
TI4896S003318	47/F12	-0.67	SPAC20G8.08c		SNF2 family; helicase C-terminal domain; DEAD/DEAH box helicase; similar to Sp SPCC1235.05C and SPAC25A8.01C
TI4896S002688	32/F02	-0.67	SPBC16C6.10	chp2	pleiotrophic transcriptional silencing protein; transcriptional repressor; chromodomain protein; chromo shadow domain; no apparent Sc ortholog; similar to Sp swi6 (paralog)
TI4896S003245	30/H02	-0.67	SPAC4C5.05c	SPAC10F6.01c	sulfite reductase; involved in sulfate assimilation
TI4896S001917	46/G02	-0.67	SPBC365.10		actin-like protein; involved in intracellular protein transport; involved in protein-vacuolar targeting
TI4896S001381	30/G05	-0.67	SPBC651.08c	rpc1	DNA-directed RNA polymerase III
TI4896S003777	30/B05	-0.67	SPAC19A8.08	upf2	involved in the regulation of translation
TI4896S004118	24/C02	-0.67	SPAC6G9.15c		agglutinin-like; sequence orphan
TI4896S002851	19/F03	-0.67	SPAC1639.01c	SPAC806.09c	GNS1/SUR4 family protein; involved in membrane lipid metabolism; similar to Sp SPAC1B2.03c
TI4896S001814	33/F07	-0.67	SPBC16H5.11c	skb1	protein methyltransferase; interacts physically with Shk1p; interacts physically with Orb6p; involved in the regulation of cell morphogenesis; involved in the regulation of mitosis (negative); involved in osmotic stress
TI4896S000811	38/F01	-0.67	SPCC1620.11		nuclear pore complex; similar to Sp SPCC1739.14
TI4896S002672	33/E02	-0.66	SPBC543.04		conserved hypothetical; hypothetical protein; UPF0171
TI4896S001525	03/H03	-0.66	SPBC83.17		yeast mbf1 homolog; transcription factor; multiprotein bridging factor
TI4896S000748	45/B08	-0.66	SPCC1906.03	wtf19; wtf1	wtf element
TI4896S000867	04/F08	-0.66	SPCC965.14c		cytidine and deoxycytidylate deaminase; tRNA-specific adenosine deaminase; involved in tRNA processing; zinc-binding protein
TI4896S000261	24/F04	-0.66	SPCC16C4.18c	taf50	transcription initiation factor TFIID subunit; histone H4-like TAF; interacts with the C-terminal WD repeat-containing region of Taf72p; essential; TAF(II) complex (TBP-associated protein complex); SAGA complex; involved in establishment and/or maintenance of chromatin architectur; involved in transcriptional activation
TI4896S000623	30/D06	-0.66	SPCC417.07c		MT organizer; non-essential; coiled-coil predicted; no apparent orthologs cannot be distinguished; related to spindle components S. pombe Pcp1p and S. cerevisiae Spc110p; involved in the localization of gamma tubulin complex to non SPB MTOCs
TI4896S000034	10/A08	-0.66	SPCC330.05c	ura4	orotidine 5'-phosphate decarboxylase activity; regulated by the SAPK pathway; transcriptionally regulated by glucose
TI4896S003220	01/E04	-0.66	SPAC56F8.13		very hypothetical protein
TI4896S000211	39/B02	-0.66	SPCC1672.07		beta transducin WD repeat protein; U3 snoRNP protein
TI4896S003023	28/B03	-0.66	SPAC22F3.10c	gcs1	glutamate--cysteine ligase; involved in glutathione biosynthesis (1st step); involved in response to cadmium ion; glutamate-cysteine ligase activity
TI4896S000584	18/G06	-0.65	SPCC13B11.04c	SPCC777.01c	glutathione-dependent formaldehyde dehydrogenase
TI4896S003639	48/C01	-0.65	SPAC23C11.15	pst2	transcriptional regulator; sin3 family corepressor; similar to Sp pst1 (paralog); essential; involved in retroelement propagation (required); involved in transcriptional regulation; involved in chromatin silencing; involved in chromatin assembly/disassembly; acetyltransferase complex; involved in histone deacetylation
TI4896S004512	20/E08	-0.65	SPAC2C4.15c		UBX domain
TI4896S000420	30/F02	-0.65	SPCC4B3.04c		hypothetical protein; cyclic nucleic acid binding family protein; patatin-like phospholipase
TI4896S001058	27/G05	-0.65	SPBC428.07	meu6	lysine-rich protein; predicted coiled-coil region; meiotic expression upregulated; NLS (bipartite); pleckstrin homolgy domain; no orthologs
TI4896S000317	25/C01	-0.65	SPCC63.10c		dolichol kinase; involved in N-linked glycosylation
TI4896S002284	22/A04	-0.65	SPBC3B8.10c		protein phosphatase; involved in stress response; NLI interacting factor family
TI4896S001818	32/G03	-0.65	SPBC16H5.07c	ppa2	serine/threonine protein phosphatase; catalytic subunit
TI4896S004356	04/C11	-0.65	SPAC926.01c	stp1; SPAC1071.12c	low molecular weight phosphotyrosine protein
TI4896S003960	07/A07	-0.65	SPACUNK4.11c		hypothetical protein; sequence orphan; predicted coiled-coil region
TI4896S000990	06/D08	-0.65	SPBC1773.02c		thioredoxin peroxidase; AhpC/TSA family; involved in regulation of redox homeostasis; involved in response to oxidative stress; antioxidant activity; involved in de-repression of telomeric silencing
TI4896S002475	25/C10	-0.65	SPBC21C3.15c		aldehyde-dehydrogenase-like
TI4896S004875	21/H07	-0.64	SPAC29A4.04c		TruB family; pseudouridylate synthase activity; PUA domain; involved in rRNA processing
TI4896S004464	09/E08	-0.64	SPAC25B8.10		methyltransferase; tandem duplication
TI4896S000269	14/C05	-0.64	SPCC18B5.05c		involved in thiamine biosynthesis
TI4896S001416	32/A01	-0.64	SPBC27B12.09c		transporter; flavin adenine dinucleotide transporter
TI4896S002304	11/E01	-0.64	SPBC4B4.07c		small nuclear ribonucleoprotein U1-A; involved in mRNA splicing; RNA-binding protein; RRM RNA recognition motif
TI4896S004377	05/D08	-0.64	SPAC2F3.04c		single-stranded DNA-binding protein; involved in mitochondrial DNA replication
TI4896S001684	37/F05	-0.64	SPBC1A4.05		hypothetical protein; sequence orphan; predicted coiled-coil protein
TI4896S002637	16/D01	-0.64	SPBC16G5.08	trp4	phosphoribosylanthranilate transferase; involved in tryptophan biosynthesis
TI4896S004981	11/B12	-0.64	SPAC29B12.06c	rcd1	RNA-binding protein; involved in nitrogen starvation-induced sexual development (required); negatively regulates differentiation
TI4896S002245	31/H02	-0.63	SPBC25H2.01c	gar1; SPBC20F10.01	small nucleolar ribonucleoprotein complex; involved in rRNA processing; RNA-binding protein
TI4896S003523	09/C12	-0.63	SPAC140.01	sdh2	succinate dehydrogenase (ubiquinone); iron-sulfur protein subunit; involved in tricarboxylic acid cycle; involved in mitochondrial electron transport, succinate to ubiquinone; involved in succinate metabolism
TI4896S000065	29/B04	-0.63	SPCC1235.10c	sec6	involved in secretory pathway; involved in exocytosis
TI4896S000028	09/E01	-0.63	SPCC613.11c	meu23	Sp specific families; B13958 domain; meiotic expression upregulated; repeat containing; predicted coiled-coil
TI4896S004482	35/H01	-0.63	SPAC1F7.02c		DEAD/DEAH box helicase; ATP-dependent; RNA helicase
TI4896S000084	06/D10	-0.63	SPCC794.14c		hypothetical protein; transposon?
TI4896S003783	39/C06	-0.63	SPAC19A8.02		hypothetical protein involved in transcriptional activation; pleckstrin homology domain; possibly protein kinase interacting
TI4896S002314	31/G04	-0.63	SPBC2G2.05	rpl16c	60S ribosomal protein L13/L16; similar to Sp rpl1601 and rpl1602
TI4896S002471	20/E01	-0.63	SPBC21C3.11		UBX domain
TI4896S001597	06/D05	-0.63	SPBC11G11.04	trs20	TRAPP; Sedlin subfamily; involved in intracellular protein transport; human disease X-linked spondyloepiphyseal dysplasia tarda ortholog; similar to S. cerevisiae YBR254C
TI4896S000727	14/E04	-0.63	SPCC18.07	rpc53	DNA directed RNA polymerase III subunit
TI4896S004147	30/A07	-0.63	SPAC26A3.10		ADP-ribosylation factor; GTPase activating protein; ArfGap domain; pleckstrin homology domain; similar to Sp csx2; no apparent Sc ortholog
TI4896S002343	44/H07	-0.63	SPBC1105.07c		conserved eukaryotic protein; PINT/PCI domain
TI4896S000155	19/D06	-0.63	SPCC4G3.16		drap deaminase; involved in riboflavin biosynthesis; RLU family pseudouridine synthase
TI4896S001606	09/B05	-0.63	SPBC18H10.07		small nuclear ribonucleoprotein; no apparent Sc ortholog
TI4896S000035	04/C12	-0.63	SPCC330.06c	pmp20	peroxisomal membrane protein Pmp20p, Ahpc-TSA family
TI4896S003931	26/B09	-0.62	SPAC3F10.06c		initiator tRNA phosphoribosyl transferase
TI4896S000409	47/B12	-0.62	SPCC4B3.15	dmf1; mid1	involved in cytokinesis (required); involved in septation (required); expression peaks at M-G1 phase; regulated by PBF transcription complex; involved in contractile ring positioning; non-essential; pleckstrin homology domain; no apparent orthologs
TI4896S000126	03/H07	-0.62	SPCC1682.01	qcr9	ubiquinol cytochrome c reductase complex subunit (cytochrome bc1 complex); respiratory complex III
TI4896S002892	38/A11	-0.62	SPAC630.05		TBC domain protein; GTPase activating protein of Rab-like GTPase
TI4896S001163	33/D02	-0.62	SPBC119.08	pmk1; spm1	serine/threonine protein kinase; MAP kinase (MAPK); regulates cell integrity; functions coordinately with the protein kinase C pathway; stress-activated; regulates morphogenesis; involved in cell wall biosynthesis
TI4896S003679	37/B04	-0.62	SPAC4G9.04c		polyadenylation factor
TI4896S003411	42/A01	-0.62	SPAP27G11.13c		small nuclear ribonucleoprotein complex; involved in rRNA modification; involved in 35S primary transcript processing; direct rRNA pseudouridinylation
TI4896S004859	35/G01	-0.62	SPAC29A4.20		RNA polymerase II holoenzyme component; histone acetyltransferase
TI4896S003596	18/B09	-0.62	SPAC3C7.02c		conserved hypothetical; hypothetical protein; similar to Sp meu14 and SPCC736.02c
TI4896S000764	51/D06	-0.62	SPCC1739.15	wtf21; wtf3	wtf element; no apparent orthologs
TI4896S000908	26/H03	-0.62	SPCP1E11.11		conserved hypothetical; RNA-binding protein; pumilio family
TI4896S003224	35/B10	-0.62	SPAC22A12.01c	SPAC56F8.17c	damaged DNA binding activity; involved in DNA repair and double-strand break repair
TI4896S001882	31/A12	-0.61	SPBC21D10.09c		zinc finger protein; zf-C3HC4 type (RING finger); ubiquitin ligase (E3)
TI4896S000805	44/F11	-0.61	SPCC1620.05		Rab geranylgeranyltransferase (alpha subunit)
TI4896S000714	37/B05	-0.61	SPCC74.09		RNA-binding protein; rrm RNA recognition motif (4); similar to Sp nrd1 (paralog)
TI4896S002173	26/G10	-0.61	SPBC1778.10c	SPBC4C3.11	phosphoinositide-dependent protein kinase 1; serine/threonine protein kinase; PKC subfamily; similar to Sp ksg1 (paralog)
TI4896S003485	37/E11	-0.61	SPAC1002.05c		zinc finger protein; zf-C5HC2 type; jmjC domain; jmjN domain; DNA-binding protein; ARID DNA domain; similar to retinoblastoma binding proteins; involved in transcriptional regulation
TI4896S001759	21/D12	-0.61	SPBC1711.08		stress-regulated co-chaperone; activator of Hsp90p; interacts physically with Swo1p; conserved eukaryotic protein
TI4896S004232	16/F06	-0.61	SPAC17A2.04c		TPR repeat protein; HSP chaperone complex
TI4896S004993	38/G08	-0.61	SPAC1039.05c		fungal conserved protein; zinc finger protein; zf-C2H2 type; similar to Sp zas1 (paralog)
TI4896S001106	38/D05	-0.61	SPBC354.09c		protease peptidase family M28; similar transferrin receptor protein; PA (protease associated) domain; non-essential
TI4896S001897	51/G10	-0.61	SPBC12C2.14c		very hypothetical protein
TI4896S002567	12/E11	-0.60	SPBC215.10		conserved hypothetical; conserved protein; DUF003; no apparent Sc ortholog
TI4896S004198	24/E09	-0.60	SPAC328.02		zinc finger protein; zf-C3HC4 type (RING finger); ubiquitin ligase (E3); TRIAD composite zinc finger domain; Ariadne-2-like (which is a ubiquitin conjugating enzyme e2-binding protein); IBR domain
TI4896S000050	24/F05	-0.60	SPCC320.08		DUF6; no apparent Sc ortholog
TI4896S003346	36/C04	-0.60	SPAC9.10		amino acid permease family; similar to Sp SPBC15C4.04C and SPAPB24D3.02C and SPCC74.04 and SPAC1039.01 and SPAC11D3.08C and SPCC584.13 and SPCC794.03
TI4896S000476	37/G05	-0.60	SPCC1322.14c		polyphosphate synthetase; 3 predicted transmembrane helices; involved in vacuole fusion (non-autophagic)
TI4896S003082	23/G06	-0.60	SPAC2G11.10c		molybdopterin synthase sulfurylase
TI4896S003238	27/C11	-0.60	SPAC22A12.15c	bip1; bip	resident luminal ER protein; essential; heat shock protein 70 family; involved in assembly of multimeric complexes in the ER; interacts physically with Cnx1p
TI4896S000102	47/D01	-0.60	SPCC553.03		AAA family ATPase; involved in peroxisome organization and biogenesis
TI4896S000179	30/E09	-0.59	SPCC970.09	sec8	involved in secretory pathway, exocytosis, cytokinesis, cell separation
TI4896S002709	42/C02	-0.59	SPBC1289.05c	vma10	vacuolar ATP synthase (subunit G); V-type ATPase (G subunit); vacuolar proton pump component
TI4896S004243	13/H11	-0.59	SPAC17G6.02c		involved in sphingoid long-chain base release
TI4896S004861	23/C03	-0.59	SPAC29A4.18		WD repeat protein; involved in chromatin assembly/disassembly; involved in transcriptional regulation; involved in chromatin silencing; acetyltransferase complex; involved in histone deacetylation; similar to Sp SPCC1672.10
TI4896S002734	49/C08	-0.59	SPBPB2B2.06c		putative 5' nucleotidase family protein; calcineurin-like phosphodiesterase; similar to Sp SPAC1039.02 and SPAC17G6.03
TI4896S001567	40/C08	-0.59	SPBC19C2.07	fba1	fructose-bisphosphate aldolase; involved in glycolysis; fructose-bisphosphate aldolase activity
TI4896S001277	29/E06	-0.59	SPBC146.14c	sec26; SPBC337.01c	adaptin; coatomer (beta subunit); the coatomer is a cytosolic protein complex that binds to dilysine motifs and reversibly associates with Golgi non- clathrin-coated vesicles, which further mediate biosynthetic protein transport from the ER, via the Golgi up to the trans Golgi network; Coatomer complex is required for budding from Golgi membranes, and is essential for the retrograde Golgi-to-ER t…
TI4896S000414	27/C04	-0.59	SPCC4B3.10c	ipk1	inositol 1,3,4,5,6-pentakisphosphate (IP5) kinase
TI4896S004806	07/D08	-0.59	SPAC1952.08c		conserved hypothetical protein; possibly involved in RNA processing from Sc 2-hybrid data
TI4896S000204	36/E11	-0.59	SPCC962.06c	bpb1; sf1	zinc finger protein; zf-CCHC type (zinc knuckle); involved in mRNA splicing; SF1-U2AF(59)-U2AF(23) complex; KH domain; involved in pre-spliceosome formation
TI4896S004162	24/G07	-0.59	SPAC8E11.01c	SPAC959.01	glycosyl hydrolase family 32; invertase
TI4896S004305	10/A12	-0.59	SPAP7G5.01	SPAC15E1.10	hypothetical protein; sequence orphan
TI4896S000053	27/D07	-0.59	SPCC320.05		sulfate transporter
TI4896S004960	25/F03	-0.59	SPAC4D7.10c		sequence orphan; hypothetical protein
TI4896S002707	40/B10	-0.59	SPBC1289.03c	spi1	small GTPase; Ras family; GTP-binding protein; involved in mitosis (required); involved in interphase transition (required); involved in nuclear-cytoplasmic transport; involved in cell cycle progression; involved in DNA replication; involved in chromosome segregation; overexpression rescues pim1 mutant; deletion mutant results in genome instability; interacts physically with Pim1p; interacts phys…
TI4896S004523	48/H03	-0.58	SPAC27F1.01c	SPAC25G10.09c	actin cortical patch component; predicted coiled-coil region; EF hand motif; calcium binding protein; involved in actin cytoskeletal organization; involved in endocytosis; divergent repeat-containing; involved in actin cortical patch assembly; WH2 motif; similar to Sp SPBC800.10C and SPBC83.01; target of Ark1/Prk1 family kinases (potential)
TI4896S000927	16/F07	-0.58	SPBC359.04c		Sp specific families; glycoprotein; serine/threonine-ric; similar to Sp SPAC186.01 and SPBC947.04
TI4896S003028	09/F10	-0.58	SPAC22F3.05c	alp41	ADP-ribosylation factor; GTP-binding protein; essential for co-factor dependent biogenesis of microtubules
TI4896S003791	14/H04	-0.58	SPAC23H3.08c	bub3	experimentally characterised; spindle assembly checkpoint component; WD repeat protein
TI4896S000650	39/E01	-0.58	SPCC1450.11c	cek1	Ser/Thr protein kinase Cek1 serine/threonine protein kinase; overexpression suppresses anaphase blocking mutation cut8
TI4896S004672	37/C12	-0.58	SPAC144.15c		hypothetical protein; sequence orphan
TI4896S002651	23/G04	-0.58	SPBC16A3.18		hypothetical protein; rrm RNA recognition motif; RNA-binding protein; similar to Sp SPAC12G12.03c
TI4896S002995	18/E01	-0.58	SPAC3H8.10	spo20; sec14	CRAL/TRIO domain; required for transport of secretory proteins from the Golgi complex; Catalyzes the transfer of phosphatidylinositol and phosphatidylcholine between membranes in vitro; essential for viability and secretion;has a direct role in controlling cell septation and in forespore membrane formation
TI4896S004577	24/E04	-0.58	SPAC9E9.09c		aldehyde dehydrogenase
TI4896S004655	46/H10	-0.58	SPAC30C2.07		Sp specific families; glycoprotein serine-rich; possibly Sp specific
TI4896S002459	04/E03	-0.58	SPBC31F10.17c		hypothetical protein; sequence orphan
TI4896S000501	13/B06	-0.58	SPCC1281.02c	spf30	spliceosome associated protein (implicated); Tudor domain (SMART); involved in mRNA splicing; no apparent Sc ortholog
TI4896S001683	09/B11	-0.58	SPBC1A4.04		hypothetical protein; sequence orphan
TI4896S004622	26/C11	-0.57	SPAC637.09		ribonuclease H
TI4896S003165	23/H06	-0.57	SPAC139.05		succinate semialdehyde dehydrogenase; involved in glutamate metabolism, tyrosine metabolism; similar to Sp SPAC1002.12C (paralog)
TI4896S000151	11/C01	-0.57	SPCC306.11		sequence orphan; hypothetical protein
TI4896S001965	45/A01	-0.57	SPBC6B1.08c		histone acetyltransferase complex; 2 OG-Fe(II) oxygenase superfamily
TI4896S000202	05/B09	-0.57	SPCC962.04	rps1201; rps12; rps12-1	40S ribosomal protein S12
TI4896S001371	40/G10	-0.57	SPBC725.16	sct1; res1	DSC1/MBF trancription factor complex; partner of Cdc10p transcription factor; ankyrin repeat protein; APSES domain; DNA-binding protein; regulator of mitotic cell cycle (positive); Mlu1-box binding factor (MBF); involved in transcriptional activation; involved in control of start (required); involved in control of mitosis; similar to Sp SPBC336.12c and SPAC22F3.09c
TI4896S000185	12/E03	-0.57	SPCC970.03		NADH-cytochrome b5 reductase
TI4896S000134	43/G12	-0.57	SPCC1682.09c		mitochondrial carrier; involved in mitochondrial transport; unknown specificity
TI4896S003046	26/G11	-0.57	SPAC22G7.05		involved in ribosome biogenesis and assembly; predicted coiled-coil protein; interacts physically with Mis3p
TI4896S003099	32/B10	-0.57	SPAC23G3.07c		hypothetical protein; sequence orphan
TI4896S001533	26/C10	-0.57	SPBC27.03	meu25	meiotic expression upregulated; no apparent orthologs
TI4896S000040	30/E11	-0.57	SPCC330.11		BTB domain; ankyrin repeat protein; regulator of condensation
TI4896S001349	12/C07	-0.57	SPBC4.01		hypothetical protein; sequence orphan
TI4896S002419	32/D10	-0.57	SPBP8B7.32c	puc1; SPBC19F5.01c	G1-type cyclin; involved in exit from the mitotic cycle
TI4896S003763	21/E12	-0.57	SPAC6B12.15	cpc2; rkp1	guanine nucleotide regulatory protein; WD repeat protein; mammalian RACK1 homolog; phosphorylated by Ran1p; involved in conjugation; involved in sporulation; involved in actin cytoskeletal organization; protein kinase C-Pck2-signaling pathway; interacts with pleckstrin homology domain to modulate Pck2-mediated signaling process
TI4896S005021	05/F12	-0.56	SPAC186.06		hypothetical protein
TI4896S000909	07/B01	-0.56	SPCC24E4.01	ade5; ade8; SPCC569.08c	glycinamide ribonucleotide transformylase; glycinamide ribonucleotide transformylase; involved in purine biosynthesis
TI4896S003849	38/G12	-0.56	SPAC7D4.03c		hypothetical protein; sequence orphan
TI4896S002699	46/H08	-0.56	SPBC1539.05		Golgi transport complex subunit predicted; Sec34-like family; involved in intracellular protein transport; involved in secretory pathway; involved in retention of proteins in the Golgi apparatus; involved in ER to Golgi transport; involved in retrograde transport; similar to S. cerevisiae YER157W
TI4896S004724	38/H06	-0.56	SPAC22F8.05		alpha,alpha-trehalose-phosphate synthase; glycosyl transferase family 20; similar to Sp SPACUNK4.16c (paralog)
TI4896S003195	23/E06	-0.56	SPAC1A6.10	SPAC30D11.15c	Moeb/ThiF domain
TI4896S004976	31/A05	-0.56	SPAC29B12.01	SPAC3G6.12	SNF2 family; helicase C-terminal domain; DEAD/DEAH box helicase
TI4896S002260	35/B07	-0.56	SPBC17D11.06	pri2	DNA primase (large subunit); involved in telomere maintenance
TI4896S002389	09/H01	-0.56	SPBP8B7.02		predicted coiled-coil region; sequence orphan
TI4896S002819	48/C04	-0.56	SPAC13G6.01c	rad8; SPAC5H10.14c	zinc finger protein; zf-C3HC4 type (RING finger); ubiquitin ligase (E3); SNF2 family; DEAD/DEAH box helicase; involved in DNA repair; helicase C-terminal domain; involved in nucleotide-excision repair
TI4896S004692	26/A02	-0.56	SPAC458.02c		involved in mitosis; involved in cytokinesis; involved in meiosis; involved in spindle assembly
TI4896S000263	49/C07	-0.56	SPCPJ732.02c		xylulose kinase; FGGY family
TI4896S001061	38/B03	-0.56	SPBC428.10		hypothetical protein; sequence orphan; non-essential
TI4896S002132	08/G04	-0.56	SPBC15D4.13c		hypothetical protein; sequence orphan
TI4896S003442	14/C10	-0.55	SPAC664.01c	swi6; SPAC824.10c	involved in mating-type switching (required); silent heterochromatin component; involved in chromosome segregation (required); involved in chromosome cohesion (required); involved in centromere function; involved in the association of Rad26p with centromeres (required); deletion mutant results in lagging chromosomes at mitosis at reduced temperature (frequent); chromodomain protein; binds centrom…
TI4896S000338	47/B07	-0.55	SPCC24B10.01	cdc21; mcm4; SPCC16A11.17	MCM complex subunit; involved in DNA replication (initiation) (required)
TI4896S004966	18/G08	-0.55	SPAC3G6.03c		Maf-like protein; involved in cytokinesis; involved in septum formation (regulation) (negative); involved in septation
TI4896S000993	40/C09	-0.55	SPBC1773.05c	tms1	dehydrogenase; sorbitol dehydrogenase; suppresses growth arrest induced by a p53 tumour mutant; monoclonal antibodies
TI4896S001469	49/D03	-0.55	SPBC691.02c	pi034; SPACTOKYO_453.01	Rad50p interacting protein; similar to human RINT-1 (a Rad50 interacting protein which participates in radiation induced checkpoint control); no apparent Sc ortholog
TI4896S001526	11/G07	-0.55	SPBC83.18c		conserved hypothetical protein; C2 domain
TI4896S000368	07/H11	-0.55	SPCC1795.10c		conserved hypothetical protein
TI4896S001860	22/C10	-0.55	SPBC19G7.16		conserved hypothetical protein; predicted coiled-coil region
TI4896S000704	08/B02	-0.55	SPCC737.01c	SPCC297.06c	hypothetical protein; sequence orphan; predicted coiled-coil
TI4896S000890	16/H11	-0.55	SPCC1827.08c	pof7; SPCC70.11c	F-box protein
TI4896S001265	10/A07	-0.55	SPBC146.02		hypothetical protein; sequence orphan
TI4896S001117	09/C09	-0.54	SPBC839.03c		DUF298; Sc YLR128W (homolog) is possibly involved in cell polarity (computational interaction map)
TI4896S002298	20/F11	-0.54	SPBC4B4.01c		pantothenate kinase; fumble domain; implicated in membrane synthesis
TI4896S002189	31/C11	-0.54	SPBC405.07	rpl3602; rpl36; rpl36-2	60S ribosomal protein L36; similar to Sp rpl3601
TI4896S001647	29/H02	-0.54	SPBC3H7.03c		2-oxoglutarate dehydrogenase (lipoamide) (e1 component of oxoglutarate dehydrogenase complex); involved in 2-oxoglutarate metabolism; involved in tricarboxylic acid cycle; oxoglutarate dehydrogenase (lipoamide) activity
TI4896S005012	19/F07	-0.54	SPAC869.04		formamidase-like protein; no apparent Sc ortholog
TI4896S001314	45/F04	-0.54	SPBC1709.06		dihydrouridine synthase; involved in tRNA modification
TI4896S001244	39/F10	-0.54	SPBC646.12c	src1; sar1; gap1	GTPase-activating protein; GTPase-activating protein; no apparent Sc ortholog
TI4896S002829	44/G04	-0.54	SPAC13G6.11c		putative mevalonate kinasemevalonate kinase; involved in ergosterol biosynthesis
TI4896S004060	48/F01	-0.54	SPAC688.08		RNA polymerase II holoenzyme component
TI4896S004927	52/B09	-0.54	SPAC11E3.05		WD repeat protein; RWD domain; coronin homolog
TI4896S003236	42/B07	-0.54	SPAC22A12.13		human downs syndrome critical region-like
TI4896S001749	27/D03	-0.54	SPBC23G7.13c		urea transporter
TI4896S001312	11/A01	-0.54	SPBC1709.04c	cyp3	cyclophilin; U-snRNP-associated; involved in mRNA splicing; peptidyl-prolyl cis-trans isomerase; functional ortholog of human USA-Cyp; no apparent Sc ortholog
TI4896S004055	11/A09	-0.54	SPAC688.02c		spindle pole body component; involved in chromosome segregation
TI4896S003781	27/A08	-0.54	SPAC19A8.04		cytochrome p450; involved in lipid, fatty acid or sterol metabolism
TI4896S000073	51/D11	-0.54	SPCC548.03c	wtf4; wtf13	pseudogene; wtf element
TI4896S003406	14/B02	-0.54	SPAP27G11.09c		GTP cyclohydrolase; involved in riboflavin biosynthesis
TI4896S000837	29/C07	-0.53	SPCC1919.12c		protease
TI4896S001599	07/C01	-0.53	SPBC11G11.06c	sme1	small nuclear ribonucleoprotein E; involved in mRNA splicing
TI4896S000680	23/F11	-0.53	SPCC285.11		ubiquitin-regulatory protein; UBX domain
TI4896S002142	44/G11	-0.53	SPBC13E7.08c		proteasome interacting protein; involved in regulation of transcription elongation; RNA polymerase II associated Paf1 complex
TI4896S000771	06/C07	-0.53	SPCC576.03c		thioredoxin peroxidase
TI4896S000377	13/A10	-0.53	SPCC895.02	mad3; SPCC1795.01c	spindle assembly checkpoint component; required for Mad2p to inhibit the anaphase-promoting complex
TI4896S003288	39/B11	-0.53	SPAC6F12.09		putative RNA-directed rna polymerase RNA-directed RNA polymerase; involved in RNA interference; involved in PTGS; involved in the regulation of chromatin silencing at the centromere; involved in the regulation of histone L9 methylation; no apparent Sc ortholog
TI4896S003949	33/E03	-0.53	SPAC8F11.07c	cdc24	involved in DNA replication (required); essential; no apparent orthologs
TI4896S004792	43/B04	-0.53	SPAC1B3.11c	ypt4	small GTPase; Ypt subfamily; no apparent Sc ortholog
TI4896S000697	17/E08	-0.53	SPCC1223.11	ptc2	serine/threonine protein phosphatase; involved in regulation of osmolarity; protein phosphatase 2C family involved in mRNA splicing (implicated); similar to Sp ptc3 (paralog)
TI4896S000882	43/D05	-0.53	SPCC70.04c		sequence orphan; hypothetical protein
TI4896S004760	38/D07	-0.53	SPAC19B12.01	SPAC4F10.21	hypothetical protein; TPR repeat protein
TI4896S000178	37/D01	-0.53	SPCC970.10c		zinc finger protein; zf-C3HC4 type (RING finger); E3 ubiquitin ligase; similar to Sp SPCC1919.15; involved in ubiquitination; involved in histone H2B monoubiquitination
TI4896S004178	49/E11	-0.53	SPAC3H5.08c		WD repeat protien
TI4896S004184	06/F10	-0.53	SPAC3A11.13	SPAC3H5.02	prefoldin (subunit 6)
TI4896S002941	40/H10	-0.52	SPAC24H6.03	pcu3	cullin family
TI4896S003077	46/E08	-0.52	SPAC2G11.05c		hypothetical coiled-coil protein; BRO1-like domain; involved in signal transduction; similar to A. nidulans pala; MAP kinase pathway
TI4896S004628	31/A07	-0.52	SPAC12B10.01c	SPAC31F12.02c; SPAC637.15c	DEAD/DEAH box helicase
TI4896S003210	30/H11	-0.52	SPAC56F8.02		AMP binding enzyme; similar to Sp SPAC22F3.04
TI4896S000635	01/H05	-0.52	SPCC191.07	cyc1	cytochrome c
TI4896S003873	38/E01	-0.52	SPAC644.12	cdc5	transcriptional regulator; Myb family; DNA binding protein; essential; involved in mRNA splicing (required); 40S snRNP-containing complex; involved in G2/M phase progression (required); depletion causes accumulation of unspliced mRNAs; involved in nuclear division (required); nineteen complex (Ntc); interacts physically with Cwf8p (residues 443-515); interacts physically with Cwf1p
TI4896S001083	23/H08	-0.52	SPBC1685.06	cid11	cid1-related; nucleotidyltransferase; DNA polymerase kappa; caffeine induced death protein; similar to Sp SPAC821.04c and cid1 (paralogs); no apparent Sc ortholog; deletion mutant sensitive to caffeine; deletion mutant sensitive to HU
TI4896S003700	45/D03	-0.52	SPAC13G7.05		acyl-coA-sterol acyltransferase
TI4896S002281	37/C05	-0.52	SPBC3B8.12	SPBC11C11.11c	DEAD/DEAH box helicase
TI4896S002559	07/B07	-0.52	SPBC215.02	bob1	prefoldin; interacts physically with Byr1p; regulator of sexual differentiation
TI4896S000708	10/A10	-0.52	SPCC737.05		pex24 family
TI4896S000978	31/D01	-0.52	SPBC800.04c	rpl4301; rpl43; rpl43-1; rpl37a-1	KOW motif
TI4896S004866	08/D05	-0.52	SPAC29A4.13		urease accessory protein; no apparent Sc ortholog
TI4896S003429	22/F11	-0.52	SPAC343.15		tRNA isopentenyltransferase
TI4896S000496	03/D05	-0.51	SPCC338.06c		heat shock protein; Hsp20 family; similar to Sp hsp16
TI4896S000475	34/G10	-0.51	SPCC1322.13	ade6; min1	phosphoribosylaminoimidazole carboxylase; AIR carboxylase; involved in purine biosynthesis
TI4896S004585	34/F06	-0.51	SPAC17C9.16c	SPAC9E9.16	membrane transporter; unknown specificity; similar to Sp SPBC609.04 (paralog)
TI4896S003683	48/D03	-0.51	SPAC4G9.08c	rpc2	DNA-directed RNA polymerase III complex (130 kD subunit)
TI4896S002911	38/G05	-0.51	SPAC31A2.07c		DEAD/DEAH box helicasw; ATP-dependent; RNA helicase
TI4896S000989	26/G05	-0.51	SPBC1773.01		WD repeat protein; striatin; involved in cell cycle progression; human ortholog is expressed mainly in S and G phase; possibly binds calmodulin
TI4896S000781	07/E02	-0.51	SPCC576.13		conserved hypothetical protein
TI4896S004921	08/D12	-0.51	SPAC2H10.02c		PDZ domain protein; similar to 26s proteasome regulatory subunit p27
TI4896S001849	48/H01	-0.51	SPBC19G7.05c	cps1; drc1; bgs1	1,3-beta-D-glucan synthase subunit; glycosyl transferase family 48; involved in septation; involved in cell polarity (maintenance); involved in conjugation; involved in spore wall assembly; involved in spore germination; involved in cell wall biosynthesis; mutation confers hypersensitivity to cyclosporin A and papulacandin B; regulator of DNA replication; phosphorylated by CDK; similar to Sp SPCC…
TI4896S002930	46/C06	-0.51	SPAC23E2.03c	ste7	required for mating and meiosis; involved in conjugation (required); involved in meiosis (required); no apparent orthologs
TI4896S001247	21/B03	-0.51	SPBC646.15c		hypothetical protein; sequence orphan
TI4896S004469	08/E01	-0.51	SPAC25B8.15c		conserved hypothetical protein
TI4896S003762	04/C03	-0.51	SPAC6B12.14c		hypothetical protein
TI4896S004598	10/E11	-0.51	SPAC17C9.02c	lys7	alpha-aminoadipate reductase-phosphopantetheinyl transferase; involved in lysine biosynthesis (6th step); ACPS domain
TI4896S003277	28/C09	-0.51	SPAC1565.05		hypothetical protein; sequence orphan; predicted coiled-coil region
TI4896S002594	18/A11	-0.51	SPBC56F2.03		actin-like protein
TI4896S003644	20/H10	-0.51	SPAC13F5.03c		glycerol dehydrogenase; bacterial-like; no apparent Sc ortholog
TI4896S003707	21/C01	-0.51	SPAC13G7.12c		choline kinase
TI4896S003900	32/D12	-0.50	SPAC6F6.15	ypt5	small GTPase; Rab subfamily; GTP-binding protein; post-translational modification, gerenylgerenylation @ C-terminal CXC; post-translational modification, carboxymethylation; involved in regulation of endosome fusion, the regulation of intracellular protein transport; functionally complemented by mammalian rab5; non-essential
TI4896S000487	35/G10	-0.50	SPCC338.16	pof3	F-box protein; TPR repeat protein; involved in genome integrity (required) and telomere maintenance (required)
TI4896S003085	25/F02	-0.50	SPAC2G11.13		membrane transporter; unknown specificity
TI4896S000947	06/G11	-0.50	SPBC1198.05		guanylate kinase
TI4896S000416	07/F01	-0.50	SPCC4B3.08		hypothetical protein; sequence orphan
TI4896S002868	11/F12	-0.50	SPAC18B11.07c	ubc2; rhp6	ubiquitin conjugating enzyme; functional ortholog of Sc RAD6; involved in DNA repair; involved in chromatin remodelling; required for caffeine-mediated override of checkpoint controls; involved in the regulation of transcriptional silencing of heterochromatin; involved in transcriptional silencing of the mating-type region; overexpression derepressed transcriptional silencing of the mating-type r…
TI4896S001457	34/A10	-0.50	SPBC8D2.20c	sec31	COPII-coated vesicle component; WD repeat protein; involved in intracellular protein transport; involved in secretory pathway (required); involved in cell cycle progression (required)
TI4896S000529	12/H05	-0.50	SPCC61.02	spt3	transcriptional regulator; SAGA complex (Spt-Ada-Gcn5-Acetyltransferase); transcription factor TFIID (18 kD subunit)
TI4896S000622	27/B04	-0.50	SPCC417.06c		serine/threonine protein kinase; similar to Sp SPAC24B11.11c (paralog)
TI4896S002395	17/A09	-0.50	SPBP8B7.08c		leucine carboxyl methyltransferase; involved in protein modification
TI4896S001021	49/E02	-0.50	SPBC1271.02	stt3	oligosaccharyltransferase subunit; functional homolog of Sc YGL022W; involved in glycosylation; involved in the regulation of oligosaccharyltransferase activity; essential
TI4896S001038	13/E11	-0.49	SPBC106.16		20S proteasome component (alpha 4); involved in ubiquitin-dependent proteolysis; proteasome endopeptidase activity
TI4896S002393	31/D03	-0.49	SPBP8B7.06	rpp201; rpp2; rpp2-1	60s acidic ribosomal protein (P2A subunit); similar to Sp SPBC23G7.15C and SPAC1071.08
TI4896S003122	15/F07	-0.49	SPAC1687.12c	coq4	involved in ubiquinone biosynthesis
TI4896S003862	13/B01	-0.49	SPAC4F8.03	SPAC644.01c	conserved hypothetical; hypothetical protein; UPF0023 family
TI4896S000725	34/H09	-0.49	SPCC18.05c		conserved hypothetical; WD repeat protein; notchless-like
TI4896S003856	05/C02	-0.49	SPAC4F8.10c		calponin family; involved in actin cytoskeletal organization
TI4896S004038	16/F09	-0.49	SPAC16A10.04	rho4	Rho family; small GTPase; similar to Sp SPAC20H4.11c (paralog); non-essential; involved in cellular morphogenesis; involved in cytokinesis; involved in septation; involved in regulation of the actin cytoskeleton; involved in cell wall organization and biogenesis (IGI)
TI4896S000778	18/E08	-0.49	SPCC576.10c	rpt3	19S proteasome regulatory subunit; AAA family ATPase
TI4896S001446	31/D05	-0.49	SPBC8D2.09c		U2 b'-like spliceosomal protein; U2 snRNA-associated protein; involved in mRNA splicing; rrm RNA recognition motif; RNA-binding protein
TI4896S004417	20/F03	-0.49	SPAC19G12.08		fatty acid hydroxylase; involved in the hydroxylation of the very long chain fatty acid (VLCFA)
TI4896S004032	01/F10	-0.49	SPAC24C9.13c		mitochondrial ribosomal protein (small subunit)
TI4896S004507	07/A08	-0.49	SPAC2C4.10c		hypothetical protein; sequence orphan
TI4896S001760	11/H07	-0.49	SPBC1711.09c		conserved hypothetical protein
TI4896S004638	49/B07	-0.49	SPAC12B10.11	exg2	glycosyl hydrolase family 5; exo-1,3-beta-d-glucanohydrolase
TI4896S000709	18/C07	-0.48	SPCC737.06c		Aldo/keto reductase; no Sc ortholog
TI4896S001916	12/F11	-0.48	SPBC365.09c		conserved hypothetical; zinc finger protein; zf-C2H2 type
TI4896S004814	28/D06	-0.48	SPAC1952.16		FCH domain; RhoGAp (GTPase activator towards Rho/Rac/Cdc42-like small GTPases); Fes/CIP4 homology domain; similar to Sp SPAC2F7.18C
TI4896S003664	16/G05	-0.48	SPAC18G6.07c	mra1	downstream factor of Ras; involved in cell growth (required); involved in conjugation (required); involved in ribosome biogenesis and assembly
TI4896S003197	12/B08	-0.48	SPAC30D11.13	hus5; ubc9	experimentally characterised; ubiquitin conjugating enzyme; involved in mitosis (required); interacts physically with Rad51p; SUMO conjugator; involved in S phase arrest recovery (required)
TI4896S004695	28/F06	-0.48	SPAC458.05	vps34	phosphatidylinositol 3-kinase; involved in stress response (implicated); class D vps; essential; involved in cell growth (required); involved in vacuole organization and biogenesis; involved in sporulation; involved in conjugation; involved in prospore membrane formation
TI4896S000045	18/C05	-0.48	SPCC320.13c	ark1; SPCC330.16	serine/threonine protein kinase; aurora homolog; involved in spindle assembly checkpoint; involved in spindle formation (required); involved in sister chromatid separation (required); involved in microtubule attachment (required); interacts physically and/or genetically with the inner centromere protein Pic1p; interacts physically and/or genetically with the inner centromere protein Bir1p; intera…
TI4896S000154	06/E12	-0.48	SPCC4G3.17		HD domain; metal dependent phosphohydrolase
TI4896S003768	38/D10	-0.48	SPAC32A11.02c		hypothetical protein; sequence orphan; predicted coiled-coil region
TI4896S002016	21/B02	-0.47	SPBC685.03		hypothetical serine-rich protein
TI4896S000938	35/C11	-0.47	SPBC1683.09c	frp1	ferric reductase transmembrane component; similar to Sp SPBC947.05C
TI4896S004632	37/B03	-0.47	SPAC12B10.05		metallopeptidase
TI4896S003859	03/G09	-0.47	SPAC4F8.06		mitochondrial ribosomal protein S12
TI4896S003842	10/F07	-0.47	SPAC7D4.09c		involved in cell polarity
TI4896S003562	27/G07	-0.47	SPAC767.01c	vps1; SPAC9G1.14c	dynamin family; GTPase; involved in intracellular protein transport
TI4896S003537	30/A09	-0.47	SPAC3H1.02c		zinc metallopeptidase; peptidase family M16
TI4896S000875	45/H05	-0.47	SPCC1494.06c		DEAD/DEAH box helicase; ATP-dependent; RNA helicase
TI4896S003958	21/D04	-0.47	SPACUNK4.13c		GTP-binding protein; GTP1/OBG family
TI4896S002527	08/H06	-0.47	SPBC26H8.06		arsenate reductase (glutaredoxin) activity; glutaredoxin; PICOT domain
TI4896S000069	34/E03	-0.47	SPCC1235.14	ght5	hexose transporter; similar to Sp GHT1 and GHT2 and GHT4 and GHT3 and GHT6 and SPCC548.06C and SPBC1348.14C; tandem duplication
TI4896S004721	17/F02	-0.47	SPAC22F8.02c		PvGal biosynthesis protein Pvg5; predicted N-terminal signal sequence; involved in cell wall biosynthesis; deletion mutant galactomannans deficient for pyruvylated galactose-beta-1,3-galactose-alpha-1,2-pyruvate (PvGal); no apparent orthologs; Sp specific families
TI4896S003673	05/E01	-0.47	SPAC13D6.02c	byr3	zinc finger protein; zf-CCHC type (zinc knuckle); involved in mating pheromone recognition pathway; deletion mutant results in conjugation defects; involved in conjugation; cellular nucleic acid binding protein homolog; overexpression suppresses sporulation defects of ras1 mutant
TI4896S000130	27/B11	-0.46	SPCC1682.05c		TPR repeat protein; localization signal recognition particle; involved in protein-ER targeting
TI4896S001826	31/D12	-0.46	SPBC12D12.02c	cdm1	DNA polymerase delta subunit; non-essential; no apparent Sc ortholog
TI4896S000828	20/C01	-0.46	SPCC1919.03c		5'-amp-activated protein kinase beta subunit; involved in the regulation of fatty acid synthesis by the phosphorylation of acetyl-CoA carboxylase; involved in the regulation of carbohydrate metabolism; N-myristoylated (ISS)
TI4896S000352	21/E03	-0.46	SPCC24B10.15		hypothetical protein
TI4896S001580	40/A03	-0.46	SPBC2F12.11c	rep2	DSC1/MBF trancription factor complex; zinc finger protein; zf-C2H2 type; involved in start control point of mitotic cell cycle; interacts with the MBC binding subunit complex; no apparent orthologs
TI4896S003614	49/D02	-0.46	SPAC20H4.01	SPAC631.03	WD repeat protein; ribonucleoprotein (RNP) complex; processome component; involved in rRNA processing
TI4896S004646	47/B03	-0.46	SPAC1093.03		polyphosphoinositide phosphatase activity
TI4896S004903	08/H02	-0.46	SPAC14C4.01c	SPAC19D5.08c	hypothetical protein; sequence orphan
TI4896S003121	38/G06	-0.46	SPAC1687.11	pmt2	RNA methyltransferase; potential SAM-dependent enzyme; involved in rRNA processing
TI4896S004610	51/F03	-0.46	SPAC27D7.09c		Sp specific families; glycoprotein; possibly Sp specific; similar to Sp SPAC27D7.10c and SPAC27D7.11c and SPBC3D6.02 (paralogs); tandem duplication
TI4896S003193	11/D05	-0.46	SPAC1A6.08c		sequence orphan; hypothetical protein
TI4896S003326	04/B11	-0.46	SPAC3A12.07	rpb11	DNA-directed RNA polymerase II (subunit); involved in transcription from Pol II promoter; DNA-directed RNA polymerase activity (function of complex); DNA-binding activity; interacts physically with Rpb2p; interacts physically with Rpb3p
TI4896S000442	48/B04	-0.46	SPCC4E9.01c	rec11; SPCC550.16c	region specific activator of recombination; involved in meiotic recombination (required); involved in sister chromatid cohesion; cohesin complex (meiotic); chromosome arm cohesin complex (meiotic); low similarity to WD repeat protein (probably spurious); similar to Sp rec7 (paralog); no apparent Sc ortholog
TI4896S003889	27/E06	-0.46	SPAC6F6.03c		GTP-binding protein associated; localization nucleus; part of a pre-60S complex (SGD)
TI4896S002111	24/E07	-0.46	SPBC2D10.13	est1	TPR repeat protein; EST1 domain; involved in telomere maintenance; involved in telomerase-dependent telomere maintenance; involved in telomerase regulation; involved in transcriptional silencing; similar to Sp SPBC2F12.03c
TI4896S003398	29/E11	-0.46	SPAC23H4.01c	SPAP27G11.01	involved in ergosterol biosynthesis; oxysterol binding protein; ankyrin repeat protein; pleckstrin homology domain; similar to Sp SPBC2F12.05c
TI4896S001421	41/H03	-0.46	SPBC27B12.13	SPBC8D2.22	mitochondrial outer membrane translocase complex; involved in mitochondrial outer membrane protein import; mitochondrial import receptor
TI4896S004549	21/H12	-0.45	SPAC1527.03		RNA-binding protein; LA-related
TI4896S003255	23/C08	-0.45	SPAC10F6.11c		kinase activator; involved in autophagy; predicted coiled-coil
TI4896S003535	37/D04	-0.45	SPAP14E8.06c	orp3; orc3; SPAC3H1.01c	origin recognition complex (subunit 3)
TI4896S001842	20/G03	-0.45	SPBC24C6.10c		conserved hypothetical protein
TI4896S003317	34/D12	-0.45	SPAC20G8.07c		C-8 sterol isomerase
TI4896S001612	03/D02	-0.45	SPBC18H10.13	rps1402; rps14-2	40S ribosomal protein S14
TI4896S000287	13/G10	-0.45	SPCC1020.06c	tal1	transaldolase; involved in pentose-phosphate shunt, non-oxidative branch; transaldolase activity
TI4896S000562	46/E02	-0.45	SPCC584.04	sup35	omnipotent nonsense suppressor; EF1 alpha factor-like GTP-binding protein translation release factor; GTP-binding protein; GTP/GDP-dependent (class-II) release factor; omnipotent nonsense suppressor; interacts physically with Sup45p; complexed with Sup45p; altered form creates prions
TI4896S002200	36/D09	-0.45	SPBC776.06c		spindle pole body interacting protein (predicted); similar to S. cerevisiae YOR129C
TI4896S003302	16/G02	-0.45	SPAC57A10.04		hypothetical protein; sequence orphan; low similarity to RhoGEF
TI4896S000534	18/A12	-0.45	SPCC11E10.02c	gpi8	GPI-anchor transamidase activity; GPI-anchor transamidase complex; peptidase family C13; essential; involved in GPI anchor biosynthesis; involved in attachment of GPI anchor to protein (required); functionally complements S. cerevisiae GPI8
TI4896S001306	39/H05	-0.45	SPBC1734.14c	suc1	cyclin-dependent kinases regulatory subunit cyclin-dependent kinases regulatory subunit; involved in the regulation of CDK activity; involved in control of mitosis
TI4896S000482	43/C05	-0.45	SPCC132.03		sequence orphan; hypothetical protein
TI4896S002675	32/E04	-0.45	SPBC543.07	skh1; pek1; mkk1	serine/threonine protein kinase; MAP kinase kinase (MAPKK); acts as a phosphorylation-dependent molecular switch; mkh1 signaling pathway component
TI4896S004838	29/F03	-0.45	SPAC22E12.16c		phosphatidylinositol kinase; Belongs to the PI3/PI4-kinase family; Contains 1 PI3K/PI4K domain; similar to S. cerevisiae YNL267W
TI4896S004259	46/E07	-0.45	SPAC17G6.18	SPAC1142.01	conserved eukaryotic protein; predicted coiled-coil region; DUF654; similar to mouse nulp1
TI4896S000654	45/B01	-0.45	SPCC1450.15		phosphoethanolamine N-methyltransferase activity; involved in GPI anchor biosynthesis; similar to human PIG-F
TI4896S000683	39/C01	-0.45	SPCC285.14		TRAPP; Belongs to the TMEM1 family; involved in intracellular protein transport
TI4896S001397	25/G11	-0.45	SPBC3D6.10		DNA-(apurinic or apyrimidinic site) lyase activity
TI4896S001716	12/C01	-0.44	SPBC29A3.11c		conserved hypothetical; hypothetical protein; similar to Sp SPCC1682.13
TI4896S003789	28/C01	-0.44	SPAC23H3.06	apl6	AP-3 complex; adaptin; involved in vesicle-mediated transport
TI4896S001881	12/D04	-0.44	SPBC21D10.10		bromodomain protein
TI4896S001946	32/B01	-0.44	SPBC2G5.07c	rpc25	DNA directed RNA polymerase III subunit
TI4896S001556	24/G08	-0.44	SPBC21B10.06c		hypothetical protein; sequence orphan
TI4896S000888	07/H10	-0.44	SPCC70.09c		conserved hypothetical protein; similar to Sp SPBC19C7.04c; possibly fungal specific
TI4896S001220	49/B10	-0.44	SPBC713.07c		vacuolar polyphosphatase
TI4896S000218	13/C03	-0.44	SPCC1183.02		glutathione S-transferase (putative); similar to the N-terminal of translation elongation factors
TI4896S004590	15/D07	-0.44	SPAC17C9.11c		conserved protein; zinc finger protein; zf-C2H2 type; UBX domain; no apparent Sc ortholog
TI4896S001483	50/E07	-0.44	SPBC32H8.02c	pi021; SPACTOKYO_453.14c	Ulp1 protease family
TI4896S003111	38/B11	-0.43	SPAC222.02c	SPAC1687.22c	RNA-binding protein; pumilio family
TI4896S002040	04/A05	-0.43	SPBC19C7.05		hypothetical protein; sequence orphan
TI4896S001100	43/H03	-0.43	SPBC354.03		SET1 complex (TAP); WD repeat protein; involved in transcriptional silencing; involved in regulation of chromatin remodelingl; non-essential; involved in histone H3 K4 methylation (required)
TI4896S002020	41/C02	-0.43	SPBC685.07c	rpl2701; rpl27-1; rpl27a	60S ribosomal protein L27
TI4896S001109	40/C03	-0.43	SPBC354.12	gpd3	glyceraldehyde 3-phosphate dehydrogenase; similar to Sp SPBC32F12.11
TI4896S004331	20/G10	-0.43	SPAC4H3.01		DNAJ domain protein
TI4896S002183	33/G10	-0.43	SPBC4C3.02c	ade1; SPBC405.01	phosphoribosylamine-glycine ligase; phosphoribosylformylglycinamidine cyclo-ligase; involved in purine biosynthesis; bifunctional enzyme; de novo purine biosynthesis pathway (2nd step); de novo purine biosynthesis pathway (5th step)
TI4896S000637	08/A06	-0.43	SPCC191.09c		glutathione S-transferase; altered form creates prions
TI4896S000014	07/A11	-0.43	SPCC757.10	vph2	involved in vacuolar ATPase assembly
TI4896S003509	41/H08	-0.43	SPAPB1A10.02		sequence orphan; hypothetical protein
TI4896S003439	12/F07	-0.43	SPAC824.07		hydroxyacylglutathione hydrolase
TI4896S002869	14/C02	-0.42	SPAC18B11.06		U3 snoRNP component; involved in rRNA processing
TI4896S002301	36/B10	-0.42	SPBC4B4.04		translation initiation factor eIF2A
TI4896S002964	17/D06	-0.42	SPAC227.18	lys3; SPAC2F7.01	saccharopine dehydrogenase [NAD+, L-lysine forming]
TI4896S002231	44/A02	-0.42	SPBC25H2.15		hypothetical protein; related to proteins involved in programmed cell death
TI4896S002462	23/G11	-0.42	SPBC21C3.02c		hypothetical protein
TI4896S000974	24/B02	-0.42	SPBC31E1.05		nuclear pore complex; involved in RNA export
TI4896S002331	14/B07	-0.42	SPBC1718.05	trs31	TRAPP plays a key role in the late stages of endoplasmic reticulum to Golgi traffic; Similarity Belongs to the TRAPP small subunits family; BET3 subfamily.
TI4896S003276	13/D07	-0.42	SPAC1565.04c	ste4	involved in conjugation; pheromone signalling pathway; involved in meiosis; SAM domain (sterile alpha motif); interacts physically with Byr2p (SAM domain); regulates Byr2p
TI4896S004710	31/F11	-0.42	SPAC1782.07	qcr8	ubiquinol cytochrome c reductase complex subunit (cytochrome bc1 complex); respiratory complex III; ubiquinone-binding protein qp-c
TI4896S002898	10/D04	-0.42	SPAC630.10		hypothetical protein
TI4896S004185	24/D01	-0.42	SPAC3A11.12c	rpt5; pam2; tbp1; SPAC3H5.01	19S proteasome regulatory subunit; AAA family ATPase; switch from mitotic to meiotic cell cycle is disturbed by strong activation of Ras-MAP kinase cascade in the fission yeast 26S proteasome-related mutants; (old-> probable 26S protease regulatory subunit 6A.)
TI4896S000678	25/F07	-0.42	SPCC285.09c	cgs2; pde1	3',5'-cyclic-nucleotide phosphodiesterase; cAMP phosphodiesterase class II
TI4896S002840	45/H10	-0.42	SPAC24B11.11c	sid2	Sid2p-Mob1p kinase complex; serine/threonine protein kinase; SIN component; protein kinase C terminal domain; involved in cytokinesis (required); involved in septation (required); spindle pole body kinase; expression peaks at M-G1 phase; regulated by PBF transcription complex; protein kinase activity Mob1p dependent; phosphoprotein; similar to S. cerevisiae YGR092W and YPR111W; essential
TI4896S003699	28/B08	-0.42	SPAC13G7.04c	mac1	membrane anchored protein; similar to Sp SPCC1739.10; involved in cell separation (required at high temperatures); possibly fungal specific
TI4896S004843	11/B11	-0.41	SPAC2E12.03c		G-protein coupled receptor activity; PQ loop; similar to Sp SPAC17C9.10; nutrient sensor for sexual differentiation and/or stress response pathways
TI4896S002772	50/G04	-0.41	SPAC977.10	sod2	CPA1 sodium ion/proton antiporter; similar to Sp SPAC3A11.09 (paralog)
TI4896S000507	17/C01	-0.41	SPCC1281.08	wtf11	wtf element
TI4896S001474	49/E07	-0.41	SPBP22H7.02c	pi029; SPACTOKYO_453.05c	RNA-binding protein; rrm RNA recognition motif; involved in ribosome biogenesis and assembly
TI4896S002313	04/F06	-0.41	SPBC2G2.04c	mmf1; pmf1	eukaryotic conserved protein; endoribonuclease L-PSP; YjgF family; involved in mitochondrial protein synthesis; involved in mitochondrial DNA maintenance; involved in heat shock response; heat-induced protein; links isoleucine biosynthesis and intact mitochondria maintenance; functionally complements Sc YIL051C; similar to Sp mmf2 (paralog)
TI4896S001060	43/E01	-0.41	SPBC428.09c		removed from GeneDB
TI4896S003051	17/F12	-0.41	SPAC22G7.10		polyadenylation factor (PF1 subunit); directly interacts with poly(A) polymerase
TI4896S002935	38/C05	-0.41	SPAC24H6.09		RhoGEF; guanine nucleotide exchange factor; interacts physically with Cdc42p; regulates Cdc42p; involved in septation; involved in septum formation; involved in cellular elongation; involved in bipolar growth; predicted coiled-coil region; overexpression suppresses orb6-25; overexpression suppresses orb2-34; non-essential; involved in the Cdc42p-Shk1p-Orb6p signaling cascade; double mutant gef1de…
TI4896S000810	12/G07	-0.41	SPCC1620.10	cwf26	eukaryotic conserved protein; complexed with Cdc5p
TI4896S003852	24/F06	-0.41	SPAC4F8.14c	hcs1; hcs	3-hydroxy-3-methylglutaryl coenzyme A synthase; hydroxymethylglutaryl-coa synthase; involved in mevalonate synthesis; IQ calmodulin binding motifs; involved in ergosterol biosynthesis; (old-> hydroxymethylglutaryl-CoA synthase (EC 4.1.3.5))
TI4896S004385	28/A12	-0.41	SPAC2F3.13c		tRNA-ribosyltransferase; no apparent Sc ortholog
TI4896S001585	30/G09	-0.41	SPBC2F12.05c		involved in ergosterol biosynthesis; oxysterol binding protein; ankyrin repeat protein; pleckstrin homology domain; similar to Sp SPAC23H4.01
TI4896S003583	47/H04	-0.41	SPAC607.01	psc3; SPAC17H9.20	cohesin subunit; essential; involved in sister chromatid cohesion (S phase) (required); involved in mitotic progression; STAG domain
TI4896S000224	42/F10	-0.41	SPCC1183.08c	rpl101; rpl1-1; rpl10a-2	60S ribosomal protein L10A
TI4896S003024	37/E05	-0.41	SPAC22F3.09c	pct1; res2; mcs1	DSp1/MBF trancription factor complex; involved in start control point of mitotic cell cycle; involved in control of meiotic start; mitotic catastrophe suppressor; APSES domain; DNA-binding protein; ankyrin repeat protein; involved in control of mitosis; partner of Cdc10p transcription factor; ankyrin repeat protein; similar to Sp SPBC336.12c and SPBC725.16
TI4896S003053	04/E12	-0.41	SPAC4G8.02c		translocon (gamma subunit); involved in protein-ER targeting
TI4896S002708	33/H12	-0.41	SPBC1289.04c	pob1	involved in cell polarity (maintenance) (required); involved in cellular elongation (required); involved in cytokinesis; involved in cell separation (required); essential; pleckstrin homology domain; SAM domain (sterile alpha motif); src (SH3) homology domain
TI4896S004561	43/G03	-0.41	SPAC30.12	tbp1; tdf1; tbp; SPAC29E6.08	TATA-binding protein TBP; transcription initiation factor TFIID subunit
TI4896S000642	08/F01	-0.41	SPCC1450.03		hypothetical protein; sequence orphan
TI4896S004794	29/D06	-0.41	SPAC1B3.13		WD repeat protein; involved in the regulation of nucleolar silencing; involved in the regulation of the telophase exist (RENT) complex; ribonucleoprotein (RNP) complex; small subunit (SSU) processome component; involved in rRNA processing
TI4896S001243	36/F12	-0.41	SPBC646.11	cct6	chaperonin-containing T-complex; T-complex protein 1 (zeta subunit); chaperone; involved in protein folding; involved in actin folding; involved in tubulin folding
TI4896S004020	09/A03	-0.41	SPAC24C9.02c		cytochrome c1 heme lyase
TI4896S004728	22/H08	-0.40	SPAC22F8.09		conserved protein; similar to human GLTSCR2 glioma tumor suppressor candidate region protein2
TI4896S004250	10/F01	-0.40	SPAC17G6.09	sec62	SRP receptor activity; involved in intracellular protein transport; involved in protein-ER targeting; involved in SRP-dependent cotranslational membrane targeting
TI4896S003125	51/G01	-0.40	SPAC1687.23c		very hypothetical protein
TI4896S003359	12/D09	-0.40	SPAC5D6.02c		hypothetical protein; sequence orphan
TI4896S004295	46/E12	-0.40	SPAC15A10.15		hypothetical protein; sequence orphan
TI4896S003385	47/D12	-0.40	SPAC23H4.14	vps39	CNH domain; involved in intracellular protein transport; involved in vacuole fusion
TI4896S001232	47/F08	-0.40	SPBC216.06c	swi1	involved in mating-type determination; involved in imprinting at the mating type locus (sensu Fungi); interacts with topoisomerase; TPR domains (inferred from context); involved in DNA replication (inhibition)
TI4896S000545	51/E05	-0.40	SPCC188.06c	srp54	signal sequence binding activity; GTPase; essential; involved in intracellular protein transport; involved in protein-ER targeting (required); involved in SRP-dependent cotranslational membrane targeting
TI4896S004003	32/E07	-0.40	SPAC31G5.09c	spk1	serine/threonine protein kinase; MAP kinase (MAPK); involved in conjugation (required), pheromone signaling pathway; tyrosine-phosphorylated protein
TI4896S001056	19/F08	-0.40	SPBC428.05c		argininosuccinate synthase; non-essential
TI4896S000547	41/A06	-0.40	SPCC188.08c	ubp5; ubp22	ubiquitin C-terminal hydrolase activity; peptidase family C19; similar to Sp ubp21 (paralog); double mutant ubp21 delta/ubp22 delta lethal; MATH domain (SMART)
TI4896S004708	16/C02	-0.40	SPAC1782.05		Sc RRD2 is involved in rapamycin sensitivity and cell cycle progression; similar to phosphotyrosyl phosphatase activator
TI4896S001208	22/B05	-0.40	SPBC36.06c		farnesyl pyrophosphate synthetase; Sp SPAC6F12.13C; involved in ergosterol biosynthesis
TI4896S002371	26/D04	-0.39	SPBC887.17		uracil permease; no apparent Sc ortholog
TI4896S004595	24/D12	-0.39	SPAC17C9.06		conserved protein; probably outer membrane by similarity; Sc -null mutant is essential for mitotic growth forming microcolonies of several hundred cells with heterogeneous bud sizes
TI4896S002623	48/C12	-0.39	SPBC3F6.05	rga1	GTPase activator; RhoGAP domain; LIM domain; involved in actin cytoskeletal organization; involved in actin cortical patch distribution; involved in cellular morphogenesis; involved in cell wall biosynthesis; involved in septum formation; involved in septation; putative GAP for Rho1p
TI4896S004274	12/E08	-0.39	SPAC8C9.09c		hypothetical protein; sequence orphan
TI4896S002726	45/F05	-0.39	SPBP4G3.01	SPBC8E4.01c	inorganic phosphate transporter; MFS inorganic phosphate transporter
TI4896S000735	24/E02	-0.39	SPCC18.15		WD repeat protein
TI4896S000881	23/H05	-0.39	SPCC70.03c		proline dehydrogenase; involved in proline catabolism; involved in glutamate biosynthesis; proline dehydrogenase activity
TI4896S001984	18/C04	-0.39	SPBC4F6.05c		lectin predicted; predicted N-terminal signal sequence; 1 predicted transmembrane helix; cargo receptor for glycoproteins; involved in intracellular protein transport; involved in ER to Golgi transport; involved in secretory pathway; COPII-coated vesicle component;
TI4896S003248	16/B05	-0.39	SPAC10F6.04		alpha-tubulin suppressor; regulator of condensation (RCC1) domains
TI4896S003810	35/G12	-0.39	SPAC4A8.06c		esterase; no apparent Sc ortholog
TI4896S000026	22/F01	-0.39	SPCC613.09		tRNA-splicing endonuclease subunit
TI4896S002776	50/C02	-0.39	SPAC977.14c		putative oxidoreductase; Aldo/keto reductase; telomeric duplication; similar to Sp SPAC750.01 (pseudo)
TI4896S004101	06/C12	-0.39	SPAC6G10.10c		eukaryotic conserved protein; predicted coiled-coil region; similar to N. crassa 99H12.130; no apparent Sc ortholog
TI4896S003574	03/E02	-0.39	SPAC17H9.11		cofilin/tropomyosin-type actin binding protein; similar to Sc YDR063W
TI4896S003241	16/D10	-0.39	SPAC4C5.01		haloacid dehalogenase; similar to Sp SPCC1020.07 (paralog)
TI4896S003508	49/F12	-0.38	SPAPB1A10.01c	SPAP11E10.02c	Sp specific families; hypothetical protein; possibly Sp specific; serine-threonine repeat containing protein; glycoprotein
TI4896S002353	02/E03	-0.38	SPBC1105.17	cnp1; sim2	inner centromere protein; histone H3 variant; essential; involved in chromosome segregation (required)
TI4896S001923	10/H01	-0.38	SPBC365.16		hypothetical protein; sequence orphan
TI4896S002737	49/A04	-0.38	SPBPB2B2.09c		ketopantoate reductase
TI4896S001093	28/E12	-0.38	SPBC649.01c	klp6; SPBC1685.15c	kinesin-like protein; microtubule-destabilizing Kin I family; KIP3 subfamily; non essential; involved in microtubule disassembly; involved in meiosis (required); regulates the establishment of metaphase; regulates the onset of anaphase A; deletion mutant results in resistance to microtubule poison thiabendazole; deletion mutant results in abnormally long cytoplasmic microtubules; involved in chro…
TI4896S003737	34/H02	-0.38	SPAC22H10.07	ral3; scd2	involved in conjugation; involved in sporulation; involved in cellular morphogenesis; src (SH3) homology domain; PX domain; phosphoinositide binding; PB1 domain; Ras1p-Scd1p-Scd2p-Cdc42p-Shk1p complex; interacts physically with GTP-Cdc42p (effector CB1 and CB2); interacts physically with Shk1p (effector CB2, target PXXP)
TI4896S003840	28/C07	-0.38	SPAC7D4.11c		hypothetical protein; similar to N. crassa 15E6.130; no apparent Sc ortholog
TI4896S000166	35/F02	-0.38	SPCC4G3.05c	mus81	endodeoxyribonuclease RUS activity; Holliday junction resolvase; involved in DNA repair, nucleotide-excision repair, and nucleotide-excision repair, DNA damage recognition; interacts physically with Cds1p; XP-F family?; involved in meiotic recombination (required) (late step) and the processing of stalled and collapsed replication forks
TI4896S001568	10/G02	-0.38	SPBC19C2.08		U4/U6 snRNA dissociation factor; involved in mRNA splicing
TI4896S002683	07/B04	-0.38	SPBC16C6.05		conserved hypothetical; conserved protein; similar to human DENR/DRP density-regulated protein-a protein expressed at high cell density but not during growth arrest
TI4896S004508	09/F07	-0.38	SPAC2C4.11c		RNA-binding protein; KH domain
TI4896S000865	20/A02	-0.38	SPCC965.12		dipeptidase; no apparent Sc ortholog; non-essential
TI4896S001865	32/A02	-0.38	SPBC36B7.05c		phosphatidylinositol(3)-phosphate binding protein; zinc finger protein; zf-FYVE type
TI4896S003487	14/F09	-0.38	SPAC1002.07c	ats1	N-acetyltransferase; GNAT family; closest Sc homologs HPA2 and HPA3 are histone acetyltransferases but Sp sequence is more similar to bacterial acetyltransferases?; human homolog SAT is a Spermidine/spermine N1-acetyltransferase which catalyzes rate-limiting step in polyamine catabolism
TI4896S001798	26/A05	-0.38	SPBC14C8.17c		WD repeat protein; involved in transcriptional activation; SAGA complex (Spt-Ada-Gcn5-Acetyltransferase); ADA complex
TI4896S003229	44/B09	-0.38	SPAC22A12.06c		DUF341; involved in nucleotide metabolism
TI4896S001347	38/C03	-0.38	SPBC1306.01c	SPBC409.22c	elongation factor G
TI4896S002652	36/D12	-0.38	SPBC16A3.17c		transporter; unknown specificity; similar to Sp SPAC3H1.06C (paralog)
TI4896S001906	44/D08	-0.38	SPBC557.05		hypothetical protein; arrestin family
TI4896S003516	49/D11	-0.37	SPAPB1A10.09		microtubule-associated protein; involved in spindle elongation (anaphase); similar to human prc1, protein regulating cytokinesis
TI4896S000926	45/F12	-0.37	SPBC359.03c		amino acid permease
TI4896S000481	43/H01	-0.37	SPCC132.02		transcriptional regulator; Sir2p family; histone deacetylase activity; NAD-dependent histone deacetylase activity; involved in transcriptional regulation; involved in chromatin silencing; involved in chromatin assembly/disassembly
TI4896S000357	09/E03	-0.37	SPCC24B10.20		hypothetical short chain dehydrogenase
TI4896S002386	31/F09	-0.37	SPBC16D10.11c	rps1801; rps18-1	40S ribosomal protein S18
TI4896S000341	06/F09	-0.37	SPCC24B10.04		hypothetical protein; sequence orphan
TI4896S004573	13/B11	-0.37	SPAC9E9.05		adaptor; synaptojanin binding; involved in actin cytoskeletal organization; involved in actin cortical patch assembly; all by similarity to S. cerevisiae YPR171 which is low but reciprocal best hits
TI4896S001177	42/E10	-0.37	SPBC577.05c		hypothetical protein; sequence orphan
TI4896S002086	26/F04	-0.37	SPBC1703.12	nbp9	ubiquitin C-terminal hydrolase activity
TI4896S001379	08/C10	-0.37	SPBC651.06		hypothetical protein; sequence orphan
TI4896S004828	14/F03	-0.37	SPAC22E12.06c	gmh3	alpha-1,2-galactosyltransferase Gmh3; GMA12/MNN10 family; belongs to the glycosyltransferase 34 family; predicted N-terminal signal sequence; a-methyl-D-mannoside as an acceptor; involved in the galactosylation of the N-linked core oligosaccharide Man(9)GlcNAc(2); similar to S. pombe gmh1 and gmh2 and gma12 and SPBC1289.13C and SPAC5H10.13C and SPAC637.06 and SPBC8D2.17
TI4896S002502	23/D10	-0.37	SPBC1604.18c		SNF7 family; involved in intracellular protein transport; class E vps
TI4896S003443	27/H07	-0.37	SPAC664.02c		actin-like protein
TI4896S000910	44/E06	-0.37	SPCC569.07		putative aromatic aminotransferase; similar to Sp SPAC56E4.03 and SPBC1773.13 (paralogs)
TI4896S002727	40/E01	-0.37	SPBP4G3.02	pho1	acid phosphatase; GPI anchored protein; glycoprotein
TI4896S002030	04/H07	-0.37	SPBC32F12.08c		hypothetical protein
TI4896S000223	31/B04	-0.37	SPCC1183.07		RNA-binding protein; S1 RNA binding domain; ribonucleoprotein (RNP) complex; processome component; involved in rRNA processing
TI4896S002406	29/H10	-0.37	SPBP8B7.19		FACT complex component; chromatin binding activity; involved in chromatin mediated transcriptional regulation; involved in DNA replication; involved in chromatin remodeling; chromatin assembly/disassembly; alpha DNA polymerase primase complex; involved in RNA elongation from Pol II promoter; transcription elongation factor complex
TI4896S001132	17/D09	-0.37	SPBC115.03	SPBC839.18c	oxidoreductase; similar to Sp SPAC26H5.09C
TI4896S004370	26/G01	-0.37	SPAC323.06c	uba5	ubiquitin activating enzyme
TI4896S001755	17/G06	-0.36	SPBC1711.04		methylenetetrahydrofolate reductase; involved in methionine metabolism
TI4896S001938	51/E07	-0.36	SPBC29A10.15	orc1; orp1	origin recognition complex (subunit 1); involved in S phase checkpoint (required); AT hook protein; AAA family ATPase; BAH domain; Cdc18/Cdc6 family of S-phase regulators
TI4896S003464	18/D09	-0.36	SPAC17A5.03	rpl301; rpl3-1; rpl3	60S ribosomal protein L3; similar to Sp rpl302; identical to rpl302 except AA78,V-I
TI4896S004323	01/D07	-0.36	SPAC1F12.03c		very hypothetical protein; sequence orphan
TI4896S001594	06/E11	-0.36	SPBC11G11.01		TPR repeat protein; involved in mitochondrial division
TI4896S000627	22/G06	-0.36	SPCC417.11c		putative glutamate-1-semialdehyde aminotransferase; no Sc ortholog
TI4896S003579	44/A08	-0.36	SPAC17H9.17c		putative mitochondrial inheritance component; involved in mitochondrial inheritance; involved in actin cytoskeleton organization; functional inferences may be incorrect
TI4896S002216	13/F09	-0.36	SPBC21.03c		similar to gene expressed in hematopoietic stem/progenitor cells from Myelodysplastic Syndrome; expressed in cd34+ stem cells; DUF 589; no apparent Sc ortholog
TI4896S003169	23/F02	-0.36	SPAC23C4.03		haspin related kinase; invovled in DNA repair; involved in DNA damage response; involved in cell cycle progression; STYKc kinase (SMART)
TI4896S002358	28/B06	-0.36	SPBC887.04c		WD repeat protein; PLAP family; involved in ubiquitin-dependent proteolysis; interacts physically with SPAC1565.08; involved in DNA repair; RAD6 epistasis group; similar to mammalian phospholipase a-2-activating protein
TI4896S000825	44/H06	-0.36	SPCC1919.01	SPCC830.12	serine/threonine protein kinase; no apparent Sc ortholog
TI4896S004997	35/H09	-0.36	SPAC1039.09	isp5	involved in sexual differentiation; amino acid permease family; similar to Sp SPAP7G5.06 and SPAC869.11 and SPBC359.01 and SPBC359.01 and meu22 and SPBPB2B2.01
TI4896S004215	39/A01	-0.36	SPAC16E8.09	scd1; ral1	mating and morphogenesis protein Scd1p. guanine nucleotide exchange factor; involved in conjugation; involved in cell polarity (required); involved in sporulation; involved in cellular morphogenesis; involved in endocytosis; regulates Cdc42p; GEF for Cdc42p; non-essential; deletion results in round cells; deletion results in mating defects; deletion can worsen the growth defect of moe1; interacts…
TI4896S001233	34/C09	-0.36	SPBC646.01c	tor2; SPBC216.07c	phosphatidylinositol kinase; similar to Sp TOR1 (paralog); involved in starvation response (required); involved in stress response
TI4896S001504	50/D08	-0.36	SPBC11B10.09	cdc2; swo2; pi002; SPACTOKYO_453.34	serine/threonine protein kinase; cyclin-dependent protein kinase; essential; regulates cell cycle transition G1/S; regulates cell cycle transition G2/M; G2/M Cdc2p CDK associates with Cdc13p; G2/M Cdc2p CDK complex is inhibited by Tyr15 phosphorylation during G2 phase; Cdc2p CDK complex is inhibited by Tyr15 phosphorylation by DNA replication/DNA damage checkpoint activation; G1/S promoting compl…
TI4896S002277	40/A01	-0.35	SPBC11C11.07	rpl1801; rpl18; rpl18-1	60S ribosomal protein L18
TI4896S000325	29/H04	-0.35	SPCC16A11.04		sorting nexin; PX domain; phosphoinositide binding; involved in intracellular protein transport; RGS domain, regulator of G-protein signaling; similar domain arrangement to human SNX13
TI4896S003667	36/D11	-0.35	SPAC18G6.11c	rrn3	RNA polymerase I specific transcription initiation factor
TI4896S004246	28/D03	-0.35	SPAC17G6.05c		endosome associated protein; involved in intracellular protein transport; involved in signal transduction; BRO1-like domain
TI4896S000706	46/A04	-0.35	SPCC737.03c		hypothetical protein; similar to N. crassa NCU03345.1; no apparent Sc ortholog
TI4896S001217	49/E09	-0.35	SPBC713.04c		WD repeat protein; ribonucleoprotein (RNP) complex; processome component; involved in rRNA processing; involved in cytokinesis; involved in cell separation
TI4896S003854	34/C11	-0.35	SPAC4F8.12c	spp42; cwf6	Status U5 snRNA-associated splicing factor; involved in mRNA splicing; complexed with Cdc5p
TI4896S000230	06/E04	-0.35	SPCC31H12.04c	rpl1202; rpl12-2	60S ribosomal protein L12
TI4896S001231	41/B03	-0.35	SPBC216.05	rad3	ATR (ATM) checkpoint kinase; involved in DNA repair; involved in DNA damage checkpoint; involved in DNA replication checkpoint; involved in meiotic recombination
TI4896S002440	48/H09	-0.35	SPBC13G1.10c		DEAD/DEAH box helicase; helicase C-terminal domain; Sec63 domain; involved in mRNA stability; involved in mRNA processing
TI4896S001963	38/D06	-0.35	SPBC6B1.06c	ubp14	ubiquitin C-terminal hydrolase activity; UBA domain; ubiquitin-binding protein (implicated); involved in protein deubiquitination; zinc finger protein; zf-UBP type
TI4896S000268	42/B11	-0.35	SPCC18B5.04		ribosomal protein S18
TI4896S004202	30/E06	-0.35	SPAC328.06	ubp2	ubiquitin C-terminal hydrolase activity
TI4896S001311	19/F11	-0.35	SPBC1709.03		sequence orphan; hypothetical protein
TI4896S000342	04/F07	-0.35	SPCC24B10.05		zinc finger protein; zf-Tim10/DDP type; involved in mitochondrial import (predicted); involved in transfer of hydrophobic inner membrane carrier proteins across the intermembrane space (predicted)
TI4896S001281	33/F06	-0.35	SPBC337.05c	cct8	chaperonin-containing T-complex; T-complex protein 1 (theta subunit); involved in protein folding; involved in actin folding; involved in tubulin folding
TI4896S004052	41/C01	-0.35	SPAC589.10c		ubiquitin family protein; identical to Sp SPAC6G10.11c
TI4896S002427	33/C08	-0.35	SPBC25D12.05	trm1	N2,N2-dimethylguanosine tRNA methyltransferase
TI4896S004942	07/E05	-0.35	SPAP8A3.06		U2AF small subunit (U2AF-23); involved in mRNA splicing; zinc finger protein; zf-CCCH type (2); rrm RNA recognition motif; RNA-binding protein; SF1-U2AF(59)-U2AF(23) complex; involved in pre-spliceosome formation; similar to human U2AF35; no apparent Sc ortholog
TI4896S004354	39/A12	-0.35	SPAC1071.10c	pma1	plasma membrane ATPase 1 (EC 3.6.1.35) P-type proton ATPase; P3 type
TI4896S001781	32/H02	-0.35	SPBC1815.01	eno1	enolase; similar to Sp eno102 (paralog)
TI4896S004077	45/F02	-0.34	SPAC3G9.11c		pyruvate decarboxylase; similar to Sp SPAC13A11.06
TI4896S000862	10/E10	-0.34	SPCC965.09		hydrolase; nitrilase family
TI4896S003014	11/H02	-0.34	SPAC1D4.09c		conserved hypothetical protein; no apparent Sc ortholog
TI4896S002738	50/C08	-0.34	SPBPB2B2.10c		galactose-1-phosphate uridylyltransferase
TI4896S000762	26/H10	-0.34	SPCC1739.13	hsp70	heat shock protein 70 family; similar to Sp SPAC13G7.02 (paralog)
TI4896S002195	39/G02	-0.34	SPBC776.01	rpl29	60S ribosomal protein L29
TI4896S003312	46/G07	-0.34	SPAC20G8.02		phospholipase; DDHD domain (putative metal binding site)
TI4896S002532	45/A02	-0.34	SPBC26H8.09c		sequence orphan; hypothetical protein
TI4896S003123	16/E01	-0.34	SPAC1687.13c	csn5	COP9/signalosome complex (subunit 5); MOV34 domain; involved in deneddylation
TI4896S003344	11/A10	-0.34	SPAC9.08c		steroid reductase; no apparent Sc ortholog
TI4896S000824	07/A09	-0.34	SPCC830.11c		conserved hypothetical protein
TI4896S001711	35/A03	-0.34	SPBC29A3.06		WD repeat protein; CGI-48 family
TI4896S004798	45/D05	-0.34	SPAC1B3.17		sequence orphan; hypothetical protein
TI4896S004009	40/D02	-0.34	SPAC31G5.14	gcv1; n313	aminomethyltransferase; glycine decarboxylase T subunit; involved in glycine metabolism; involved in glycine catabolism; aminomethyltransferase activity
TI4896S001212	05/G01	-0.34	SPBC36.10		phenylalanyl-tRNA synthetase (alpha subunit); phenylalanine-tRNA ligase activity; involved in protein biosynthesis
TI4896S000146	14/F02	-0.34	SPCC306.06c		possibly involved in cell wall maintenance; possibly involved in maintaining beta,-1,6-glucan levels
TI4896S000711	50/A03	-0.34	SPCC737.08		midasin; predicted coiled-coil protein; involved in nuclear export; AAA family ATPase; EF hand motif; calcium binding protein; Sc MDN1 is null lethal
TI4896S004095	16/H06	-0.34	SPAC6G10.04c		20S proteasome subunit (alpha 6)
TI4896S003733	17/C09	-0.34	SPAC22H10.04		serine/threonine protein phosphatase; PPP family; related to PP2A phosphatases; involved in glycogen accumulation
TI4896S004588	09/H07	-0.34	SPAC17C9.13c	cut8	essential; involved in anaphase (required); possibly regulates APC
TI4896S003211	48/B03	-0.34	SPAC56F8.03		translation initiation factor if-2
TI4896S002178	29/A07	-0.34	SPBC4C3.06		conserved hypothetical; hypothetical protein; FCH domain
TI4896S001815	46/F10	-0.34	SPBC16H5.10c	prp43	RNA helicase; involved in mRNA splicing
TI4896S002181	01/D12	-0.34	SPBC4C3.04c		guanine nucleotide exchange factor
TI4896S004592	31/D02	-0.33	SPAC17C9.09c	tim13	60S ribosomal protein L37a/L43A
TI4896S003758	23/C12	-0.33	SPAC6B12.10c	pri1	DNA primase small subunit; DNA primase activity; involved in telomere maintenance
TI4896S003270	26/B08	-0.33	SPAC1420.02c	cct5	chaperonin-containing T-complex; T-complex protein 1 (epsilon subunit); involved in protein folding; involved in actin folding; involved in tubulin folding
TI4896S002993	35/C07	-0.33	SPAC3H8.08c		zinc finger protein; zf-fungal Zn(2)-Cys(6) binuclear cluster domain; involved in transcriptional regulation
TI4896S003680	26/C03	-0.33	SPAC4G9.05		RNA-binding protein; pumilio family
TI4896S001290	39/H10	-0.33	SPBC337.14	rpb4	DNA-directed RNA polymerase subunit DNA-directed RNA polymerase II (subunit); essential; involved in transcription from Pol II promoter; DNA-directed RNA polymerase activity (function of complex); interacts physically with Rpb7p
TI4896S000366	02/A05	-0.33	SPCC1795.12c		very hypothetical protein
TI4896S002550	42/D05	-0.33	SPBC3B9.12		TRAPP; sybindin-like famil; YDR246Winvolved in intracellular protein transport; similar to S. cerevisiae
TI4896S004199	25/A05	-0.33	SPAC328.03	tps1	alpha,alpha-trehalose-phosphate synthase [UDP-forming]; glycosyl transferase family 20; involved in trehalose metabolism; involved in stress response (required); complexed with Ntp1p
TI4896S001527	33/C12	-0.33	SPBC29B5.01	atf1; mts1; sss1; gad7	transcription factor; involved in sexual development (required); involved in entry into stationary phase(required); involved in G1 arrest; involved in gene expression under nitrogen starvation (required); heterodimeric transcriptional activator; involved in meiotic recombination; binds M26 recombination hotspot; involved in oxidative stress response; target for the Sty1p stress-activated MAP kina…
TI4896S001948	34/B02	-0.33	SPBC25B2.02c	mam1; SPBC2G5.09c	ABC transporter family; MDR subfamily; mating factor; M-factor transporter
TI4896S004307	37/F02	-0.33	SPAP7G5.03		conserved fungal protein; transmembrane helices
TI4896S002350	26/F12	-0.33	SPBC1105.14		zinc finger protein; zf-C2H2 type; involved in transcriptional activation
TI4896S003396	09/G08	-0.33	SPAC23H4.03c	erv25	COPII-coated vesicle component predicted; emp24 family; predicted N-terminal signal sequence; 1 predicted transmembrane helix
TI4896S003929	24/C01	-0.33	SPAC3F10.04	gsa1; gsh2	glutathione synthetase; involved in glutamate metabolism; involved in glutathione biosynthesis; involved in cadmium resistance; involved in phytochelatin synthesis; functionally complemeted by A. thaliana gsh2; subunit data; expression regulated by the Atf1-Spc1-Wis1 signaling pathway
TI4896S003242	11/A03	-0.33	SPAC4C5.02c	ryh1; hos1	small GTPase; Rab family; GTP-binding protein; Protein transport; Might participate in post-Golgi transport; non-essential; deletion mutant is temperature sensitive for growth, sensitive to osmotic stress and severely sterile; C-terminal CXC prenylation site; similar to S. cerevisiae YLR262C
TI4896S002639	14/F01	-0.32	SPBC16G5.10		exosome (RNase complex); involved in rRNA processing
TI4896S001654	31/D09	-0.32	SPBP16F5.05c		ankyrin repeat protein
TI4896S003588	37/A10	-0.32	SPAC607.06c		zinc metallopeptidase
TI4896S000415	07/F11	-0.32	SPCC4B3.09c		mitochondrial ribosomal protein L7/L12
TI4896S003262	04/F02	-0.32	SPAC56E4.02c		conserved protein; glycosyl transferase family 28
TI4896S001120	47/H02	-0.32	SPBC839.06	cta3	Ca2(+)-ATPase; P-type ATPase
TI4896S003914	25/E04	-0.32	SPAC1805.10		sequence orphan; hypothetical protein
TI4896S003530	49/D08	-0.32	SPAP14E8.01c	ssp1; pss1; SPAC110.04c	heat shock protein 70 family
TI4896S000111	26/G06	-0.32	SPCC736.08		DNA-binding protein; recombination signal specific; involved in meiotic recombination; no apparent Sc ortholog; non-essential
TI4896S002849	04/A08	-0.32	SPAC806.07	ndk1	nucleoside diphosphate kinase; involved in CTP biosynthesis; involved in regulation of sexual development
TI4896S000250	35/C03	-0.32	SPCC16C4.07	scw1	RNA-binding protein; involved in septation and regulation of septum formation; regulates cell wall structure; rrm RNA recognition motif
TI4896S004505	08/G08	-0.32	SPAC2C4.08		hypothetical protein
TI4896S004013	43/C06	-0.32	SPAC31G5.18c		ubiquitin family protein; no apparent Sc ortholog
TI4896S002799	27/E08	-0.32	SPAC11D3.11c	SPAC11D3.12c	possible pseudogene; 1 frameshift; putative transcriptional activator; zinc finger protein; similar to Sp SPCC757.04
TI4896S000779	41/D07	-0.31	SPCC576.11	rpl15	60S ribosomal protein L15
TI4896S000337	23/G09	-0.31	SPCC16A11.16c		membrane glycoprotein; ARM1 family; no apparent Sc ortholog
TI4896S000258	15/E12	-0.31	SPCC16C4.15		mitochondrial ribosomal protein L2
TI4896S003580	42/A04	-0.31	SPAC17H9.18c		very hypothetical protein
TI4896S002856	36/B11	-0.31	SPAC1F5.09c	shk2; pak2	serine/threonine protein kinase; pleckstrin homology domain; p21 activated kinase (PAK); effector for Cdc42p; non-essential; activator of Mkh1p-Pek1p-Spm1p cascade; Cdc42p/Rac interactive binding (CRIB) motif
TI4896S003528	49/G06	-0.31	SPAC110.02	pds5	cohesin-associated protein; involved in sister chromatid cohesion; involved in DNA repair; involved in DNA damage response (required); involved in chromosome segregation (required); involved in survival after metaphase arrest (required); interacts physically with Eso1p
TI4896S000298	21/D08	-0.31	SPCC1393.06c		involved in RNA processing and modification (implicated)
TI4896S000512	03/E01	-0.31	SPCC622.04		very hypothetical protein
TI4896S004400	23/B11	-0.31	SPAC27E2.05	cdc1; mis1	DNA polymerase delta (small subunit); interacts physically with Cdc27p; interacts physically with Pol3p; involved in DNA replication (required); involved in cell cycle progression (required); involved in telomere maintenance
TI4896S003519	50/H08	-0.31	SPAPB1A10.12c		D-arabinono-1,4-lactone oxidase
TI4896S004286	13/F06	-0.31	SPAC15A10.05c		conserved hypothetical; hypothetical protein; YjeF domain
TI4896S004514	29/B11	-0.31	SPAC2C4.17c		conserved hypothetical; MS ion channel; EF hand motif; no apparent Sc ortholog
TI4896S004711	26/A01	-0.31	SPAC1782.08c		exonuclease
TI4896S004272	03/F08	-0.31	SPAC8C9.07		very hypothetical protein
TI4896S002008	35/B03	-0.30	SPBC336.09c	rrn7	RNA polymerase I transcription factor (subunit); interacts physically with Rrn11p
TI4896S003110	06/B07	-0.30	SPAPYUL23.01	rpc19; rpa17; SPAC1687.01	DNA-directed RNA polymerase I and III; functionally complements Sc RPC19
TI4896S001215	49/G03	-0.30	SPBC713.02c	ubp15; ubp21; ubpd	ubiquitin C-terminal hydrolase activity; peptidase family C19; MATH domain; similar to Sp SPCC188.08c (paralog); overexpression can partially suppress a mutation in Prp4p; involved in regulating levels of Prp4p; double mutant ubp21 delta/ubp22 delta lethal
TI4896S004454	10/B01	-0.30	SPAC26H5.13c		conserved fungal protein; sphingoid long chain base (LCB) kinase; similar to S. cerevisiae YOR171C and YLR260W; 4 predicted transmembrane helices
TI4896S000886	09/F11	-0.30	SPCC70.07c	tmp1; tmp	thymidylate kinase; functionally complements Sc CDC8
TI4896S004065	40/C02	-0.30	SPAC688.13	scn1	interacts physically with Cut9p; TatD DNase family
TI4896S002994	28/E01	-0.30	SPAC3H8.09c		RNA-binding protein; rrm RNA recognition motif; involved in packaging pre-mRNAs into ribonucleoprotein structures amenable to efficient nuclear RNA processing (SGD)
TI4896S004474	51/G03	-0.30	SPAC683.03		very hypothetical protein
TI4896S001971	35/G02	-0.30	SPBC3E7.05c		hypothetical protein
TI4896S003628	21/C11	-0.30	SPAC23C11.04c	pnk1	DNA kinase/phosphatase; DNA repair protein
TI4896S000967	26/F08	-0.30	SPBC660.15		RNA-binding protein; rrm RNA recognition motif; mRNA cleavage factor complex; involved in polyadenylation
TI4896S001866	31/E09	-0.30	SPBC36B7.06c		hypothetical protein; sequence orphan
TI4896S001767	25/B06	-0.30	SPBC1711.16		WD repeat protein
TI4896S002681	09/E06	-0.30	SPBC16C6.03c		hypothetical protein; sequence orphan
TI4896S004284	39/G01	-0.30	SPAC15A10.03c	rhp54; rad54	DNA repair protein Rhp54 DEAD/DEAH box helicase; SNF2 family; helicase C-terminal domain; DNA dependent ATPase activity; DNA supercoiling activity; involved in DNA repair; deletion mutant sensitive to UV; deletion mutant sensitive to ionizing radiation); deletion mutant results in elongated cells (frequent); deletion mutant results in aberrant nuclei (occasional); deletion mutant results in a hig…
TI4896S003227	51/B01	-0.29	SPAC22A12.04c	rps2202; rps15a-1; rps22-1	40S ribosomal protein S15A/S22A
TI4896S000951	31/E08	-0.29	SPBC1198.09	ubc16	ubiquitin conjugating enzyme
TI4896S004145	05/A04	-0.29	SPAC26A3.08	smb1; smb	small nuclear ribonucleoprotein associated protein B; putative pre-mRNA splicing factor; complexed with Cdc5p
TI4896S003297	22/F07	-0.29	SPAC19E9.01c		nucleoporin; non-essential; Functions as a component of the nuclear pore complex (NPC); NPC components, collectively referred to as nucleoporins (NUPs), can play the role of both NPC structural components and of docking or interaction partners for transiently associated nuclear transport factors. Active directional transport is assured by both, a Phe-Gly (FG) repeat affinity gradient for these tr…
TI4896S003313	35/A05	-0.29	SPAC20G8.03	itr2	MFS myo-inositol transporter; similar to Sp itr1
TI4896S004583	42/G07	-0.29	SPAC9E9.15		hypothetical protein; sequence orphan
TI4896S002117	03/H12	-0.29	SPBC2D10.19c		small hypothetical protein; confirmed by EST
TI4896S000474	30/A12	-0.29	SPCC1322.12c	bub1	spindle assembly checkpoint component; essential; mitotic centromere protein; serine/threonine protein kinase
TI4896S000743	14/H10	-0.29	SPCC4F11.03c		sequence orphan; hypothetical protein
TI4896S004044	49/G12	-0.29	SPAC589.02c		RNA polymerase II holoenzyme component; similar to H. sapiens TRAP240/ARC250
TI4896S001653	32/B06	-0.29	SPBP16F5.04	ubc3; ubcp3	ubiquitin conjugating enzyme; involved in transcriptional silencing of the mating-type region; overexpression derepressed transcriptional silencing of the mating-type region
TI4896S000233	28/G09	-0.29	SPCC31H12.07	sec231; sec23a; SPCC5E4.01	GTPase activator; zinc-binding protein; involved in intracellular protein transport; COPII-coated vesicle component; involved in ER to Golgi transport; similar to Sp SPBC776.04
TI4896S001158	10/B04	-0.29	SPBC119.03		catechol O-methyltransferase; no apparent Sc ortholog; similar to Sp SPBPB21E7.03c (paralog)
TI4896S003675	35/C06	-0.29	SPAC13D6.04c		hypothetical protein; ankyrin repeat protein; BTB domain
TI4896S001703	36/C07	-0.29	SPBP23A10.14c		predicted coiled-coil protein; sequence orphan
TI4896S000780	01/F04	-0.29	SPCC576.12c		hypothetical protein
TI4896S000692	48/C11	-0.28	SPCC1223.06	tea1	tip elongation aberrant microtubule-associated protein; involved in cell polarity; involved in cellular elongation; kelch repeat protein; target of Shk1p; phosphorylated by Shk1p; involved in cytokinesis; involved in microtubule based movement; involved in cell-end anchoring (required); similar to Sp tea3
TI4896S003145	29/D05	-0.28	SPAC222.14c		conserved hypothetical; GTP-binding protein; similarity in the C-terminal region to human GBP1, an interferon-induced GTP-binding protein
TI4896S004435	42/F09	-0.28	SPAC23A1.11	rpl1602; rpl13a-2; rpl16-2	60S ribosomal protein L16-a. 60S ribosomal protein L13/L16; similar to Sp rpl1601 and rpl1603
TI4896S001461	40/H09	-0.28	SPBC17A3.04c	pi043; SPBC17A3.04c	methionine-tRNA ligase; involved in methionyl-tRNA aminoacylation; methionine-tRNA ligase activity
TI4896S000713	47/A02	-0.28	SPCC74.08c	hmt1; SPCC737.09c	ABC transporter family; heavy metal ion transporter; ATP-binding cassette-type vacuolar membrane transporter; involved in heavy metal tolerance (required)
TI4896S002082	43/C08	-0.28	SPBC1703.08c		5-formyltetrahydrofolate cyclo-ligase activity; involved in folinic acid utilization
TI4896S004571	40/H05	-0.28	SPAC9E9.03	leu2	3-isopropylmalate dehydratase
TI4896S004614	27/E02	-0.28	SPAC27D7.13c	ssm4; SPAC637.01c	p150-Glued; microtubule-associated protein; expressed during meiosis; CAP-Gly domain; similar to S. cerevisiae YPL174C
TI4896S002504	06/F07	-0.28	SPBC1604.16c		G-patch domain; RNA-binding protein
TI4896S002246	36/E01	-0.28	SPBC20F10.02c		eukaryotic conserved protein; similar to D. melanogaster CG8379; no apparent Sc ortholog
TI4896S001203	45/G02	-0.28	SPBC36.01c		unknown specificity; transporter; similar to Sp SPAC11D3.05 and SPCC794.04C and SPCC569.05C and SPBC36.03C and SPBC530.15C and SPBC36.02C and SPBC530.02 and SPBC947.06C; tandem duplication; involved in amine/polyamine transport
TI4896S004634	41/G03	-0.28	SPAC12B10.07		F-actin capping protein (alpha subunit); involved in actin filament organization; involved in F-actin capping; actin cortical patch component
TI4896S000047	11/D07	-0.28	SPCC320.11c	SPCC330.18	involved in 60S ribosomal subunit biogenesis
TI4896S004759	08/A07	-0.27	SPAC4F10.20	grx1	arsenate reductase (glutaredoxin) activity; glutaredoxin; thioltransferase; induced by stress; induced in response to metal stress caused by zinc chloride; not induced in response to heat stress; not induced in response to oxidative stress
TI4896S004651	07/C04	-0.27	SPAC30C2.03		hypothetical protein; sequence orphan
TI4896S003103	32/H08	-0.27	SPAC23G3.11	rpn6	19S proteasome regulatory subunit
TI4896S002696	18/D02	-0.27	SPBC1539.02		sequence orphan; hypothetical protein
TI4896S002626	21/C05	-0.27	SPBC342.03		GAS family; glucanosyltransferase; GPI anchored protein (pers. comm. Birgit Eisenhaber); glycoprotein; similar to Sp SPAC11E3.13C (paralog)
TI4896S000143	38/A10	-0.27	SPCC306.03c	cnd2	condensin subunit; XCAP-H; essential; involved in chromosome condensation (required)
TI4896S004613	08/G09	-0.27	SPAC27D7.12c		hypothetical protein; sequence orphan; distantly related to peroxiredoxin
TI4896S003026	04/A07	-0.27	SPAC22F3.07c		ATP synthase G chain
TI4896S002488	40/G06	-0.27	SPBC23E6.08	sat1	involved in starvation-mediated G1 phase arrest; no apparent orthologs
TI4896S000120	23/F10	-0.27	SPCC594.02c		hypothetical protein
TI4896S002203	33/B08	-0.27	SPBC776.09	ste13	DEAD/DEAH box helicase; ATP-dependent; RNA helicase; involved in nitrogen-starvation induced G1 arrest (required); involved in conjugation (initiation) (required); involved in RNA processing; involved in mRNA deadenylation-dependent decapping
TI4896S002886	36/A03	-0.27	SPAC12G12.04	mcp60; hsp60	chaperone; involved in succinate; dehydrogenase assembly; heat shock protein 60; essential
TI4896S003624	41/E07	-0.27	SPAC20H4.11c	rho5	Rho family; small GTPase; similar to Sp rho1
TI4896S004890	09/B08	-0.27	SPAC26F1.02		conservepinin family conserved region; lacks the conserved histidines in other family members; no apparent Sc ortholog
TI4896S002837	18/E10	-0.27	SPAC24B11.08c		COPII-coated vesicle component; involved in intracellular protein transport; involved in ER to Golgi transport; predicted N-terminal signal sequence
TI4896S004034	44/H02	-0.27	SPAC24C9.15c	spn5; mde9; meu28	GTP-binding protein; septin; meiotic expression upregulated; meiosis dependent expression
TI4896S000600	38/D12	-0.27	SPCC663.01c	SPCC777.16c	sap2 family; cell cycle dependent phosphatase-associated protein; involved in chromosome segregation
TI4896S001259	39/E04	-0.27	SPBP35G2.10		helicase C protein with SNF2 domain; zinc finger protein; zf-PHD finger; SNF2 familyhelicase C-terminal domain; DEAD/DEAH box helicase; transcriptional regulator; involved in transcriptional regulation
TI4896S000006	19/D05	-0.26	SPCC757.02c		conserved hypothetical protein; conserved in A. thaliana; no apparent Sc ortholog
TI4896S000153	28/H12	-0.26	SPCC4G3.18		hypothetical protein; sequence orphan
TI4896S004923	39/C07	-0.26	SPAC11E3.02c		hypothetical protein C2 domain; similar to Sp SPBC21C3.20C; similar to N. crassa NCU02833.1
TI4896S003752	20/C04	-0.26	SPAC6B12.04c		aminotransferase
TI4896S001646	07/F05	-0.26	SPBC3H7.04		superoxide dismutase; similar to Sp SPBC16A3.14
TI4896S002861	31/B07	-0.26	SPAC1F5.04c	cdc12	formin; actin-binding protein; essential; profilin-binding protein; interacts physically with Cdc3p; involved in contractile ring assembly, cytokinesis, cell polarity, F-actin capping, and actin nucleation; ts mutant has defective septum pattern; similar to Sp fus1 and for1; possibly travels on both microtubule and actin networks to the future site of cell division
TI4896S003488	17/C03	-0.26	SPAC1002.08c		RNA polymerase specificity factor
TI4896S002123	32/H04	-0.26	SPBC15D4.04	gpt2; gpt	UDP-N-acetylglucosamine--dolichyl-phosphate N-acetylglucosaminephosphotransferase
TI4896S003173	18/D04	-0.26	SPAC23C4.08	rho3	Rho family; small GTPase; involved in cellular morphogenesis; involved in septation; involved in microtubule cytoskeleton organization and biogenesis (IMP); involved in actin cytoskeleton organization and biogenesis; involved in regulation of the actin cytoskeleton; involved in exocytosis (IMP); interacts physically with Myo2p; interacts physically with Exo70p; involved in cell polarity; interact…
TI4896S003182	28/B11	-0.26	SPAC23C4.17		methyltransferase; NOL1/NOP2/sun family; involved in methylation of cytidine to 5-methyl-cytidine (m5C) at several positions in different tRNAs
TI4896S003475	30/F03	-0.26	SPAC17A5.14	exo2	exonuclease II; zf-C2H2 type; mutants are caffeine sensitive
TI4896S000152	28/B12	-0.26	SPCC4G3.19	alp19	gamma tubulin complex; overexpression suppresses an alp6 ts mutant; overexpression lethal; deletion mutant sensitive to microtubule depolymerizing drugs; deletion mutant results in abnormally long cytoplasmic microtubules; similar to H. sapiens hGPC6; no apparent S. cerevisiae ortholog
TI4896S003798	14/A06	-0.26	SPAC23H3.15c	SPAC25H1.01c	hypothetical serine-rich protein; sequence orphan
TI4896S004413	06/B09	-0.26	SPAC19G12.04		ureidoglycolate hydrolase
TI4896S005015	36/A07	-0.26	SPAC869.01		glutamyl tRNA aminotransferase subunit; no apparentSc ortholog
TI4896S002006	48/F10	-0.26	SPBC336.07	sfc3	RNA polymerase III transcription factor (TFIIIC subunit); AT hook protein; homology to B box binding subunit
TI4896S004915	26/G07	-0.26	SPAC14C4.13	rad17	involved in DNA damage checkpoint; involved in DNA replication checkpoint; RFC related; involved in DNA repair; involved in double-strand break repair
TI4896S003539	37/A01	-0.25	SPAC3H1.04c		conserved fungal protein
TI4896S004466	43/E10	-0.25	SPAC25B8.12c		conserved hypothetical; conserved protein; no apparent Sc ortholog; hydrolase
TI4896S002629	17/E02	-0.25	SPBC342.06c		involved in DNA repair
TI4896S004581	09/D02	-0.25	SPAC9E9.13	wos2	p23 homolog; Hsp associated co-chaperone; interacts physically with Hsp90p; involved in mitotic control; interacts with Wee1p; interacts physically with Cdc2p; 3' UTR directs the formation multiple mRNAs; alternative polyadenylation sites results in the production of the 3 differently sized transcripts; alternative transcripts
TI4896S002024	32/B07	-0.25	SPBC32F12.02	rec14	WD repeat protein; involved in meiotic recombination
TI4896S001319	14/G10	-0.25	SPBC1709.11c	png2	zinc finger protein; zf-PHD finger; similar to human candidate tumour suppressor p33(ING1) in their C-terminal regions; involved in chromatin mediated transcriptional regulation; involved in transcriptional regulation
TI4896S003919	50/A09	-0.25	SPAC1805.15c	pub2	ubiquitin-protein ligase (E2); HECT domain; WW domain; C2 domain; constitutively expressed; function overlapping with Pub1p; post-translational modification, Cys639 can be thiol-ubiquitinated; similar to Sp SPBC16E9.11C and SPAC11G7.02
TI4896S004139	24/G10	-0.25	SPAC26A3.02	myh1; myh	MutY homolog; involved in mismatch repair; interacts physically with Pcn1p; adenine DNA glycosylase; A/8-oxoG glycosylase; deletion mutant has mutator phenotype; oxidative DNA damage protection; no apparent Sc ortholog (old-> A/G-specific adenine DNA glycosylase)
TI4896S004569	02/A08	-0.25	SPAC9E9.01		very hypothetical protein; sequence orphan
TI4896S003978	37/E06	-0.25	SPAC2E1P3.04		copper amine oxidase; no apparent Sc ortholog
TI4896S000693	45/H07	-0.25	SPCC1223.07c		aspartate-tRNA ligase; involved in aspartyl-tRNA aminoacylation; aspartate-tRNA ligase activity
TI4896S003749	16/H05	-0.25	SPAC6B12.01	SPAC1B9.03c	RNA-binding protein; eukaryotic conserved protein; involved in RNA processing; involved in ribosome biogenesis and assembly; Brix domain
TI4896S001048	19/E12	-0.25	SPBC582.07c	rpn7	19S proteasome regulatory subunit; essential
TI4896S001323	28/G11	-0.25	SPBC1709.15c		CFII component; involved in polyadenylation
TI4896S002520	02/A02	-0.25	SPBC1677.02	dpm3	dolichol phosphate mannose synthase; can weakly stabilize mammalian DPM1 protein; no apparent Sc ortholog
TI4896S002579	10/C02	-0.25	SPBC1347.07		oligoribonuclease
TI4896S004415	31/D04	-0.25	SPAC19G12.06c	hta2	histone h2a-beta; similar to Sp hta1
TI4896S003774	11/F03	-0.25	SPAC19A8.11c		sequence orphan; hypothetical protein
TI4896S001820	04/H06	-0.25	SPBC16H5.15		hypothetical protein; sequence orphan
TI4896S003491	35/H11	-0.25	SPAC1002.11		GPI-anchor transamidase complex; involved in GPI anchor biosynthesis; involved in attachment of GPI anchor to protein
TI4896S000279	27/A03	-0.24	SPCC14G10.04		hypothetical proline-rich protein
TI4896S002154	48/H11	-0.24	SPBC30D10.10c	tor1	phosphatidylinositol kinase related kinase; TOR signaling pathway; involved in starvation response (required); involved in stress response; similar to Sp SPBC216.07c
TI4896S003538	03/G08	-0.24	SPAC3H1.03		eukaryotic conserved protein; transcriptional regulator; no apparent Sc ortholog
TI4896S001269	27/H10	-0.24	SPBC146.06c		conserved hypothetical protein; similar to O. sativa Q9LWI8 A. thaliana F11A17.9 human KIAA1018 and C. elegans C01G5.8; no Sc ortholog; non-essential
TI4896S000029	26/G02	-0.24	SPCC613.12c		WD repeat protein; similar to N.crassa B13I18.130; no apparent Sc ortholog
TI4896S000397	17/C10	-0.24	SPCC1259.07		conserved hypothetical protein
TI4896S002900	20/C08	-0.24	SPAC630.12		serine/threonine protein phosphatase; calcineurin-like phosphoesterase
TI4896S000406	13/D05	-0.24	SPCC4B3.18		conserved hypothetical; flavoprotein; Sc YIL083C is induced by mating pheromones
TI4896S003704	42/A12	-0.24	SPAC13G7.09c		hypothetical protein; sequence orphan
TI4896S001516	44/B05	-0.24	SPBC83.09c		GYF domain protein; GYF is a proline-binding domain; eukaryotic conserved protein; link between sister chromatid cohesion, DNA replication and splicing
TI4896S000769	51/H01	-0.24	SPCC576.19c		very hypothetical protein
TI4896S002865	27/G06	-0.24	SPAC18B11.10	tup11	transcriptional repressor; histone binding; glucose repression regulatory protein; WD repeat protein
TI4896S003708	25/F08	-0.24	SPAC6C3.01c	SPAC13G7.13c	involved in sporulation; involved in spindle formation (meiotic); rrm RNA recognition motif (2); RNA-binding protein
TI4896S004740	48/B11	-0.24	SPAC4F10.01	SPAC20G4.08	hypothetical protein; sequence orphan; hypothetical protein; sequence orphan; predicted coiled-coil
TI4896S000853	05/E11	-0.24	SPCC1840.11	SPCC965.01	exosome (RNase complex); cytoplasmic and nucleolar forms; S1 RNA binding domain
TI4896S003096	31/E12	-0.24	SPAC23G3.04		hypothetical protein; sequence orphan; similar to C. albicans CA49C10.10 (possibly spurious)
TI4896S000932	45/A12	-0.24	SPBC1683.03c		membrane transporter; unknown specificity
TI4896S001572	42/E04	-0.24	SPBC19C2.12		sequence orphan; mitochondrial ribosomal protein large subunit L51
TI4896S000127	38/G03	-0.24	SPCC1682.02c	mcm3	MCM complex subunit; involved in DNA replication (initiation) (required)
TI4896S002983	08/F07	-0.24	SPAC13A11.03		hypothetical coiled-coil protein; involved in DSB repair
TI4896S003824	09/D04	-0.23	SPAC823.04		conserved hypothetical protein
TI4896S002443	44/D10	-0.23	SPBC13G1.13	SPBC31F10.01	transcription factor TFIIH
TI4896S003973	17/D07	-0.23	SPAC513.06c		dimeric dihydrodiol dehydrogenase; no apparent Sc ortholog
TI4896S003130	22/G12	-0.23	SPAC1687.19c		queuine tRNA-ribosyltransferase; no apparent Sc ortholog
TI4896S004648	46/F09	-0.23	SPAC1093.05		DEAD/DEAH box helicase; ATP-dependent; RNA helicase; involved in 35S primary transcript processing
TI4896S003559	18/A09	-0.23	SPAC9G1.11c	spn4	septin
TI4896S002253	03/G06	-0.23	SPBC20F10.09	lsm5	U6 snRNA-associated protein; Sm domain; involved in mRNA splicing
TI4896S000196	29/C06	-0.23	SPCP31B10.07	eft202	experimentally characterised; elongation factor 2; identical to Sp eft201 (paralog)
TI4896S002115	48/E09	-0.23	SPBC2D10.17		protein with possible zinc finger protein; zf-C2H2 type; predicted coiled-coil region
TI4896S000850	35/C04	-0.23	SPCC1840.08c		glycoprotein; thioredoxin related glycoprotein; similar to Sp SPAC959.05C and SPBC3D6.13C
TI4896S003489	24/H06	-0.23	SPAC1002.09c	dld1; dldh	dihydrolipoamide dehydrogenase (pyruvate dehydrogenase complex e3 component) (oxoglutarate dehydrogenase complex e3 component); involved in glycine catabolism; involved in isoleucine catabolism; involved in leucine catabolism; involved in serine biosynthesis; involved in valine catabolism; involved in acetyl-CoA biosynthesis from pyruvate; involved in G1/S transition of mitotic cell cycle; involv…
TI4896S000384	30/G02	-0.23	SPCC895.09c		RNA helicase; similar to pre-mRNA splicing factors at the C terminus; UBA domain
TI4896S002165	22/G10	-0.23	SPBC1778.03c		NADH pyrophosphatase; Nudix family hydrolase; involved in NADH metabolism
TI4896S002218	33/E05	-0.23	SPBC21.05c	ral2	Status kelch repeat protein; implicated in activation of Ras1p; involved in sexual development
TI4896S000024	43/G01	-0.23	SPCC613.07		conserved hypothetical; zinc finger protein; zf-HIT
TI4896S001995	21/G03	-0.22	SPBC4F6.16c		oxidase; FAD dependent; involved in protein folding; involved in protein disulfide bond formation
TI4896S004050	41/C05	-0.22	SPAC589.08c		DASH complex; microtubule-binding complex
TI4896S001763	46/D08	-0.22	SPBC1711.12		possibly dipeptidyl peptidase; no apparent Sc ortholog
TI4896S003611	18/E11	-0.22	SPAC25A8.02		sequence orphan; hypothetical protein
TI4896S001579	36/C12	-0.22	SPBC2F12.12c		hypothetical protein; interacts with ankyrin repeat containing protein by similarity to D.melanogaster cactin; no apparent Sc ortholog; non-essential
TI4896S002258	38/B12	-0.22	SPBC17D11.04c		zinc finger protein; zf-PHD finger; transcriptional regulator; involved in transcriptional regulation
TI4896S004793	06/E09	-0.22	SPAC1B3.12c	rpb10	DNA-directed RNA polymerase (I, II, and III subunit); involved in transcription from Pol I promoter; involved in transcription from Pol II promoter; involved in transcription from Pol III promoter; DNA-directed RNA polymerase activity (function of complex); localization DNA-directed RNA polymerase I complex; localization DNA-directed RNA polymerase II, core complex; abc10-beta; interacts physical…
TI4896S003456	37/B02	-0.22	SPACUNK12.01	SPAC664.15	conserved hypothetical; WD repeat protein
TI4896S004935	52/B02	-0.22	SPAC11E3.13c		GPI anchored protein (pers. comm. Birgit Eisenhaber); GAS family; involved in cell wall organization and biogenesis (maintenance); glycoprotein; similar to Sp SPBC342.03
TI4896S004270	12/E04	-0.22	SPAC8C9.05		D-Tyr-tRNA[Tyr] deacylase
TI4896S002373	45/C04	-0.22	SPBC887.19		involved in N-linked glycosylation
TI4896S004769	25/A12	-0.22	SPAC19B12.10		conserved hypothetical; similar to human amsh protein; MOV34 domain; no apparent Sc ortholog
TI4896S004169	04/E01	-0.22	SPAC959.08	rpl2102; rpl21-2; rpl21	60S ribosomal protein L21
TI4896S000790	17/E12	-0.22	SPCC126.05c		mitochondrial ribosomal protein L30
TI4896S004544	35/B05	-0.22	SPAC23D3.12		inorganic phosphate transporter; similar to Sp SPBC8E4.01c (paralog)
TI4896S001685	44/B06	-0.21	SPBC1A4.06c		conserved eukaryotic protein; similar to proline transport helper protein
TI4896S004830	02/B04	-0.21	SPAC22E12.08		upstream activation factor complex; involved in activation of RNA polymerase I
TI4896S000645	04/H09	-0.21	SPCC1450.06c		putative glutaredoxin-like protein; arsenate reductase (glutaredoxin) activity; glutaredoxin; monothiol glutaredoxin; thioltransferase
TI4896S004731	04/G11	-0.21	SPAC22F8.12c		hypothetical protein; serine-rich protein; sequence orphan
TI4896S001887	33/C04	-0.21	SPBC21D10.04c	fnx1; SPBC12C2.13c	MFS multidrug efflux transporter; multidrug resistance protein; involved in the transition of cells to a quiescent G0 state
TI4896S002970	45/H11	-0.21	SPAC2F7.07c		zinc finger protein; zf-PHD finger; involved in transcriptional regulation
TI4896S001384	21/B11	-0.21	SPBC651.11c	apm2	AP adaptor complex; involved in vesicle-mediated transport
TI4896S000720	34/C10	-0.21	SPCC74.06	mak3; SPCC74.06	histidine kinase; involved in signal transduction; His-to-Asp phosphorelay; non-essential; functions upstream of Spy1p; function overlapping with Mak2p and Mak1p; involved in mitotic cell cycle control (implicated); involved in oxidative stress response (implicated); involved in the regulation of sexual development (required); PAC domain protein; similar to Sp mak2 and mak1; response regulator re…
TI4896S001097	35/C05	-0.21	SPBC649.05	cut12; stf1	links bipolar spindle formation to mitotic control; spindle pole body protein; essential; interacts physically with Plo1p (2-hybrid); activator of Plo1p; no apparent orthologs
TI4896S002832	07/C02	-0.21	SPAC24B11.03	aps1; SPAC13G6.14	diadenosine 5',5'''-p1,p6-hexaphosphate hydrolase; dual function MutT hydrolase; involved in inositol polyphosphate hydrolysis; non-essential; deletion mutant results in decreased in vitro Ap6A hydrolase activity; degrades PP-InsP5; degrades [PP]x-InsPx
TI4896S001662	17/H08	-0.21	SPBC16E9.05		delta-sterol c-methyltransferase; involved in ergosterol biosynthesis
TI4896S000954	22/H02	-0.21	SPBC660.02	mfr1; SPBC1198.12	WD repeat protein; meiosis-specific activator of APC; coordinates meiotic nuclear division with sporulation; fizzy-related
TI4896S004056	43/D02	-0.21	SPAC688.03c		conserved hypothetical; conserved protein; human deleted in ammecr1 homolog; DUF51
TI4896S002359	43/A12	-0.21	SPBC887.05c	cwf29	RNA-binding protein; rrm RNA recognition motif; U2 snRNP-associated protein; complexed with Cdc5p
TI4896S004497	23/B01	-0.21	SPAC21E11.06	tif224	translation initiation factor eIF-2B delta
TI4896S001485	41/D11	-0.20	SPBC32H8.04c	pi019; SPACTOKYO_453.16	conserved hypothetical; conserved protein
TI4896S004840	16/A06	-0.20	SPAC22E12.18		conserved hypothetical protein
TI4896S003387	16/C09	-0.20	SPAC23H4.12	alp13	chromodomain protein; MRG family; involved in cell polarity (required); histone acetyltransferase complex; involved in histone deacetylation; involved in chromatin silencing; involved in chromatin assembly/disassembly
TI4896S003797	25/E03	-0.20	SPAC23H3.14		conserved hypothetical; hypothetical protein
TI4896S000177	52/B10	-0.20	SPCC970.11c	wtf9; wtf2	wtf element Wtf9
TI4896S000597	47/A03	-0.20	SPCC777.13	vps35	retromer complex; involved in retrograde transport; involved in vesicle formation from the prevacuole
TI4896S001604	36/B06	-0.20	SPBC18H10.05		WD repeat protein; similar to Sp SPAC3H5.08C
TI4896S000378	19/E08	-0.20	SPCC895.03c		involved in translation initiation
TI4896S001841	46/H07	-0.20	SPBC24C6.09c		transketolase; similar to Synechocystis sp. P74690; phosphotransacetylase; bacterial enzyme splits fructose-6-P and/or xylulose-5-P with the aid of inorganic phosphate into either acetyl-P and erythrose-4-P and/or acetyl-P and glyeraldehyde-3-P; no apparent Sc ortholog
TI4896S004248	42/H02	-0.20	SPAC17G6.07c		hypothetical protein; Sc YGL098W is null-lethal; similar to D. melanogaster CG14181 (low)
TI4896S001184	37/A06	-0.20	SPBC577.12		endoribonuclease; DUF71
TI4896S003785	04/H12	-0.20	SPAC23H3.02c		transcription-splicing co-factor; RING finger-like protein; involved in G2/M phase transition (required); eukaryotic conserved protein; Sc YPR094W is null lethal; UPF0123 domain
TI4896S001797	13/C12	-0.20	SPBC14C8.16c	bot1	involved in growth site determination (unpublished); interacts physically with Tea1p (unpublished); interacts physically with Orb6p (unpublished); mitochondrial ribosomal small subunit (putative)
TI4896S000284	44/A05	-0.20	SPCC1020.09		similar to guanine nucleotide-binding protein; WD repeat protein; no apparent Sc ortholog; non-essential
TI4896S002817	43/G11	-0.20	SPAC5H10.12c	B20341-3	GlcNac transferase; galactosyltransferase family 8; similar to S. pombe SPBC4C3.09 and SPBC4C3.08; similar to S. cerevisiae YOR320C; predicted N-terminal signal sequence
TI4896S004746	38/E11	-0.20	SPAC4F10.07c		involved in autophagy
TI4896S003721	42/D11	-0.20	SPAC17G8.05		hypothetical protein; sequence orphan
TI4896S002064	46/E01	-0.20	SPBP4H10.11c		fatty acyl coA ligase; similar to Sp SPBC18H10.02 (paralog)
TI4896S003790	03/B08	-0.20	SPAC23H3.07c		mitochondrial ribosomal protein S14
TI4896S001291	07/E06	-0.19	SPBC337.15c	coq7	involved in ubiquinone biosynthesis; involved in respiration
TI4896S004068	08/D08	-0.19	SPAC3G9.02		3-oxo-acyl-(acyl carrier protein) reductase
TI4896S001503	50/F09	-0.19	SPBC11B10.07c	pi004; SPACTOKYO_453.33c	hypothetical protein; similar to Sp SPBC1773.11c
TI4896S003370	27/B02	-0.19	SPAC57A7.04c	pab1; pabp	poly(A) binding protein; involved in polyadenylation; non-essential; shuttling factor; involved in rRNA export, mRNA stability
TI4896S004300	18/B12	-0.19	SPAC15E1.05c		ethanolamine-phosphate cytidylyltransferase activity; involved in phosphatidylcholine biosynthesis
TI4896S002267	17/D10	-0.19	SPBC17D1.05		sequence orphan; hypothetical protein; serine-rich protein
TI4896S003304	04/E07	-0.19	SPAC57A10.06		hypothetical protein; sequence orphan; has transcript profile on microarray
TI4896S001150	44/A07	-0.19	SPBPJ694.01	dps; SPBPJ4664.01	decaprenyl diphosphate synthase; polyprenyl synthetase; no apparent Sc ortholog
TI4896S001973	09/G11	-0.19	SPBC3E7.07c		hypothetical protein
TI4896S002523	20/B06	-0.19	SPBC26H8.02c	sec9	SNARE; involved in secretory pathway
TI4896S001285	06/D04	-0.19	SPBC337.09	erg28	involved in ergosterol biosynthesis
TI4896S004040	43/G10	-0.19	SPAC16A10.06c	pli2	zinc finger protein; zf-MIZ; involved in DNA repair
TI4896S001940	17/F11	-0.19	SPBC2G5.01		conserved hypothetical; hypothetical protein
TI4896S003963	38/D03	-0.19	SPACUNK4.08		dipeptidyl aminopeptidase; peptidase family S9; predicted N-terminal signal anchor; prolyl endopeptidase
TI4896S000183	04/B07	-0.19	SPCC970.05	rpl3601; rpl36-1	60S ribosomal protein L36.1/L36A
TI4896S003397	36/B12	-0.19	SPAC23H4.02		serine/threonine protein kinase; similar to Sp SPCC74.03C (paralog)
TI4896S002349	03/E06	-0.19	SPBC1105.13c		hypothetical protein; sequence orphan; low correlation score; has transcript profile on microarray
TI4896S001254	33/A10	-0.19	SPBP35G2.05c	cki2	serine/threonine protein kinase; casein kinase; similar to Sp SPBC1347.06c and SPAC1805.05 (paralogs)
TI4896S002498	10/D03	-0.19	SPBC211.08c		ribonuclease PH-like; 3' exoribonuclease; RNase complex
TI4896S001710	05/G02	-0.18	SPBC29A3.05		putcyclin G1 interacting protein
TI4896S000437	48/C05	-0.18	SPCC550.11		RanBP7/importin-beta/Cse1p family; RanGTP-binding protein; involved in mRNA export; involved in mRNA decay
TI4896S000270	44/D11	-0.18	SPCC18B5.06	erf1; sup45	translation release factor; eRF1-like protein
TI4896S003757	12/F10	-0.18	SPAC6B12.09		tRNA m(1)G methyltransferase; conserved protein; implicated in human cancers
TI4896S000945	09/B09	-0.18	SPBC1198.03c		hypothetical protein; sequence orphan
TI4896S000543	51/E11	-0.18	SPCC188.03	cnd3	condensin subunit; non-SMC subunit; XCAP-G; essential; involved in chromosome condensation (required)
TI4896S001634	34/D02	-0.18	SPBC3H7.16	SPBC28E12.06c	lysosomal trafficking regulator; WD repeat protein; Beach domain; zinc finger protein; zf-FYVE type; beige protein homolog
TI4896S003632	08/D01	-0.18	SPAC23C11.08	php3	CCAAT-box binding factor; required for growth on non-fermentable carbon sources
TI4896S003083	40/H06	-0.18	SPAC2G11.11c	prh1	ATP-dependent RNA helicase; DEAD/DEAH box helicase
TI4896S003825	13/E10	-0.18	SPAC823.05c	tlg2	SNARE; 1 predicted transmembrane helix; t-SNARE that functions in transport from the endosome to the late Golgi and on the endocytic pathway (By similarity); syntaxin/epimorphin family; 1 t-SNARE coiled-coil homology domain
TI4896S002800	42/H01	-0.18	SPAC11D3.13		conserved protein; ThiJ domain; similar to Sp SPBC947.09 and SPCC757.03C and SPAC5H10.02C
TI4896S003872	24/C08	-0.17	SPAC644.11c		pyruvate dehydrogenase (lipoamide) kinase; ATPase; involved in acetyl-CoA biosynthesis from pyruvate; pyruvate dehydrogenase (lipoamide) kinase activity
TI4896S002746	50/E03	-0.17	SPBPB2B2.18		very hypothetical protein
TI4896S004116	01/E06	-0.17	SPAC6G9.13c		hypothetical protein; sequence orphan; has transcript profile on microarray
TI4896S002612	46/F12	-0.17	SPBC14F5.06		iron sulfur protein; RNAse L inhibitor
TI4896S001696	48/E06	-0.17	SPBP23A10.07	rpa2	DNA-directed RNA polymerase I (subunit)
TI4896S003629	11/G01	-0.17	SPAC23C11.05	ppa1; ppa	inorganic pyrophosphatase
TI4896S001508	29/F01	-0.17	SPBC83.01		actin cortical patch component; predicted coiled-coil region (600-700 AA); involved in endocytosis; EH domains; UBA domain; EF hand motifs; calcium binding protein; similar to Sp SPBC800.10C and SPAC25G10.09C; involved in protein deubiquitination (implicated); ubiquitin-binding protein
TI4896S000561	34/G05	-0.17	SPCC584.03c		RanGTP-binding protein; similar to Sp SPCC584.03C (paralog)
TI4896S000145	18/C02	-0.17	SPCC306.05c		INSIG domain; no apparent Sc ortholog; conserved in human and rat; involved in control of sterol homeostasis (possibly) (pers. comm. P. Espenshade)
TI4896S003058	20/A08	-0.17	SPAC4G8.06c		fungal conserved protein
TI4896S004457	25/B04	-0.17	SPAC25B8.03		phosphatidylserine decarboxylase; involved in phosphatidylcholine biosynthesis; phosphatidylserine decarboxylase activity; similar to Sp SPBC16E9.18
TI4896S000745	01/D01	-0.17	SPCC4F11.05		very hypothetical protein
TI4896S003710	01/D09	-0.17	SPAC6C3.03c		very hypothetical protein
TI4896S002412	08/C02	-0.17	SPBP8B7.25	cyp4	cyclophilin; peptidyl-prolyl cis-trans isomerase
TI4896S000429	39/B10	-0.17	SPCC550.03c		putative DEAD/DEAH box helicase DEAD/DEAH box helicase; Sc SKI2 is part of a system to protect cells from double-stranded RNA (dsRNA) viruses
TI4896S001091	29/C04	-0.17	SPBC1685.14c		conserved hypothetical; hypothetical protein; non-essential
TI4896S004811	37/H03	-0.17	SPAC1952.13	ned1	nuclear elongation and deformation protein; required for chromosome stability; required for normal nuclear morphology; conserved eukaryotic protein; functional homolog of Sc SMP2; homolog of mouse lpin; interacts physically with Pim1p (2-hybrid); interacts physically with Dis3p (2-hybrid); interacts physically with Nup189p (2-hybrid); interacts genetically with pim1; interacts genetically with sp…
TI4896S003782	36/C09	-0.17	SPAC19A8.03		phosphatidylinositol 3-phosphate phosphatase; similar to protein tyrosine phosphatases myotubularin-like
TI4896S000257	47/G04	-0.17	SPCC16C4.14c	sfc4	RNA polymerase III transcription factor (TFIIIC subunit); Brf-associated binding subunit; predicted to bind SPBC13E7.10c (brf); TPR repeat protein
TI4896S003323	43/B08	-0.17	SPAC3A12.04c		RNase P subunit; involved in tRNA maturation
TI4896S002976	14/D02	-0.16	SPAC2F7.14c		exosome (RNase complex); involved in rRNA processing
TI4896S004766	16/D12	-0.16	SPAC19B12.07c		conserved hypothetical; zinc finger protein; zf-C2H2 type
TI4896S003093	39/B12	-0.16	SPAC23G3.01	rpb2; SPAC521.06	DNA-directed RNA polymerase II 138 k DNA-directed RNA polymerase II (subunit); involved in transcription from Pol II promoter; DNA-directed RNA polymerase activity (function of complex); DNA-binding activity (function of complex); RNA binding activity; interacts physically with Rpb3p; interacts physically with Rpb11p
TI4896S002954	07/F09	-0.16	SPAC227.08c		zf-CCCH type zinc finger protein; involved in polyadenylation
TI4896S000688	15/G09	-0.16	SPCC1223.02	nmt1; thi3	experimentally characterised; involved in the regulation of thiamine biosynthesis; repressed by thiamine; involved in hydroxymethylpyrimidine synthesis; involved in thiamine synthesis; deletion mutant results in thiamine auxotrophy; no message in thiamine; co-ordinately regulated with nmt1???
TI4896S001246	40/E10	-0.16	SPBC646.14c	orc5	origin recognition complex (subunit 5)
TI4896S000912	35/G04	-0.16	SPCC569.05c		unknown specificity; transporter; similar to Sp SPAC11D3.05 and SPCC794.04C and SPBC530.15C and SPBC36.03C and SPBC36.01C and SPBC36.02C and SPBC530.02 and SPBC947.06C; involved in amine/polyamine transport
TI4896S004105	27/B07	-0.15	SPAC6G9.02c		RNA-binding protein; pumilio family
TI4896S002073	43/H04	-0.15	SPBP4H10.20	nhm1; DcpS	eukaryotic conserved protein; HIT family of pyrophosphatase; histidine triad (HIT) motif protein; co-purifies with the cap-binding complex eIF4F; RNA-binding protein; predicted novel decapping pathway; putative scavenger mRNA decapping enzyme; homology to the human tumour suppressor Fhit; possibly associates with exonuclease exosome components
TI4896S004738	44/C10	-0.15	SPAC20G4.07c	sts1	c-24(28) sterol reductase; involved in ergosterol biosynthesis; implicated in pleiotropic drug-sensitivity; implicated in divalent cation-sensitivity; implicated in osmoregulation
TI4896S004959	35/H04	-0.15	SPAC4D7.09	tif223	translation initiation factor (eif-2b gamma subunit); nucleotidyltransferase
TI4896S001748	32/G02	-0.15	SPBC23G7.12c	let1; rpt6	19S proteasome regulatory subunit; AAA family ATPase
TI4896S000936	35/H07	-0.15	SPBC1683.07		alpha-glucosidase; alpha-amylase
TI4896S004650	13/E08	-0.15	SPAC30C2.02		HEAT repeat
TI4896S000232	23/B02	-0.15	SPCC31H12.06		hypothetical protein; sequence orphan
TI4896S004631	23/A05	-0.15	SPAC12B10.04		tubulin-tyrosine ligase
TI4896S004448	26/E10	-0.15	SPAC26H5.07c		similar to the transmembrane region of mannosyltransferases; similar to Sp SPBC18A7.02c
TI4896S003327	42/F05	-0.15	SPAC3A12.08		hypothetical protein; possibly fungal specific;
TI4896S003610	47/C01	-0.15	SPAC25A8.01c		SNF2 family; DNA-dependent ATPase domain; helicase C-terminal domain; involved in chromosome organization and biogenesis (sensu Eukarya); CUE domain protein (inferred from context)
TI4896S003691	06/B01	-0.15	SPAC4G9.16c	rpl901; rpl9-1	60S ribosomal protein L9
TI4896S003368	47/C08	-0.15	SPAC57A7.06		ribonucleoprotein (RNP) complex; small subunit (SSU) processome component; involved in rRNA processing; predicted coiled-coil protein; predicted ATP/GTP binding (prosite)
TI4896S003822	01/A06	-0.15	SPAC823.02	SPAC1E11.02	hypothetical protein; with confirmed intron; sequence orphan
TI4896S002948	06/H10	-0.15	SPAC227.02c		eukaryotic conserved protein; Sc YPR143W is null lethal; predicted coiled-coil region
TI4896S004616	10/C11	-0.15	SPAC637.03		hypothetical protein; sequence orphan
TI4896S002220	23/F05	-0.15	SPBC21.07c		serine/threonine protein kinase
TI4896S003403	42/D02	-0.15	SPAP27G11.06c		AP-1 Golgi-associated clathrin assembly proteinAP-1adaptor complex; involved in vesicle-mediated transport
TI4896S001195	28/G07	-0.15	SPBC530.08		transcriptional regulator; zinc finger protein; zf-fungal Zn(2)-Cys(6) binuclear cluster domain; possibly binds Pst1 histone deacytylase B by similarity to Sc SIN complex protein (transcriptional regulator of RNA polymerase II); predicted membrane-tethered transcription factor; NLS (bipartite)
TI4896S001914	34/E08	-0.15	SPBC365.07c		involved in transcriptional regulation; tata element modulatory factor tmf; predicted coiled-coil protein
TI4896S003007	19/E09	-0.14	SPAC1D4.02c		GRASP55/65 family; mammalian GRASP protein homolog predicted; putative golgi stacking machinery; spindle checkpoint protein; similar to S. cerevisiae YDR517W
TI4896S004596	16/F12	-0.14	SPAC17C9.05c		sequence orphan; hypothetical protein
TI4896S000449	39/C12	-0.14	SPCC645.06c	rgf3	hypothetical Rho1 GDP-GTP exchange protein; non-essential; interacts genetically with septins; rho1 gdp-GTP exchange protein; RhoGEF; pleckstrin homology domain; similar to Sp SPCC645.07 and and SPAC1006.06; divergently orientated to rgf1
TI4896S004763	01/B04	-0.14	SPAC19B12.04	rps3001; rps30-1	40S ribosomal protein S30
TI4896S003190	44/H09	-0.14	SPAC1A6.05c		phospholipase; patatin domain
TI4896S001395	06/E10	-0.14	SPBC3D6.08c		small nuclear ribonucleoprotein (Sm protein); RNA-binding protein; involved in mRNA decay; involved in rRNA processing; involved in deadenylation-dependent decapping
TI4896S003863	43/D06	-0.14	SPAC4F8.02c	SPAC644.02	mitochondrial ribosomal protein L40 (L24)
TI4896S002568	12/G12	-0.14	SPBC215.11c		aldo/keto reductase; no apparent Sc ortholog
TI4896S001356	22/H05	-0.14	SPBC725.01		aspartate aminotransferase; similar to Sp SPAC10F6.13C (paralog)
TI4896S003967	39/C02	-0.14	SPAPYUK71.03c		putative C2 domain family protein C2 domain; similar to Sp SPCC962.01
TI4896S001943	14/G02	-0.14	SPBC2G5.04c		COPII-coated vesicle component; predicted N-terminal signal sequence
TI4896S001211	25/E08	-0.14	SPBC36.09	sap61	zinc finger protein; zf-C2H2 type; RNA-binding protein; complexed with Cdc5p
TI4896S003002	22/C09	-0.14	SPAC1F3.07c		hypothetical protein; sequence orphan
TI4896S003544	46/E10	-0.14	SPAC3H1.09c		amino acid transporter
TI4896S002334	49/B04	-0.14	SPBP7E8.01	SPBPB7E8.01	hypothetical protein; sequence orphan
TI4896S000655	25/A07	-0.14	SPCC1450.16c		phospholipase; triacylglycerol lipase; patatin domain
TI4896S000331	14/B11	-0.14	SPCC16A11.10c	oca8	cytochrome b5; electron transporter; overexpression results in cell cycle defects; similar to Sp SPBC29A10.16C
TI4896S004911	22/B03	-0.14	SPAC14C4.09		glucanase; by similarity to Penicillium purpurogenum mutanase; no apparent Sc ortholog
TI4896S001718	16/G08	-0.13	SPBC29A3.13		conserved hypothetical; PWWP domain protein; involved in cell growth; similar to Sp SPBC215.07C and SPAC23D3.01
TI4896S004756	02/F02	-0.13	SPAC4F10.17		hypothetical protein
TI4896S001960	12/H08	-0.13	SPBC6B1.03c		conserved hypothetical; hypothetical protein
TI4896S000044	13/H05	-0.13	SPCC320.14	SPCC330.15c	putative serine/threonine dehydratase
TI4896S002473	31/F02	-0.13	SPBC21C3.13	rps1901; rps19-1	40S ribosomal protein (S19.1/S19A subunit)
TI4896S004980	13/A06	-0.13	SPAC29B12.05c		S-adenosylmethionine-dependent methyltransferase activity
TI4896S002919	19/B01	-0.13	SPAC31A2.15c		replication factor C complex; involved in sister chromatid cohesion
TI4896S004511	13/B09	-0.13	SPAC2C4.14c		serine/threonine protein kinase; sporulation specific
TI4896S000857	46/G05	-0.13	SPCC965.04c		AAA family ATPase; metallopeptidase
TI4896S000393	42/D06	-0.13	SPCC1259.03	rpa12	DNA-directed RNA polymerase I subunitDNA-directed RNA polymerase activity (A12.2 subunit); DNA-directed RNA polymerase I complex; involved in transcription from Pol I promoter; functionally complements Sc RPA12; non-essential: required for growth at high temperatures
TI4896S001633	14/G11	-0.13	SPBC28E12.05	SPBC3H7.17c	involved in transcriptional activation; rrm RNA recognition motif (inferred from context); similar to M. musculus TBP-binding protein abt1; predicted coiled-coil regions
TI4896S002033	40/C04	-0.13	SPBC32F12.11	gpd1; tdh1	glyceraldehyde 3-phosphate dehydrogenase; similar to Sp SPBC354.12
TI4896S003871	03/B11	-0.13	SPAC644.10		hypothetical protein
TI4896S000147	17/H06	-0.13	SPCC306.07c		conserved hypothetical protein
TI4896S001302	44/G10	-0.12	SPBC1734.10c		hypothetical protein; Sc homolog is null lethal, and may have vacuolar function/location from 2-hybrid data
TI4896S002290	29/F04	-0.12	SPBC3B8.04c		transporter; unknown specificity
TI4896S002822	42/A06	-0.12	SPAC13G6.04	tim8	mitochondrial carrier; involved in import of zinc finger protein
TI4896S004085	28/E11	-0.12	SPAC1486.03c		G-patch domain; putative septin interacting by similar to D. melanogaster SIP1; no apparent Sc ortholog
TI4896S002354	50/B06	-0.12	SPBC1105.18c	SPBC887.21c	peptidyl tRNA hydrolase; peptide release factor
TI4896S001234	48/F03	-0.12	SPBC646.02	cwf11	complexed with Cdc5p; involved in mRNA splicing; no apparent Sc ortholog
TI4896S000150	51/D12	-0.12	SPCC306.10	wtf8; wtf3-pseudo	wtf element Wtf8
TI4896S002636	22/A12	-0.12	SPBC16G5.07c		prohibitin; involved in cell aging; involved in proteolysis; no apparent Sc ortholog; non-essential
TI4896S002223	04/H08	-0.12	SPBC19F8.02		involved in nuclear migration (sensu Fungi); microtubule-interacting protein; similar to E. nidulans NUDC; eukaryotic conserved protein; no apparent Sc ortholog; non-essential
TI4896S001391	37/D06	-0.12	SPBC3D6.04c		predicted coiled-coil protein; involved in spindle assembly checkpoint
TI4896S003177	23/D12	-0.12	SPAC23C4.12	hhp2	serine/threonine protein kinase; involved in DNA repair (regulation); casein kinase (implicated); similar to Sp hhp1 (paralog); function partially overlapping with Hhp1p
TI4896S000589	16/D09	-0.12	SPCC777.06c		conserved hypothetical; hydrolase; no apparent Sc ortholog
TI4896S001736	23/E02	-0.12	SPBC23G7.01c	SPBC18E5.11c	conserved hypothetical protein; Sc YEL015W (homolog) is possibly involved in splicing and other functions by 2-hybrid analysis
TI4896S003284	35/E08	-0.12	SPAC6F12.05c	tnr3	thiamine pyrophosphokinase (thiamine kinase); regulator of thiamine metabolism; regulator of phosphate metabolism, mating, and growth; Nudix family hydrolase
TI4896S002244	39/F07	-0.12	SPBC25H2.02	ths1	threonyl-tRNA synthetase; cytoplasmic threonyl-tRNA synthetase; involved in threonyl-tRNA aminoacylation; threonine-tRNA ligase activity
TI4896S000005	19/D04	-0.12	SPCC757.01	nic1; SPCC1884.02	NiCoT heavy metal ion transporter; no apparent Sc ortholog
TI4896S001453	32/C06	-0.12	SPBC8D2.16c		conserved hypothetical protein
TI4896S000700	18/H11	-0.12	SPCC297.01	SPCC1223.14	chorismate synthase; involved in aromatic amino acid biosynthesis
TI4896S002717	17/G01	-0.11	SPBC1289.13c		alpha-1,2-galactosyltransferase; GMA12/MNN10 family; predicted N-terminal signal sequence; similar to S. pombe gmh1 and gmh3 and gmh2 and gma12 and SPAC5H10.13C and SPAC637.06 and SPBC8D2.17 paralogs; similar to S. cerevisiae YDR245W and YJL183W
TI4896S003817	49/A05	-0.11	SPAC4A8.12c	sds22	protein phosphatases pp1 regulatory subunit; leucine-rich repeat protein
TI4896S000462	04/D10	-0.11	SPCC23B6.05c	ssb3; rpa3	replication factor-A (subunit 3); ssDNA-binding protein
TI4896S003615	41/F01	-0.11	SPAC20H4.02		guanine nucleotide binding protein
TI4896S003654	05/B01	-0.11	SPAC1783.06c		involved in autophagy; involved in cytoplasm to vacuole targeting
TI4896S003459	43/D12	-0.11	SPAC105.02c		conserved hypothetical; hypothetical protein; ankyrin repeat protein
TI4896S004868	47/D10	-0.11	SPAC29A4.11	rga3	GTPase activator; RhoGAP domain; LIM domain; required for rho-like GTPases
TI4896S000822	03/D06	-0.11	SPCC830.09c		RNase P and RNase MRP subunit; involved in RNA processing
TI4896S003916	51/A12	-0.11	SPAC1805.12c	uep1; ubi2	ubiquitin fusion protein
TI4896S004328	16/G06	-0.11	SPAC1F12.08		cytidylyltransferase; Sc YGR277C is null-lethal
TI4896S000308	11/F02	-0.11	SPCC2H8.04		sequence orphan; hypothetical protein
TI4896S002204	37/E04	-0.11	SPBC776.10c		golgi transport complex (peripheral subunit); involved in intracellular protein transport; involved in secretory pathway; involved in ER to golgi transport
TI4896S001670	21/H09	-0.11	SPBC16E9.13		serine/threonine protein kinase
TI4896S002952	09/B06	-0.11	SPAC227.06		Rab interactor activity; Sc YIP5 is predicted to be involved in vesicular transport and membrane fusion from 2-hybrid data
TI4896S000519	26/D08	-0.11	SPCC622.11		conserved hypothetical; hypothetical protein; conserved in C. elegans, D. melanogaster CG8135 and A. thaliana; no apparent Sc ortholog
TI4896S002321	25/H06	-0.11	SPBC2G2.12		histidine-tRNA ligase; involved in histidyl-tRNA aminoacylation; histidine-tRNA ligase activity
TI4896S000619	02/D12	-0.11	SPCC417.03		very hypothetical protein
TI4896S000172	29/G04	-0.11	SPCC364.05	vps3	CNH domain; involved in intracellular protein transport
TI4896S002332	33/H10	-0.11	SPBC1718.06	msp1	involved in mitochondrial DNA maintenance (required); human homolog OPA1 is mutated in dominant optic atrophy; dynamin family; GTPase; interacts physically with Nim1p
TI4896S003063	14/G05	-0.10	SPAC4G8.11c	atp10	involved in mitochondrial F1-F0 ATPase assembly; ATP synthesis coupled proton transport
TI4896S003846	19/D08	-0.10	SPAC7D4.06c		mannosyltransferase; dolichyl-P-Man, Man(5)GlcNAc(2)-PP-dolichyl mannosyltransferase
TI4896S004984	46/H11	-0.10	SPAC29B12.10c		OPT family oligopeptide transporter; involved in pheromone response; involved in mating-type determination
TI4896S000866	25/H05	-0.10	SPCC965.13		transporter; unknown specificity; unknown specificity; similar to Sp car1 (paralog)
TI4896S002252	28/A09	-0.10	SPBC20F10.08c		hypothetical protein
TI4896S004187	19/E11	-0.10	SPAC3A11.10c		microsomal dipeptidase; non-essential; no apparent Sc ortholog
TI4896S004028	44/E12	-0.10	SPAC24C9.09		mitochondrial threonyl tRNA synthetase; involved in threonyl-tRNA aminoacylation; threonine-tRNA ligase activity
TI4896S004910	42/C06	-0.10	SPAC14C4.08		hypothetical protein; sequence orphan
TI4896S002014	47/G12	-0.10	SPBC685.01	pic1; SPBC336.15	inner centromere protein; involved in chromosome segregation; involved in cytokinesis; serine-rich protein; interacts physically with Ark1p
TI4896S004165	16/C10	-0.10	SPAC959.04c		mannosyltransferase
TI4896S003767	38/C02	-0.10	SPAC32A11.01		hypothetical protein; sequence orphan
TI4896S002916	45/H06	-0.10	SPAC31A2.12		PY motif protein; involved in heavy metal resistance; similar to Sp SPCC584.15C (paralog); possibly binds to ubiquitin-protein ligase
TI4896S000593	15/G05	-0.10	SPCC777.10c	ubc12	experimentally characterised; ubiquitin conjugating enzyme; involved in protein neddylation
TI4896S004453	30/D10	-0.10	SPAC26H5.12		DNA-directed RNA polymerase
TI4896S002655	15/F01	-0.10	SPBC16A3.14		superoxide dismutase; similar to Sp SPBC3H7.04 (paralog)
TI4896S000558	08/B09	-0.10	SPCC584.16c		hypothetical protein; sequence orphan
TI4896S002270	45/E08	-0.10	SPBC17D1.08	SPBC11C11.01	conserved hypothetical; hypothetical protein; rrm RNA recognition motif; no apparent Sc ortholog
TI4896S001974	34/A07	-0.10	SPBC3E7.08c	rad13	DNA repair nuclease; involved in DNA repair; involved in nucleotide-excision repair; XP-G family
TI4896S002463	46/E06	-0.10	SPBC21C3.03		hypothetical protein
TI4896S002875	45/E01	-0.10	SPAC12G12.15		Sad1-interacting factor 3; 1 predicted transmembrane helix; similar to S. cerevisiae YFR048W
TI4896S002027	10/C04	-0.09	SPBC32F12.05c	cwf12; isy1	involved in mRNA splicing; complexed with Cdc5p
TI4896S001949	26/H09	-0.09	SPBC25B2.03		zinc finger protein; zf-C2H2 type
TI4896S002685	45/B07	-0.09	SPBC16C6.07c	rpt1	19S proteasome regulatory subunit; AAA family ATPase
TI4896S000167	15/H12	-0.09	SPCC4G3.04c	coq5	C-methyltransferase; involved in ubiquinone biosynthesis
TI4896S001289	12/H10	-0.09	SPBC337.13c	gtr1	Ras related GTP-binding protein; interacts physically with Gtr2p (C-terminal)
TI4896S004881	42/A05	-0.09	SPAC26F1.11		very hypothetical protein
TI4896S004950	46/C12	-0.09	SPAP8A3.14c		hypothetical protein; involved in mitochondrial metabolism
TI4896S001968	31/B10	-0.09	SPBC3E7.01	fab1; SPBC6B1.11c	1-phosphatidylinositol-4-phosphate 5-kinase activity; involved in signal transductionand conjugation; zinc finger protein; zf-FYVE type; induced by nitrogen starvation; non-essential
TI4896S002152	03/A10	-0.09	SPBC30D10.12c		mitochondrial ribosomal protein S?
TI4896S000994	15/G08	-0.09	SPBC1773.06c		zinc binding dehydrogenase; alcohol dehydrogenase; similar to Sp adh1 (paralog)
TI4896S004674	20/H02	-0.09	SPAC144.17c		6-phosphofructo-2-kinase; fructose-2,6-bisphosphatase
TI4896S000114	29/F08	-0.09	SPCC736.11		argonaute; involved in RNA interference; involved in PTGS; involved in the regulation of chromatin silencing at the centromere; involved in the regulation of histone L9 methylation; functions upstream of swi6; translation initiation factor eif-2c; Piwi domain; ZAP domain; deletion mutant results in lagging chromosomes at mitosis at reduced temperature (frequent); no apparent Sc ortholog
TI4896S001559	28/E04	-0.09	SPBC21B10.03c		involved in polyadenylation
TI4896S003362	46/A01	-0.09	SPAC57A7.12		heat shock protein 70 family
TI4896S000804	44/H04	-0.09	SPCC1620.04c		WD repeat protein; Cdc20/Fizzy family; similar toSp SPAC13G6.08; no apparent Sc ortholog
TI4896S003651	16/B06	-0.09	SPAC1783.03		sequence orphan; hypothetical protein
TI4896S002578	44/F02	-0.09	SPBC1347.06c	cki1	casein kinase I homolog Cki1; serine/threonine protein kinase; regulator of phosphatidylinositol 4-phosphate 5-kinase; similar to Sp SPBP35G2.05C and SPAC1805.05 (paralogs)
TI4896S001615	48/A04	-0.09	SPBC18H10.16		putative membrane transporter; CCC Na-K-Cl transporter
TI4896S004397	18/F11	-0.09	SPAC27E2.03c		GTP-binding protein; GTP1/OBG family
TI4896S004952	16/D02	-0.09	SPAC4D7.02c		glycerophosphoryl diester phosphodiesterase; hydrolyses deacylated phopholipids to G3p and the corresponding alcohols
TI4896S002789	01/B06	-0.09	SPAC11D3.01c		fungal specific; similar to Nc DUF338; possibly involved in sporulation, cell wall synthesis; no apparent Sc ortholog
TI4896S001057	16/A09	-0.09	SPBC428.06c		hypothetical protein; sequence orphan; non-essential
TI4896S004279	37/H05	-0.09	SPAC8C9.15c	tif225	translation initiation factor (eif-2b subiunit); nucleotidyltransferase; guanine nucleotide exchange factor
TI4896S002494	40/H11	-0.09	SPBC211.04c	mis5; mcm6	MCM complex subunit; involved in DNA replication (initiation) (required); essential; loaded onto origins
TI4896S004642	41/B11	-0.09	SPAC12B10.15c		sequence orphan; hypothetical protein
TI4896S000386	26/D11	-0.09	SPCC825.02		similar to human alpha glucosidase II beta subunit; putative protein kinase C substrate; EF hand (inferred from context); putative LDL receptor
TI4896S002457	01/C06	-0.08	SPBC31F10.15c	atp15	mitochondrial F0-ATPase, epsilon subunit
TI4896S003809	34/C05	-0.08	SPAC4A8.05c	myo3	myosin-3 isoform, heavy chain (Type II myosin); involved in cytokinesis; involved in contractile ring assembly; non-essential
TI4896S002391	29/A10	-0.08	SPBP8B7.04		sequence orphan; hypothetical protei
TI4896S003222	05/D02	-0.08	SPAC56F8.15		very hypothetical protein
TI4896S001611	40/D05	-0.08	SPBC18H10.12c	rpl702; rpl7c	60S ribosomal protein L7
TI4896S001003	24/B04	-0.08	SPBC1773.15		membrane transporter; unknown specificity; allantoate permease family; similar to Sp SPCC757.13 and SPCC417.10
TI4896S002177	12/E10	-0.08	SPBC4C3.07		COP9/signalosome complex (subunit 6); MOV34 domain; no apparent Sc ortholog
TI4896S002920	48/C09	-0.08	SPAC31A2.16		RhoGEF; guanine nucleotide exchange factor; no apparent Sc ortholog
TI4896S004612	51/D08	-0.08	SPAC27D7.11c		Sp specific families; glycoprotein; possibly Sp specific; similar to Sp SPAC27D7.09c and SPAC27D7.10c and SPBC3D6.02 (paralogs); tandem duplication
TI4896S002896	51/G04	-0.08	SPAC630.15		hypothetical protein; sequence orphan; poor correlation score; has transcript profile on microarray
TI4896S000197	05/B02	-0.08	SPCP31B10.08c	rpl35a; rpl33	60S ribosomal protein L35a
TI4896S002401	36/H09	-0.08	SPBP8B7.14c	dpb2	DNA polymerase epsilon (subunit b); essential; involved in DNA replication (initiation); assembly of the replicative complex; origin binding
TI4896S001313	33/E06	-0.08	SPBC1709.05	sks2; hsc1	heat shock protein 70 family; confers K-252a resistance
TI4896S000639	45/G05	-0.08	SPCC191.11	inv1	invertase; glycosyl hydrolase family 32; hydrolase, hydrolyzing O-glycosyl compounds; involved in carbohydrate metabolism
TI4896S003450	26/E05	-0.08	SPAC664.09		gamma-glutamyltranspeptidase
TI4896S004543	12/B01	-0.08	SPAC23D3.11		1-acyl dihydroxyacetone phosphate reductase
TI4896S002518	27/H02	-0.08	SPBC1604.02c		conserved hypothetical; PPR domains
TI4896S000307	01/D02	-0.08	SPCC2H8.03		very hypothetical protein
TI4896S003496	12/D05	-0.08	SPAC1002.15c	pmc5; med6	RNA polymerase II holoenzyme component
TI4896S000184	44/B01	-0.08	SPCC970.04c		phosphoprotein; involved in cell polarity; involved in cell cycle progression; essential; involved in bipolar growth; interacts physically with Orb6p
TI4896S004803	44/D01	-0.08	SPAC1952.05		bromodomain protein; SAGA complex; ADA complex; involved in transcriptional activation; acetyltransferase; GNAT family
TI4896S000059	12/C09	-0.08	SPCC1235.04c		FAD synthetase
TI4896S000722	20/H01	-0.08	SPCC18.02		MFS amine transporter; no apparent Sc ortholog
TI4896S002514	44/G02	-0.07	SPBC1604.06c		conserved protein
TI4896S001141	43/C01	-0.07	SPBC947.09		conserved hypothetical; hypothetical protein; possibly fungal specific
TI4896S004360	04/A12	-0.07	SPAC926.05c		zinc finger protein; zf-CSL; DnaJ protein
TI4896S003135	02/C07	-0.07	SPAC222.04c		hypothetical protein
TI4896S001658	32/A08	-0.07	SPBC16E9.01c	SPBP16F5.09c	hypothetical protein; sequence orphan
TI4896S002105	05/H09	-0.07	SPBC2D10.07c		mitochondrial membrane protease subunit
TI4896S000221	30/E05	-0.07	SPCC1183.05c	lig4	involved in DNA repair; BRCT domain; involved in RAD52-independent repair of DNA double-strand breaks
TI4896S004940	31/C03	-0.07	SPAP8A3.04c	hsp9	heat shock protein
TI4896S001362	36/D08	-0.07	SPBC725.07	pex5	peroxisomal targeting signal receptor
TI4896S001300	32/H12	-0.07	SPBC1734.08		STAM like protein; similar to mammalian signal transducing adaptor; VHS domain; src (SH3) homology domain; possibly forms a complex with Vps27p; involved in the recycling of Golgi proteins; putative sorting receptor for ubiquitinated membrane proteins destined for degradation
TI4896S003549	06/D06	-0.07	SPAC9G1.01	SPAC3H1.14	hypothetical protein; involved in vacuolar import and degradation
TI4896S001239	12/A09	-0.07	SPBC646.07c		steroid dehydrogenase; 3-oxo-5-alpha-steroid 4-dehydrogenase; similar to R. norvegicus synaptic glycoprotein sc2
TI4896S004048	41/E12	-0.07	SPAC589.06c		involved in the regulation of inorganic phosphate transport; involved in phosphate metabolism
TI4896S000181	26/F09	-0.07	SPCC970.07c		sequence orphan; hypothetical protein
TI4896S000473	41/E03	-0.07	SPCC1322.11	rpl2302; rpl23-2	60S ribosomal protein L23
TI4896S001186	07/H08	-0.07	SPBC577.14c	spa1; spa	ornithine decarboxylase antizyme; antizyme with programmed ribosomal frameshift; involved in polyamine regulation; no apparent Sc ortholog
TI4896S000972	02/A09	-0.07	SPBC31E1.03	ubl4	ubiquitin family protein
TI4896S003917	42/F08	-0.07	SPAC1805.13	rpl14	60S ribosomal protein L14
TI4896S002630	32/A04	-0.07	SPBC16G5.01	rpn12; mts3; SPBC342.07	19S proteasome regulatory subunit
TI4896S000754	13/F04	-0.07	SPCC1739.05		SET domain; histone lysine methyltransferase
TI4896S003394	01/D06	-0.07	SPAC23H4.05c		very hypothetical protein
TI4896S000800	42/G01	-0.07	SPCC126.15c	sec65	protein signal sequence binding activity; involved in intracellular protein transport; involved in protein-ER targeting; involved in SRP-dependent cotranslational membrane targeting
TI4896S000899	37/D07	-0.07	SPCP1E11.02		Ark1/Prk1 family protein kinase; serine/threonine protein kinase; similar to Sp SPBC6B1.02 and SPBC557.04; actin cortical patch component; consensus phosphorylation target site [LI]XXQXTG (putative)
TI4896S003333	06/C03	-0.07	SPAC3A12.14	cam1	calmodulin; EF hand motifs; calcium binding protein; essential; involved in chromosome segregation (required)
TI4896S003946	19/H12	-0.07	SPAC8F11.04		conserved hypothetical; hypothetical protein
TI4896S002477	42/D10	-0.06	SPBC21C3.17c		hypothetical protein; Sp specific families; possibly Sp specific; similar to Sp SPCP31B10.04
TI4896S002979	25/C12	-0.06	SPAC2F7.17		peptide chain release factor
TI4896S000428	18/F08	-0.06	SPCC550.02c	cwf5; ecm2	RNA-binding protein; involved in mRNA splicing; complexed with Cdc5p; 40S snRNP-containing complex; rrm RNA recognition motif
TI4896S004816	21/H06	-0.06	SPAC890.02c	alp7; mai1	TACC homolog; coiled-coil predicted; non-essential; deletion mutant results in astral microtubule diminishment; deletion mutant results in short metaphase spindles; no apparent orthologs
TI4896S001666	10/D10	-0.06	SPBC16E9.09c		COPII-coated vesicle component; emp24 family; predicted N-terminal signal sequence; involved in intracellular protein transport; involved in secretory pathway
TI4896S002889	47/B04	-0.06	SPAC630.02	SPAC12G12.01c	WD repeat protein (4)
TI4896S000770	08/D11	-0.06	SPCC576.02		hydantoin racemase; similar to Sp SPAC1F7.10 (paralog)
TI4896S003325	46/G06	-0.06	SPAC3A12.06c		putative membrane transport protein; CaCA sodium/calcium exchanger
TI4896S001194	08/F11	-0.06	SPBC530.07c		hypothetical protein; sequence orphan
TI4896S001750	03/A02	-0.06	SPBC23G7.14		very hypothetical protein
TI4896S000358	09/C02	-0.06	SPCC24B10.21	tpi1; tpi	triosephosphate isomerase
TI4896S002182	15/B06	-0.06	SPBC4C3.03		homoserine kinase
TI4896S002526	22/B06	-0.06	SPBC26H8.05c		serine/threonine protein phosphatase
TI4896S001644	23/G08	-0.06	SPBC3H7.06c	pof9	F-box protein
[truncated: 2,756 more rows]
